# Supplementary material for: Combining loss of function of FOLYLPOLYGLUTAMATE SYNTHETASE1 and CAFFEOYL-COA 3-O-METHYLTRANSFERASE1 for lignin reduction and improved saccharification efficiency in Arabidopsis thaliana
Source: Biotechnol Biofuels. 2019 May 3;12:108. doi: 10.1186/s13068-019-1446-3 (PMC6498598; doi:10.1186/s13068-019-1446-3)
Supplement: Supplementary file 8 — Additional file 8: Table S4. Microarray analysis representing 6-week-old stems of WT, fpgs1, ccoaomt1 and fpgs1ccoaomt1 plants. [file 13068_2019_1446_MOESM8_ESM.xlsx]

## Sheet: All
																				2 times	2 times	2 times	2 times	2 times	2 times	2 times	2 times	2 times	2 times	2 times	2 times	2 times	2 times
																				WT:CCff	WT:CCff	WT:ccFF	WT:ccff	WT:CCff	WT:ccFF	WT:ccff	ccFF:ccff	CCff:ccff	WT:CCff	WT:ccFF	WT:ccff	ccFF:ccff	CCff:ccff
																								up in CCff	up in ccFF	up in ccff	up in ccff	up in ccff	161	250	234	4	15
																								down in CCff	down in ccFF	down in ccff	down in ccff	down in ccff	13	22	25	6	6
probeset_ID	Array Design	Gene Description	WT1	WT2	CCff1	CCff2	ccFF1	ccFF2	ccff1	ccff2	probe set	WT1	WT2	CCff1	CCff2	ccFF1	ccFF2	ccff1	ccff2	Ave WT	Ave CCff	Ave ccFF	Ave ccff	Ratio(CCff/WT)	Ratio(ccFF/WT)	Ratio(ffcc/WT)	Ratio(ffcc/ccFF)	Ratio(ffcc/CCff)	WT:CCff	WT:ccFF	WT:ccff	ccFF:ccff	CCff:ccff
248864_at	At5g46760	MYC3 is a JAZ-interacting transcription factor that act together with MYC2 and MYC4 to activate JA-responses.	140.07	112.986	130.69	116.162	32.8996	103.25	118.603	96.3358	248864_at	P	P	P	P	P	P	P	P	126.528	123.426	68.0749	107.47	0.975485	0.538023	0.849375	1.5787	0.87072
249349_at	At5g40350	Myb24 transcription factor. Member of the R2R3 factor gene family. Induced by jasmonate. Involved in jasmonate response during stamen development.	6.63456	6.49802	6.49802	7.31065	5.85634	6.54322	5.27803	6.1475	249349_at	A	A	A	A	A	A	A	A	6.56629	6.90434	6.19978	5.71277	1.05148	0.944183	0.870015	0.921447	0.827417
246161_at	At5g20900	jasmonate-zim-domain protein 12 (JAZ12); FUNCTIONS IN: protein binding; INVOLVED IN: biological_process unknown; LOCATED IN: cellular_component unknown; EXPRESSED IN: 25 plant structures; EXPRESSED DURING: 13 growth stages; CONTAINS InterPro DOMAIN/s: Tify (InterPro:IPR010399), CCT domain-like (InterPro:IPR018467); BEST Arabidopsis thaliana protein match is: jasmonate-zim-domain protein 11 (TAIR:…	643.591	760.076	749.612	729.114	749.612	666.287	596.344	588.134	246161_at	P	P	P	P	P	P	P	P	701.833	739.363	707.949	592.239	1.05347	1.00871	0.843845	0.836555	0.801012
250292_at	At5g13220	Plants overexpressing At5g13220.3, but not At5g13220.1 showed enhanced insensitivity to MeJa.	11.3924	25.8125	29.8571	49.18	28.0514	56.8859	17.6305	24.59	250292_at	P	P	P	P	P	P	P	P	18.6025	39.5185	42.4687	21.1102	2.12437	2.28296	1.13481	0.497078	0.534186
250439_at	At5g10450	Encodes a member of the 14-3-3 gene family that is a lambda isoform (14-3-3&#955;). Interacts with APX3 (ascorbate peroxidase) and AKR2 , suggesting a role in mediating oxidative metabolism in stress response. This protein was shown to colocalize and interact with SERK1 by which it is phosphorylated. This protein is also reported to interact with the phosphorylated form of the BZR1 transcription …	1499.22	1389.16	1323.37	1192.69	451.944	1379.57	1488.87	1332.57	250439_at	P	P	P	P	P	P	P	P	1444.19	1258.03	915.756	1410.72	0.871094	0.634095	0.976823	1.5405	1.12137
253752_at	At4g28910	novel interactor of JAZ (NINJA); CONTAINS InterPro DOMAIN/s: Protein of unknown function DUF1675 (InterPro:IPR012463); BEST Arabidopsis thaliana protein match is: ABI five binding protein 3 (TAIR:AT3G29575.4); Has 317 Blast hits to 301 proteins in 73 species: Archae - 2; Bacteria - 15; Metazoa - 43; Fungi - 39; Plants - 175; Viruses - 3; Other Eukaryotes - 40 (source: NCBI BLink).	202.251	218.275	206.5	190.019	139.102	195.361	219.793	206.5	253752_at	P	P	P	P	P	P	P	P	210.263	198.26	167.232	213.147	0.942915	0.795347	1.01372	1.27456	1.07509
254693_at	At4g17880	MYC4 is a JAZ-interacting transcription factor that act together with MYC2 and MYC3 to activate JA-responses.	124.5	138.141	79.8932	103.968	136.239	115.36	116.97	107.635	254693_at	P	P	P	P	P	P	P	P	131.321	91.9307	125.8	112.303	0.700048	0.957959	0.855179	0.892709	1.2216
245271_at	At4g16430	basic helix-loop-helix (bHLH) DNA-binding superfamily protein; FUNCTIONS IN: DNA binding, sequence-specific DNA binding transcription factor activity; INVOLVED IN: regulation of transcription; LOCATED IN: nucleus; EXPRESSED IN: 22 plant structures; EXPRESSED DURING: 13 growth stages; CONTAINS InterPro DOMAIN/s: Helix-loop-helix DNA-binding domain (InterPro:IPR001092), Helix-loop-helix DNA-binding…	89.8845	89.8845	85.0359	92.4115	70.0348	83.2859	107.635	85.6274	245271_at	P	P	P	P	P	P	P	P	89.8845	88.7237	76.6603	96.6311	0.987086	0.852876	1.07506	1.26051	1.08912
255056_at	At4g09820	TT8 is a regulation factor that acts in a concerted action with TT1, PAP1 and TTG1 on the regulation of flavonoid pathways, namely proanthocyanidin and anthocyanin biosynthesis. Affects dihydroflavonol 4-reductase gene expression. It is thought that a ternary complex composed of TT2, TT8 and TTG1 is necessary for correct expression of BAN in seed endothelium. Also important for important for marg…	35.5062	33.5909	43.4113	23.9176	18.8959	20.6776	42.5179	22.6274	255056_at	P	P	P	A	A	A	P	P	34.5486	33.6645	19.7868	32.5727	0.97441	0.572723	0.942808	1.64619	0.967569
255644_at	At4g00870	basic helix-loop-helix (bHLH) DNA-binding superfamily protein; FUNCTIONS IN: DNA binding, sequence-specific DNA binding transcription factor activity; INVOLVED IN: regulation of transcription; LOCATED IN: nucleus; EXPRESSED IN: 9 plant structures; EXPRESSED DURING: 6 growth stages; CONTAINS InterPro DOMAIN/s: Helix-loop-helix DNA-binding domain (InterPro:IPR001092), Helix-loop-helix DNA-binding (…	8.39773	8.57419	8.33973	8.45614	8.11168	8.57419	8.05564	9.31787	255644_at	A	A	A	A	A	A	A	A	8.48596	8.39794	8.34293	8.68676	0.989627	0.983145	1.02366	1.04121	1.03439
257221_at	At3g27920	Encodes a Myb-like protein that is required for induction of trichome development.	6.45313	6.27667	6.6807	6.72717	7.3615	6.40856	6.1475	7.31065	257221_at	A	A	A	A	A	A	A	P	6.3649	6.70394	6.88503	6.72908	1.05327	1.08172	1.05722	0.977349	1.00375
258237_at	At3g27810	Encodes a member of the R2R3-MYB transcription factor gene family. Induced by jasmonate. Involved in jasmonate response during stamen development.	5.6962	5.09824	5.6962	5.6962	6.23332	5.50217	5.77572	5.61778	258237_at	A	A	A	A	A	A	P	A	5.39722	5.6962	5.86774	5.69675	1.0554	1.08718	1.0555	0.970859	1.0001
258189_at	At3g17860	JAZs are direct targets of the SCFCOI1 E3 ubiquitin-ligase and JA treatment induces their proteasome-mediated degradation. Furthermore, JAI3 negatively regulates the key transcriptional activator of JA responses, AtMYC2. The C-terminal portion of JAZ3, including the Jas domain, appears to be important for JAZ3-COI1 binding in the presence of coronatine.	128.89	184.823	149.086	182.278	199.466	165.421	134.364	139.102	258189_at	P	P	P	P	P	P	P	P	156.857	165.682	182.444	136.733	1.05627	1.16312	0.871706	0.749453	0.825272
257693_at	At3g12850	COP9 signalosome complex-related / CSN complex-related; BEST Arabidopsis thaliana protein match is: 26S proteasome, regulatory subunit Rpn7;Proteasome component (PCI) domain (TAIR:AT3G61140.1); Has 103 Blast hits to 103 proteins in 41 species: Archae - 0; Bacteria - 0; Metazoa - 36; Fungi - 2; Plants - 53; Viruses - 0; Other Eukaryotes - 12 (source: NCBI BLink).	8.69388	10.0561	9.38268	10.5561	9.06307	9.12611	8.75435	10.9283	257693_at	A	P	A	A	A	P	A	P	9.37499	9.96937	9.09459	9.84134	1.0634	0.97009	1.04974	1.08211	0.987157
259187_at	At3g01530	Member of the R2R3 factor gene family.	12.042	10.6295	11.1579	12.2101	11.0043	12.4666	10.9283	12.2101	259187_at	A	A	A	A	A	A	P	A	11.3357	11.684	11.7355	11.5692	1.03072	1.03526	1.0206	0.98583	0.990173
259118_at	At3g01310	Phosphoglycerate mutase-like family protein; FUNCTIONS IN: oxidoreductase activity, transition metal ion binding, acid phosphatase activity; INVOLVED IN: oxidation reduction; LOCATED IN: plasma membrane; EXPRESSED IN: 24 plant structures; EXPRESSED DURING: 13 growth stages; CONTAINS InterPro DOMAIN/s: ATP-grasp fold, RimK-type (InterPro:IPR013651), Histidine phosphatase superfamily, clade-2 (Inte…	621.668	530.056	580.037	448.822	630.346	530.056	526.394	484.382	259118_at	P	P	P	P	P	P	P	P	575.862	514.429	580.201	505.388	0.893321	1.00753	0.87762	0.871057	0.982424
265452_at	At2g46510	Encodes a nuclear localized BLH domain containing transcriptional activator involved in response to ABA. Overexpression confers enhanced ABA responsiveness while loss of function mutants are ABA sensitive.	37.5307	58.4852	80.4489	112.206	150.123	121.938	75.5835	90.5097	265452_at	P	P	P	M	P	P	P	M	48.008	96.3272	136.03	83.0466	2.00648	2.83349	1.72985	0.610501	0.86213		1
263786_at	At2g46370	Encodes a jasmonate-amido synthetase that is a member of the GH3 family of proteins. JAR1 catalyzes the formation of a biologically active jasmonyl-isoleucine (JA-Ile) conjugate. JA-Ile promotes the interaction between JAZ1 and COI1 in the jasmonate signaling pathway. JAR1 localizes to the cytoplasm and is also a phytochrome A signaling component. JAR1 is an auxin-induced gene. Loss of function m…	377.413	398.932	317.365	342.509	413.001	344.892	354.588	393.44	263786_at	P	P	P	P	P	P	P	P	388.173	329.937	378.946	374.014	0.849976	0.976231	0.963525	0.986985	1.13359
266901_at	At2g34600	jasmonate-zim-domain protein 7 (JAZ7); CONTAINS InterPro DOMAIN/s: Tify (InterPro:IPR010399); BEST Arabidopsis thaliana protein match is: jasmonate-zim-domain protein 8 (TAIR:AT1G30135.1); Has 38 Blast hits to 38 proteins in 7 species: Archae - 0; Bacteria - 0; Metazoa - 0; Fungi - 0; Plants - 38; Viruses - 0; Other Eukaryotes - 0 (source: NCBI BLink).	6.23332	7.83536	26.1729	106.891	81.0084	112.986	22.9433	55.3304	266901_at	A	P	P	P	P	P	P	P	7.03434	66.5321	96.9972	39.1368	9.45818	13.7891	5.56368	0.403484	0.58824	1	1	1
262171_at	At1g74950	TIFY10B; CONTAINS InterPro DOMAIN/s: Tify (InterPro:IPR010399), CCT domain-like (InterPro:IPR018467); BEST Arabidopsis thaliana protein match is: jasmonate-zim-domain protein 1 (TAIR:AT1G19180.1); Has 432 Blast hits to 427 proteins in 29 species: Archae - 0; Bacteria - 0; Metazoa - 0; Fungi - 0; Plants - 432; Viruses - 0; Other Eukaryotes - 0 (source: NCBI BLink).	272.479	344.892	390.722	487.751	560.278	430.539	300.246	315.173	262171_at	P	P	P	P	P	P	P	P	308.685	439.237	495.409	307.709	1.42293	1.6049	0.996838	0.621122	0.700555
260429_at	At1g72450	JAZ6 transcript levels rise in response to a jasmonate stimulus and a GFP:JAZ6 fusion protein localizes to the nucleus. Application of jasmonate methyl ester to Arabidopsis roots reduces the levels of a JAZ6:GUS fusion protein, presumably by stimulating ubiquitin-proteasome-mediated degradation.	369.646	458.253	855.13	1332.57	1448.15	1398.83	699.413	975.501	260429_at	P	P	P	P	P	P	P	P	413.949	1093.85	1423.49	837.457	2.64248	3.4388	2.02309	0.588313	0.765604		1
260205_at	At1g70700	JAZ9 is a protein presumed to be involved in jasmonate signaling. JAZ9 transcript levels rise in response to a jasmonate stimulus. JAZ9 can interact with the COI1 F-box subunit of an SCF E3 ubiquitin ligase in a yeast-two-hybrid assay only in the presence of jasmonate-isoleucine (JA-ILE) or coronatine. The Jas domain appears to be important for JAZ9-COI1 interactions in the presence of coronatine…	256	613.109	433.534	560.278	380.038	497.999	284.05	310.834	260205_at	P	P	P	P	P	P	P	P	434.555	496.906	439.019	297.442	1.14348	1.01027	0.684475	0.677515	0.598588
245628_at	At1g56650	Encodes a putative MYB domain containing transcription factor involved in anthocyanin metabolism and radical scavenging. Essential for the sucrose-mediated expression of the dihydroflavonol reductase gene.	183.546	278.204	272.479	181.019	136.239	163.144	106.891	91.7731	245628_at	P	P	P	P	P	P	P	P	230.875	226.749	149.692	99.3322	0.982128	0.648366	0.430242	0.663579	0.438071
261297_at	At1g48500	jasmonate-zim-domain protein 4 (JAZ4); CONTAINS InterPro DOMAIN/s: Tify (InterPro:IPR010399), CCT domain-like (InterPro:IPR018467); BEST Arabidopsis thaliana protein match is: jasmonate-zim-domain protein 3 (TAIR:AT3G17860.1); Has 328 Blast hits to 328 proteins in 29 species: Archae - 0; Bacteria - 0; Metazoa - 0; Fungi - 1; Plants - 326; Viruses - 0; Other Eukaryotes - 1 (source: NCBI BLink).	14.42	16.2234	9.57983	9.38268	15.5625	11.5514	11.0809	9.57983	261297_at	P	P	A	P	P	P	P	P	15.3217	9.48125	13.557	10.3304	0.618813	0.884822	0.674231	0.761996	1.08956
256159_at	At1g30135	jasmonate-zim-domain protein 8 (JAZ8); CONTAINS InterPro DOMAIN/s: Tify (InterPro:IPR010399), CCT domain-like (InterPro:IPR018467); BEST Arabidopsis thaliana protein match is: jasmonate-zim-domain protein 7 (TAIR:AT2G34600.1); Has 89 Blast hits to 89 proteins in 12 species: Archae - 0; Bacteria - 0; Metazoa - 0; Fungi - 0; Plants - 89; Viruses - 0; Other Eukaryotes - 0 (source: NCBI BLink).	9.12611	9.91766	13.737	46.5271	56.493	52.7098	17.6305	49.5221	256159_at	A	P	P	P	M	P	P	P	9.52189	30.1321	54.6014	33.5763	3.16451	5.73431	3.52622	0.614934	1.1143	1	1	1
256017_at	At1g19180	JAZ1 is a nuclear-localized protein involved in jasmonate signaling. JAZ1 transcript levels rise in response to a jasmonate stimulus. JAZ1 can interact with the COI1 F-box subunit of an SCF E3 ubiquitin ligase in a yeast-two-hybrid assay only in the presence of jasmonate-isoleucine (JA-ILE) or coronatine. Application of jasmonate methyl ester to Arabidopsis roots reduces the levels of a JAZ1:GUS …	42.5179	86.8227	418.766	548.748	608.874	471.136	326.288	464.65	256017_at	P	P	P	P	P	P	P	P	64.6703	483.757	540.005	395.469	7.48036	8.35012	6.11515	0.732343	0.817495	1	1	1
261033_at	At1g17380	jasmonate-zim-domain protein 5 (JAZ5); CONTAINS InterPro DOMAIN/s: Tify (InterPro:IPR010399), CCT domain-like (InterPro:IPR018467); BEST Arabidopsis thaliana protein match is: jasmonate-zim-domain protein 6 (TAIR:AT1G72450.1); Has 301 Blast hits to 296 proteins in 28 species: Archae - 0; Bacteria - 0; Metazoa - 0; Fungi - 0; Plants - 301; Viruses - 0; Other Eukaryotes - 0 (source: NCBI BLink).	31.779	92.4115	312.996	675.588	467.882	533.742	282.088	608.874	261033_at	P	P	P	P	P	P	P	P	62.0952	494.292	500.812	445.481	7.96023	8.06523	7.17416	0.889517	0.90125	1	1	1
261050_at	At1g01260	basic helix-loop-helix (bHLH) DNA-binding superfamily protein; FUNCTIONS IN: DNA binding, sequence-specific DNA binding transcription factor activity; INVOLVED IN: regulation of transcription; LOCATED IN: nucleus; EXPRESSED IN: 24 plant structures; EXPRESSED DURING: 15 growth stages; CONTAINS InterPro DOMAIN/s: Helix-loop-helix DNA-binding domain (InterPro:IPR001092), Helix-loop-helix DNA-binding…	90.5097	99.0442	106.891	103.968	70.0348	101.125	96.3358	101.829	261050_at	P	P	P	P	P	P	P	P	94.7769	105.43	85.58	99.0822	1.1124	0.902963	1.04543	1.15777	0.939794
245004_at	ycf9	hypothetical protein	1168.14	1552.09	873.098	1009.9	1332.57	1045.52	760.076	929.3	245004_at	P	P	P	P	P	P	P	P	1360.12	941.5	1189.05	844.688	0.69222	0.874222	0.62104	0.710392	0.897172
245000_at	ycf6	hypothetical protein	61.3929	58.892	51.6251	50.9143	93.0542	56.8859	50.5626	52.3457	245000_at	P	P	P	P	P	P	P	P	60.1425	51.2697	74.9701	51.4542	0.852471	1.24654	0.855539	0.68633	1.0036
244961_at	ycf5	hypothetical protein	831.746	809.002	680.287	634.73	955.426	596.344	572.051	661.685	244961_at	P	P	P	P	P	P	P	P	820.374	657.509	775.885	616.868	0.801474	0.945769	0.751935	0.795051	0.93819
245018_at	ycf4	hypothetical protein	272.479	340.144	205.074	205.074	215.269	245.572	219.793	254.232	245018_at	P	P	P	P	P	P	P	P	306.311	205.074	230.421	237.012	0.669495	0.752243	0.773763	1.02861	1.15574
245008_at	ycf3	hypothetical protein	56.1028	71.0124	42.2243	39.9466	81.5719	37.7918	38.8542	39.1245	245008_at	P	P	P	P	P	P	P	P	63.5576	41.0854	59.6818	38.9894	0.646428	0.939019	0.613449	0.653287	0.948983
244989_s_at	ycf2.1	hypothetical protein	29.8571	30.6965	24.761	27.4741	30.2738	25.8125	22.6274	25.6342	244989_s_at	P	P	P	P	P	P	P	P	30.2768	26.1176	28.0432	24.1308	0.862628	0.926228	0.797008	0.860488	0.923931
245019_at	ycf10_cemA	hypothetical protein	427.565	508.463	280.139	232.325	288.015	328.557	326.288	308.687	245019_at	P	P	P	P	P	P	P	P	468.014	256.232	308.286	317.487	0.547488	0.658711	0.678371	1.02985	1.23906
244993_s_at	ycf1.1	hypothetical protein	167.73	159.786	141.044	130.69	670.921	113.772	157.586	103.25	244993_s_at	P	P	P	P	P	P	P	P	163.758	135.867	392.347	130.418	0.829678	2.39589	0.796407	0.332406	0.959899				2
244981_at	rps8	ribosomal protein S8	152.219	159.786	153.277	86.2229	72.5046	117.784	150.123	116.162	244981_at	P	P	P	P	P	P	P	P	156.002	119.75	95.1443	133.143	0.767617	0.60989	0.853465	1.39938	1.11184
244992_s_at	rps7.1_chloroplast	ribosomal protein S7	3258.52	3125.78	2556.58	2134.97	2778.33	2210.26	2179.83	2418.67	244992_s_at	P	P	P	P	P	P	P	P	3192.15	2345.78	2494.29	2299.25	0.734858	0.781384	0.720283	0.921805	0.980167
245009_at	rps4.chloroplast	ribosomal protein S4	617.374	719.076	588.134	418.766	744.434	515.561	445.722	481.036	245009_at	P	P	P	P	P	P	P	P	668.225	503.45	629.998	463.379	0.753414	0.942793	0.693448	0.735525	0.920407
244984_at	rps3.chloroplast	ribosomal protein S3	867.067	891.444	837.532	685.019	1305.15	670.921	749.612	680.287	244984_at	P	P	P	P	P	P	P	P	879.255	761.275	988.036	714.95	0.865818	1.12372	0.813131	0.723607	0.939147
244996_at	rps2	ribosomal protein S2	106.153	125.366	95.0095	94.3532	85.6274	78.249	79.3413	80.4489	244996_at	P	P	P	P	P	P	A	P	115.759	94.6814	81.9382	79.8951	0.817916	0.707832	0.690182	0.975065	0.843831
244986_at	rps19	ribosomal protein S19	837.532	916.506	837.532	588.134	855.13	704.277	714.109	588.134	244986_at	P	P	P	P	P	P	P	P	877.019	712.833	779.704	651.121	0.812791	0.889039	0.742426	0.835088	0.913428
244969_at	rps18	ribosomal protein S18	182.278	177.294	165.421	153.277	300.246	174.853	183.546	148.056	244969_at	P	P	P	P	P	P	P	P	179.786	159.349	237.549	165.801	0.886326	1.32129	0.922213	0.697965	1.04049
245049_at	rps16	ribosomal protein S16	20.5348	19.2929	17.7531	18.2522	32.6724	17.1484	17.6305	18.0009	245049_at	P	P	P	P	M	A	A	P	19.9139	18.0027	24.9104	17.8157	0.904026	1.25091	0.894638	0.715192	0.989615
244938_at	rps15	ribosomal protein S15	57.2816	57.2816	40.5042	44.6318	84.4485	38.3193	43.7133	45.8866	244938_at	P	P	P	P	P	A	P	A	57.2816	42.568	61.3839	44.7999	0.743136	1.07162	0.7821	0.729832	1.05243
245005_at	rps14	ribosomal protein S14	12.8171	17.0299	12.1257	14.5203	28.443	14.42	10.7034	12.9063	245005_at	A	P	P	P	P	P	P	P	14.9235	13.323	21.4315	11.8048	0.892753	1.43609	0.791023	0.550818	0.886049
244940_at	rps12.2	ribosomal protein S12 (trans-splice part 2 of 2)	1758.34	1722.16	1360.57	1105.13	552.565	1089.92	1234.75	1209.34	244940_at	P	P	P	P	P	P	P	P	1740.25	1232.85	821.24	1222.04	0.708434	0.471909	0.702222	1.48804	0.991232
244939_at	rps12.1	ribosomal protein S12 (trans-splice part 1 of 2)	263.197	261.379	191.341	163.144	65.3448	183.546	177.294	186.108	244939_at	P	P	P	P	P	P	P	P	262.288	177.242	124.446	181.701	0.675754	0.474461	0.692754	1.46009	1.02516
244979_at	rps11	ribosomal protein S11	1884.54	2033.85	2091.03	1686.71	935.763	1770.57	1833.01	1722.16	244979_at	P	P	P	P	P	P	P	P	1959.2	1888.87	1353.17	1777.58	0.964105	0.690674	0.907301	1.31365	0.941081
244997_at	rpoC2	RNA polymerase beta' subunit-2	25.8125	30.4844	24.59	23.7524	25.9921	23.7524	22.6274	22.9433	244997_at	P	P	P	P	M	P	P	P	28.1485	24.1712	24.8722	22.7854	0.858703	0.883608	0.80947	0.916096	0.942666
244998_at	rpoC1	RNA polymerase beta' subunit-1	55.3304	58.4852	46.8507	19.0273	63.1189	37.2715	35.261	27.8576	244998_at	P	P	P	P	P	P	P	P	56.9078	32.939	50.1952	31.5593	0.578814	0.882044	0.554569	0.628731	0.958112
244999_at	rpoB	RNA polymerase beta subunit	9.51366	8.87656	9.38268	10.1965	10.9283	10.4107	10.6295	11.2356	244999_at	P	A	A	A	P	P	P	P	9.19511	9.78958	10.6695	10.9325	1.06465	1.16035	1.18895	1.02465	1.11675
244978_at	rpoA	RNA polymerase alpha subunit	1097.5	1226.22	1120.56	797.865	2164.77	922.88	989.119	929.3	244978_at	P	P	P	P	P	P	P	P	1161.86	959.211	1543.83	959.209	0.825584	1.32876	0.825583	0.621319	0.999999
244980_at	rpl36	ribosomal protein L36	364.557	367.093	364.557	263.197	133.436	280.139	292.036	259.574	244980_at	P	P	P	P	P	P	P	P	365.825	313.877	206.787	275.805	0.857998	0.565264	0.753926	1.33376	0.878703
244968_at	rpl33	ribosomal protein L33	564.175	670.921	556.408	519.147	709.176	608.874	588.134	556.408	244968_at	P	P	P	P	P	P	P	P	617.548	537.778	659.025	572.271	0.870827	1.06716	0.926682	0.86836	1.06414
244960_at	rpl32	ribosomal protein L32	1144.1	1074.91	989.119	1031.12	1389.16	975.501	1136.2	1009.9	244960_at	P	P	P	P	P	P	P	P	1109.51	1010.12	1182.33	1073.05	0.910424	1.06564	0.967143	0.907571	1.0623
244988_s_at	rpl23.1	ribosomal protein L23	714.109	770.686	685.019	515.561	207.937	548.748	652.575	548.748	244988_s_at	P	P	P	P	P	P	P	M	742.398	600.29	378.342	600.662	0.808583	0.509622	0.809083	1.58761	1.00062
244985_at	rpl22	ribosomal protein L22	652.575	675.588	544.958	418.766	694.581	484.382	537.455	439.586	244985_at	P	P	P	P	P	P	P	P	664.082	481.862	589.481	488.52	0.725606	0.887664	0.735633	0.828729	1.01382
244970_at	rpl20	ribosomal protein L20	25.9921	28.84	21.7057	18.2522	57.68	20.5348	20.393	20.2521	244970_at	P	P	P	P	P	P	P	P	27.416	19.9789	39.1074	20.3225	0.728732	1.42644	0.741264	0.519659	1.0172
244987_s_at	rpl2.1_chloro	ribosomal protein L2	2272.4	2368.9	2179.83	1686.71	1192.69	1871.53	2134.97	2005.85	244987_s_at	P	P	P	P	P	P	P	P	2320.65	1933.27	1532.11	2070.41	0.833074	0.660207	0.89217	1.35135	1.07094
244944_s_at	rpl16.mitochondria	ribosomal protein L16	77.1717	99.0442	66.257	58.892	100.427	74.028	63.1189	49.5221	244944_s_at	P	P	P	P	P	P	P	P	88.1079	62.5745	87.2274	56.3205	0.710203	0.990006	0.639222	0.645674	0.900055
244983_at	rpl16.chloroplast	ribosomal protein L16	286.026	294.067	225.972	143.013	190.019	156.498	206.5	165.421	244983_at	P	P	P	P	P	P	P	P	290.046	184.492	173.258	185.961	0.636079	0.597348	0.641142	1.07331	1.00796
244982_at	rpl14	ribosomal protein L14	333.144	342.509	270.597	207.937	326.288	215.269	233.941	225.972	244982_at	P	P	P	P	P	P	P	P	337.826	239.267	270.779	229.956	0.708253	0.801531	0.680694	0.849242	0.961089
245015_at	rbcL	large subunit of riblose-1,5-bisphosphate carboxylase/oxygenase	451.944	568.1	398.932	385.343	401.707	477.713	362.039	372.217	245015_at	P	P	P	P	P	P	P	P	510.022	392.138	439.71	367.128	0.768865	0.86214	0.719828	0.834932	0.936222
244973_at	psbT	PSII T protein	70.5219	84.4485	36.2523	20.1122	65.3448	33.5909	32.6724	35.5062	244973_at	P	M	P	P	P	P	P	P	77.4852	28.1822	49.4679	34.0893	0.363711	0.638417	0.439946	0.68912	1.2096	2		2
244974_at	psbN	PSII low MW protein	155.417	147.033	107.635	93.0542	155.417	113.772	94.3532	119.428	244974_at	P	P	P	P	P	P	P	P	151.225	100.344	134.594	106.891	0.663544	0.890026	0.706832	0.794169	1.06524
245001_at	psbM	PSII low MW protein	7858.29	7967.99	7181.15	8135.41	8248.98	7750.1	8306.36	8079.22	245001_at	P	P	P	P	P	P	P	P	7913.14	7658.28	7999.54	8192.79	0.967793	1.01092	1.03534	1.02416	1.06979
245022_at	psbL	PSII L protein	481.036	458.253	404.501	388.023	380.038	404.501	436.549	455.087	245022_at	P	P	P	M	P	A	P	P	469.644	396.262	392.27	445.818	0.84375	0.835248	0.949268	1.13651	1.12506
245050_at	psbK	PSII K protein	1910.85	1871.53	1105.13	903.888	1016.93	1269.46	1176.27	1296.13	245050_at	P	P	M	P	P	P	P	P	1891.19	1004.51	1143.19	1236.2	0.531152	0.604484	0.653663	1.08136	1.23065
245021_at	psbJ	PSII component	942.272	942.272	910.175	955.426	1192.69	855.13	989.119	962.071	245021_at	P	P	P	P	P	P	P	P	942.272	932.8	1023.91	975.595	0.989948	1.08664	1.03536	0.952815	1.04588
245023_at	psbI	PSII I protein	2033.85	2062.24	1260.69	1031.12	1398.83	1448.15	1408.55	1408.55	245023_at	P	P	P	P	P	P	P	P	2048.05	1145.91	1423.49	1408.55	0.559512	0.695047	0.687754	0.989508	1.2292
244975_at	psbH	PSII 10KDa phosphoprotein	1038.29	1112.82	734.185	657.114	292.036	861.078	765.363	786.88	244975_at	P	P	P	P	P	P	P	P	1075.56	695.65	576.557	776.121	0.646782	0.536055	0.721601	1.34613	1.11568
245011_at	psbG	photosystem II G protein	315.173	377.413	190.019	142.025	191.341	194.012	199.466	183.546	245011_at	P	P	P	P	P	P	P	P	346.293	166.022	192.676	191.506	0.479426	0.556397	0.553018	0.993928	1.1535	2
244963_at	psbF	PSII cytochrome b559	1520.15	1675.06	1520.15	1438.15	1097.5	1629.26	1595.73	1686.71	244963_at	P	P	P	P	P	P	P	P	1597.61	1479.15	1363.38	1641.22	0.925854	0.853387	1.0273	1.20379	1.10957
244964_at	psbE	PSII cytochrome b559	910.175	929.3	873.098	826.001	385.343	962.071	903.888	897.644	244964_at	P	P	P	M	P	P	P	P	919.737	849.55	673.707	900.766	0.923687	0.7325	0.979373	1.33703	1.06029
245002_at	psbD	PSII D2 protein	427.565	494.559	369.646	335.461	146.018	380.038	310.834	407.315	245002_at	P	P	P	P	P	P	P	P	461.062	352.553	263.028	359.074	0.764655	0.570482	0.778798	1.36516	1.0185
245003_at	psbC	PSII 43 KDa protein	803.414	989.119	572.051	477.713	315.173	613.109	512	572.051	245003_at	P	P	P	P	P	P	P	P	896.266	524.882	464.141	542.026	0.585632	0.517861	0.604759	1.1678	1.03266
244972_at	psbB	PSII 47KDa protein	202.251	232.325	120.259	93.7015	116.97	133.436	112.986	136.239	244972_at	P	P	P	P	P	P	P	P	217.288	106.98	125.203	124.613	0.492343	0.576208	0.573492	0.995285	1.16482	2
245047_at	psbA	PSII 32 KDa protein	1964.57	2179.83	1629.26	1595.73	1552.09	1509.65	1314.23	1552.09	245047_at	P	P	P	P	P	P	P	P	2072.2	1612.49	1530.87	1433.16	0.778155	0.738766	0.691613	0.936172	0.888785
244967_at	psaJ	PSI J protein	897.644	1112.82	560.278	421.679	445.722	608.874	568.1	625.992	244967_at	P	P	P	P	P	P	P	P	1005.23	490.978	527.298	597.046	0.488424	0.524554	0.593939	1.13227	1.21603
245017_at	psaI	PSI I protein	1120.56	1234.75	820.296	666.287	786.88	826.001	734.185	792.353	245017_at	P	P	P	P	P	P	P	P	1177.65	743.291	806.441	763.269	0.631164	0.684787	0.648128	0.946467	1.02688
244932_at	psaC	PSI 9KDa protein	229.126	199.466	99.7331	100.427	93.7015	124.5	133.436	133.436	244932_at	P	P	P	P	P	P	P	P	214.296	100.08	109.101	133.436	0.467017	0.509111	0.622669	1.22305	1.33329	2
245006_at	psaB	PSI P700 apoprotein A2	4770.75	5480.15	4608.24	4299.64	4576.41	4640.29	3691.52	4211.15	245006_at	P	P	P	P	P	P	P	P	5125.45	4453.94	4608.35	3951.34	0.868985	0.899111	0.770925	0.85743	0.887156
245007_at	psaA	PSI P700 apoprotein A1	288.015	337.794	224.411	184.823	88.0347	219.793	190.019	229.126	245007_at	P	P	P	P	P	P	P	P	312.904	204.617	153.914	209.573	0.653928	0.491887	0.669766	1.36162	1.02422
244966_at	petG	cytochrome b6-f complex, subunit V	15.3482	14.8254	10.1965	11.3137	26.9087	10.3388	13.6422	13.6422	244966_at	P	A	P	P	M	P	M	P	15.0868	10.7551	18.6238	13.6422	0.71288	1.23444	0.904244	0.732514	1.26844
244977_at	petD	cytochrome b/f	145.009	159.786	54.5686	55.3304	85.0359	55.7152	41.9326	49.5221	244977_at	P	P	P	P	P	P	P	P	152.398	54.9495	70.3756	45.7273	0.360566	0.461789	0.300053	0.649762	0.83217	2	2	2
244976_at	petB	cytochrome B6	6888.62	7332.05	5518.27	5077.84	5673.41	6165.49	5442.3	5404.7	244976_at	P	P	P	P	P	P	P	P	7110.33	5298.06	5919.45	5423.5	0.74512	0.832514	0.762763	0.916217	1.02368
245020_at	petA	cytochrome f	652.575	754.826	508.463	421.679	617.374	515.561	494.559	477.713	245020_at	P	P	P	P	P	P	P	P	703.7	465.071	566.467	486.136	0.660893	0.804984	0.690828	0.858189	1.04529
244928_s_at	orfX	hypothetical protein	32.2226	35.0174	30.2738	39.3966	31.125	39.3966	27.0958	34.7755	244928_s_at	P	P	P	P	P	P	P	P	33.62	34.8352	35.2608	30.9357	1.03615	1.0488	0.920157	0.877339	0.888057
244990_s_at	orf77.1	hypothetical protein	10.2674	10.4831	9.98664	9.57983	30.6965	10.1261	10.4107	9.31787	244990_s_at	P	A	A	A	P	P	P	A	10.3753	9.78324	20.4113	9.8643	0.942937	1.9673	0.950751	0.483278	1.00829
244965_at	ORF31	hypothetical protein	70.0348	77.7085	40.2244	27.8576	67.1819	44.9422	47.5048	46.5271	244965_at	P	P	P	P	P	P	A	M	73.8716	34.041	56.0621	47.0159	0.460813	0.758912	0.636455	0.838641	1.38116	2
257323_at	orf294	hypothetical protein	8.57419	7.51618	6.82108	7.31065	7.3615	7.01285	7.83536	7.26015	257323_at	P	P	P	P	P	P	A	P	8.04518	7.06587	7.18717	7.54776	0.878273	0.893351	0.938171	1.05017	1.0682
244904_at	orf275	hypothetical protein	29.0406	24.0839	25.8125	24.59	20.393	27.6652	19.6983	24.2515	244904_at	A	A	A	A	A	A	A	A	26.5623	25.2013	24.0291	21.9749	0.948762	0.904632	0.827297	0.914512	0.871975
257318_at	orf262	hypothetical protein	30.2738	26.3549	22.0087	22.0087	21.7057	27.4741	22.7848	21.7057	257318_at	P	P	P	P	P	P	P	P	28.3144	22.0087	24.5899	22.2452	0.777297	0.868459	0.785652	0.90465	1.01075
257320_at	orf251	hypothetical protein	10.1965	11.2356	12.8171	14.6213	13.2691	12.295	11.3137	14.8254	257320_at	A	A	A	A	A	A	A	A	10.716	13.7192	12.7821	13.0696	1.28025	1.1928	1.21963	1.02249	0.952647
244901_at	orf25	hypothetical protein	24.761	28.6408	26.7228	26.9087	35.0174	23.2636	24.4201	27.8576	244901_at	P	P	P	P	P	P	P	P	26.7009	26.8157	29.1405	26.1389	1.0043	1.09137	0.978951	0.896996	0.974759
244906_at	orf240a	hypothetical protein	60.9688	56.1028	53.4456	62.6829	58.4852	72.0037	49.18	50.9143	244906_at	P	P	P	P	P	P	P	P	58.5358	58.0643	65.2445	50.0472	0.991944	1.11461	0.854984	0.767071	0.861927
263505_s_at	orf215b	hypothetical protein	7.51618	8	7.67411	9.06307	8.22491	7.11074	7.21	7.1602	263505_s_at	A	P	A	P	A	A	P	A	7.75809	8.36859	7.66783	7.1851	1.07869	0.988365	0.926143	0.937046	0.85858
263060_s_at	orf215a	hypothetical protein	22.1618	21.8566	23.9176	20.2521	28.84	22.0087	20.2521	21.5557	263060_s_at	P	P	P	A	P	P	P	P	22.0092	22.0848	25.4243	20.9039	1.00344	1.15517	0.949781	0.822201	0.946528
257329_at	orf205	hypothetical protein	10.9283	10.4831	9.57983	10.0561	9.71356	10.1261	10.4831	10.8528	257329_at	P	A	A	A	A	A	P	A	10.7057	9.81797	9.91981	10.668	0.917076	0.926588	0.996474	1.07542	1.08658
257336_at	orf204	hypothetical protein	11.3924	11.0809	10.4107	12.9063	10.7034	10.9283	8.81524	9.98664	257336_at	A	M	P	P	A	A	A	P	11.2366	11.6585	10.8159	9.40094	1.03754	0.962554	0.836633	0.86918	0.806359
244916_at	orf187	hypothetical protein	7.01285	7.72749	7.26015	7.94474	7.83536	6.82108	6.23332	7.78124	244916_at	A	P	A	A	A	A	A	A	7.37017	7.60245	7.32822	7.00728	1.03152	0.994308	0.950762	0.956205	0.921714
244917_at	orf184	hypothetical protein	8.81524	8.45614	9.12611	8.81524	9.98664	9.18959	6.72717	8.39773	244917_at	A	A	A	A	A	A	A	A	8.63569	8.97068	9.58812	7.56245	1.03879	1.11029	0.87572	0.788732	0.843019
244911_at	orf170	hypothetical protein	5.38893	6.1475	5.50217	5.57897	6.6807	5.77572	5.65685	6.1475	244911_at	A	A	A	A	A	A	A	A	5.76822	5.54057	6.22821	5.90218	0.960534	1.07975	1.02322	0.947652	1.06527
244948_at	orf167	hypothetical protein	7.83536	7.56846	6.54322	7.46426	7.26015	7.21	7.51618	7.46426	244948_at	P	A	A	A	A	A	P	A	7.70191	7.00374	7.23508	7.49022	0.909351	0.939387	0.972515	1.03526	1.06946
244915_s_at	orf158	hypothetical protein	9.64646	9.57983	9.91766	10.4107	9.25351	9.98664	9.91766	10.2674	244915_s_at	A	M	A	A	A	A	A	A	9.61315	10.1642	9.62007	10.0925	1.05732	1.00072	1.04987	1.04911	0.992949
244957_at	orf157	hypothetical protein	10.9283	11.9588	11.9588	9.71356	11.7942	12.4666	11.4716	12.3805	244957_at	A	A	A	A	P	P	P	P	11.4436	10.8362	12.1304	11.9261	0.946924	1.06002	1.04217	0.983157	1.10058
244956_s_at	orf154	hypothetical protein	11.4716	11.3924	9.64646	11.2356	9.91766	10.5561	10.4107	9.31787	244956_s_at	A	P	A	P	P	P	A	A	11.432	10.441	10.2369	9.8643	0.913313	0.895455	0.862866	0.963606	0.944765
244941_at	orf153a	hypothetical protein	9.78112	10.4107	10.1261	10.7779	10.8528	10.5561	10.2674	9.31787	244941_at	P	P	A	P	P	A	P	A	10.0959	10.452	10.7044	9.79264	1.03526	1.06027	0.969959	0.914819	0.936919
244903_at	orf149	hypothetical protein	38.5859	46.2057	45.2548	42.5179	23.9176	37.7918	37.014	36.2523	244903_at	P	P	P	P	P	P	P	P	42.3958	43.8864	30.8547	36.6332	1.03516	0.727777	0.864075	1.18728	0.834727
257332_at	orf145c	hypothetical protein	10.5561	11.3137	11.8762	12.6407	11.7127	12.8171	9.51366	13.2691	257332_at	P	A	P	A	P	A	P	P	10.9349	12.2584	12.2649	11.3914	1.12104	1.12163	1.04175	0.928779	0.92927
257326_s_at	orf145b	hypothetical protein	9.38268	10.8528	10.1965	10.9283	9.12611	11.1579	8.87656	10.8528	257326_s_at	A	A	A	A	A	M	A	A	10.1178	10.5624	10.142	9.8647	1.04395	1.0024	0.974988	0.972655	0.933944
244946_at	orf143	hypothetical protein	11.0043	11.8762	11.1579	11.1579	17.5087	9.71356	9.91766	10.4831	244946_at	A	A	A	A	P	A	A	A	11.4403	11.1579	13.6111	10.2004	0.975323	1.18976	0.891623	0.749416	0.914183
244923_s_at	orf135b	orf153b orf153b	18.507	13.737	16.1113	15.1369	15.3482	18.3792	14.5203	16.7955	244923_s_at	A	A	A	A	A	P	A	A	16.122	15.6241	16.8637	15.6579	0.969115	1.046	0.971211	0.928497	1.00216
244942_at	orf131	hypothetical protein	11.9588	11.6318	11.3137	11.7127	9.71356	12.9063	10.3388	12.295	244942_at	A	A	A	A	A	A	A	A	11.7953	11.5132	11.3099	11.3169	0.976085	0.95885	0.959444	1.00062	0.982951
244955_at	orf127	hypothetical protein	7.72749	8	7.6211	7.6211	6.86852	7.6211	7.21	8	244955_at	P	A	A	A	A	A	P	P	7.86375	7.6211	7.24481	7.605	0.969144	0.921293	0.967097	1.04972	0.997887
244905_at	orf122c	hypothetical protein	8.33973	8.9383	8	9.12611	9.06307	7.72749	8.57419	8.81524	244905_at	A	A	P	P	P	A	P	P	8.63901	8.56305	8.39528	8.69471	0.991208	0.971787	1.00645	1.03567	1.01538
244913_at	orf121b	hypothetical protein	13.6422	11.3924	12.3805	10.6295	13.0864	11.7942	9.98664	10.2674	244913_at	A	A	A	A	P	A	A	A	12.5173	11.505	12.4403	10.127	0.91913	0.99385	0.809044	0.81405	0.880228
244947_at	orf121a	hypothetical protein	7.6211	8.22491	7.56846	11.3924	8.45614	8.57419	6.86852	8.69388	244947_at	A	P	A	P	P	A	A	P	7.92301	9.48043	8.51517	7.7812	1.19657	1.07474	0.982102	0.913805	0.820764
244907_at	orf120	hypothetical protein	7.83536	6.02099	7.46426	7.4127	7.11074	7.31065	7.46426	8	244907_at	A	A	A	A	A	A	A	A	6.92817	7.43848	7.2107	7.73213	1.07366	1.04078	1.11604	1.07231	1.03948
244910_s_at	orf119	hypothetical protein	8.39773	8.33973	7.83536	8.63383	9.18959	8.39773	7.3615	8	244910_s_at	A	A	A	P	A	A	P	A	8.36873	8.23459	8.79366	7.68075	0.983972	1.05078	0.917792	0.873442	0.932742
244922_s_at	orf118	hypothetical protein	9.84916	9.25351	8.33973	9.57983	8.75435	8.22491	8.1681	8.81524	244922_s_at	P	A	A	P	A	A	P	P	9.55133	8.95978	8.48963	8.49167	0.938066	0.888843	0.889056	1.00024	0.947754
244949_at	orf116	hypothetical protein	11.7127	9.12611	9.25351	10.1261	10.6295	10.4107	8.33973	9.18959	244949_at	A	A	A	A	P	A	A	P	10.4194	9.68978	10.5201	8.76466	0.929975	1.00967	0.841186	0.833133	0.904526
244921_s_at	orf114	hypothetical protein	19.1597	16.2234	15.455	15.1369	14.5203	16.9123	15.455	14.0257	244921_s_at	P	P	P	P	P	A	P	P	17.6915	15.296	15.7163	14.7403	0.864593	0.888353	0.833187	0.937901	0.963676
257325_at	orf113	hypothetical protein	25.6342	23.2636	19.4271	22.3159	26.7228	28.6408	19.8353	19.4271	257325_at	P	P	A	P	P	P	A	A	24.4489	20.8715	27.6818	19.6312	0.853679	1.13223	0.802949	0.709174	0.940575
257334_at	orf111d	hypothetical protein	125.366	127.116	89.8845	102.537	179.769	107.635	106.153	83.2859	257334_at	P	P	P	P	P	P	P	P	126.241	96.2107	143.702	94.7194	0.76212	1.13832	0.750307	0.659138	0.984499
257330_at	orf111c	hypothetical protein	11.2356	10.0561	10.7779	11.3137	25.1067	10.8528	10.8528	11.6318	257330_at	A	A	A	A	P	P	P	P	10.6458	11.0458	17.9798	11.2423	1.03757	1.6889	1.05603	0.625276	1.01779
257322_at	orf111b	hypothetical protein	14.5203	11.3137	10.4107	11.3924	19.8353	12.5533	10.8528	11.1579	257322_at	P	P	P	P	P	P	P	P	12.917	10.9016	16.1943	11.0054	0.84397	1.25372	0.852008	0.679583	1.00952
244931_at	orf110b	hypothetical protein	7.3615	7.83536	6.9644	7.31065	9.84916	8.69388	6.86852	6.6807	244931_at	A	A	A	P	P	A	A	A	7.59843	7.13753	9.27152	6.77461	0.939342	1.22019	0.89158	0.730691	0.949154
244954_s_at	orf110a	hypothetical protein	8.22491	7.6211	7.94474	7.1602	7.94474	6.82108	7.31065	6.36429	244954_s_at	A	A	A	A	A	A	A	A	7.92301	7.55247	7.38291	6.83747	0.953233	0.931832	0.862989	0.926122	0.905329
244927_at	orf109	hypothetical protein	9.25351	9.84916	10.9283	10.3388	10.4831	11.2356	8.28212	11.9588	244927_at	P	A	A	A	P	P	A	P	9.55133	10.6336	10.8594	10.1205	1.11331	1.13695	1.05959	0.931958	0.951746
257331_at	orf107h	hypothetical protein	15.3482	16	17.3878	16.9123	16.2234	16	16	17.3878	257331_at	P	P	P	P	P	P	P	P	15.6741	17.15	16.1117	16.6939	1.09416	1.02792	1.06506	1.03614	0.973403
257317_at	orf107g	hypothetical protein	11.3924	11.6318	11.5514	11.5514	22.4711	11.8762	10.4831	9.38268	257317_at	P	A	A	A	P	A	P	A	11.5121	11.5514	17.1737	9.93291	1.00342	1.49179	0.862824	0.578381	0.859886
244924_at	orf107f	hypothetical protein	15.0324	12.7286	13.1775	11.4716	23.2636	12.042	11.3137	12.3805	244924_at	P	A	P	A	P	P	P	P	13.8805	12.3245	17.6528	11.8471	0.887906	1.27177	0.853509	0.671119	0.961261
244914_at	orf107e	hypothetical protein	7.46426	6.82108	7.06162	7.01285	7.4127	7.4127	6.1475	7.11074	244914_at	A	A	A	A	A	A	A	A	7.14267	7.03723	7.4127	6.62912	0.985238	1.03781	0.928101	0.894292	0.942007
244908_at	orf107d	hypothetical protein	8.39773	7.6211	7.31065	8.33973	7.94474	7.88986	6.86852	7.83536	244908_at	A	A	A	A	A	A	A	A	8.00942	7.82519	7.9173	7.35194	0.976998	0.988499	0.917912	0.928592	0.939523
244959_s_at	orf107c	hypothetical protein	23.1029	22.9433	19.6983	21.8566	25.8125	16.9123	18.507	17.2677	244959_s_at	P	P	P	P	P	P	P	P	23.0231	20.7775	21.3624	17.8873	0.902463	0.92787	0.776931	0.837327	0.8609
257321_at	orf106f	hypothetical protein	18.0009	17.5087	14.3204	16.9123	12.1257	18.2522	17.0299	16.7955	257321_at	P	A	P	P	A	P	P	A	17.7548	15.6163	15.189	16.9127	0.879555	0.855485	0.952569	1.11348	1.08301
244918_at	orf106d	hypothetical protein	7.31065	7.46426	6.9644	6.72717	7.3615	7.88986	7.67411	7.6211	244918_at	P	P	A	A	A	A	A	A	7.38746	6.84579	7.62568	7.64761	0.926677	1.03225	1.03522	1.00288	1.11713
244930_at	orf106c	hypothetical protein	8.1681	7.51618	6.82108	6.54322	6.54322	7.21	6.9644	7.26015	244930_at	P	P	A	A	A	P	A	P	7.84214	6.68215	6.87661	7.11228	0.852082	0.876879	0.906931	1.03427	1.06437
244958_at	orf106b	hypothetical protein	12.7286	11.5514	11.1579	12.042	12.295	14.0257	10.4831	12.9063	244958_at	P	P	P	P	A	P	A	P	12.14	11.6	13.1603	11.6947	0.955515	1.08405	0.96332	0.888632	1.00817
257335_at	orf105b	hypothetical protein	8.87656	8.87656	9.18959	8.81524	11.1579	9.51366	8.51496	9.12611	257335_at	A	P	P	A	P	P	P	P	8.87656	9.00241	10.3358	8.82054	1.01418	1.16439	0.993689	0.853396	0.979797
257319_at	orf105a	hypothetical protein	16.5642	16.7955	17.0299	24.2515	21.8566	20.393	16.5642	17.6305	257319_at	P	P	P	P	P	P	P	P	16.6799	20.6407	21.1248	17.0974	1.23746	1.26649	1.02503	0.80935	0.828333
257328_s_at	orf102	hypothetical protein	12.042	10.5561	10.2674	11.5514	11.8762	10.1965	9.31787	10.4107	257328_s_at	P	A	A	A	A	A	P	A	11.299	10.9094	11.0363	9.8643	0.965519	0.976752	0.873023	0.893802	0.9042
257324_at	orf101b	hypothetical protein	35.0174	32	30.4844	31.5594	48.1679	31.125	26.9087	23.5883	257324_at	P	A	P	A	P	P	P	P	33.5087	31.0219	39.6464	25.2485	0.925787	1.18317	0.753491	0.636842	0.813892
244952_at	orf101a	hypothetical protein	8.33973	8	8.63383	7.78124	8.63383	9.12611	7.01285	8	244952_at	M	P	P	A	P	P	P	P	8.16986	8.20753	8.87997	7.50642	1.00461	1.08692	0.918794	0.845321	0.914577
257327_at	orf100c	hypothetical protein	13.2691	13.6422	13.8326	13.8326	12.996	15.5625	10.7034	10.4831	257327_at	A	A	A	A	A	A	A	A	13.4556	13.8326	14.2793	10.5933	1.02802	1.06121	0.787275	0.741865	0.76582
244909_at	orf100a	hypothetical protein	10.0561	8.51496	8	11.1579	10.7034	9.91766	7.67411	11.3924	244909_at	P	P	A	P	P	A	P	P	9.28553	9.57897	10.3105	9.53326	1.0316	1.11039	1.02668	0.924613	0.995227
245010_at	ndhJ	NADH dehydrogenase subunit	199.466	252.476	126.238	101.829	206.5	124.5	128.89	119.428	245010_at	P	P	P	P	P	P	P	P	225.971	114.033	165.5	124.159	0.504637	0.732396	0.549448	0.750207	1.0888
244935_at	ndhI	NADH dehydrogenase subunit	6700.25	7033.37	6295.04	6338.83	9607.86	6700.25	6382.92	6338.83	244935_at	P	P	P	P	P	P	P	P	6866.81	6316.93	8154.06	6360.87	0.919922	1.18746	0.926321	0.780087	1.00696
244937_at	ndhH	NADH dehydrogenase 49KDa protein	29.0406	25.1067	21.8566	22.0087	18.6357	26.1729	22.9433	25.1067	244937_at	P	P	P	P	P	P	P	P	27.0737	21.9327	22.4043	24.025	0.810111	0.827532	0.887394	1.07234	1.0954
244934_at	ndhG	NADH dehydrogenase ND6	150.123	160.898	98.36	91.7731	212.306	151.167	119.428	113.772	244934_at	P	P	P	P	P	P	P	P	155.51	95.0666	181.736	116.6	0.61132	1.16865	0.74979	0.641589	1.22651
244994_at	ndhF	NADH dehydrogenase ND5	7.83536	7.88986	6.63456	6.23332	21.8566	6.82108	7.11074	7.67411	244994_at	A	A	A	A	A	A	A	A	7.86261	6.43394	14.3389	7.39243	0.818295	1.82368	0.9402	0.515552	1.14897
244933_at	ndhE	NADH dehydrogenase ND4L	37.014	42.5179	23.9176	23.7524	85.6274	28.0514	31.779	31.3414	244933_at	P	P	P	A	P	P	P	P	39.766	23.835	56.8394	31.5602	0.599381	1.42935	0.793648	0.555253	1.32411
244962_at	ndhD	NADH dehydrogenase ND4	1260.69	1398.83	935.763	704.277	1478.58	1016.93	781.445	879.171	244962_at	P	P	P	P	P	P	P	P	1329.76	820.02	1247.76	830.308	0.616669	0.938332	0.624405	0.665441	1.01255
245012_at	ndhC	NADH dehydrogenase D3	2005.85	1884.54	1652	1770.57	1795.29	1795.29	1640.59	1663.49	245012_at	P	P	P	P	P	P	P	P	1945.2	1711.29	1795.29	1652.04	0.879749	0.922933	0.849292	0.92021	0.96538
244991_s_at	ndhB.1	NADH dehydrogenase ND2	13.4543	13.6422	11.9588	11.3137	13.6422	13.8326	11.3924	11.8762	244991_s_at	P	P	P	A	P	P	P	P	13.5483	11.6363	13.7374	11.6343	0.858875	1.01396	0.85873	0.846908	0.999832
244936_at	ndhA	NADH dehydrogenase ND1	2241.11	2210.26	1770.57	1618	2120.22	2194.99	2005.85	1833.01	244936_at	P	P	P	P	P	P	P	P	2225.69	1694.29	2157.61	1919.43	0.761243	0.969412	0.8624	0.889611	1.13288
244943_at	nad9	NADH dehydrogenase subunit 9	64.4452	54.1917	48.8403	58.0812	94.3532	59.3016	53.0765	48.1679	244943_at	P	P	P	P	P	P	P	P	59.3184	53.4608	76.8274	50.6222	0.90125	1.29517	0.853397	0.658908	0.946903
244925_at	nad7	NADH dehydrogenase subunit 7	14.8254	11.2356	11.0043	13.0864	14.723	11.8762	10.4831	11.8762	244925_at	P	P	A	P	P	P	P	P	13.0305	12.0454	13.2996	11.1797	0.9244	1.02065	0.857963	0.840602	0.928129
244953_s_at	nad6	NADH dehydrogenase subunit 6	9.25351	8.63383	9.31787	12.6407	11.5514	9.00047	8.81524	11.5514	244953_s_at	M	P	P	P	P	A	P	P	8.94367	10.9793	10.276	10.1833	1.2276	1.14896	1.13861	0.990987	0.927506
257337_at	nad5.2	NADH dehydrogenase subunit 5 (nad5) (trans-splicing part 2 of 2)	14.42	11.2356	13.2691	13.9288	15.1369	13.4543	11.0809	11.6318	257337_at	P	P	P	P	P	P	P	P	12.8278	13.599	14.2956	11.3563	1.06012	1.11443	0.885292	0.794391	0.835088
257338_s_at	nad5.1	NADH dehydrogenase subunit 5 (nad5) (trans-splicing part 1 of 2)	14.0257	14.9285	12.3805	17.0299	13.3614	13.4543	13.2691	13.4543	257338_s_at	P	P	P	P	P	P	P	P	14.4771	14.7052	13.4079	13.3617	1.01576	0.926143	0.922955	0.996558	0.908638
244902_at	nad4L	NADH dehydrogenase subunit 4L	28.6408	30.91	24.59	23.2636	27.4741	23.4254	19.4271	24.2515	244902_at	P	P	P	P	P	P	P	P	29.7754	23.9268	25.4497	21.8393	0.803576	0.854724	0.733468	0.858134	0.912755
244929_at	nad4	NADH dehydrogenase subunit 4	188.706	210.839	178.527	122.786	164.279	141.044	136.239	125.366	244929_at	P	P	P	P	M	P	M	P	199.773	150.656	152.661	130.803	0.754139	0.764174	0.654756	0.856816	0.868217
244920_s_at	nad3	NADH dehydrogenase subunit 3 Protein sequence is in conflict with the conceptual translation	91.1392	76.6386	58.892	64.4452	54.9482	70.0348	54.5686	67.1819	244920_s_at	P	P	P	P	P	M	P	P	83.8889	61.6686	62.4915	60.8753	0.735122	0.744931	0.725665	0.974137	0.987136
257339_s_at	mitochondria.1	ATP synthase subunit 9	106.153	104.691	89.8845	117.784	110.661	101.125	101.125	109.896	257339_s_at	P	P	P	P	P	P	P	P	105.422	103.834	105.893	105.511	0.984937	1.00447	1.00084	0.996391	1.01615
244926_s_at	matR	maturase	15.8895	16.5642	14.8254	14.9285	11.7942	13.4543	13.5479	15.2422	244926_s_at	A	A	A	A	A	A	A	A	16.2269	14.877	12.6242	14.3951	0.916811	0.777985	0.887114	1.14027	0.967608
245048_at	matK	orf within trnK intron orf within trnK intron	424.612	512	324.034	349.706	797.865	352.139	333.144	337.794	245048_at	P	P	P	P	P	P	P	P	468.306	336.87	575.002	335.469	0.719338	1.22783	0.716346	0.583422	0.99584
244950_at	cox2	cytochrome c oxidase subunit 2	49.8665	60.5477	45.5696	41.9326	28.84	49.8665	42.5179	43.7133	244950_at	P	P	P	P	P	P	P	P	55.2071	43.7511	39.3533	43.1156	0.79249	0.71283	0.780979	1.0956	0.985475
257333_at	cox1	cytochrome c oxidase subunit 1	104.691	123.64	113.772	112.206	137.187	104.691	111.43	95.0095	257333_at	P	P	P	P	P	P	P	P	114.166	112.989	120.939	103.22	0.989691	1.05933	0.904125	0.853486	0.913543
244971_at	clpP	ATP-dependent protease subunit	1640.59	1652	1398.83	1067.48	1509.65	1305.15	1332.57	1370.04	244971_at	P	P	P	P	P	P	P	P	1646.3	1233.16	1407.4	1351.31	0.749048	0.854889	0.820816	0.960143	1.09581
244951_s_at	ccb452	cytochrome c biogenesis orf452	117.784	116.162	98.36	99.0442	75.0614	99.0442	79.8932	89.2636	244951_s_at	P	P	P	P	P	P	P	P	116.973	98.7021	87.0528	84.5784	0.843801	0.744211	0.723057	0.971576	0.856906
244912_at	ccb382	cytochrome c biogenesis orf382 Protein sequence is in conflict with the conceptual translation	100.427	97.0059	91.7731	69.551	45.2548	72.5046	72.0037	68.5935	244912_at	P	P	P	P	P	P	P	P	98.7163	80.6621	58.8797	70.2986	0.81711	0.596454	0.712128	1.19394	0.87152
244945_at	ccb206	cytochrome c biogenesis orf206	14.42	16.7955	12.7286	14.6213	20.1122	18.0009	11.7127	12.8171	244945_at	P	P	A	P	P	P	P	P	15.6077	13.6749	19.0566	12.2649	0.876164	1.22097	0.785822	0.643605	0.896889
244919_at	ccb203	cytochrome c biogenesis orf203 Protein sequence is in conflict with the conceptual translation	12.2101	12.9063	14.5203	13.1775	8.87656	16.1113	11.7942	14.3204	244919_at	A	A	A	A	A	A	A	A	12.5582	13.8489	12.4939	13.0573	1.10278	0.994884	1.03974	1.04509	0.94284
244995_at	atpI	ATPase a subunit	12.5533	16.6795	11.3924	10.3388	18.2522	10.7779	12.9063	11.3137	244995_at	A	P	P	P	P	P	P	P	14.6164	10.8656	14.515	12.11	0.743385	0.993066	0.828521	0.834306	1.11452
245026_at	atpH	ATPase III subunit	172.446	218.275	116.97	120.259	112.986	129.787	126.238	158.683	245026_at	P	P	P	P	P	P	P	P	195.36	118.615	121.386	142.46	0.607159	0.621347	0.729218	1.17361	1.20103
245025_at	atpF	ATPase I subunit	86.8227	119.428	60.1295	56.493	70.5219	65.3448	65.3448	74.5429	245025_at	P	P	P	P	P	P	P	P	103.125	58.3112	67.9334	69.9439	0.56544	0.658745	0.678241	1.0296	1.19949
245013_at	atpE	ATPase epsilon subunit	6080.61	6608.01	5873.48	5113.16	9089.59	5673.41	5480.15	5480.15	245013_at	P	P	P	P	P	P	P	P	6344.31	5493.32	7381.5	5480.15	0.865866	1.16348	0.86379	0.742417	0.997603
245014_at	atpB	ATPase beta subunit	7131.55	7281.4	6517.03	6122.9	5955.47	6382.92	6653.97	6700.25	245014_at	P	P	P	P	P	P	P	P	7206.47	6319.97	6169.19	6677.11	0.876985	0.856063	0.926544	1.08233	1.05651
245024_at	atpA	ATPase alpha subunit	955.426	1002.93	552.565	436.549	617.374	572.051	541.193	530.056	245024_at	P	P	P	P	P	P	P	P	979.176	494.557	594.712	535.624	0.505075	0.60736	0.547015	0.900645	1.08304
247014_at	At5g67630	P-loop containing nucleoside triphosphate hydrolases superfamily protein; FUNCTIONS IN: DNA helicase activity, nucleoside-triphosphatase activity, nucleotide binding, ATP binding; LOCATED IN: nucleolus, chloroplast; EXPRESSED IN: 21 plant structures; EXPRESSED DURING: 13 growth stages; CONTAINS InterPro DOMAIN/s: TIP49, C-terminal (InterPro:IPR010339), ATPase, AAA+ type, core (InterPro:IPR003593)…	53.8174	39.6706	46.8507	49.18	64	48.8403	50.5626	48.1679	247014_at	P	P	P	P	P	P	P	P	46.744	48.0154	56.4201	49.3653	1.0272	1.207	1.05608	0.874958	1.02811
247009_at	At5g67600	unknown protein; LOCATED IN: plasma membrane; EXPRESSED IN: 22 plant structures; EXPRESSED DURING: 13 growth stages; BEST Arabidopsis thaliana protein match is: unknown protein (TAIR:AT3G49845.1); Has 30201 Blast hits to 17322 proteins in 780 species: Archae - 12; Bacteria - 1396; Metazoa - 17338; Fungi - 3422; Plants - 5037; Viruses - 0; Other Eukaryotes - 2996 (source: NCBI BLink).	962.071	916.506	643.591	781.445	770.686	910.175	922.88	1060.11	247009_at	P	P	P	P	P	P	P	P	939.288	712.518	840.431	991.496	0.758572	0.894752	1.05558	1.17975	1.39154
247011_at	At5g67590	Mutant leaves have a reduced capacity for cold acclimation, appear water-soaked, leak electrolytes, and accumulate reactive oxygen species constitutively. Encode a protein with high similarity to the 18-kD Fe-S subunit of complex I (NADH dehydrogenase, EC 1.6.5.3) in the mitochondrial electron transfer chain.	380.038	367.093	415.873	413.001	380.038	407.315	448.822	404.501	247011_at	P	P	P	P	P	P	P	P	373.565	414.437	393.676	426.662	1.10941	1.05384	1.14213	1.08379	1.0295
247012_at	At5g67580	Encodes a telomeric DNA binding protein. In vitro, the protein preferentially binds double-stranded telomeric repeats, but it can also bind to the single G-rich telomeric strand.	62.6829	57.2816	58.4852	51.6251	70.5219	62.2499	64	59.7141	247012_at	P	P	P	P	P	P	P	P	59.9823	55.0551	66.3859	61.8571	0.917857	1.10676	1.03126	0.93178	1.12355
247004_at	At5g67570	Encodes a pentratricopeptide repeat containing protein that is targeted to the chloroplast. Mutants have pale young leave and reduced accumulation of plastid encoded transcripts suggesting a role for DG1 in regulation of plastid gene expression.	11.1579	10.6295	8.81524	9.31787	7.46426	10.4831	10.6295	10.4831	247004_at	A	A	P	A	A	A	P	P	10.8937	9.06655	8.97371	10.5563	0.832274	0.82375	0.969028	1.17636	1.16431
247008_at	At5g67560	A member of ARF-like GTPase family. A thaliana has 21 members, in two subfamilies, ARF and ARF-like (ARL) GTPases.	296.112	306.555	278.204	268.727	306.555	300.246	298.172	317.365	247008_at	P	P	P	P	P	P	P	P	301.333	273.466	303.4	307.768	0.907519	1.00686	1.02136	1.0144	1.12544
247003_at	At5g67550	unknown protein; FUNCTIONS IN: molecular_function unknown; INVOLVED IN: biological_process unknown; LOCATED IN: endomembrane system; EXPRESSED IN: flower; EXPRESSED DURING: 4 anthesis; BEST Arabidopsis thaliana protein match is: unknown protein (TAIR:AT1G71110.1); Has 161 Blast hits to 154 proteins in 16 species: Archae - 0; Bacteria - 0; Metazoa - 0; Fungi - 0; Plants - 161; Viruses - 0; Other E…	11.3924	9.31787	9.38268	9.51366	10.8528	8.87656	9.84916	8.45614	247003_at	P	A	A	A	A	A	A	A	10.3551	9.44817	9.8647	9.15265	0.912414	0.952638	0.883875	0.927819	0.968722
246980_at	At5g67530	plant U-box 49 (PUB49); FUNCTIONS IN: ubiquitin-protein ligase activity, peptidyl-prolyl cis-trans isomerase activity; INVOLVED IN: protein folding, protein ubiquitination; LOCATED IN: ubiquitin ligase complex; EXPRESSED IN: 24 plant structures; EXPRESSED DURING: 13 growth stages; CONTAINS InterPro DOMAIN/s: Cyclophilin-like (InterPro:IPR015891), Peptidyl-prolyl cis-trans isomerase, cyclophilin-t…	141.044	140.07	135.298	137.187	106.891	130.69	152.219	137.187	246980_at	P	P	P	P	P	P	P	P	140.557	136.243	118.79	144.703	0.969307	0.845142	1.0295	1.21814	1.0621
247005_at	At5g67520	Provides activated sulfate for the sulfation of secondary metabolites, including the glucosinolates. Redundant with APK3.	294.067	319.573	270.597	243.875	407.315	326.288	259.574	184.823	247005_at	P	P	P	P	P	P	P	P	306.82	257.236	366.801	222.198	0.838395	1.19549	0.724198	0.605773	0.863792
247010_at	At5g67510	Translation protein SH3-like family protein; FUNCTIONS IN: structural constituent of ribosome, protein binding; INVOLVED IN: translation; LOCATED IN: cytosolic ribosome, cytosolic large ribosomal subunit, large ribosomal subunit; EXPRESSED IN: 23 plant structures; EXPRESSED DURING: 13 growth stages; CONTAINS InterPro DOMAIN/s: Translation protein SH3-like (InterPro:IPR008991), Ribosomal protein L…	229.126	225.972	302.334	252.476	131.599	263.197	328.557	247.28	247010_at	P	P	P	P	P	P	P	P	227.549	277.405	197.398	287.918	1.2191	0.867495	1.2653	1.45857	1.0379
247007_at	At5g67500	Encodes a voltage-dependent anion channel (VDAC: AT3G01280/VDAC1, AT5G67500/VDAC2, AT5G15090/VDAC3, AT5G57490/VDAC4, AT5G15090/VDAC5). VDACs are reported to be porin-type, beta-barrel diffusion pores. They are prominently localized in the outer mitochondrial membrane and are involved in metabolite exchange between the organelle and the cytosol.	210.839	242.191	290.018	200.854	263.197	256	257.781	225.972	247007_at	P	P	P	P	P	P	P	P	226.515	245.436	259.599	241.876	1.08353	1.14605	1.06782	0.931732	0.985497
247006_at	At5g67490	unknown protein; CONTAINS InterPro DOMAIN/s: Protein of unknown function DUF1674 (InterPro:IPR012875); Has 30201 Blast hits to 17322 proteins in 780 species: Archae - 12; Bacteria - 1396; Metazoa - 17338; Fungi - 3422; Plants - 5037; Viruses - 0; Other Eukaryotes - 2996 (source: NCBI BLink).	265.028	256	263.197	306.555	120.259	263.197	245.572	254.232	247006_at	P	P	P	P	P	P	P	P	260.514	284.876	191.728	249.902	1.09351	0.735961	0.959264	1.30342	0.87723
247013_at	At5g67480	BTB and TAZ domain protein. Located in cytoplasm and expressed in fruit, flower and leaves.	374.806	324.034	474.413	250.732	306.555	270.597	385.343	219.793	247013_at	P	P	P	P	P	P	P	P	349.42	362.572	288.576	302.568	1.03764	0.825871	0.865915	1.04849	0.834504
246995_at	At5g67470	formin homolog 6 (FH6); FUNCTIONS IN: actin binding; INVOLVED IN: cellular component organization, actin cytoskeleton organization; LOCATED IN: in 7 components; EXPRESSED IN: 23 plant structures; EXPRESSED DURING: 13 growth stages; CONTAINS InterPro DOMAIN/s: Actin-binding FH2/DRF autoregulatory (InterPro:IPR003104), Actin-binding FH2 (InterPro:IPR015425); BEST Arabidopsis thaliana protein match …	21.1121	31.779	24.9333	21.259	40.2244	19.4271	26.9087	28.443	246995_at	P	P	P	P	P	P	P	P	26.4455	23.0961	29.8258	27.6758	0.873346	1.12782	1.04652	0.927916	1.19829
246994_at	At5g67460	O-Glycosyl hydrolases family 17 protein; FUNCTIONS IN: cation binding, hydrolase activity, hydrolyzing O-glycosyl compounds, catalytic activity; INVOLVED IN: carbohydrate metabolic process; LOCATED IN: endomembrane system; EXPRESSED IN: 21 plant structures; EXPRESSED DURING: 13 growth stages; CONTAINS InterPro DOMAIN/s: X8 (InterPro:IPR012946), Glycoside hydrolase, catalytic core (InterPro:IPR017…	19.1597	20.9663	19.0273	23.9176	22.7848	21.259	17.5087	22.0087	246994_at	A	A	A	A	A	A	A	P	20.063	21.4725	22.0219	19.7587	1.07025	1.09764	0.984833	0.897229	0.920188
246993_at	At5g67450	Encodes zinc-finger protein. mRNA levels are elevated in response to low temperature, cold temperatures and high salt. The protein is localized to the nucleus and acts as a transcriptional repressor.	10.8528	10.2674	15.0324	13.0864	11.9588	11.7942	13.3614	19.0273	246993_at	A	P	A	A	A	A	P	P	10.5601	14.0594	11.8765	16.1944	1.33137	1.12465	1.53354	1.36357	1.15185
246999_at	At5g67440	A member of the NPY gene family (NPY1/AT4G31820, NPY2/AT2G14820, NPY3/AT5G67440, NPY4/AT2G23050, NPY5/AT4G37590). Involved in auxin-mediated organogenesis.	62.6829	54.5686	61.8199	56.1028	48.5029	58.4852	62.6829	56.1028	246999_at	P	P	P	P	P	P	P	P	58.6258	58.9613	53.4941	59.3928	1.00572	0.912467	1.01308	1.11027	1.00732
246992_at	At5g67430	Acyl-CoA N-acyltransferases (NAT) superfamily protein; FUNCTIONS IN: N-acetyltransferase activity; INVOLVED IN: metabolic process; LOCATED IN: cellular_component unknown; CONTAINS InterPro DOMAIN/s: GCN5-related N-acetyltransferase, C-terminal (InterPro:IPR022610), GCN5-related N-acetyltransferase (InterPro:IPR000182), Acyl-CoA N-acyltransferase (InterPro:IPR016181); BEST Arabidopsis thaliana pro…	11.6318	10.4831	10.6295	11.1579	9.78112	10.8528	9.38268	10.8528	246992_at	A	A	A	A	A	A	A	A	11.0575	10.8937	10.317	10.1178	0.985191	0.933033	0.915016	0.98069	0.92877
246996_at	At5g67420	Encodes a LOB-domain protein involved in nitrogen metabolism and affecting leaf morphogenesis.	10.8528	11.7127	14.3204	12.996	15.3482	12.6407	12.042	11.1579	246996_at	A	A	P	A	A	A	A	A	11.2828	13.6582	13.9944	11.6	1.21054	1.24034	1.02811	0.828898	0.849303
246991_at	At5g67400	root hair specific 19 (RHS19); FUNCTIONS IN: peroxidase activity, heme binding; INVOLVED IN: oxidation reduction, response to oxidative stress; LOCATED IN: endomembrane system; EXPRESSED IN: root hair, root; CONTAINS InterPro DOMAIN/s: Haem peroxidase (InterPro:IPR010255), Plant peroxidase (InterPro:IPR000823), Peroxidases heam-ligand binding site (InterPro:IPR019793), Haem peroxidase, plant/fung…	10.4831	10.7779	10.8528	9.71356	10.5561	11.0809	10.7034	10.4831	246991_at	A	A	A	A	A	A	A	A	10.6305	10.2832	10.8185	10.5933	0.967329	1.01768	0.996498	0.979185	1.03015
246997_at	At5g67390	unknown protein; BEST Arabidopsis thaliana protein match is: Plant protein of unknown function (DUF863) (TAIR:AT1G69360.1); Has 1807 Blast hits to 1807 proteins in 277 species: Archae - 0; Bacteria - 0; Metazoa - 736; Fungi - 347; Plants - 385; Viruses - 0; Other Eukaryotes - 339 (source: NCBI BLink).	40.2244	52.7098	29.8571	33.5909	26.1729	39.1245	26.3549	23.7524	246997_at	P	P	P	P	P	P	P	P	46.4671	31.724	32.6487	25.0536	0.682719	0.702619	0.539169	0.767371	0.789738
247000_at	At5g67380	Casein kinase II (CK2) catalytic subunit (alpha 1). One known substrate of CK2 is Phytochrome Interacting Factor 1 (PIF1). CK2-mediated phosphorylation enhances the light-induced degradation of PIF1 to promote photomorphogenesis.	192.672	188.706	184.823	179.769	263.197	199.466	187.403	184.823	247000_at	P	P	P	P	P	P	P	P	190.689	182.296	231.332	186.113	0.955986	1.21314	0.976002	0.804529	1.02094
246998_at	At5g67370	Protein of unknown function (DUF1230); CONTAINS InterPro DOMAIN/s: Protein of unknown function DUF1230 (InterPro:IPR009631); BEST Arabidopsis thaliana protein match is: Protein of unknown function (DUF1230) (TAIR:AT5G11840.1); Has 1807 Blast hits to 1807 proteins in 277 species: Archae - 0; Bacteria - 0; Metazoa - 736; Fungi - 347; Plants - 385; Viruses - 0; Other Eukaryotes - 339 (source: NCBI B…	137.187	168.897	111.43	121.095	125.366	147.033	111.43	109.137	246998_at	P	P	P	P	P	P	P	P	153.042	116.263	136.2	110.284	0.75968	0.889949	0.720612	0.809722	0.948573
246990_at	At5g67360	Encodes a subtilisin-like serine protease essential for mucilage release from seed coats.	218.275	290.018	181.019	190.019	86.2229	210.839	173.645	194.012	246990_at	P	P	P	P	P	P	P	P	254.146	185.519	148.531	183.829	0.72997	0.584431	0.723317	1.23764	0.990887
246989_at	At5g67350	unknown protein; Has 1807 Blast hits to 1807 proteins in 277 species: Archae - 0; Bacteria - 0; Metazoa - 736; Fungi - 347; Plants - 385; Viruses - 0; Other Eukaryotes - 339 (source: NCBI BLink).	54.5686	46.8507	41.6429	36.0019	21.4068	39.9466	41.3553	44.0173	246989_at	P	P	P	P	P	P	P	P	50.7097	38.8224	30.6767	42.6863	0.765582	0.604948	0.841778	1.39149	1.09953
246988_at	At5g67340	ARM repeat superfamily protein; FUNCTIONS IN: ubiquitin-protein ligase activity, binding; INVOLVED IN: protein ubiquitination; LOCATED IN: endomembrane system, ubiquitin ligase complex; EXPRESSED IN: 11 plant structures; EXPRESSED DURING: 7 growth stages; CONTAINS InterPro DOMAIN/s: U box domain (InterPro:IPR003613), Armadillo-like helical (InterPro:IPR011989), Armadillo (InterPro:IPR000225), Arm…	45.8866	48.8403	36.7583	49.18	26.9087	62.6829	46.2057	70.5219	246988_at	P	P	P	P	P	P	P	P	47.3634	42.9692	44.7958	58.3638	0.907223	0.945789	1.23226	1.30289	1.35827
247001_at	At5g67330	Encodes a member of the Nramp2 metal transporter family; like its homolog Atnramp3, localized in vacuolar membrane. Seedlings of double mutant, atnramp3-1 atnramp4-1, were arrested at early germination.	359.538	451.944	436.549	407.315	512	369.646	372.217	315.173	247001_at	P	P	P	P	P	P	P	P	405.741	421.932	440.823	343.695	1.0399	1.08646	0.84708	0.779667	0.814575
247002_at	At5g67320	Encodes a WD-40 protein involved in histone deacetylation in response to abiotic stress.Identified in a screen for mutations with altered expression of stress induced genes. Functions as a repressor of cold tolerance induced genes. Loss of function mutants are hypersensitive to freezing.	93.7015	90.5097	85.6274	75.0614	78.7932	82.1393	83.2859	73.0089	247002_at	P	P	P	P	P	P	P	P	92.1056	80.3444	80.4662	78.1474	0.872308	0.873631	0.848454	0.971182	0.972655
246984_at	At5g67310	member of CYP81G	29.2426	23.5883	25.8125	22.3159	55.3304	23.1029	22.4711	15.5625	246984_at	P	P	P	P	P	P	P	P	26.4155	24.0642	39.2166	19.0168	0.91099	1.48461	0.719912	0.484917	0.790252
246987_at	At5g67300	Member of the R2R3 factor MYB gene family involved in mediating plant responses to a variety of abiotic stimiuli.	317.365	487.751	630.346	1128.35	448.822	1341.84	879.171	1305.15	246987_at	P	P	P	P	P	P	P	P	402.558	879.348	895.332	1092.16	2.1844	2.22411	2.71305	1.21984	1.24201
246985_at	At5g67290	FAD-dependent oxidoreductase family protein; FUNCTIONS IN: oxidoreductase activity; INVOLVED IN: biological_process unknown; LOCATED IN: cellular_component unknown; EXPRESSED IN: 22 plant structures; EXPRESSED DURING: 13 growth stages; CONTAINS InterPro DOMAIN/s: FAD dependent oxidoreductase (InterPro:IPR006076); Has 1807 Blast hits to 1807 proteins in 277 species: Archae - 0; Bacteria - 0; Metaz…	127.116	117.784	125.366	106.153	94.3532	116.162	113.772	115.36	246985_at	P	P	P	P	P	P	P	P	122.45	115.759	105.258	114.566	0.945361	0.859599	0.935615	1.08843	0.989691
246986_at	At5g67280	receptor-like kinase (RLK); FUNCTIONS IN: protein serine/threonine kinase activity, kinase activity, ATP binding; INVOLVED IN: transmembrane receptor protein tyrosine kinase signaling pathway, protein amino acid phosphorylation; LOCATED IN: endomembrane system; EXPRESSED IN: 22 plant structures; EXPRESSED DURING: 13 growth stages; CONTAINS InterPro DOMAIN/s: Protein kinase, catalytic domain (Inte…	69.0706	101.125	59.7141	56.8859	77.1717	73.5167	55.3304	73.0089	246986_at	P	P	P	P	P	P	P	P	85.0979	58.3	75.3442	64.1696	0.685093	0.885382	0.754068	0.851686	1.10068
247039_at	At5g67270	encodes a homolog of animal microtubule-end-binding protein. There are two other members of this family. EB1 forms foci at regions where the minus ends of microtubules are gathered during mitosis and early cytokinesis.	10.0561	9.51366	9.84916	11.4716	11.0043	11.0043	10.5561	13.737	247039_at	A	A	P	A	A	A	A	M	9.78488	10.6604	11.0043	12.1466	1.08948	1.12463	1.24136	1.1038	1.13941
247034_at	At5g67260	Encode CYCD3;2, a CYCD3 D-type cyclin. Important for determining cell number in developing lateral organs. Mediating cytokinin effects in apical growth and development.	79.3413	93.0542	69.551	77.1717	153.277	106.891	71.0124	77.7085	247034_at	P	P	P	P	P	P	P	P	86.1978	73.3614	130.084	74.3605	0.851082	1.50914	0.862673	0.571633	1.01362
247033_at	At5g67250	Encodes an SKP1 interacting partner (SKIP2).Encodes an F-box protein. Based on genetic analysis appears to be functionally redundant with VFB1,2, and 3. When expression of all 4 genes is reduced plants show defects in growth and reduced expression of auxin response genes.	115.36	109.137	103.968	116.162	79.8932	119.428	122.786	155.417	247033_at	P	P	P	P	P	P	P	P	112.249	110.065	99.6607	139.101	0.98055	0.887856	1.23923	1.39575	1.26381
247032_at	At5g67240	small RNA degrading nuclease 3 (SDN3); FUNCTIONS IN: exonuclease activity, nucleic acid binding; LOCATED IN: intracellular; EXPRESSED IN: 23 plant structures; EXPRESSED DURING: 13 growth stages; CONTAINS InterPro DOMAIN/s: Exonuclease (InterPro:IPR006055), Polynucleotidyl transferase, ribonuclease H fold (InterPro:IPR012337), Exonuclease, RNase T/DNA polymerase III (InterPro:IPR013520); BEST Arab…	39.3966	40.5042	44.6318	46.2057	81.5719	42.5179	52.7098	41.6429	247032_at	P	P	P	P	P	P	P	P	39.9504	45.4188	62.0449	47.1764	1.13688	1.55305	1.18087	0.760359	1.0387
247031_at	At5g67230	Encodes a member of the GT43 family glycosyltransferases involved in glucuronoxylan biosynthesis: AT2G37090 (IRX9) and AT1G27600 (IRX9-L or I9H, IRX9 homolog); AT4G36890 (IRX14) and AT5G67230 (IRX14-L or I14H, IRX14 homolog). They form two functionally non-redundant groups essential for the normal elongation of glucuronoxylan backbone. I9H functions redundantly with IRX9, I14H is redundant with I…	22.1618	28.0514	24.761	33.1285	29.6508	26.1729	22.6274	30.6965	247031_at	P	P	A	P	P	P	P	P	25.1066	28.9448	27.9118	26.6619	1.15288	1.11173	1.06195	0.955219	0.921132
247042_at	At5g67220	FMN-linked oxidoreductases superfamily protein; FUNCTIONS IN: tRNA dihydrouridine synthase activity, FAD binding, catalytic activity; INVOLVED IN: regulation of nitrogen utilization, oxidation reduction, tRNA processing, metabolic process; LOCATED IN: mitochondrion; EXPRESSED IN: 23 plant structures; EXPRESSED DURING: 13 growth stages; CONTAINS InterPro DOMAIN/s: Aldolase-type TIM barrel (InterPr…	192.672	206.5	205.074	224.411	137.187	206.5	218.275	207.937	247042_at	P	P	P	P	P	P	P	P	199.586	214.742	171.844	213.106	1.07594	0.861001	1.06774	1.24011	0.992377
247030_at	At5g67210	Encode a DUF579 (domain of unknown function 579) containing protein essential for normal xylan synthesis and deposition in the secondary cell wall.	149.086	187.403	95.0095	191.341	67.1819	128	158.683	238.856	247030_at	P	P	P	P	P	P	P	P	168.244	143.175	97.5909	198.77	0.850995	0.580054	1.18143	2.03676	1.3883
246983_at	At5g67200	Leucine-rich repeat protein kinase family protein; FUNCTIONS IN: protein serine/threonine kinase activity, protein kinase activity, ATP binding; INVOLVED IN: transmembrane receptor protein tyrosine kinase signaling pathway, protein amino acid phosphorylation; LOCATED IN: plasma membrane; EXPRESSED IN: 22 plant structures; EXPRESSED DURING: 10 growth stages; CONTAINS InterPro DOMAIN/s: Protein kin…	9.84916	12.295	10.0561	16.5642	10.1965	11.3924	10.9283	12.8171	246983_at	P	P	P	P	P	P	P	P	11.0721	13.3102	10.7944	11.8727	1.20214	0.974925	1.07231	1.09989	0.892003
247029_at	At5g67190	encodes a member of the DREB subfamily A-5 of ERF/AP2 transcription factor family. The protein contains one AP2 domain. There are 16 members in this subfamily including RAP2.1, RAP2.9 and RAP2.10.	56.493	57.68	48.5029	68.1197	25.2813	48.1679	48.1679	49.8665	247029_at	P	P	P	P	P	A	P	P	57.0865	58.3113	36.7246	49.0172	1.02146	0.643315	0.858648	1.33472	0.840612
247041_at	At5g67180	target of early activation tagged (EAT) 3 (TOE3); CONTAINS InterPro DOMAIN/s: DNA-binding, integrase-type (InterPro:IPR016177), Pathogenesis-related transcriptional factor/ERF, DNA-binding (InterPro:IPR001471); BEST Arabidopsis thaliana protein match is: Integrase-type DNA-binding superfamily protein (TAIR:AT4G36920.2); Has 1807 Blast hits to 1807 proteins in 277 species: Archae - 0; Bacteria - 0…	15.6707	15.7797	13.2691	20.393	14.2215	15.3482	17.1484	15.6707	247041_at	P	P	P	P	P	P	P	P	15.7252	16.831	14.7849	16.4096	1.07032	0.9402	1.04352	1.10989	0.974958
247038_at	At5g67160	Encodes a member of the BAHD acyltransferase superfamily. Mutants have enhanced susceptibility to virulent and avirulent pathogens and are defective in pathogen induced SA biosynthesis. EPS1 may act upstream of SA biosynthesis as application of SA can rescue the mutant phenotype.	83.8652	113.772	86.8227	112.206	89.8845	89.2636	84.4485	91.7731	247038_at	P	P	P	P	P	P	P	P	98.8185	99.5141	89.574	88.1108	1.00704	0.90645	0.891643	0.983665	0.88541
247040_at	At5g67150	HXXXD-type acyl-transferase family protein; FUNCTIONS IN: transferase activity, transferring acyl groups other than amino-acyl groups, transferase activity; INVOLVED IN: biological_process unknown; LOCATED IN: cellular_component unknown; EXPRESSED IN: 22 plant structures; EXPRESSED DURING: 13 growth stages; CONTAINS InterPro DOMAIN/s: Transferase (InterPro:IPR003480); BEST Arabidopsis thaliana pr…	44.0173	51.6251	62.6829	64.4452	93.0542	53.8174	40.7859	34.7755	247040_at	P	P	P	P	P	P	P	P	47.8212	63.564	73.4358	37.7807	1.3292	1.53563	0.790041	0.514473	0.594373
247036_at	At5g67130	PLC-like phosphodiesterases superfamily protein; FUNCTIONS IN: phospholipase C activity, phosphoric diester hydrolase activity; INVOLVED IN: intracellular signaling pathway, lipid metabolic process; LOCATED IN: anchored to plasma membrane, plasma membrane; EXPRESSED IN: 23 plant structures; EXPRESSED DURING: 13 growth stages; CONTAINS InterPro DOMAIN/s: Phospholipase C, phosphatidylinositol-speci…	68.5935	67.6492	66.257	59.7141	81.0084	55.3304	67.6492	56.493	247036_at	P	P	P	P	P	P	P	P	68.1213	62.9855	68.1694	62.0711	0.924608	1.00071	0.911184	0.910542	0.985481
247035_at	At5g67110	encodes a myc/bHLH transcription factor-like protein. Gene product is involved in fruit dehiscence. Mutant siliques fail to dehisce.	68.5935	57.2816	50.2134	54.9482	74.5429	52.7098	58.4852	46.8507	247035_at	P	P	P	P	P	P	P	P	62.9376	52.5808	63.6264	52.668	0.835444	1.01094	0.836829	0.827769	1.00166
247028_at	At5g67100	Encodes the putative catalytic subunit of the DNA polymerase alpha. Interacts with genes involved in chromatin-mediated cellular memory. ICU2 genetically interacts with TERMINAL FLOWER2, the ortholog of HETEROCHROMATIN PROTEIN1 of animals and yeasts, and with the Polycomb group (PcG) gene CURLY LEAF. A number of regulatory genes were derepressed in the icu2-1 mutant, including genes associated wi…	6.6807	6.82108	6.6807	5.93809	6.9163	7.31065	5.89708	6.86852	247028_at	A	A	A	A	A	P	A	A	6.75089	6.3094	7.11347	6.3828	0.934602	1.05371	0.945475	0.897283	1.01163
247027_at	At5g67090	Subtilisin-like serine endopeptidase family protein; FUNCTIONS IN: identical protein binding, serine-type endopeptidase activity; INVOLVED IN: proteolysis, negative regulation of catalytic activity; LOCATED IN: endomembrane system; EXPRESSED IN: 9 plant structures; EXPRESSED DURING: 4 anthesis, petal differentiation and expansion stage, D bilateral stage; CONTAINS InterPro DOMAIN/s: Protease-asso…	24.4201	20.2521	20.1122	19.8353	19.9733	24.9333	22.6274	27.4741	247027_at	P	P	P	P	P	P	P	P	22.3361	19.9738	22.4533	25.0508	0.894236	1.00524	1.12154	1.11568	1.25418
247026_at	At5g67080	member of MEKK subfamily	10.3388	9.78112	21.8566	27.6652	29.6508	25.8125	19.2929	25.8125	247026_at	A	A	P	P	P	P	P	P	10.06	24.7609	27.7317	22.5527	2.46133	2.75664	2.24183	0.813248	0.91082	1	1
247037_at	At5g67070	Member of a diversely expressed predicted peptide family showing sequence similarity to tobacco Rapid Alkalinization Factor (RALF), and is believed to play an essential role in the physiology of Arabidopsis. Consists of a single exon and is characterized by a conserved C-terminal motif and N-terminal signal peptide.	35.261	52.7098	28.6408	38.0546	41.6429	33.8246	40.7859	55.3304	247037_at	P	P	P	P	P	P	P	P	43.9854	33.3477	37.7338	48.0582	0.758154	0.85787	1.09259	1.27361	1.44112
247023_at	At5g67060	HECATE 1 (HEC1); FUNCTIONS IN: sequence-specific DNA binding transcription factor activity; INVOLVED IN: transmitting tissue development, carpel formation, regulation of transcription; LOCATED IN: nucleus; EXPRESSED IN: 9 plant structures; EXPRESSED DURING: 6 growth stages; CONTAINS InterPro DOMAIN/s: Helix-loop-helix DNA-binding domain (InterPro:IPR001092), Helix-loop-helix DNA-binding (InterPro…	7.3615	8.45614	9.64646	8.9383	7.88986	9.06307	8.1681	9.51366	247023_at	A	A	A	A	A	A	A	A	7.90882	9.29238	8.47647	8.84088	1.17494	1.07177	1.11785	1.04299	0.951411
247022_at	At5g67050	alpha/beta-Hydrolases superfamily protein; FUNCTIONS IN: triglyceride lipase activity; INVOLVED IN: lipid metabolic process; LOCATED IN: membrane; EXPRESSED IN: sepal, carpel, stamen, leaf; EXPRESSED DURING: petal differentiation and expansion stage; CONTAINS InterPro DOMAIN/s: Lipase, class 3 (InterPro:IPR002921); BEST Arabidopsis thaliana protein match is: alpha/beta-Hydrolases superfamily prot…	9.44794	9.51366	8.45614	8.45614	7.67411	8.63383	8.22491	8.33973	247022_at	A	A	A	A	A	A	A	A	9.4808	8.45614	8.15397	8.28232	0.891923	0.860051	0.873589	1.01574	0.979444
247021_at	At5g67040	Protein of unknown function (DUF295); CONTAINS InterPro DOMAIN/s: Protein of unknown function DUF295 (InterPro:IPR005174); BEST Arabidopsis thaliana protein match is: Protein of unknown function (DUF295) (TAIR:AT5G55440.1); Has 1807 Blast hits to 1807 proteins in 277 species: Archae - 0; Bacteria - 0; Metazoa - 736; Fungi - 347; Plants - 385; Viruses - 0; Other Eukaryotes - 339 (source: NCBI BLin…	8.75435	8.87656	8.57419	8.1681	9.00047	9.12611	10.3388	8.87656	247021_at	A	A	A	A	A	A	P	A	8.81545	8.37114	9.06329	9.60769	0.949599	1.02811	1.08987	1.06007	1.14772
247025_at	At5g67030	Encodes a single copy zeaxanthin epoxidase gene that functions in first step of the biosynthesis of the abiotic stress hormone abscisic acid (ABA). Mutants in this gene are unable to express female sterility in response to beta-aminobutyric acid, as wild type plants do.	1052.79	1584.71	781.445	1184.45	916.506	1530.73	719.076	1074.91	247025_at	P	P	P	P	P	P	P	P	1318.75	982.947	1223.62	896.993	0.745364	0.927862	0.680185	0.733067	0.912555
247020_at	At5g67020	unknown protein; BEST Arabidopsis thaliana protein match is: unknown protein (TAIR:AT3G50340.1); Has 1807 Blast hits to 1807 proteins in 277 species: Archae - 0; Bacteria - 0; Metazoa - 736; Fungi - 347; Plants - 385; Viruses - 0; Other Eukaryotes - 339 (source: NCBI BLink).	9.38268	9.25351	8.57419	10.4831	10.8528	9.98664	9.12611	9.78112	247020_at	A	A	A	A	A	A	P	P	9.31809	9.52867	10.4197	9.45362	1.0226	1.11823	1.01454	0.907279	0.992124
247019_at	At5g67010	encodes a member of the ERF (ethylene response factor) subfamily B-6 of ERF/AP2 transcription factor family. The protein contains one AP2 domain. There are 12 members in this subfamily including RAP2.11.	9.12611	9.64646	8.05564	8.05564	8.87656	7.67411	7.88986	8.11168	247019_at	A	P	A	A	A	A	P	A	9.38629	8.05564	8.27533	8.00077	0.858236	0.881641	0.852389	0.966821	0.993188
247018_at	At5g67000	encodes a member of the ERF (ethylene response factor) subfamily B-6 of ERF/AP2 transcription factor family. The protein contains one AP2 domain. There are 12 members in this subfamily including RAP2.11.	15.7797	12.6407	12.996	15.7797	12.6407	12.3805	11.4716	16	247018_at	P	P	A	A	P	A	P	P	14.2102	14.3879	12.5106	13.7358	1.0125	0.880396	0.966618	1.09794	0.95468
247024_at	At5g66985	unknown protein; Has 30201 Blast hits to 17322 proteins in 780 species: Archae - 12; Bacteria - 1396; Metazoa - 17338; Fungi - 3422; Plants - 5037; Viruses - 0; Other Eukaryotes - 2996 (source: NCBI BLink).	10.0561	11.0043	9.84916	11.6318	10.4107	9.57983	9.57983	11.0043	247024_at	A	P	A	A	A	A	P	P	10.5302	10.7405	9.99528	10.2921	1.01997	0.9492	0.977385	1.02969	0.958253
247017_at	At5g66980	AP2/B3-like transcriptional factor family protein; FUNCTIONS IN: DNA binding, sequence-specific DNA binding transcription factor activity; INVOLVED IN: regulation of transcription, DNA-dependent; LOCATED IN: endomembrane system; EXPRESSED IN: sperm cell, root, flower, egg cell; EXPRESSED DURING: 4 anthesis; CONTAINS InterPro DOMAIN/s: Transcriptional factor B3 (InterPro:IPR003340); BEST Arabidops…	6.49802	6.19026	6.19026	6.54322	6.9644	5.77572	6.1475	6.77396	247017_at	A	A	A	A	A	A	P	A	6.34414	6.36674	6.37006	6.46073	1.00356	1.00409	1.01838	1.01423	1.01476
247016_at	At5g66970	P-loop containing nucleoside triphosphate hydrolases superfamily protein; FUNCTIONS IN: GTP binding; INVOLVED IN: SRP-dependent cotranslational protein targeting to membrane; LOCATED IN: signal recognition particle, endoplasmic reticulum targeting; EXPRESSED IN: sperm cell; CONTAINS InterPro DOMAIN/s: Signal recognition particle, SRP54 subunit, GTPase (InterPro:IPR000897); BEST Arabidopsis thalia…	9.00047	8.63383	7.78124	9.57983	8.69388	8.57419	6.86852	9.71356	247016_at	A	A	A	A	A	A	P	A	8.81715	8.68053	8.63403	8.29104	0.984506	0.979232	0.940332	0.960274	0.95513
247015_at	At5g66960	Prolyl oligopeptidase family protein; FUNCTIONS IN: serine-type peptidase activity, serine-type endopeptidase activity; INVOLVED IN: proteolysis; LOCATED IN: membrane; EXPRESSED IN: 15 plant structures; EXPRESSED DURING: 6 growth stages; CONTAINS InterPro DOMAIN/s: Peptidase S9, prolyl oligopeptidase, catalytic domain (InterPro:IPR001375), Peptidase S9A, oligopeptidase, N-terminal beta-propeller …	10.2674	9.51366	9.91766	10.7779	10.7779	9.25351	9.84916	10.1965	247015_at	P	A	P	P	P	A	P	P	9.89053	10.3478	10.0157	10.0228	1.04623	1.01265	1.01338	1.00071	0.968598
247067_at	At5g66950	Pyridoxal phosphate (PLP)-dependent transferases superfamily protein; FUNCTIONS IN: pyridoxal phosphate binding, catalytic activity; INVOLVED IN: biological_process unknown; LOCATED IN: plasma membrane; EXPRESSED IN: 23 plant structures; EXPRESSED DURING: 13 growth stages; CONTAINS InterPro DOMAIN/s: Pyridoxal phosphate-dependent transferase, major domain (InterPro:IPR015424), Pyridoxal phosphate…	135.298	129.787	140.07	121.095	163.144	121.938	135.298	128.89	247067_at	P	P	P	P	P	P	P	P	132.543	130.582	142.541	132.094	0.985212	1.07543	0.996618	0.926713	1.01158
247066_at	At5g66940	Dof-type zinc finger DNA-binding family protein; CONTAINS InterPro DOMAIN/s: Zinc finger, Dof-type (InterPro:IPR003851); BEST Arabidopsis thaliana protein match is: OBF binding protein 1 (TAIR:AT3G50410.1); Has 1807 Blast hits to 1807 proteins in 277 species: Archae - 0; Bacteria - 0; Metazoa - 736; Fungi - 347; Plants - 385; Viruses - 0; Other Eukaryotes - 339 (source: NCBI BLink).	13.4543	11.7942	13.1775	16	10.6295	13.9288	11.0043	12.996	247066_at	P	P	P	P	A	P	A	P	12.6242	14.5887	12.2791	12.0002	1.15561	0.972664	0.950566	0.977282	0.822566
247045_at	At5g66930	unknown protein; FUNCTIONS IN: molecular_function unknown; INVOLVED IN: biological_process unknown; LOCATED IN: cellular_component unknown; EXPRESSED IN: 24 plant structures; EXPRESSED DURING: 15 growth stages; CONTAINS InterPro DOMAIN/s: Protein of unknown function DUF1649 (InterPro:IPR012445); Has 247 Blast hits to 247 proteins in 111 species: Archae - 0; Bacteria - 0; Metazoa - 89; Fungi - 83;…	91.1392	84.4485	82.1393	66.257	72.5046	77.1717	82.7106	78.249	247045_at	P	P	P	P	P	P	P	P	87.7939	74.1981	74.8381	80.4798	0.84514	0.85243	0.91669	1.07538	1.08466
247069_at	At5g66920	SKU5 similar 17 (sks17); FUNCTIONS IN: oxidoreductase activity, copper ion binding; INVOLVED IN: response to karrikin; LOCATED IN: cell wall, plant-type cell wall; EXPRESSED IN: 21 plant structures; EXPRESSED DURING: 13 growth stages; CONTAINS InterPro DOMAIN/s: Multicopper oxidase, type 3 (InterPro:IPR011707), Cupredoxin (InterPro:IPR008972), Multicopper oxidase, type 2 (InterPro:IPR011706), Mul…	9.64646	11.8762	11.3137	12.9063	16.5642	11.2356	11.3924	15.2422	247069_at	A	A	A	A	P	A	A	P	10.7613	12.11	13.8999	13.3173	1.12532	1.29165	1.23752	0.958086	1.0997
247065_s_at	At5g66900	Disease resistance protein (CC-NBS-LRR class) family; FUNCTIONS IN: ATP binding; INVOLVED IN: apoptosis, defense response; CONTAINS InterPro DOMAIN/s: NB-ARC (InterPro:IPR002182), Powdery mildew resistance protein, RPW8 domain (InterPro:IPR008808), Disease resistance protein (InterPro:IPR000767); BEST Arabidopsis thaliana protein match is: Disease resistance protein (CC-NBS-LRR class) family (TAI…	134.364	125.366	152.219	149.086	268.727	143.013	172.446	168.897	247065_s_at	P	P	P	P	P	P	P	P	129.865	150.652	205.87	170.671	1.16007	1.58527	1.31422	0.829025	1.13288
247064_at	At5g66890	Leucine-rich repeat (LRR) family protein; BEST Arabidopsis thaliana protein match is: Disease resistance protein (CC-NBS-LRR class) family (TAIR:AT5G66900.1); Has 1807 Blast hits to 1807 proteins in 277 species: Archae - 0; Bacteria - 0; Metazoa - 736; Fungi - 347; Plants - 385; Viruses - 0; Other Eukaryotes - 339 (source: NCBI BLink).	7.3615	8.69388	6.72717	9.78112	7.67411	8.05564	8.22491	7.51618	247064_at	P	A	A	A	A	P	P	A	8.02769	8.25415	7.86488	7.87055	1.02821	0.979719	0.980425	1.00072	0.953526
247043_at	At5g66880	encodes a member of SNF1-related protein kinases (SnRK2) whose activity is activated by ionic (salt) and non-ionic (mannitol) osmotic stress. Enzyme involved in the ABA signaling during seed germination, dormancy and seedling growth.	393.44	326.288	442.643	364.557	652.575	369.646	445.722	413.001	247043_at	P	P	P	P	P	P	P	P	359.864	403.6	511.11	429.361	1.12154	1.42029	1.19312	0.840056	1.06383
247044_at	At5g66850	member of MEKK subfamily	56.1028	50.9143	44.6318	38.3193	45.5696	46.2057	50.2134	55.7152	247044_at	P	P	P	A	P	P	P	P	53.5086	41.4756	45.8877	52.9643	0.77512	0.857576	0.989829	1.15422	1.277
247063_at	At5g66820	unknown protein; Has 35333 Blast hits to 34131 proteins in 2444 species: Archae - 798; Bacteria - 22429; Metazoa - 974; Fungi - 991; Plants - 531; Viruses - 0; Other Eukaryotes - 9610 (source: NCBI BLink).	225.972	225.972	256	212.306	195.361	174.853	216.767	188.706	247063_at	P	P	P	P	P	P	P	P	225.972	234.153	185.107	202.737	1.0362	0.81916	0.897176	1.09524	0.86583
247070_at	At5g66815	unknown protein; FUNCTIONS IN: molecular_function unknown; INVOLVED IN: biological_process unknown; LOCATED IN: endomembrane system; EXPRESSED IN: root; Has 30201 Blast hits to 17322 proteins in 780 species: Archae - 12; Bacteria - 1396; Metazoa - 17338; Fungi - 3422; Plants - 5037; Viruses - 0; Other Eukaryotes - 2996 (source: NCBI BLink).	8	6.82108	5.42642	7.3615	5.85634	5.61778	6.06287	6.49802	247070_at	A	A	A	A	A	A	A	A	7.41054	6.39396	5.73706	6.28044	0.86282	0.774176	0.847501	1.09471	0.982246
247062_at	At5g66810	CONTAINS InterPro DOMAIN/s: CTLH, C-terminal LisH motif (InterPro:IPR006595); BEST Arabidopsis thaliana protein match is: LisH and RanBPM domains containing protein (TAIR:AT1G61150.1); Has 333 Blast hits to 242 proteins in 88 species: Archae - 0; Bacteria - 0; Metazoa - 104; Fungi - 47; Plants - 152; Viruses - 0; Other Eukaryotes - 30 (source: NCBI BLink).	64	71.0124	66.7178	50.2134	97.0059	52.3457	66.257	60.5477	247062_at	P	P	P	P	P	P	P	P	67.5062	58.4656	74.6758	63.4023	0.866077	1.10621	0.939207	0.849034	1.08444
247068_at	At5g66800	unknown protein; BEST Arabidopsis thaliana protein match is: unknown protein (TAIR:AT3G50640.1); Has 1807 Blast hits to 1807 proteins in 277 species: Archae - 0; Bacteria - 0; Metazoa - 736; Fungi - 347; Plants - 385; Viruses - 0; Other Eukaryotes - 339 (source: NCBI BLink).	18.2522	15.5625	19.4271	19.9733	14.1232	17.6305	18.2522	17.2677	247068_at	P	P	P	P	A	P	P	P	16.9073	19.7002	15.8769	17.7599	1.16519	0.939051	1.05043	1.1186	0.90151
247061_at	At5g66780	unknown protein; Has 1807 Blast hits to 1807 proteins in 277 species: Archae - 0; Bacteria - 0; Metazoa - 736; Fungi - 347; Plants - 385; Viruses - 0; Other Eukaryotes - 339 (source: NCBI BLink).	8.28212	7.88986	8.05564	8.63383	9.18959	8.28212	8.81524	8.81524	247061_at	A	A	P	A	P	P	P	M	8.08599	8.34474	8.73585	8.81524	1.032	1.08037	1.09019	1.00909	1.05638
247057_at	At5g66770	GRAS family transcription factor; CONTAINS InterPro DOMAIN/s: Transcription factor GRAS (InterPro:IPR005202); BEST Arabidopsis thaliana protein match is: GRAS family transcription factor (TAIR:AT3G50650.1); Has 1807 Blast hits to 1807 proteins in 277 species: Archae - 0; Bacteria - 0; Metazoa - 736; Fungi - 347; Plants - 385; Viruses - 0; Other Eukaryotes - 339 (source: NCBI BLink).	43.4113	39.6706	45.5696	33.3589	24.4201	32.4467	30.4844	24.9333	247057_at	P	P	P	P	P	P	P	P	41.541	39.4643	28.4334	27.7088	0.950008	0.684467	0.667024	0.974516	0.702125
247060_at	At5g66760	One of two genes in Arabidopsis that encode a flavoprotein subunit of the mitochondrial succinate dehydrogenase complex.	330.842	326.288	344.892	257.781	101.125	284.05	308.687	278.204	247060_at	P	P	P	P	P	P	P	P	328.565	301.336	192.588	293.445	0.917128	0.586148	0.893113	1.5237	0.973814
247056_at	At5g66750	Protein is similar to SWI2/SNF2 chromatin remodeling proteins. DDM1 is appears to act as a chromatin-remodeling ATPase involved in cytosine methylation in CG and non-CG contexts. Involved in gene silencing and maintenance of DNA methylation and histone methylation. Hypomethylation of many genomic regions occurs in ddm1 mutants, and can cause several phenotypic abnormalities, but some loci, such a…	7.3615	6.45313	6.86852	7.51618	8.69388	6.86852	7.67411	7.01285	247056_at	A	A	A	A	A	A	A	A	6.90732	7.19235	7.7812	7.34348	1.04127	1.12652	1.06314	0.943746	1.02101
247055_at	At5g66740	Protein of unknown function (DUF620); CONTAINS InterPro DOMAIN/s: Protein of unknown function DUF620 (InterPro:IPR006873); BEST Arabidopsis thaliana protein match is: Protein of unknown function (DUF620) (TAIR:AT1G75160.1); Has 213 Blast hits to 212 proteins in 19 species: Archae - 0; Bacteria - 2; Metazoa - 0; Fungi - 0; Plants - 211; Viruses - 0; Other Eukaryotes - 0 (source: NCBI BLink).	9.12611	9.25351	11.7127	8.39773	10.1261	10.4107	8.22491	10.7779	247055_at	A	A	P	A	A	A	A	P	9.18981	10.0552	10.2684	9.50139	1.09417	1.11737	1.03391	0.925304	0.944922
247054_at	At5g66730	C2H2-like zinc finger protein; FUNCTIONS IN: sequence-specific DNA binding transcription factor activity, zinc ion binding, nucleic acid binding; INVOLVED IN: regulation of transcription; LOCATED IN: intracellular; EXPRESSED IN: 22 plant structures; EXPRESSED DURING: 13 growth stages; CONTAINS InterPro DOMAIN/s: Zinc finger, C2H2-like (InterPro:IPR015880), Zinc finger, C2H2-type (InterPro:IPR0070…	73.5167	64.4452	85.6274	59.3016	49.5221	74.028	77.1717	79.3413	247054_at	P	P	P	P	P	P	P	P	68.9809	72.4645	61.7751	78.2565	1.0505	0.895538	1.13447	1.2668	1.07993
247053_at	At5g66710	Protein kinase superfamily protein; FUNCTIONS IN: protein serine/threonine/tyrosine kinase activity, kinase activity; INVOLVED IN: protein amino acid phosphorylation; LOCATED IN: plasma membrane; EXPRESSED IN: 9 plant structures; EXPRESSED DURING: 4 anthesis, F mature embryo stage, petal differentiation and expansion stage, E expanded cotyledon stage, D bilateral stage; CONTAINS InterPro DOMAIN/s…	7.88986	8.75435	8.33973	9.44794	8.75435	8.81524	9.57983	8.51496	247053_at	A	A	A	A	A	A	A	A	8.32211	8.89383	8.7848	9.0474	1.0687	1.0556	1.08715	1.02989	1.01727
247052_at	At5g66700	Encodes a homeodomain protein. Member of HD-ZIP 1 family, most closely related to HB5. AtHB53 is auxin-inducible and its induction is inhibited by cytokinin, especially in roots therefore may be involved in root development.	14.2215	18.3792	16.9123	14.1232	12.6407	13.5479	14.2215	9.78112	247052_at	P	P	P	P	P	P	P	P	16.3003	15.5178	13.0943	12.0013	0.951991	0.803315	0.736261	0.916529	0.773391
247059_at	At5g66690	UGT72E2 is an UDPG:coniferyl alcohol glucosyltransferase which glucosylates sinapyl- and coniferyl aldehydes as well as sinapyl- and coniferyl alcohol. The enzyme is thought to be involved in lignin metabolism. A knockdown mutant line (72E2KD) was obtained using RNAi silencing. A twofold reduction in coniferyl alcohol 4-<i>O</i>-glucoside and sinapyl alcohol 4-<i>O</i>-glucoside was detected in t…	39.1245	35.0174	30.4844	46.2057	25.4572	28.0514	24.4201	26.3549	247059_at	P	P	P	P	A	P	P	P	37.0709	38.3451	26.7543	25.3875	1.03437	0.721705	0.684836	0.948915	0.662081
247058_at	At5g66680	Encodes a protein ortholog of human SOT48 or yeast WBP1, an essential protein subunit of the oligosaccharyltransferase (OST) complex, which is responsible for the transfer in the ER of the N-linked glycan precursor onto Asn residues of candidate proteins.	266.871	247.28	298.172	240.518	315.173	254.232	324.034	256	247058_at	P	P	P	P	P	P	P	P	257.075	269.345	284.702	290.017	1.04773	1.10747	1.12814	1.01867	1.07675
247051_at	At5g66670	Protein of unknown function (DUF677); FUNCTIONS IN: molecular_function unknown; INVOLVED IN: biological_process unknown; LOCATED IN: chloroplast; EXPRESSED IN: inflorescence meristem, hypocotyl, root; CONTAINS InterPro DOMAIN/s: Protein of unknown function DUF677 (InterPro:IPR007749); BEST Arabidopsis thaliana protein match is: Protein of unknown function (DUF677) (TAIR:AT5G66660.1); Has 1807 Bla…	20.8215	27.8576	16.9123	21.8566	18.6357	20.6776	19.8353	16.6795	247051_at	P	P	A	P	P	P	P	P	24.3395	19.3845	19.6567	18.2574	0.796419	0.807603	0.750112	0.928813	0.941857
247050_at	At5g66660	Protein of unknown function (DUF677); FUNCTIONS IN: molecular_function unknown; INVOLVED IN: biological_process unknown; LOCATED IN: chloroplast; EXPRESSED IN: inflorescence meristem; CONTAINS InterPro DOMAIN/s: Protein of unknown function DUF677 (InterPro:IPR007749); BEST Arabidopsis thaliana protein match is: Protein of unknown function (DUF677) (TAIR:AT5G66670.2); Has 1807 Blast hits to 1807 p…	12.4666	13.0864	12.295	12.3805	12.295	12.996	13.737	12.4666	247050_at	A	P	A	A	A	P	P	P	12.7765	12.3378	12.6455	13.1018	0.965658	0.989746	1.02546	1.03609	1.06193
247047_at	At5g66650	Protein of unknown function (DUF607); CONTAINS InterPro DOMAIN/s: Protein of unknown function DUF607 (InterPro:IPR006769); BEST Arabidopsis thaliana protein match is: Protein of unknown function (DUF607) (TAIR:AT2G23790.1); Has 1807 Blast hits to 1807 proteins in 277 species: Archae - 0; Bacteria - 0; Metazoa - 736; Fungi - 347; Plants - 385; Viruses - 0; Other Eukaryotes - 339 (source: NCBI BLin…	17.7531	24.4201	33.5909	36.7583	44.3235	41.3553	39.1245	51.6251	247047_at	A	A	A	P	P	P	P	P	21.0866	35.1746	42.8394	45.3748	1.6681	2.03159	2.15183	1.05918	1.28999		1
247071_at	At5g66640	DA1-related protein 3 (DAR3); FUNCTIONS IN: molecular_function unknown; INVOLVED IN: biological_process unknown; LOCATED IN: cellular_component unknown; EXPRESSED IN: 8 plant structures; EXPRESSED DURING: 7 growth stages; CONTAINS InterPro DOMAIN/s: Protein of unknown function DUF3633 (InterPro:IPR022087); BEST Arabidopsis thaliana protein match is: DA1-related protein 6 (TAIR:AT5G66620.1).	9.71356	7.26015	7.88986	7.4127	9.25351	7.31065	7.56846	8.63383	247071_at	A	A	P	A	A	P	A	A	8.48686	7.65128	8.28208	8.10114	0.901545	0.975871	0.954552	0.978153	1.0588
247105_at	At5g66630	DA1-related protein 5 (DAR5); FUNCTIONS IN: zinc ion binding, ATP binding; INVOLVED IN: apoptosis; EXPRESSED IN: 12 plant structures; EXPRESSED DURING: LP.04 four leaves visible, 4 anthesis, petal differentiation and expansion stage; CONTAINS InterPro DOMAIN/s: Zinc finger, LIM-type (InterPro:IPR001781), NB-ARC (InterPro:IPR002182), Powdery mildew resistance protein, RPW8 domain (InterPro:IPR0088…	33.1285	32	38.3193	37.7918	39.6706	34.0598	35.261	37.7918	247105_at	P	P	P	P	P	P	P	P	32.5642	38.0555	36.8652	36.5264	1.16863	1.13208	1.12167	0.990808	0.959817
247104_at	At5g66620	DA1-related protein 6 (DAR6); FUNCTIONS IN: zinc ion binding; EXPRESSED IN: 13 plant structures; EXPRESSED DURING: 8 growth stages; CONTAINS InterPro DOMAIN/s: Zinc finger, LIM-type (InterPro:IPR001781), Ubiquitin interacting motif (InterPro:IPR003903), Protein of unknown function DUF3633 (InterPro:IPR022087); BEST Arabidopsis thaliana protein match is: DA1-related protein 5 (TAIR:AT5G66630.1); H…	6.49802	6.1475	6.10504	6.1475	6.32033	6.1475	5.50217	6.49802	247104_at	A	A	A	A	A	P	P	A	6.32276	6.12627	6.23392	6.00009	0.968923	0.985948	0.948967	0.962492	0.979404
247103_at	At5g66610	DA1-related protein 7 (DAR7); FUNCTIONS IN: zinc ion binding; LOCATED IN: cellular_component unknown; EXPRESSED IN: 16 plant structures; EXPRESSED DURING: 7 growth stages; CONTAINS InterPro DOMAIN/s: Zinc finger, LIM-type (InterPro:IPR001781), Protein of unknown function DUF3633 (InterPro:IPR022087); BEST Arabidopsis thaliana protein match is: DA1-related protein 6 (TAIR:AT5G66620.1).	11.7942	12.295	11.5514	11.1579	12.042	12.8171	13.0864	13.9288	247103_at	A	A	A	A	A	A	A	A	12.0446	11.3547	12.4295	13.5076	0.942722	1.03196	1.12147	1.08673	1.18961
247074_at	At5g66590	CAP (Cysteine-rich secretory proteins, Antigen 5, and Pathogenesis-related 1 protein) superfamily protein; FUNCTIONS IN: molecular_function unknown; INVOLVED IN: biological_process unknown; LOCATED IN: endomembrane system, extracellular region; EXPRESSED IN: 22 plant structures; EXPRESSED DURING: 13 growth stages; CONTAINS InterPro DOMAIN/s: Allergen V5/Tpx-1 related (InterPro:IPR001283), SCP-lik…	18.507	20.2521	16	22.7848	17.1484	15.1369	17.6305	19.0273	247074_at	P	P	P	P	P	P	P	P	19.3796	19.3924	16.1426	18.3289	1.00066	0.832973	0.945785	1.13543	0.945159
247073_at	At5g66570	Encodes a protein which is an extrinsic subunit of photosystem II and which has been proposed to play a central role in stabilization of the catalytic manganese cluster. In <i>Arabidopsis thaliana</i> the PsbO proteins are encoded by two genes: <i>psbO1</i> and <i>psbO2</i>. PsbO1 is the major isoform in the wild-type.	2210.26	2418.67	1686.71	1606.83	515.561	2194.99	1782.89	1758.34	247073_at	P	P	P	P	P	P	P	P	2314.47	1646.77	1355.28	1770.61	0.711512	0.585568	0.765021	1.30646	1.0752
247048_at	At5g66560	Phototropic-responsive NPH3 family protein; FUNCTIONS IN: signal transducer activity; INVOLVED IN: response to light stimulus; LOCATED IN: plasma membrane; EXPRESSED IN: 22 plant structures; EXPRESSED DURING: 13 growth stages; CONTAINS InterPro DOMAIN/s: NPH3 (InterPro:IPR004249), BTB/POZ fold (InterPro:IPR011333), BTB/POZ-like (InterPro:IPR000210); BEST Arabidopsis thaliana protein match is: Pho…	38.0546	34.5353	36.0019	35.261	27.4741	44.6318	37.5307	43.1115	247048_at	P	P	P	P	P	P	P	P	36.295	35.6314	36.0529	40.3211	0.981718	0.993332	1.11093	1.11839	1.13162
247102_at	At5g66550	Maf-like protein; FUNCTIONS IN: molecular_function unknown; INVOLVED IN: biological_process unknown; LOCATED IN: chloroplast; EXPRESSED IN: 15 plant structures; EXPRESSED DURING: 9 growth stages; CONTAINS InterPro DOMAIN/s: Maf-like protein (InterPro:IPR003697); BEST Arabidopsis thaliana protein match is: Maf-like protein (TAIR:AT5G42770.2); Has 30201 Blast hits to 17322 proteins in 780 species: …	34.7755	29.2426	26.1729	38.3193	37.2715	37.2715	32.2226	39.9466	247102_at	P	P	P	P	P	P	P	P	32.0091	32.2461	37.2715	36.0846	1.00741	1.1644	1.12732	0.968155	1.11904
247046_at	At5g66540	FUNCTIONS IN: molecular_function unknown; INVOLVED IN: rRNA processing; LOCATED IN: cytosol, nucleolus, nucleus; EXPRESSED IN: 22 plant structures; EXPRESSED DURING: 12 growth stages; CONTAINS InterPro DOMAIN/s: U3 small nucleolar ribonucleoprotein complex, subunit Mpp10p (InterPro:IPR012173), Mpp10 protein (InterPro:IPR007151); Has 30201 Blast hits to 17322 proteins in 780 species: Archae - 12; …	14.42	16.4498	17.5087	20.6776	19.0273	15.3482	18.1261	18.0009	247046_at	P	P	P	P	P	A	P	P	15.4349	19.0932	17.1878	18.0635	1.23701	1.11356	1.1703	1.05095	0.946073
247101_at	At5g66530	Galactose mutarotase-like superfamily protein; FUNCTIONS IN: carbohydrate binding, isomerase activity, aldose 1-epimerase activity, catalytic activity; INVOLVED IN: galactose metabolic process, carbohydrate metabolic process; LOCATED IN: apoplast, chloroplast, chloroplast stroma; EXPRESSED IN: 24 plant structures; EXPRESSED DURING: 13 growth stages; CONTAINS InterPro DOMAIN/s: Glycoside hydrolase…	112.206	108.383	119.428	129.787	205.074	114.563	125.366	126.238	247101_at	P	P	P	P	P	P	P	P	110.294	124.608	159.819	125.802	1.12977	1.44902	1.1406	0.787154	1.00958
247100_at	At5g66520	Tetratricopeptide repeat (TPR)-like superfamily protein; CONTAINS InterPro DOMAIN/s: Pentatricopeptide repeat (InterPro:IPR002885); BEST Arabidopsis thaliana protein match is: Pentatricopeptide repeat (PPR) superfamily protein (TAIR:AT5G06540.1); Has 1807 Blast hits to 1807 proteins in 277 species: Archae - 0; Bacteria - 0; Metazoa - 736; Fungi - 347; Plants - 385; Viruses - 0; Other Eukaryotes -…	10.7779	10.7034	9.51366	9.84916	13.737	10.4107	9.06307	8.63383	247100_at	P	P	P	A	P	P	P	A	10.7406	9.68141	12.0739	8.84845	0.90138	1.12413	0.823828	0.732858	0.913963
247076_at	At5g66510	Encodes mitochondrial gamma carbonic anhydrase. Component of the NADH dehydrogenase complex.	167.73	152.219	166.572	168.897	205.074	148.056	176.069	165.421	247076_at	P	P	P	P	P	P	P	P	159.974	167.734	176.565	170.745	1.04851	1.10371	1.06733	0.967039	1.01795
247099_at	At5g66500	Tetratricopeptide repeat (TPR)-like superfamily protein; CONTAINS InterPro DOMAIN/s: Pentatricopeptide repeat (InterPro:IPR002885); BEST Arabidopsis thaliana protein match is: Tetratricopeptide repeat (TPR)-like superfamily protein (TAIR:AT3G03580.1); Has 1807 Blast hits to 1807 proteins in 277 species: Archae - 0; Bacteria - 0; Metazoa - 736; Fungi - 347; Plants - 385; Viruses - 0; Other Eukaryo…	6.63456	6.6807	6.49802	6.86852	5.93809	6.02099	6.72717	6.82108	247099_at	A	P	P	P	A	A	P	P	6.65763	6.68327	5.97954	6.77413	1.00385	0.898149	1.0175	1.13288	1.01359
247072_at	At5g66490	unknown protein; FUNCTIONS IN: molecular_function unknown; INVOLVED IN: biological_process unknown; LOCATED IN: plasma membrane; EXPRESSED IN: 17 plant structures; EXPRESSED DURING: 9 growth stages; BEST Arabidopsis thaliana protein match is: unknown protein (TAIR:AT3G50900.1); Has 1807 Blast hits to 1807 proteins in 277 species: Archae - 0; Bacteria - 0; Metazoa - 736; Fungi - 347; Plants - 385;…	369.646	326.288	321.795	321.795	172.446	362.039	359.538	324.034	247072_at	P	P	P	P	P	P	P	P	347.967	321.795	267.242	341.786	0.924788	0.768011	0.982237	1.27894	1.06212
247098_at	At5g66470	RNA binding;GTP binding; FUNCTIONS IN: RNA binding, GTP binding; LOCATED IN: chloroplast; EXPRESSED IN: 20 plant structures; EXPRESSED DURING: 13 growth stages; CONTAINS InterPro DOMAIN/s: K Homology, type 2 (InterPro:IPR004044), K Homology, prokaryotic type (InterPro:IPR009019), Small GTP-binding protein (InterPro:IPR005225), GTP1/OBG (InterPro:IPR006073), GTP-binding protein Era (InterPro:IPR00…	32.4467	32.8996	35.5062	27.0958	32	31.5594	30.91	29.2426	247098_at	P	P	P	P	P	P	P	P	32.6732	31.301	31.7797	30.0763	0.958004	0.972655	0.920519	0.946399	0.960872
247097_at	At5g66460	Glycosyl hydrolase superfamily protein; FUNCTIONS IN: cation binding, hydrolase activity, hydrolyzing O-glycosyl compounds, catalytic activity; INVOLVED IN: carbohydrate metabolic process; LOCATED IN: endomembrane system; EXPRESSED IN: 17 plant structures; EXPRESSED DURING: 4 anthesis, C globular stage, 4 leaf senescence stage, petal differentiation and expansion stage, E expanded cotyledon stage…	28.2465	28.6408	31.779	24.9333	18.7654	26.1729	23.7524	29.0406	247097_at	P	P	P	P	A	P	P	P	28.4436	28.3561	22.4691	26.3965	0.996922	0.789952	0.928028	1.17479	0.930893
247049_at	At5g66440	unknown protein; BEST Arabidopsis thaliana protein match is: unknown protein (TAIR:AT4G34560.1); Has 1807 Blast hits to 1807 proteins in 277 species: Archae - 0; Bacteria - 0; Metazoa - 736; Fungi - 347; Plants - 385; Viruses - 0; Other Eukaryotes - 339 (source: NCBI BLink).	196.72	176.069	254.232	206.5	224.411	200.854	243.875	206.5	247049_at	P	P	P	P	P	P	P	P	186.395	230.366	212.632	225.188	1.2359	1.14076	1.20812	1.05905	0.977522
247096_at	At5g66430	S-adenosyl-L-methionine-dependent methyltransferases superfamily protein; FUNCTIONS IN: methyltransferase activity; INVOLVED IN: biological_process unknown; LOCATED IN: cellular_component unknown; EXPRESSED IN: pollen tube; CONTAINS InterPro DOMAIN/s: SAM dependent carboxyl methyltransferase (InterPro:IPR005299); BEST Arabidopsis thaliana protein match is: S-adenosyl-L-methionine-dependent methyl…	6.19026	6.54322	6.54322	6.49802	6.02099	7.11074	6.19026	5.81589	247096_at	A	P	A	A	A	A	A	A	6.36674	6.52062	6.56586	6.00308	1.02417	1.03128	0.942881	0.914286	0.92063
247077_at	At5g66420	LOCATED IN: cellular_component unknown; EXPRESSED IN: 23 plant structures; EXPRESSED DURING: 13 growth stages; CONTAINS InterPro DOMAIN/s: Uncharacterised conserved protein UCP033271 (InterPro:IPR008322), TIM-barrel signal transduction protein, predicted (InterPro:IPR009215); Has 1232 Blast hits to 1230 proteins in 311 species: Archae - 18; Bacteria - 959; Metazoa - 1; Fungi - 84; Plants - 42; Vi…	168.897	200.854	194.012	199.466	152.219	171.255	186.108	212.306	247077_at	P	P	P	P	P	P	P	P	184.875	196.739	161.737	199.207	1.06417	0.874842	1.07752	1.23168	1.01255
247075_at	At5g66410	Encodes a protein that functions in microtubule assembly. Plants with reduced levels of both PLP3a (At3g50960) and PLP3b show defects in cytokinesis, cortical microtubule array formation, oriented cell growth, and maintenance of proper ploidy.	42.2243	47.5048	37.2715	48.8403	72.5046	42.2243	49.8665	50.5626	247075_at	P	P	P	P	P	P	P	P	44.8645	43.0559	57.3644	50.2146	0.959687	1.27861	1.11925	0.875361	1.16627
247095_at	At5g66400	Belongs to the dehydrin protein family, which contains highly conserved stretches of 7-17 residues that are repetitively scattered in their sequences, the K-, S-, Y- and lysine rich segments. ABA- and drought-induced glycine-rice dehydrin protein. The ABA-induced expression of RAB18 was reduced following ACC application, indicating that ethylene inhibits the ABA signaling pathway. RAB18 is also e…	250.732	215.269	178.527	184.823	32.2226	225.972	242.191	227.544	247095_at	P	P	P	P	P	P	P	P	233.001	181.675	129.097	234.867	0.779719	0.554064	1.00801	1.8193	1.29279
247091_at	At5g66390	Peroxidase superfamily protein; FUNCTIONS IN: peroxidase activity, heme binding; INVOLVED IN: response to oxidative stress, oxidation reduction; LOCATED IN: endomembrane system; EXPRESSED IN: leaf apex, hypocotyl, root, flower; EXPRESSED DURING: 4 anthesis, petal differentiation and expansion stage; CONTAINS InterPro DOMAIN/s: Haem peroxidase (InterPro:IPR010255), Plant peroxidase (InterPro:IPR00…	7.88986	7.1602	7.01285	8.22491	7.56846	9.06307	7.72749	7.46426	247091_at	A	A	A	A	A	P	A	A	7.52503	7.61888	8.31577	7.59588	1.01247	1.10508	1.00941	0.913431	0.996981
247092_at	At5g66380	Encodes a folate transporter that is located in the chloroplast envelope and is able to mediate exogenous folate uptake when expressed in E. coli. However, this is not the sole folate transporter for chloroplasts as null mutants of this gene have no discernible phenotype when grown under folate-sufficient conditions and contained wild-type levels of folates in leaves.	95.0095	87.4266	106.891	95.0095	141.044	95.6704	98.36	90.5097	247092_at	P	P	P	P	P	P	P	P	91.218	100.95	118.357	94.4348	1.10669	1.29752	1.03526	0.797881	0.935458
247090_at	At5g66370	unknown protein; BEST Arabidopsis thaliana protein match is: unknown protein (TAIR:AT3G51020.1); Has 1807 Blast hits to 1807 proteins in 277 species: Archae - 0; Bacteria - 0; Metazoa - 736; Fungi - 347; Plants - 385; Viruses - 0; Other Eukaryotes - 339 (source: NCBI BLink).	7.83536	7.46426	8.05564	7.01285	7.72749	6.77396	6.77396	7.56846	247090_at	A	A	M	A	A	A	A	A	7.64981	7.53425	7.25073	7.17121	0.984893	0.947831	0.937436	0.989034	0.951816
247089_at	At5g66360	Encodes a mitochondrial rRNA dimethylase.	63.5579	70.5219	51.2685	43.1115	88.647	66.7178	51.2685	48.8403	247089_at	P	P	P	P	P	P	P	P	67.0399	47.19	77.6824	50.0544	0.703909	1.15875	0.746635	0.644346	1.0607
247093_at	At5g66350	A member of SHI gene family. Arabidopsis thaliana has ten members that encode proteins with a RING finger-like zinc finger motif. Despite being highly divergent in sequence, many of the SHI-related genes are partially redundant in function and synergistically promote gynoecium, stamen and leaf development in Arabidopsis. Shi mutant is dominant, has dwarf phenotype. Loss of function mutations have…	20.2521	20.1122	25.8125	21.259	18.6357	17.1484	19.2929	14.9285	247093_at	P	P	P	P	A	P	P	A	20.1822	23.5358	17.8921	17.1107	1.16617	0.886528	0.847814	0.956331	0.72701
247088_at	At5g66340	unknown protein; Has 1807 Blast hits to 1807 proteins in 277 species: Archae - 0; Bacteria - 0; Metazoa - 736; Fungi - 347; Plants - 385; Viruses - 0; Other Eukaryotes - 339 (source: NCBI BLink).	16.2234	17.5087	16.4498	17.6305	18.3792	18.3792	15.7797	16.1113	247088_at	A	A	A	M	P	P	P	A	16.866	17.0402	18.3792	15.9455	1.01032	1.08972	0.945422	0.867586	0.935761
247087_at	At5g66330	Leucine-rich repeat (LRR) family protein; INVOLVED IN: signal transduction; LOCATED IN: endomembrane system; EXPRESSED IN: 15 plant structures; EXPRESSED DURING: 8 growth stages; CONTAINS InterPro DOMAIN/s: Leucine-rich repeat-containing N-terminal domain, type 2 (InterPro:IPR013210), Leucine-rich repeat (InterPro:IPR001611); BEST Arabidopsis thaliana protein match is: Leucine-rich repeat (LRR) f…	15.7797	16.9123	14.8254	18.0009	15.1369	16.2234	11.7127	18.7654	247087_at	P	A	P	P	P	A	A	A	16.346	16.4132	15.6801	15.239	1.00411	0.959264	0.932278	0.971868	0.928463
247086_at	At5g66320	Encodes GATA transcription factor gene GNC, involved in regulating carbon and nitrogen metabolism. Expression occurs in aerial tissue at an early stage of development and is inducible by nitrate.	97.0059	83.8652	173.645	118.603	51.2685	111.43	172.446	144.007	247086_at	P	P	P	P	P	P	P	P	90.4355	146.124	81.3495	158.227	1.61578	0.89953	1.74961	1.94502	1.08282
247085_at	At5g66310	ATP binding microtubule motor family protein; FUNCTIONS IN: microtubule motor activity, ATP binding; INVOLVED IN: microtubule-based movement; EXPRESSED IN: 22 plant structures; EXPRESSED DURING: 15 growth stages; CONTAINS InterPro DOMAIN/s: Protein of unknown function DUF3490 (InterPro:IPR021881), Kinesin, motor region, conserved site (InterPro:IPR019821), Kinesin, motor domain (InterPro:IPR00175…	9.71356	11.2356	11.0043	9.25351	9.06307	10.6295	10.5561	12.042	247085_at	A	A	P	A	P	P	P	A	10.4746	10.1289	9.84628	11.299	0.967002	0.940018	1.07871	1.14754	1.11552
247084_at	At5g66300	Encodes a NAC-domain transcription factor. Expressed in the vascular tissue.	8.57419	7.21	8.33973	8.57419	12.3805	8.33973	9.06307	10.4831	247084_at	P	A	A	A	A	A	P	P	7.8921	8.45696	10.3601	9.77311	1.07157	1.31272	1.23834	0.943339	1.15563
247083_at	At5g66290	unknown protein; FUNCTIONS IN: molecular_function unknown; INVOLVED IN: N-terminal protein myristoylation; LOCATED IN: cellular_component unknown; EXPRESSED IN: 14 plant structures; EXPRESSED DURING: 7 growth stages; Has 1807 Blast hits to 1807 proteins in 277 species: Archae - 0; Bacteria - 0; Metazoa - 736; Fungi - 347; Plants - 385; Viruses - 0; Other Eukaryotes - 339 (source: NCBI BLink).	121.938	115.36	145.009	116.97	151.167	138.141	128	122.786	247083_at	P	P	P	P	P	P	P	P	118.649	130.99	144.654	125.393	1.10401	1.21918	1.05684	0.866846	0.957272
247094_at	At5g66280	GDP-D-mannose 4,6-dehydratase	11.7942	13.1775	13.9288	14.9285	13.6422	11.7127	12.9063	15.0324	247094_at	A	A	A	A	A	A	A	A	12.4858	14.4287	12.6774	13.9693	1.15561	1.01535	1.11882	1.10191	0.968164
247135_at	At5g66260	SAUR-like auxin-responsive protein family ; CONTAINS InterPro DOMAIN/s: Auxin responsive SAUR protein (InterPro:IPR003676); BEST Arabidopsis thaliana protein match is: SAUR-like auxin-responsive protein family (TAIR:AT4G36110.1); Has 1807 Blast hits to 1807 proteins in 277 species: Archae - 0; Bacteria - 0; Metazoa - 736; Fungi - 347; Plants - 385; Viruses - 0; Other Eukaryotes - 339 (source: NCB…	7.6211	6.27667	8.75435	8.39773	7.1602	8.57419	7.06162	6.82108	247135_at	A	A	P	A	A	P	A	A	6.94889	8.57604	7.86719	6.94135	1.23416	1.13215	0.998915	0.882316	0.809389
247140_at	At5g66250	kinectin-related; INVOLVED IN: biological_process unknown; EXPRESSED IN: 24 plant structures; EXPRESSED DURING: 15 growth stages; BEST Arabidopsis thaliana protein match is: unknown protein (TAIR:AT2G17990.1).	205.074	206.5	182.278	168.897	196.72	168.897	178.527	168.897	247140_at	P	P	P	P	P	P	P	P	205.787	175.588	182.809	173.712	0.853249	0.888338	0.844135	0.950241	0.989318
247106_at	At5g66240	Transducin/WD40 repeat-like superfamily protein; CONTAINS InterPro DOMAIN/s: WD40 repeat 2 (InterPro:IPR019782), WD40 repeat-like-containing domain (InterPro:IPR011046), WD40-repeat-containing domain (InterPro:IPR017986), WD40/YVTN repeat-like-containing domain (InterPro:IPR015943), WD40 repeat (InterPro:IPR001680), WD40 repeat, subgroup (InterPro:IPR019781), G-protein beta WD-40 repeat, region (…	276.282	292.036	292.036	284.05	188.706	304.437	292.036	304.437	247106_at	P	P	P	P	P	P	P	P	284.159	288.043	246.572	298.236	1.01367	0.867725	1.04954	1.20953	1.03539
247134_at	At5g66230	Chalcone-flavanone isomerase family protein; EXPRESSED IN: 19 plant structures; EXPRESSED DURING: 8 growth stages; BEST Arabidopsis thaliana protein match is: unknown protein (TAIR:AT3G51230.1); Has 1807 Blast hits to 1807 proteins in 277 species: Archae - 0; Bacteria - 0; Metazoa - 736; Fungi - 347; Plants - 385; Viruses - 0; Other Eukaryotes - 339 (source: NCBI BLink).	11.8762	11.0809	12.6407	11.5514	11.7942	11.2356	11.0809	11.7942	247134_at	A	P	A	A	A	A	A	P	11.4785	12.096	11.5149	11.4375	1.0538	1.00316	0.996427	0.993283	0.945558
247133_at	At5g66220	Chalcone-flavanone isomerase family protein; CONTAINS InterPro DOMAIN/s: Chalcone isomerase, subgroup (InterPro:IPR003466), Chalcone isomerase, 3-layer sandwich (InterPro:IPR016088), Chalcone isomerase (InterPro:IPR016087); BEST Arabidopsis thaliana protein match is: Chalcone-flavanone isomerase family protein (TAIR:AT5G66230.2); Has 378 Blast hits to 377 proteins in 81 species: Archae - 0; Bacte…	9.64646	8.33973	10.8528	10.1965	10.4107	10.1965	8.63383	9.38268	247133_at	A	A	A	A	A	A	A	A	8.99309	10.5247	10.3036	9.00825	1.1703	1.14572	1.00169	0.874281	0.855919
247137_at	At5g66210	member of Calcium Dependent Protein Kinase	96.3358	85.0359	319.573	388.023	367.093	552.565	497.999	826.001	247137_at	P	P	A	P	P	P	P	P	90.6858	353.798	459.829	662	3.90136	5.07057	7.29993	1.43967	1.87112	1
247132_at	At5g66200	Armadillo repeat protein. One of a family of four in Arabidopsis. Expressed in vegetative tissues, anthers and ovules.	77.1717	75.0614	106.891	85.6274	55.3304	106.153	99.7331	107.635	247132_at	P	P	P	P	P	P	P	P	76.1166	96.2593	80.7416	103.684	1.26463	1.06076	1.36217	1.28414	1.07713
247131_at	At5g66190	Encodes a leaf-type ferredoxin:NADP(H) oxidoreductase. It is present in both chloroplast stroma and thylakoid membranes but is more abundant in the thylakoid. The affinity of this enzyme for ferredoxin is slightly, but significantly, higher than AtLFNR2, an isoform of the same enzyme. AtLFNR1 forms a heterodimer with AtFNR2 and is also a prerequisite to attach AtFNR2 to the thylakoid membrane.	1640.59	1722.16	1606.83	1618	608.874	1770.57	1584.71	1606.83	247131_at	P	P	P	P	P	P	P	P	1681.37	1612.42	1189.72	1595.77	0.958988	0.70759	0.949086	1.34129	0.989674
247130_at	At5g66180	S-adenosyl-L-methionine-dependent methyltransferases superfamily protein; CONTAINS InterPro DOMAIN/s: Bacterial Fmu (Sun)/eukaryotic nucleolar NOL1/Nop2p (InterPro:IPR001678); Has 8827 Blast hits to 7075 proteins in 2181 species: Archae - 455; Bacteria - 6424; Metazoa - 542; Fungi - 251; Plants - 202; Viruses - 0; Other Eukaryotes - 953 (source: NCBI BLink).	195.361	167.73	202.251	176.069	270.597	160.898	186.108	172.446	247130_at	P	P	P	P	P	P	P	P	181.546	189.16	215.747	179.277	1.04194	1.18839	0.987504	0.83096	0.947754
247136_at	At5g66170	Encodes a thiosulfate sulfurtransferase/rhodanese.	372.217	415.873	173.645	308.687	294.067	421.679	390.722	445.722	247136_at	P	P	P	P	P	P	P	P	394.045	241.166	357.873	418.222	0.612027	0.908202	1.06136	1.16863	1.73417
247108_at	At5g66160	Encodes a receptor homology region transmembrane domain, ring H2 motif protein involved in transport of storage proteins to protein storage vacuoles. Co-localizes with DIP positive vesicles.	127.116	126.238	125.366	116.162	87.4266	125.366	114.563	116.162	247108_at	P	P	P	P	P	P	P	P	126.677	120.764	106.396	115.363	0.953325	0.839903	0.910686	1.08428	0.955274
247129_at	At5g66150	Glycosyl hydrolase family 38 protein; FUNCTIONS IN: in 6 functions; INVOLVED IN: mannose metabolic process, carbohydrate metabolic process; LOCATED IN: endomembrane system; EXPRESSED IN: petal, leaf whorl, sperm cell, flower; EXPRESSED DURING: 4 anthesis, petal differentiation and expansion stage; CONTAINS InterPro DOMAIN/s: Glycoside hydrolase-type carbohydrate-binding (InterPro:IPR011013), Glyc…	9.51366	7.26015	7.11074	7.26015	6.6807	7.3615	7.31065	6.9644	247129_at	A	A	A	A	A	A	A	A	8.38691	7.18545	7.0211	7.13753	0.856746	0.837151	0.851032	1.01658	0.993331
247080_at	At5g66140	Encodes alpha5 subunit of 20S proteosome complex involved in protein degradation.	121.095	128.89	128	115.36	96.3358	109.137	121.938	117.784	247080_at	P	P	P	P	P	P	P	P	124.993	121.68	102.737	119.861	0.973496	0.821939	0.958942	1.16668	0.985049
247081_at	At5g66130	Encodes a homolog to yeast RAD17. Involved in the regulation of DNA damage repair and homologous recombination. Mutant has increased sensitivity to MMS and increased telomere lengths.	55.7152	51.6251	54.9482	64.8934	43.1115	51.6251	47.8352	61.3929	247081_at	P	P	P	P	P	P	P	P	53.6702	59.9208	47.3683	54.614	1.11646	0.882581	1.01759	1.15297	0.911437
247138_at	At5g66120	3-dehydroquinate synthase, putative; FUNCTIONS IN: 3-dehydroquinate synthase activity; INVOLVED IN: aromatic amino acid family biosynthetic process; LOCATED IN: chloroplast; EXPRESSED IN: 23 plant structures; EXPRESSED DURING: 14 growth stages; CONTAINS InterPro DOMAIN/s: 3-dehydroquinate synthase AroB, subgroup (InterPro:IPR016037), 3-dehydroquinate synthase AroB (InterPro:IPR002658); Has 30201 …	167.73	177.294	155.417	177.294	188.706	188.706	206.5	222.861	247138_at	P	P	P	P	P	P	P	P	172.512	166.355	188.706	214.681	0.964311	1.09387	1.24444	1.13764	1.29049
247128_at	At5g66110	Heavy metal transport/detoxification superfamily protein ; FUNCTIONS IN: metal ion binding; INVOLVED IN: metal ion transport; LOCATED IN: plasma membrane; EXPRESSED IN: cultured cell, leaf; EXPRESSED DURING: LP.04 four leaves visible; CONTAINS InterPro DOMAIN/s: Heavy metal transport/detoxification protein (InterPro:IPR006121); BEST Arabidopsis thaliana protein match is: farnesylated protein 6 (T…	10.2674	9.91766	8.28212	9.78112	10.8528	9.98664	9.78112	10.8528	247128_at	P	A	A	A	P	M	P	P	10.0925	9.03162	10.4197	10.317	0.894881	1.03242	1.02224	0.990138	1.14232
247127_at	At5g66100	winged-helix DNA-binding transcription factor family protein; FUNCTIONS IN: molecular_function unknown; INVOLVED IN: biological_process unknown; LOCATED IN: chloroplast; EXPRESSED IN: 16 plant structures; EXPRESSED DURING: 4 anthesis, F mature embryo stage, petal differentiation and expansion stage, E expanded cotyledon stage, D bilateral stage; CONTAINS InterPro DOMAIN/s: Winged helix-turn-helix…	24.9333	24.0839	25.6342	23.1029	18.507	21.8566	23.4254	23.4254	247127_at	P	P	P	P	A	A	P	P	24.5086	24.3686	20.1818	23.4254	0.994285	0.823459	0.955802	1.16072	0.961295
247139_at	At5g66090	unknown protein; FUNCTIONS IN: molecular_function unknown; LOCATED IN: chloroplast, chloroplast stroma; EXPRESSED IN: 21 plant structures; EXPRESSED DURING: 13 growth stages; Has 30201 Blast hits to 17322 proteins in 780 species: Archae - 12; Bacteria - 1396; Metazoa - 17338; Fungi - 3422; Plants - 5037; Viruses - 0; Other Eukaryotes - 2996 (source: NCBI BLink).	79.3413	83.2859	76.1093	70.5219	58.0812	73.0089	73.0089	71.5064	247139_at	P	P	P	P	P	P	P	P	81.3136	73.3156	65.5451	72.2576	0.90164	0.806077	0.888629	1.10241	0.98557
247126_at	At5g66080	Protein phosphatase 2C family protein; FUNCTIONS IN: protein serine/threonine phosphatase activity, catalytic activity; INVOLVED IN: protein amino acid dephosphorylation; LOCATED IN: protein serine/threonine phosphatase complex; EXPRESSED IN: 16 plant structures; EXPRESSED DURING: 10 growth stages; CONTAINS InterPro DOMAIN/s: Protein phosphatase 2C, manganese/magnesium aspartate binding site (Int…	14.0257	13.0864	13.737	14.723	11.3924	18.3792	14.2215	15.0324	247126_at	P	P	P	P	P	P	A	P	13.5561	14.23	14.8858	14.6269	1.04972	1.09809	1.079	0.98261	1.02789
247125_at	At5g66070	RING/U-box superfamily protein; FUNCTIONS IN: zinc ion binding; INVOLVED IN: response to chitin; EXPRESSED IN: 23 plant structures; EXPRESSED DURING: 15 growth stages; CONTAINS InterPro DOMAIN/s: Zinc finger, RING-type (InterPro:IPR001841), Zinc finger, C3HC4 RING-type (InterPro:IPR018957); BEST Arabidopsis thaliana protein match is: NEP-interacting protein 2 (TAIR:AT2G17730.1); Has 9487 Blast hi…	101.125	99.0442	156.498	168.897	186.108	210.839	190.019	252.476	247125_at	P	P	P	P	P	P	P	P	100.085	162.697	198.474	221.247	1.6256	1.98306	2.2106	1.11474	1.35987
247124_at	At5g66060	2-oxoglutarate (2OG) and Fe(II)-dependent oxygenase superfamily protein; FUNCTIONS IN: oxidoreductase activity, acting on paired donors, with incorporation or reduction of molecular oxygen, 2-oxoglutarate as one donor, and incorporation of one atom each of oxygen into both donors, oxidoreductase activity, oxidoreductase activity, acting on paired donors, with incorporation or reduction of molecul…	55.3304	51.2685	47.8352	43.4113	13.5479	44.3235	52.7098	46.5271	247124_at	P	P	P	P	A	P	P	P	53.2994	45.6233	28.9357	49.6185	0.85598	0.54289	0.930938	1.71478	1.08757
247079_at	At5g66055	A locus involved in embryogenesis. Mutations in this locus result in embryo lethality.	128.89	112.206	112.986	99.7331	60.5477	112.206	122.786	106.153	247079_at	P	P	P	P	P	P	P	P	120.548	106.36	86.3766	114.469	0.882301	0.716533	0.949576	1.32524	1.07625
247123_at	At5g66050	Wound-responsive family protein; FUNCTIONS IN: DNA binding, nuclease activity; INVOLVED IN: nucleotide-excision repair; LOCATED IN: chloroplast; EXPRESSED IN: 24 plant structures; EXPRESSED DURING: 15 growth stages; CONTAINS InterPro DOMAIN/s: Protein of unknown function DUF151 (InterPro:IPR003729), UvrB/UvrC protein (InterPro:IPR001943); BEST Arabidopsis thaliana protein match is: Wound-responsi…	85.6274	82.7106	73.0089	65.7993	22.9433	64.4452	65.3448	62.2499	247123_at	P	P	P	P	P	P	P	P	84.169	69.4041	43.6942	63.7973	0.82458	0.519125	0.757968	1.46009	0.919216
247107_at	At5g66040	Encodes a protein with thiosulfate sulfurtransferase/rhodanese activity in vitro, however, it is likely to use a substrate other than thiosulfate or 3-mercaptopyruvate in vivo.	617.374	685.019	625.992	670.921	552.565	680.287	675.588	699.413	247107_at	P	P	P	P	P	P	P	P	651.196	648.457	616.426	687.5	0.995793	0.946606	1.05575	1.1153	1.06021
247082_at	At5g66030	Involved in golgi protein trafficking. AtARL1 binds directly to the GRIP domain of AtGRIP in a GTP-dependent manner. Localized to the golgi apparatus, tyrosine 717 in AtGRIP is crucial for Golgi localization.	147.033	154.343	163.144	165.421	137.187	147.033	162.017	152.219	247082_at	P	P	P	P	P	P	P	P	150.688	164.282	142.11	157.118	1.09021	0.943073	1.04267	1.1056	0.956387
247122_at	At5g66020	Mutants in this gene are unable to express female sterility in response to beta-aminobutyric acid, as wild type plants do. non-consensus AT donor splice site at exon 7, TA donor splice site at exon 10, AT acceptor splice at exon 13.	9.51366	9.18959	8.39773	11.3924	7.78124	8.81524	7.67411	9.00047	247122_at	A	A	A	A	A	A	A	A	9.35162	9.89507	8.29824	8.33729	1.05811	0.887358	0.891534	1.00471	0.84257
247121_at	At5g66010	RNA-binding (RRM/RBD/RNP motifs) family protein; FUNCTIONS IN: RNA binding, nucleotide binding, nucleic acid binding; INVOLVED IN: biological_process unknown; LOCATED IN: cellular_component unknown; EXPRESSED IN: 24 plant structures; EXPRESSED DURING: 15 growth stages; CONTAINS InterPro DOMAIN/s: RNA recognition motif, RNP-1 (InterPro:IPR000504), Nucleotide-binding, alpha-beta plait (InterPro:IPR…	62.2499	70.0348	79.8932	71.5064	16.1113	61.3929	69.0706	69.0706	247121_at	P	P	P	P	P	P	P	P	66.1424	75.6998	38.7521	69.0706	1.1445	0.585889	1.04427	1.78237	0.912428
247078_at	At5g66000	unknown protein; BEST Arabidopsis thaliana protein match is: unknown protein (TAIR:AT2G17540.3); Has 30201 Blast hits to 17322 proteins in 780 species: Archae - 12; Bacteria - 1396; Metazoa - 17338; Fungi - 3422; Plants - 5037; Viruses - 0; Other Eukaryotes - 2996 (source: NCBI BLink).	15.2422	14.9285	14.1232	12.3805	17.3878	12.295	14.2215	16	247078_at	A	P	A	P	P	A	P	A	15.0854	13.2519	14.8414	15.1107	0.878459	0.983826	1.00168	1.01815	1.14027
247120_at	At5g65990	Transmembrane amino acid transporter family protein; CONTAINS InterPro DOMAIN/s: Amino acid transporter, transmembrane (InterPro:IPR013057); BEST Arabidopsis thaliana protein match is: Transmembrane amino acid transporter family protein (TAIR:AT2G42005.1); Has 1807 Blast hits to 1807 proteins in 277 species: Archae - 0; Bacteria - 0; Metazoa - 736; Fungi - 347; Plants - 385; Viruses - 0; Other Eu…	53.8174	73.0089	59.7141	65.3448	45.2548	59.7141	60.9688	60.9688	247120_at	P	P	P	P	P	P	P	P	63.4131	62.5294	52.4845	60.9688	0.986065	0.827659	0.961454	1.16165	0.975042
247116_at	At5g65970	A member of a large family of seven-transmembrane domain proteins specific to plants, homologs of the barley mildew resistance locus o (MLO) protein. The Arabidopsis genome contains 15 genes encoding MLO proteins, with localization in plasma membrane. Phylogenetic analysis revealed four clades of closely-related AtMLO genes. ATMLO10 belongs to the clade III, with AtMLO5, AtMLO7, AtMLO8, and AtMLO…	13.737	14.5203	17.1484	10.9283	12.9063	13.2691	13.3614	11.7942	247116_at	P	P	P	P	P	P	P	M	14.1287	14.0383	13.0877	12.5778	0.993607	0.926321	0.890231	0.961039	0.895959
247113_at	At5g65960	GTP binding; FUNCTIONS IN: GTP binding; INVOLVED IN: small GTPase mediated signal transduction; LOCATED IN: intracellular; EXPRESSED IN: 23 plant structures; EXPRESSED DURING: 15 growth stages; CONTAINS InterPro DOMAIN/s: Mitochondrial Rho-like (InterPro:IPR013684), Alpha/gamma-adaptin-binding protein p34 (InterPro:IPR019341); Has 30201 Blast hits to 17322 proteins in 780 species: Archae - 12; Ba…	173.645	158.683	194.012	163.144	141.044	139.102	163.144	162.017	247113_at	P	P	P	P	P	P	P	P	166.164	178.578	140.073	162.58	1.07471	0.84298	0.978433	1.16068	0.910418
247112_at	At5g65950	FUNCTIONS IN: molecular_function unknown; INVOLVED IN: biological_process unknown; LOCATED IN: cellular_component unknown; EXPRESSED IN: 25 plant structures; EXPRESSED DURING: 15 growth stages; CONTAINS InterPro DOMAIN/s: Protein of unknown function DUF1683, C-terminal (InterPro:IPR012880), Foie gras liver health family 1 (InterPro:IPR021773); Has 30201 Blast hits to 17322 proteins in 780 species…	141.044	148.056	144.007	128	195.361	141.044	137.187	146.018	247112_at	P	P	P	P	P	P	P	P	144.55	136.004	168.203	141.602	0.940877	1.16363	0.979608	0.841856	1.04117
247117_at	At5g65940	hydrolyzes beta-hydroxyisobutyryl-CoA	207.937	194.012	212.306	165.421	112.986	172.446	177.294	176.069	247117_at	P	P	P	P	P	P	P	P	200.974	188.863	142.716	176.682	0.93974	0.710121	0.879126	1.238	0.935499
247115_at	At5g65930	encodes a novel member of the kinesin superfamily of motor proteins. recessive mutations have reduced number of trichome branches.	47.1766	47.1766	47.5048	47.1766	97.0059	46.8507	51.2685	43.4113	247115_at	P	P	P	P	P	P	P	P	47.1766	47.3407	71.9283	47.3399	1.00348	1.52466	1.00346	0.658154	0.999984
247114_at	At5g65910	BSD domain-containing protein; FUNCTIONS IN: molecular_function unknown; INVOLVED IN: biological_process unknown; LOCATED IN: cellular_component unknown; EXPRESSED IN: 23 plant structures; EXPRESSED DURING: 13 growth stages; CONTAINS InterPro DOMAIN/s: BSD (InterPro:IPR005607); BEST Arabidopsis thaliana protein match is: BSD domain-containing protein (TAIR:AT3G49800.1); Has 30201 Blast hits to 17…	146.018	127.116	99.7331	102.537	148.056	112.206	115.36	106.153	247114_at	P	P	P	P	P	P	P	P	136.567	101.135	130.131	110.756	0.740553	0.952873	0.811006	0.851117	1.09513
247119_at	At5g65900	DEA(D/H)-box RNA helicase family protein; FUNCTIONS IN: helicase activity, ATP-dependent helicase activity, nucleic acid binding, ATP binding; LOCATED IN: cellular_component unknown; EXPRESSED IN: 23 plant structures; EXPRESSED DURING: 13 growth stages; CONTAINS InterPro DOMAIN/s: RNA helicase, DEAD-box type, Q motif (InterPro:IPR014014), DNA/RNA helicase, DEAD/DEAH box type, N-terminal (InterPro…	22.4711	19.5622	21.4068	23.2636	22.6274	22.1618	24.9333	24.59	247119_at	P	P	P	P	P	P	P	P	21.0167	22.3352	22.3946	24.7616	1.06274	1.06556	1.17819	1.1057	1.10864
247118_at	At5g65890	Member of ACT domain containing protein family. ACT domains are amino acid binding domains. Shows strongest expression in flowers and siliques.	92.4115	98.36	87.4266	87.4266	56.1028	92.4115	69.0706	58.4852	247118_at	P	P	P	P	P	P	P	P	95.3857	87.4266	74.2571	63.7779	0.916558	0.778493	0.668631	0.858879	0.729503
247111_at	At5g65880	unknown protein; FUNCTIONS IN: molecular_function unknown; INVOLVED IN: biological_process unknown; LOCATED IN: endomembrane system; EXPRESSED IN: 21 plant structures; EXPRESSED DURING: 13 growth stages; Has 1807 Blast hits to 1807 proteins in 277 species: Archae - 0; Bacteria - 0; Metazoa - 736; Fungi - 347; Plants - 385; Viruses - 0; Other Eukaryotes - 339 (source: NCBI BLink).	41.0696	41.9326	41.3553	58.892	45.2548	40.2244	45.8866	44.6318	247111_at	A	P	P	P	P	P	P	A	41.5011	50.1237	42.7396	45.2592	1.20777	1.02984	1.09055	1.05895	0.902951
247109_at	At5g65870	Probable phytosulfokines 5 precursor, coding for a unique plant peptide growth factor.	335.461	340.144	242.191	240.518	362.039	278.204	276.282	230.72	247109_at	P	P	P	P	P	P	P	P	337.802	241.354	320.121	253.501	0.714484	0.947659	0.750443	0.791891	1.05033
247168_at	At5g65860	ankyrin repeat family protein; FUNCTIONS IN: methyltransferase activity; INVOLVED IN: metabolic process; LOCATED IN: endomembrane system; EXPRESSED IN: 21 plant structures; EXPRESSED DURING: 13 growth stages; CONTAINS InterPro DOMAIN/s: Ankyrin repeat-containing domain (InterPro:IPR020683), Arginine N-methyltransferase 2 (InterPro:IPR017408), Methyltransferase type 11 (InterPro:IPR013216), Ankyri…	64.4452	66.7178	67.6492	60.1295	115.36	50.5626	67.6492	56.8859	247168_at	P	P	P	P	P	P	P	P	65.5815	63.8893	82.9614	62.2675	0.974197	1.26501	0.949468	0.750561	0.974616
247167_at	At5g65850	F-box and associated interaction domains-containing protein; CONTAINS InterPro DOMAIN/s: F-box domain, cyclin-like (InterPro:IPR001810), F-box domain, Skp2-like (InterPro:IPR022364), F-box associated domain, type 3 (InterPro:IPR013187), F-box associated interaction domain (InterPro:IPR017451); BEST Arabidopsis thaliana protein match is: F-box and associated interaction domains-containing protein …	21.8566	21.8566	22.7848	21.5557	32.2226	20.8215	18.7654	19.4271	247167_at	P	P	P	P	P	P	P	A	21.8566	22.1703	26.522	19.0962	1.01435	1.21345	0.873704	0.720014	0.861344
247166_at	At5g65840	Thioredoxin superfamily protein; FUNCTIONS IN: oxidoreductase activity, antioxidant activity; INVOLVED IN: biological_process unknown; LOCATED IN: chloroplast stroma, chloroplast; EXPRESSED IN: 22 plant structures; EXPRESSED DURING: 13 growth stages; CONTAINS InterPro DOMAIN/s: Thioredoxin fold (InterPro:IPR012335), Alkyl hydroperoxide reductase/ Thiol specific antioxidant/ Mal allergen (InterPro…	335.461	401.707	288.015	288.015	114.563	347.291	227.544	240.518	247166_at	P	P	P	P	P	P	P	P	368.584	288.015	230.927	234.031	0.78141	0.626525	0.634946	1.01344	0.812565
247110_at	At5g65830	receptor like protein 57 (RLP57); INVOLVED IN: signal transduction; LOCATED IN: endomembrane system; EXPRESSED IN: 21 plant structures; EXPRESSED DURING: 13 growth stages; CONTAINS InterPro DOMAIN/s: Leucine-rich repeat (InterPro:IPR001611); BEST Arabidopsis thaliana protein match is: receptor like protein 44 (TAIR:AT3G49750.1); Has 1807 Blast hits to 1807 proteins in 277 species: Archae - 0; Bac…	12.295	16.5642	13.8326	12.295	11.5514	14.2215	11.7942	14.6213	247110_at	P	P	P	P	P	P	P	P	14.4296	13.0638	12.8865	13.2077	0.905346	0.893056	0.915321	1.02493	1.01102
247160_at	At5g65820	Pentatricopeptide repeat (PPR) superfamily protein; CONTAINS InterPro DOMAIN/s: Pentatricopeptide repeat (InterPro:IPR002885); BEST Arabidopsis thaliana protein match is: Tetratricopeptide repeat (TPR)-like superfamily protein (TAIR:AT3G49730.1); Has 1807 Blast hits to 1807 proteins in 277 species: Archae - 0; Bacteria - 0; Metazoa - 736; Fungi - 347; Plants - 385; Viruses - 0; Other Eukaryotes -…	6.36429	7.06162	6.54322	7.31065	7.01285	7.46426	6.27667	6.1475	247160_at	A	P	A	A	P	A	A	A	6.71296	6.92693	7.23855	6.21209	1.03188	1.0783	0.925387	0.858194	0.896802
247161_at	At5g65810	unknown protein; BEST Arabidopsis thaliana protein match is: unknown protein (TAIR:AT3G49720.2); Has 30201 Blast hits to 17322 proteins in 780 species: Archae - 12; Bacteria - 1396; Metazoa - 17338; Fungi - 3422; Plants - 5037; Viruses - 0; Other Eukaryotes - 2996 (source: NCBI BLink).	69.551	69.551	68.5935	79.3413	96.3358	62.6829	73.5167	69.551	247161_at	P	P	P	P	P	P	P	P	69.551	73.9674	79.5093	71.5339	1.0635	1.14318	1.02851	0.899691	0.9671
247159_at	At5g65800	1-aminocyclopropane-1-carboxylate synthase (ACS) is encoded by a multigene family consisting of at least five members whose expression is induced by hormones, developmental signals, and protein synthesis inhibition.	9.38268	9.84916	10.5561	9.64646	9.31787	9.71356	8.28212	9.71356	247159_at	A	A	A	A	A	A	A	A	9.61592	10.1013	9.51571	8.99784	1.05047	0.989579	0.935723	0.945577	0.890764
247165_at	At5g65790	Encodes a putative MYB transcription factor.	7.31065	7.11074	7.6211	6.58873	7.46426	7.06162	7.26015	8.81524	247165_at	A	A	A	A	A	A	A	A	7.2107	7.10492	7.26294	8.0377	0.98533	1.00725	1.11469	1.10667	1.13129
247158_at	At5g65780	encodes a chloroplast branched-chain amino acid aminotransferase, can complement the yeast leu/iso-leu/val auxotrophy mutant	122.786	130.69	128	115.36	206.5	116.97	128	101.829	247158_at	P	P	P	P	P	P	P	P	126.738	121.68	161.735	114.914	0.960094	1.27614	0.90671	0.710508	0.944398
247157_at	At5g65770	LITTLE NUCLEI4 (LINC4); EXPRESSED IN: 23 plant structures; EXPRESSED DURING: 13 growth stages; BEST Arabidopsis thaliana protein match is: branched-chain amino acid aminotransferase 5 / branched-chain amino acid transaminase 5 (BCAT5) (TAIR:AT5G65780.2); Has 215167 Blast hits to 102614 proteins in 3709 species: Archae - 2940; Bacteria - 43360; Metazoa - 90724; Fungi - 17442; Plants - 11239; Virus…	195.361	200.854	207.937	207.937	66.7178	199.466	186.108	199.466	247157_at	P	P	P	M	M	P	P	P	198.107	207.937	133.092	192.787	1.04962	0.671817	0.973146	1.44853	0.927145
247156_at	At5g65760	Serine carboxypeptidase S28 family protein; FUNCTIONS IN: serine-type peptidase activity; INVOLVED IN: proteolysis; LOCATED IN: chloroplast, vacuole; EXPRESSED IN: 23 plant structures; EXPRESSED DURING: 13 growth stages; CONTAINS InterPro DOMAIN/s: Peptidase S28 (InterPro:IPR008758); BEST Arabidopsis thaliana protein match is: alpha/beta-Hydrolases superfamily protein (TAIR:AT2G24280.1); Has 3020…	257.781	245.572	259.574	261.379	445.722	249	250.732	243.875	247156_at	P	P	P	P	P	P	P	P	251.676	260.476	347.361	247.303	1.03497	1.38019	0.982626	0.71195	0.949428
247155_at	At5g65750	2-oxoglutarate dehydrogenase, E1 component; FUNCTIONS IN: oxoglutarate dehydrogenase (succinyl-transferring) activity, cobalt ion binding, zinc ion binding; INVOLVED IN: response to cadmium ion; LOCATED IN: mitochondrion; EXPRESSED IN: 23 plant structures; EXPRESSED DURING: 11 growth stages; CONTAINS InterPro DOMAIN/s: 2-oxoglutarate dehydrogenase, E1 component (InterPro:IPR011603), Dehydrogenase…	99.7331	101.829	136.239	81.5719	156.498	105.42	110.661	99.7331	247155_at	P	P	P	P	P	P	P	P	100.781	108.906	130.959	105.197	1.08062	1.29944	1.04382	0.803283	0.965946
247162_at	At5g65730	xyloglucan endotransglucosylase/hydrolase 6 (XTH6); FUNCTIONS IN: hydrolase activity, acting on glycosyl bonds, hydrolase activity, hydrolyzing O-glycosyl compounds, xyloglucan:xyloglucosyl transferase activity; INVOLVED IN: response to water deprivation; LOCATED IN: endomembrane system, cell wall, apoplast; EXPRESSED IN: 21 plant structures; EXPRESSED DURING: 14 growth stages; CONTAINS InterPro …	20.5348	41.9326	15.7797	26.5382	19.5622	24.761	17.3878	32.4467	247162_at	P	P	A	P	P	P	A	P	31.2337	21.159	22.1616	24.9172	0.67744	0.709543	0.797767	1.12434	1.17762
247164_at	At5g65720	cysteine desulfurase whose activity is dependent on AtSufE activation.	254.232	240.518	225.972	218.275	101.125	183.546	206.5	224.411	247164_at	P	P	P	P	P	P	P	P	247.375	222.123	142.336	215.456	0.897922	0.575385	0.870969	1.51371	0.969983
247154_at	At5g65710	HAESA-like 2 (HSL2); FUNCTIONS IN: protein serine/threonine kinase activity, kinase activity, ATP binding; INVOLVED IN: transmembrane receptor protein tyrosine kinase signaling pathway, protein amino acid phosphorylation; LOCATED IN: endomembrane system; EXPRESSED IN: 22 plant structures; EXPRESSED DURING: 13 growth stages; CONTAINS InterPro DOMAIN/s: Protein kinase, ATP binding site (InterPro:IP…	63.1189	71.5064	74.5429	70.0348	76.1093	65.7993	69.0706	70.5219	247154_at	P	P	P	P	P	P	P	P	67.3126	72.2889	70.9543	69.7963	1.07393	1.0541	1.0369	0.98368	0.965519
247153_at	At5g65700	Encodes a CLAVATA1-related receptor kinase-like protein required for both shoot and flower meristem function. Very similar to BAM2,with more than 85% a.a. identity. It has a broad expression pattern and is involved in vascular strand development in the leaf, control of leaf shape, size and symmetry, male gametophyte development and ovule specification and function. Anthers of double mutants (bam1…	151.167	165.421	188.706	143.013	154.343	141.044	190.019	168.897	247153_at	P	P	P	P	P	P	P	P	158.294	165.86	147.694	179.458	1.04779	0.933033	1.1337	1.21507	1.08199
247163_at	At5g65685	UDP-Glycosyltransferase superfamily protein; FUNCTIONS IN: starch synthase activity; LOCATED IN: chloroplast; EXPRESSED IN: 24 plant structures; EXPRESSED DURING: 15 growth stages; CONTAINS InterPro DOMAIN/s: Starch synthase, catalytic domain (InterPro:IPR013534); BEST Arabidopsis thaliana protein match is: starch synthase 4 (TAIR:AT4G18240.1); Has 30201 Blast hits to 17322 proteins in 780 specie…	114.563	110.661	116.97	95.6704	230.72	130.69	118.603	130.69	247163_at	P	P	P	P	P	P	P	P	112.612	106.32	180.705	124.646	0.94413	1.60467	1.10687	0.689779	1.17237
247148_at	At5g65670	auxin (indole-3-acetic acid) induced gene	879.171	675.588	760.076	861.078	424.612	867.067	885.286	989.119	247148_at	P	P	P	P	P	P	P	P	777.38	810.577	645.839	937.202	1.0427	0.83079	1.20559	1.45114	1.15622
247149_at	At5g65660	hydroxyproline-rich glycoprotein family protein; FUNCTIONS IN: molecular_function unknown; INVOLVED IN: biological_process unknown; LOCATED IN: plasma membrane; EXPRESSED IN: 22 plant structures; EXPRESSED DURING: 13 growth stages; Has 30201 Blast hits to 17322 proteins in 780 species: Archae - 12; Bacteria - 1396; Metazoa - 17338; Fungi - 3422; Plants - 5037; Viruses - 0; Other Eukaryotes - 2996…	88.647	130.69	104.691	128	83.8652	88.647	76.6386	91.7731	247149_at	P	P	P	P	P	P	P	P	109.668	116.346	86.2561	84.2059	1.06089	0.786518	0.767824	0.976231	0.723756
247150_at	At5g65650	Protein of unknown function (DUF1195); CONTAINS InterPro DOMAIN/s: Protein of unknown function DUF1195 (InterPro:IPR010608); BEST Arabidopsis thaliana protein match is: Protein of unknown function (DUF1195) (TAIR:AT4G36660.1); Has 30201 Blast hits to 17322 proteins in 780 species: Archae - 12; Bacteria - 1396; Metazoa - 17338; Fungi - 3422; Plants - 5037; Viruses - 0; Other Eukaryotes - 2996 (sou…	19.4271	20.393	21.5557	20.393	18.8959	18.6357	20.2521	20.2521	247150_at	P	P	P	P	P	P	P	P	19.91	20.9744	18.7658	20.2521	1.05346	0.94253	1.01718	1.0792	0.965565
247151_at	At5g65640	beta HLH protein 93 (bHLH093); FUNCTIONS IN: DNA binding, sequence-specific DNA binding transcription factor activity; INVOLVED IN: regulation of transcription; LOCATED IN: nucleus; EXPRESSED IN: 22 plant structures; EXPRESSED DURING: 13 growth stages; CONTAINS InterPro DOMAIN/s: Helix-loop-helix DNA-binding domain (InterPro:IPR001092), Helix-loop-helix DNA-binding (InterPro:IPR011598); BEST Arab…	11.1579	11.6318	12.7286	13.5479	22.0087	10.8528	15.5625	12.5533	247151_at	A	P	A	A	P	A	P	P	11.3949	13.1383	16.4308	14.0579	1.153	1.44194	1.23371	0.855585	1.07
247147_at	At5g65630	This gene is predicted to encode a bromodomain-containing protein. Plant lines expressing RNAi constructs targeted against GTE7 show some resistance to agrobacterium-mediated root transformation.	232.325	205.074	288.015	172.446	51.9842	209.383	300.246	222.861	247147_at	P	P	P	P	P	P	P	P	218.699	230.23	130.684	261.553	1.05273	0.597549	1.19595	2.00143	1.13605
247152_at	At5g65620	Zincin-like metalloproteases family protein; FUNCTIONS IN: metalloendopeptidase activity; INVOLVED IN: proteolysis; LOCATED IN: cytosol, chloroplast, chloroplast stroma; EXPRESSED IN: 26 plant structures; EXPRESSED DURING: 15 growth stages; CONTAINS InterPro DOMAIN/s: Peptidase M3A/M3B, thimet/oligopeptidase F (InterPro:IPR001567); BEST Arabidopsis thaliana protein match is: Zincin-like metallopr…	187.403	186.108	167.73	150.123	150.123	153.277	159.786	159.786	247152_at	P	P	P	P	P	P	P	P	186.756	158.927	151.7	159.786	0.850987	0.812291	0.85559	1.0533	1.00541
247146_at	At5g65610	unknown protein; Has 1807 Blast hits to 1807 proteins in 277 species: Archae - 0; Bacteria - 0; Metazoa - 736; Fungi - 347; Plants - 385; Viruses - 0; Other Eukaryotes - 339 (source: NCBI BLink).	21.8566	16.9123	23.9176	17.5087	23.7524	19.0273	20.6776	19.8353	247146_at	A	P	A	M	A	A	P	P	19.3845	20.7131	21.3898	20.2565	1.06854	1.10345	1.04499	0.947014	0.977953
247145_at	At5g65600	Concanavalin A-like lectin protein kinase family protein; FUNCTIONS IN: kinase activity; INVOLVED IN: protein amino acid phosphorylation; LOCATED IN: endomembrane system; EXPRESSED IN: stem; CONTAINS InterPro DOMAIN/s: Legume lectin, beta chain (InterPro:IPR001220), Protein kinase, ATP binding site (InterPro:IPR017441), Serine/threonine-protein kinase-like domain (InterPro:IPR017442), Concanavali…	34.5353	24.2515	51.2685	53.0765	93.7015	38.8542	62.6829	48.8403	247145_at	P	P	P	P	P	P	P	P	29.3934	52.1725	66.2779	55.7616	1.77497	2.25486	1.89708	0.841331	1.06879
247144_at	At5g65590	Dof-type zinc finger DNA-binding family protein; FUNCTIONS IN: DNA binding, sequence-specific DNA binding transcription factor activity; INVOLVED IN: regulation of transcription; LOCATED IN: chloroplast; CONTAINS InterPro DOMAIN/s: Zinc finger, Dof-type (InterPro:IPR003851); BEST Arabidopsis thaliana protein match is: OBF binding protein 4 (TAIR:AT5G60850.1); Has 1807 Blast hits to 1807 proteins …	22.9433	20.6776	18.507	18.507	17.6305	19.8353	18.0009	18.507	247144_at	P	A	A	A	A	A	P	A	21.8105	18.507	18.7329	18.254	0.848538	0.858895	0.836936	0.974434	0.986327
247143_at	At5g65580	unknown protein; FUNCTIONS IN: molecular_function unknown; INVOLVED IN: biological_process unknown; LOCATED IN: endomembrane system; EXPRESSED IN: flower; EXPRESSED DURING: petal differentiation and expansion stage; Has 1807 Blast hits to 1807 proteins in 277 species: Archae - 0; Bacteria - 0; Metazoa - 736; Fungi - 347; Plants - 385; Viruses - 0; Other Eukaryotes - 339 (source: NCBI BLink).	10.1965	8.87656	7.26015	8.33973	10.8528	7.78124	8.1681	8.39773	247143_at	P	P	A	A	P	A	P	A	9.53652	7.79994	9.31704	8.28292	0.817902	0.976985	0.868547	0.889007	1.06192
247142_at	At5g65570	Tetratricopeptide repeat (TPR)-like superfamily protein; CONTAINS InterPro DOMAIN/s: Pentatricopeptide repeat (InterPro:IPR002885); BEST Arabidopsis thaliana protein match is: Pentatricopeptide repeat (PPR) superfamily protein (TAIR:AT1G11290.1); Has 1807 Blast hits to 1807 proteins in 277 species: Archae - 0; Bacteria - 0; Metazoa - 736; Fungi - 347; Plants - 385; Viruses - 0; Other Eukaryotes -…	12.295	10.4831	10.3388	9.06307	9.25351	8.75435	9.84916	10.4831	247142_at	P	P	M	P	A	P	P	P	11.3891	9.70095	9.00393	10.1662	0.851777	0.790576	0.892623	1.12908	1.04795
247141_at	At5g65560	Pentatricopeptide repeat (PPR) superfamily protein; CONTAINS InterPro DOMAIN/s: Pentatricopeptide repeat (InterPro:IPR002885); BEST Arabidopsis thaliana protein match is: Pentatricopeptide repeat (PPR) superfamily protein (TAIR:AT1G77340.1); Has 1807 Blast hits to 1807 proteins in 277 species: Archae - 0; Bacteria - 0; Metazoa - 736; Fungi - 347; Plants - 385; Viruses - 0; Other Eukaryotes - 339 …	25.4572	23.1029	23.4254	19.5622	23.2636	21.5557	22.4711	21.1121	247141_at	P	P	P	P	P	P	P	P	24.28	21.4938	22.4096	21.7916	0.885247	0.922967	0.897513	0.972421	1.01386
247172_at	At5g65550	UDP-Glycosyltransferase superfamily protein; FUNCTIONS IN: transferase activity, transferring glycosyl groups; INVOLVED IN: metabolic process; CONTAINS InterPro DOMAIN/s: UDP-glucuronosyl/UDP-glucosyltransferase (InterPro:IPR002213); BEST Arabidopsis thaliana protein match is: UDP-Glycosyltransferase superfamily protein (TAIR:AT5G49690.1); Has 1807 Blast hits to 1807 proteins in 277 species: Arch…	9.57983	10.1965	12.2101	12.4666	10.6295	12.042	9.06307	9.51366	247172_at	A	P	P	A	P	P	A	P	9.88816	12.3384	11.3357	9.28836	1.24779	1.14639	0.939342	0.819388	0.752804
247171_at	At5g65540	unknown protein; Has 6825 Blast hits to 3811 proteins in 289 species: Archae - 0; Bacteria - 184; Metazoa - 2139; Fungi - 760; Plants - 816; Viruses - 52; Other Eukaryotes - 2874 (source: NCBI BLink).	44.3235	42.5179	44.0173	38.0546	43.7133	38.0546	43.7133	39.1245	247171_at	P	P	P	P	P	P	P	P	43.4207	41.036	40.884	41.4189	0.945078	0.941577	0.953897	1.01308	1.00933
247170_at	At5g65530	Protein kinase superfamily protein; FUNCTIONS IN: protein serine/threonine kinase activity, protein kinase activity, kinase activity, ATP binding; INVOLVED IN: protein amino acid phosphorylation; LOCATED IN: cellular_component unknown; EXPRESSED IN: 16 plant structures; EXPRESSED DURING: 8 growth stages; CONTAINS InterPro DOMAIN/s: Protein kinase, ATP binding site (InterPro:IPR017441), Serine/thr…	142.025	119.428	103.25	147.033	156.498	140.07	122.786	177.294	247170_at	P	P	P	P	P	P	P	P	130.727	125.142	148.284	150.04	0.957279	1.1343	1.14774	1.01184	1.19896
247169_at	At5g65520	Tetratricopeptide repeat (TPR)-like superfamily protein; FUNCTIONS IN: binding; INVOLVED IN: biological_process unknown; LOCATED IN: cellular_component unknown; EXPRESSED IN: 23 plant structures; EXPRESSED DURING: 15 growth stages; CONTAINS InterPro DOMAIN/s: Tetratricopeptide-like helical (InterPro:IPR011990), Tetratricopeptide repeat-containing (InterPro:IPR013026), Tetratricopeptide repeat (In…	53.8174	53.4456	43.4113	53.8174	32.6724	53.0765	54.1917	51.6251	247169_at	P	P	P	P	P	P	P	P	53.6315	48.6144	42.8744	52.9084	0.906452	0.799426	0.986517	1.23403	1.08833
247196_at	At5g65510	AINTEGUMENTA-like 7 (AIL7); CONTAINS InterPro DOMAIN/s: DNA-binding, integrase-type (InterPro:IPR016177), Pathogenesis-related transcriptional factor/ERF, DNA-binding (InterPro:IPR001471); BEST Arabidopsis thaliana protein match is: AINTEGUMENTA-like 6 (TAIR:AT5G10510.2); Has 7565 Blast hits to 5160 proteins in 254 species: Archae - 0; Bacteria - 8; Metazoa - 0; Fungi - 0; Plants - 7501; Viruses …	6.1475	7.26015	7.31065	7.31065	8.1681	7.46426	6.49802	8.05564	247196_at	A	A	A	A	A	A	A	A	6.70383	7.31065	7.81618	7.27683	1.09052	1.16593	1.08547	0.930996	0.995374
247195_at	At5g65500	U-box domain-containing protein kinase family protein; FUNCTIONS IN: ubiquitin-protein ligase activity, protein serine/threonine kinase activity, protein kinase activity, kinase activity, ATP binding; INVOLVED IN: protein amino acid phosphorylation, protein ubiquitination; LOCATED IN: ubiquitin ligase complex; CONTAINS InterPro DOMAIN/s: Protein kinase, catalytic domain (InterPro:IPR000719), U bo…	7.88986	7.67411	7.06162	9.38268	7.46426	7.78124	6.63456	9.25351	247195_at	A	A	A	A	P	A	A	A	7.78199	8.22215	7.62275	7.94403	1.05656	0.979538	1.02082	1.04215	0.966174
247187_at	At5g65490	FUNCTIONS IN: molecular_function unknown; INVOLVED IN: biological_process unknown; LOCATED IN: chloroplast; EXPRESSED IN: 22 plant structures; EXPRESSED DURING: 13 growth stages; CONTAINS InterPro DOMAIN/s: SGT1 (InterPro:IPR010770); Has 1807 Blast hits to 1807 proteins in 277 species: Archae - 0; Bacteria - 0; Metazoa - 736; Fungi - 347; Plants - 385; Viruses - 0; Other Eukaryotes - 339 (source:…	39.1245	35.7532	30.91	32.8996	63.1189	33.5909	31.779	29.8571	247187_at	P	P	P	P	P	P	P	P	37.4388	31.9048	48.3549	30.818	0.852185	1.29157	0.823156	0.637329	0.965936
247194_at	At5g65480	unknown protein; FUNCTIONS IN: molecular_function unknown; INVOLVED IN: biological_process unknown; LOCATED IN: chloroplast; EXPRESSED IN: 24 plant structures; EXPRESSED DURING: 15 growth stages; BEST Arabidopsis thaliana protein match is: unknown protein (TAIR:AT4G38060.2); Has 1807 Blast hits to 1807 proteins in 277 species: Archae - 0; Bacteria - 0; Metazoa - 736; Fungi - 347; Plants - 385; Vi…	903.888	942.272	699.413	661.685	530.056	714.109	625.992	588.134	247194_at	P	P	P	P	P	P	P	P	923.08	680.549	622.082	607.063	0.737259	0.67392	0.657649	0.975856	0.89202
247186_at	At5g65470	O-fucosyltransferase family protein; CONTAINS InterPro DOMAIN/s: GDP-fucose protein O-fucosyltransferase (InterPro:IPR019378); BEST Arabidopsis thaliana protein match is: O-fucosyltransferase family protein (TAIR:AT4G24530.1); Has 30201 Blast hits to 17322 proteins in 780 species: Archae - 12; Bacteria - 1396; Metazoa - 17338; Fungi - 3422; Plants - 5037; Viruses - 0; Other Eukaryotes - 2996 (sou…	109.137	168.897	126.238	210.839	369.646	330.842	174.853	300.246	247186_at	P	P	P	P	P	P	P	P	139.017	168.539	350.244	237.549	1.21236	2.51943	1.70878	0.67824	1.40947		1
247185_at	At5g65460	Kinesin that binds cyclin-dependent kinase CDKA;1 as homodimer or as heterodimer with KCA1	33.5909	32	34.7755	25.2813	44.9422	32	30.0647	27.6652	247185_at	P	P	P	P	P	P	P	P	32.7955	30.0284	38.4711	28.865	0.915627	1.17306	0.880151	0.750302	0.961255
247184_at	At5g65450	Encodes a ubiquitin-specific protease.	26.1729	28.6408	29.2426	30.0647	38.3193	25.9921	26.1729	24.9333	247184_at	P	P	P	P	P	P	P	P	27.4068	29.6537	32.1557	25.5531	1.08198	1.17327	0.932361	0.794667	0.861717
247183_at	At5g65440	unknown protein; INVOLVED IN: biological_process unknown; EXPRESSED IN: 22 plant structures; EXPRESSED DURING: 13 growth stages; BEST Arabidopsis thaliana protein match is: unknown protein (TAIR:AT4G24610.1).	22.6274	23.5883	22.9433	19.6983	25.8125	19.2929	23.2636	26.3549	247183_at	P	P	P	P	P	P	P	P	23.1079	21.3208	22.5527	24.8092	0.922664	0.975977	1.07363	1.10005	1.16362
247188_at	At5g65430	member of 14-3-3 proteins. This protein is reported to interact with the BZR1 transcription factor involved in brassinosteroid signaling and may affect the nucleocytoplasmic shuttling of BZR1	873.098	781.445	792.353	765.363	533.742	891.444	948.826	929.3	247188_at	P	P	P	P	P	P	P	P	827.271	778.858	712.593	939.063	0.941478	0.861378	1.13513	1.31781	1.20569
247190_at	At5g65420	Encodes a D-type cyclin CYCD4;1 that physically interacts with CDC2A and is expressed during vascular tissue development, embryogenesis, and formation of lateral root primordia. Its expression is upregulated early during germination.Involved in stomatal cell lineage proliferation in the hypocotyl.	7.06162	6.23332	6.77396	6.77396	6.63456	6.63456	6.72717	6.9644	247190_at	A	P	P	P	P	P	P	A	6.64747	6.77396	6.63456	6.84579	1.01903	0.998057	1.02983	1.03184	1.0106
247182_at	At5g65410	Encodes ZFHD2, a member of the zinc finger homeodomain transcriptional factor family.	14.2215	15.6707	13.2691	14.6213	12.9063	13.8326	13.2691	14.3204	247182_at	A	A	A	A	A	A	A	A	14.9461	13.9452	13.3694	13.7948	0.933033	0.89451	0.922967	1.03181	0.989211
247189_at	At5g65390	arabinogalactan protein 7 (AGP7); BEST Arabidopsis thaliana protein match is: arabinogalactan protein 4 (TAIR:AT5G10430.1); Has 30201 Blast hits to 17322 proteins in 780 species: Archae - 12; Bacteria - 1396; Metazoa - 17338; Fungi - 3422; Plants - 5037; Viruses - 0; Other Eukaryotes - 2996 (source: NCBI BLink).	10.8528	13.3614	11.0043	13.2691	13.6422	11.7942	16.2234	18.6357	247189_at	A	P	A	A	P	A	P	M	12.1071	12.1367	12.7182	17.4295	1.00245	1.05047	1.43961	1.37045	1.4361
247193_at	At5g65380	MATE efflux family protein; FUNCTIONS IN: antiporter activity, drug transmembrane transporter activity, transporter activity; INVOLVED IN: drug transmembrane transport, ripening, transmembrane transport; LOCATED IN: membrane; EXPRESSED IN: 22 plant structures; EXPRESSED DURING: 13 growth stages; CONTAINS InterPro DOMAIN/s: Multi antimicrobial extrusion protein MatE (InterPro:IPR002528); BEST Arab…	125.366	171.255	100.427	125.366	104.691	139.102	88.0347	101.125	247193_at	P	P	P	P	P	P	P	P	148.31	112.896	121.897	94.58	0.761217	0.821904	0.637717	0.775902	0.83776
247181_at	At5g65370	ENTH/ANTH/VHS superfamily protein; FUNCTIONS IN: phospholipid binding, binding; INVOLVED IN: biological_process unknown; LOCATED IN: cellular_component unknown; EXPRESSED IN: 6 plant structures; EXPRESSED DURING: 6 growth stages; CONTAINS InterPro DOMAIN/s: Epsin-like, N-terminal (InterPro:IPR013809), ANTH (InterPro:IPR011417), ENTH/VHS (InterPro:IPR008942); BEST Arabidopsis thaliana protein matc…	7.3615	7.83536	7.51618	7.1602	8.63383	7.06162	6.82108	7.56846	247181_at	A	A	A	A	P	P	P	A	7.59843	7.33819	7.84772	7.19477	0.965751	1.03281	0.946876	0.916797	0.980456
247192_at	At5g65360	Histone superfamily protein; FUNCTIONS IN: DNA binding; INVOLVED IN: nucleosome assembly; LOCATED IN: chloroplast, nucleosome; EXPRESSED IN: 23 plant structures; EXPRESSED DURING: 14 growth stages; CONTAINS InterPro DOMAIN/s: Histone H3 (InterPro:IPR000164), Histone-fold (InterPro:IPR009072), Histone core (InterPro:IPR007125); BEST Arabidopsis thaliana protein match is: Histone superfamily protei…	84.4485	81.0084	82.7106	66.257	74.028	60.5477	97.0059	76.1093	247192_at	P	P	P	P	P	P	P	P	82.7285	74.4838	67.2879	86.5576	0.90034	0.813358	1.04629	1.28638	1.1621
247180_at	At5g65350	histone 3 11 (HTR11); FUNCTIONS IN: DNA binding; INVOLVED IN: nucleosome assembly; LOCATED IN: nucleosome; EXPRESSED IN: 8 plant structures; EXPRESSED DURING: 6 growth stages; CONTAINS InterPro DOMAIN/s: Histone H3 (InterPro:IPR000164), Histone-fold (InterPro:IPR009072), Histone core (InterPro:IPR007125); BEST Arabidopsis thaliana protein match is: Histone superfamily protein (TAIR:AT5G10400.1); …	7.1602	7.26015	6.54322	7.06162	7.72749	6.45313	6.86852	7.4127	247180_at	P	A	A	A	A	A	A	A	7.21018	6.80242	7.09031	7.14061	0.943447	0.983376	0.990352	1.00709	1.04972
247179_at	At5g65320	basic helix-loop-helix (bHLH) DNA-binding superfamily protein; FUNCTIONS IN: DNA binding, sequence-specific DNA binding transcription factor activity; INVOLVED IN: regulation of transcription; LOCATED IN: nucleus; EXPRESSED IN: hypocotyl, root, leaf; EXPRESSED DURING: LP.04 four leaves visible, LP.10 ten leaves visible, 4 leaf senescence stage; CONTAINS InterPro DOMAIN/s: Helix-loop-helix DNA-bin…	7.94474	6.9644	8.1681	7.21	7.67411	7.94474	7.56846	8.33973	247179_at	A	A	P	A	P	P	P	P	7.45457	7.68905	7.80943	7.95409	1.03145	1.0476	1.06701	1.01852	1.03447
247191_at	At5g65310	Encodes a class I HDZip (homeodomain-leucine zipper) protein that is a positive regulator of ABA-responsiveness, mediating the inhibitory effect of ABA on growth during seedling establishment.	73.5167	59.3016	50.5626	45.2548	33.3589	51.9842	61.8199	51.2685	247191_at	P	P	P	P	P	P	P	P	66.4092	47.9087	42.6715	56.5442	0.721418	0.642555	0.851452	1.3251	1.18025
247177_at	At5g65300	unknown protein; Has 30201 Blast hits to 17322 proteins in 780 species: Archae - 12; Bacteria - 1396; Metazoa - 17338; Fungi - 3422; Plants - 5037; Viruses - 0; Other Eukaryotes - 2996 (source: NCBI BLink).	22.4711	14.6213	49.5221	58.0812	92.4115	75.0614	113.772	121.938	247177_at	P	P	P	P	P	P	P	P	18.5462	53.8017	83.7365	117.855	2.90095	4.51502	6.35465	1.40745	2.19054	1	1	1		1
247198_at	At5g65290	LMBR1-like membrane protein; FUNCTIONS IN: molecular_function unknown; INVOLVED IN: biological_process unknown; LOCATED IN: endomembrane system, integral to membrane; EXPRESSED IN: 23 plant structures; EXPRESSED DURING: 15 growth stages; CONTAINS InterPro DOMAIN/s: LMBR1-like membrane protein, conserved region (InterPro:IPR006876); Has 1807 Blast hits to 1807 proteins in 277 species: Archae - 0; …	27.0958	28.0514	23.4254	31.3414	47.1766	28.0514	28.443	27.8576	247198_at	P	P	P	P	P	P	P	P	27.5736	27.3834	37.614	28.1503	0.993102	1.36413	1.02091	0.748399	1.02801
247175_at	At5g65280	Encodes a protein with reported similarity to GCR2 a putative G protein coupled receptor thought to be an ABA receptor. Loss of function mutations in GCL1 show no ABA response defects based on assays of seed germination and seedling development.GCL1 also has similarity to LANCL1 and LANCL2, human homologs of bacterial lanthionine synthetase.	60.1295	103.25	89.8845	107.635	70.5219	94.3532	73.0089	83.2859	247175_at	P	P	P	P	P	P	P	P	81.6898	98.7596	82.4376	78.1474	1.20896	1.00915	0.956636	0.947958	0.791289
247202_at	At5g65270	RAB GTPase homolog A4A (RABA4a); FUNCTIONS IN: GTP binding; INVOLVED IN: protein transport, small GTPase mediated signal transduction; LOCATED IN: plasma membrane, membrane; EXPRESSED IN: 24 plant structures; EXPRESSED DURING: 13 growth stages; CONTAINS InterPro DOMAIN/s: Ras GTPase (InterPro:IPR001806), Small GTP-binding protein (InterPro:IPR005225), Small GTPase (InterPro:IPR020851), Ras (Inter…	170.072	156.498	151.167	173.645	158.683	162.017	171.255	184.823	247202_at	P	P	P	P	P	P	P	P	163.285	162.406	160.35	178.039	0.994619	0.982024	1.09036	1.11032	1.09626
247173_at	At5g65260	RNA-binding (RRM/RBD/RNP motifs) family protein; FUNCTIONS IN: RNA binding, nucleotide binding, nucleic acid binding; INVOLVED IN: biological_process unknown; LOCATED IN: cellular_component unknown; EXPRESSED IN: 23 plant structures; EXPRESSED DURING: 13 growth stages; CONTAINS InterPro DOMAIN/s: RNA recognition motif, RNP-1 (InterPro:IPR000504), Nucleotide-binding, alpha-beta plait (InterPro:IPR…	385.343	344.892	415.873	352.139	354.588	364.557	398.932	354.588	247173_at	P	P	P	P	P	P	P	P	365.117	384.006	359.572	376.76	1.05173	0.984813	1.03189	1.0478	0.981131
247174_at	At5g65250	unknown protein; FUNCTIONS IN: molecular_function unknown; INVOLVED IN: biological_process unknown; LOCATED IN: chloroplast; EXPRESSED IN: 22 plant structures; EXPRESSED DURING: 13 growth stages; Has 30201 Blast hits to 17322 proteins in 780 species: Archae - 12; Bacteria - 1396; Metazoa - 17338; Fungi - 3422; Plants - 5037; Viruses - 0; Other Eukaryotes - 2996 (source: NCBI BLink).	122.786	123.64	144.007	145.009	96.3358	120.259	131.599	139.102	247174_at	P	P	P	P	P	P	P	P	123.213	144.508	108.297	135.35	1.17283	0.878945	1.09851	1.2498	0.936627
247197_at	At5g65240	Leucine-rich repeat protein kinase family protein; FUNCTIONS IN: kinase activity; INVOLVED IN: protein amino acid phosphorylation; EXPRESSED IN: 22 plant structures; EXPRESSED DURING: 12 growth stages; CONTAINS InterPro DOMAIN/s: Protein kinase, ATP binding site (InterPro:IPR017441), Serine/threonine-protein kinase domain (InterPro:IPR002290), Leucine-rich repeat (InterPro:IPR001611), Leucine-ric…	85.6274	85.0359	83.8652	81.5719	52.3457	84.4485	101.125	112.206	247197_at	P	P	P	P	P	P	P	P	85.3316	82.7185	68.3971	106.665	0.969377	0.801545	1.25001	1.5595	1.2895
247231_at	At5g65230	Member of the R2R3 factor gene family.	10.3388	10.1965	8.9383	11.0043	11.0809	10.3388	8.22491	10.1261	247231_at	M	P	P	A	M	P	P	P	10.2677	9.97132	10.7098	9.17548	0.971139	1.04307	0.89363	0.856733	0.920188
247201_at	At5g65220	Ribosomal L29 family protein ; FUNCTIONS IN: structural constituent of ribosome; INVOLVED IN: translation, ribosome biogenesis; LOCATED IN: ribosome, chloroplast stroma, chloroplast, nucleoid, chloroplast envelope; EXPRESSED IN: 22 plant structures; EXPRESSED DURING: 13 growth stages; CONTAINS InterPro DOMAIN/s: Ribosomal protein L29 (InterPro:IPR001854); Has 1807 Blast hits to 1807 proteins in 2…	436.549	377.413	451.944	354.588	122.786	451.944	369.646	359.538	247201_at	P	P	P	P	P	P	P	P	406.981	403.266	287.365	364.592	0.990872	0.706089	0.895845	1.26874	0.904098
247199_at	At5g65210	Encodes TGA1, a redox-controlled regulator of systemic acquired resistance. TGA1 targets the activation sequence-1 (as-1) element of the promoter region of defense proteins. TGA1 are S-nitrosylated.	28.2465	39.9466	33.1285	32.2226	39.3966	35.261	32.2226	30.0647	247199_at	P	P	P	P	P	P	P	P	34.0965	32.6755	37.3288	31.1437	0.958324	1.0948	0.913396	0.834306	0.953119
247178_at	At5g65205	NAD(P)-binding Rossmann-fold superfamily protein; FUNCTIONS IN: oxidoreductase activity, binding, catalytic activity; INVOLVED IN: oxidation reduction, metabolic process; LOCATED IN: cellular_component unknown; EXPRESSED IN: 18 plant structures; EXPRESSED DURING: 13 growth stages; CONTAINS InterPro DOMAIN/s: Short-chain dehydrogenase/reductase, conserved site (InterPro:IPR020904), NAD(P)-binding …	44.0173	32.6724	50.2134	39.3966	47.1766	46.2057	45.5696	45.5696	247178_at	P	P	P	P	P	P	P	P	38.3449	44.805	46.6912	45.5696	1.16847	1.21766	1.18841	0.975979	1.01707
247203_at	At5g65180	ENTH/VHS family protein; CONTAINS InterPro DOMAIN/s: Protein of unknown function DUF618 (InterPro:IPR006903), RNA polymerase II, large subunit, CTD (InterPro:IPR006569), ENTH/VHS (InterPro:IPR008942); BEST Arabidopsis thaliana protein match is: ENTH/VHS family protein (TAIR:AT5G10060.1); Has 30201 Blast hits to 17322 proteins in 780 species: Archae - 12; Bacteria - 1396; Metazoa - 17338; Fungi - …	33.8246	35.5062	33.8246	34.2968	66.257	30.91	38.0546	32.6724	247203_at	P	P	P	P	P	P	P	P	34.6654	34.0607	48.5835	35.3635	0.982555	1.4015	1.02014	0.727892	1.03825
247230_at	At5g65170	VQ motif-containing protein; CONTAINS InterPro DOMAIN/s: VQ (InterPro:IPR008889); BEST Arabidopsis thaliana protein match is: VQ motif-containing protein (TAIR:AT1G35830.1); Has 1807 Blast hits to 1807 proteins in 277 species: Archae - 0; Bacteria - 0; Metazoa - 736; Fungi - 347; Plants - 385; Viruses - 0; Other Eukaryotes - 339 (source: NCBI BLink).	48.1679	46.2057	36.7583	26.3549	65.7993	36.2523	36.5044	32.4467	247230_at	P	P	P	P	P	P	P	P	47.1868	31.5566	51.0258	34.4756	0.668759	1.08136	0.730619	0.67565	1.0925
247229_at	At5g65160	Encodes one of the 36 carboxylate clamp (CC)-tetratricopeptide repeat (TPR) proteins (Prasad 2010, Pubmed ID: 20856808) with potential to interact with Hsp90/Hsp70 as co-chaperones.	20.2521	18.8959	19.2929	20.8215	16.5642	19.4271	18.3792	17.3878	247229_at	A	A	A	A	A	A	A	A	19.574	20.0572	17.9957	17.8835	1.02469	0.919367	0.913634	0.993764	0.891623
247228_at	At5g65140	Haloacid dehalogenase-like hydrolase (HAD) superfamily protein; FUNCTIONS IN: catalytic activity, trehalose-phosphatase activity; INVOLVED IN: response to cadmium ion, trehalose biosynthetic process; EXPRESSED IN: 21 plant structures; EXPRESSED DURING: 14 growth stages; CONTAINS InterPro DOMAIN/s: HAD-superfamily hydrolase, subfamily IIB (InterPro:IPR006379), Trehalose-phosphatase (InterPro:IPR00…	51.9842	48.5029	70.0348	39.9466	33.8246	44.6318	49.18	44.9422	247228_at	P	P	P	P	P	P	P	P	50.2435	54.9907	39.2282	47.0611	1.09448	0.780761	0.93666	1.19968	0.855802
247227_at	At5g65130	encodes a member of the DREB subfamily A-6 of ERF/AP2 transcription factor family. The protein contains one AP2 domain. There are 8 members in this subfamily including RAP2.4.	11.3137	11.3137	9.38268	11.6318	13.3614	12.7286	10.1965	12.4666	247227_at	A	P	A	A	A	A	A	P	11.3137	10.5072	13.045	11.3316	0.928717	1.15303	1.00158	0.868652	1.07845
247200_at	At5g65120	unknown protein; BEST Arabidopsis thaliana protein match is: unknown protein (TAIR:AT5G10110.1); Has 30201 Blast hits to 17322 proteins in 780 species: Archae - 12; Bacteria - 1396; Metazoa - 17338; Fungi - 3422; Plants - 5037; Viruses - 0; Other Eukaryotes - 2996 (source: NCBI BLink).	11.5514	9.91766	12.1257	10.2674	12.3805	10.1261	11.6318	11.0043	247200_at	A	P	P	A	P	A	P	P	10.7345	11.1966	11.2533	11.3181	1.04304	1.04832	1.05436	1.00576	1.01085
247176_at	At5g65110	Encodes an acyl-CoA oxidase presumably involved in long chain fatty acid biosynthesis.	173.645	164.279	186.108	124.5	265.028	130.69	158.683	121.095	247176_at	P	P	P	P	P	P	P	P	168.962	155.304	197.859	139.889	0.919167	1.17103	0.827932	0.707015	0.900742
247226_at	At5g65100	Ethylene insensitive 3 family protein; FUNCTIONS IN: sequence-specific DNA binding transcription factor activity; INVOLVED IN: regulation of transcription; LOCATED IN: nucleus; EXPRESSED IN: flower; EXPRESSED DURING: petal differentiation and expansion stage; CONTAINS InterPro DOMAIN/s: Ethylene insensitive 3 (InterPro:IPR006957); BEST Arabidopsis thaliana protein match is: Ethylene insensitive 3…	5.85634	5.93809	5.46416	6.10504	5.93809	6.23332	5.9794	6.19026	247226_at	A	A	A	A	A	P	A	A	5.89722	5.7846	6.08571	6.08483	0.980903	1.03196	1.03181	0.999856	1.0519
247225_at	At5g65090	Encodes a protein involved in root hair morphogenesis and tip growth. Required for restricting both the size of the root-hair initiation site and the width of the root hairs during the transition to tip growth, but, apparently, is not required for normal subsequent tip growth.	9.44794	7.72749	6.9163	8.1681	8.63383	7.6211	7.11074	8.63383	247225_at	P	A	A	A	P	A	A	P	8.58772	7.5422	8.12746	7.87228	0.878254	0.946406	0.916691	0.968603	1.04377
247224_at	At5g65080	Is upregulated during vernalization and regulates flowering time. Encodes MADS-domain protein. Two variants encoding proteins of 198 and 184 amino acids have been reported.	9.25351	10.5561	14.42	12.1257	13.4543	14.1232	12.9063	14.42	247224_at	A	P	P	P	P	A	A	A	9.90478	13.2729	13.7888	13.6631	1.34005	1.39213	1.37945	0.990887	1.0294
247223_at	At5g65070	Encodes MADS-box containing FLC paralog. Five splice variants have been identified but not characterized with respect to expression patterns and/or differing function. Overexpression of the gene in the Landsberg ecotype leads to a delay in flowering, transcript levels of MAF4 are reduced after a 6 week vernalization.	7.51618	8.22491	9.51366	8.33973	7.56846	7.72749	10.4107	7.46426	247223_at	A	P	P	A	A	A	P	A	7.87055	8.92669	7.64798	8.9375	1.13419	0.971721	1.13556	1.16861	1.00121
247217_s_at	At5g65050	Originally published as Agamous like MADS-box protein AGL31. One of a group of MADS box genes involved in control of flowering time. Four variant sequences have been identified for this locus but have not been characterized for differences in expression pattern and/or function.	103.25	100.427	91.1392	101.125	56.1028	85.6274	106.153	86.8227	247217_s_at	P	A	P	P	P	P	P	A	101.838	96.1323	70.8651	96.4878	0.943968	0.695858	0.947459	1.36157	1.0037
247212_at	At5g65040	Protein of unknown function (DUF581); CONTAINS InterPro DOMAIN/s: Protein of unknown function DUF581 (InterPro:IPR007650); BEST Arabidopsis thaliana protein match is: Protein of unknown function (DUF581) (TAIR:AT1G22160.1); Has 1807 Blast hits to 1807 proteins in 277 species: Archae - 0; Bacteria - 0; Metazoa - 736; Fungi - 347; Plants - 385; Viruses - 0; Other Eukaryotes - 339 (source: NCBI BLin…	621.668	467.882	760.076	467.882	704.277	497.999	749.612	537.455	247212_at	P	P	P	P	P	P	P	P	544.775	613.979	601.138	643.533	1.12703	1.10346	1.18128	1.07052	1.04814
247210_at	At5g65020	Annexins are calcium binding proteins that are localized in the cytoplasm. When cytosolic Ca2+ increases, they relocate to the plasma membrane. They may be involved in the Golgi-mediated secretion of polysaccharides.	74.5429	117.784	80.4489	90.5097	205.074	84.4485	114.563	102.537	247210_at	P	P	P	P	P	P	P	P	96.1635	85.4793	144.761	108.55	0.888895	1.50537	1.12881	0.749856	1.2699
247218_at	At5g65010	Encodes asparagine synthetase (ASN2).	14.5203	14.0257	15.1369	15.3482	13.0864	15.8895	15.8895	14.5203	247218_at	P	P	A	P	P	P	P	P	14.273	15.2426	14.488	15.2049	1.06793	1.01506	1.06529	1.04949	0.997528
247207_at	At5g65000	Nucleotide-sugar transporter family protein; FUNCTIONS IN: nucleotide-sugar transmembrane transporter activity, sugar:hydrogen symporter activity; INVOLVED IN: carbohydrate transport, nucleotide-sugar transport; LOCATED IN: integral to membrane, Golgi membrane; EXPRESSED IN: 24 plant structures; EXPRESSED DURING: 15 growth stages; CONTAINS InterPro DOMAIN/s: Nucleotide-sugar transporter (InterPro…	222.861	200.854	257.781	213.783	374.806	198.088	250.732	196.72	247207_at	P	P	P	P	P	P	P	P	211.857	235.782	286.447	223.726	1.11293	1.35208	1.05602	0.781037	0.948869
247204_at	At5g64990	RAB GTPase homolog H1A (RABH1a); FUNCTIONS IN: GTP binding, GTPase activity; INVOLVED IN: intracellular protein transport, signal transduction, nucleocytoplasmic transport, protein transport, small GTPase mediated signal transduction; LOCATED IN: mitochondrion; EXPRESSED IN: 20 plant structures; EXPRESSED DURING: 12 growth stages; CONTAINS InterPro DOMAIN/s: Ran GTPase (InterPro:IPR002041), Ras (…	9.71356	10.7779	9.18959	7.6211	10.1965	9.18959	10.7779	8.9383	247204_at	P	P	P	P	P	P	P	P	10.2457	8.40535	9.69304	9.85808	0.820377	0.946058	0.962167	1.01703	1.17283
247234_at	At5g64980	unknown protein; BEST Arabidopsis thaliana protein match is: unknown protein (TAIR:AT4G02880.1); Has 1807 Blast hits to 1807 proteins in 277 species: Archae - 0; Bacteria - 0; Metazoa - 736; Fungi - 347; Plants - 385; Viruses - 0; Other Eukaryotes - 339 (source: NCBI BLink).	10.3388	9.44794	10.0561	10.0561	11.4716	10.2674	10.0561	8.63383	247234_at	P	A	A	A	P	A	P	A	9.89338	10.0561	10.8695	9.34497	1.01645	1.09867	0.944567	0.85974	0.929283
247233_at	At5g64970	Mitochondrial substrate carrier family protein; FUNCTIONS IN: binding, transporter activity; INVOLVED IN: transport, mitochondrial transport, transmembrane transport; LOCATED IN: mitochondrion, mitochondrial inner membrane, plastid; EXPRESSED IN: 24 plant structures; EXPRESSED DURING: 13 growth stages; CONTAINS InterPro DOMAIN/s: Mitochondrial carrier protein (InterPro:IPR002067), Mitochondrial s…	34.2968	27.6652	31.3414	35.5062	31.3414	32.6724	30.6965	30.0647	247233_at	P	P	P	P	P	P	P	P	30.981	33.4238	32.0069	30.3806	1.07885	1.03312	0.980621	0.949188	0.90895
247220_at	At5g64960	Encodes CDKC;2, part of a CDKC kinase complex that is targeted by Cauliflower mosaic virus (CaMV) for transcriptional activation of viral genes. Also regulates plant growth and development. Co-localizes with spliceosomal components in a manner dependent on the transcriptional status of the cells and on CDKC2-kinase activity. Expression of CDKC2 modifies the location of spliceosomal components.	170.072	196.72	158.683	195.361	89.2636	152.219	159.786	178.527	247220_at	P	P	P	P	P	P	P	P	183.396	177.022	120.741	169.157	0.965244	0.658363	0.922358	1.40099	0.95557
247206_at	At5g64950	Mitochondrial transcription termination factor family protein; FUNCTIONS IN: molecular_function unknown; INVOLVED IN: biological_process unknown; LOCATED IN: mitochondrion; EXPRESSED IN: 23 plant structures; EXPRESSED DURING: 13 growth stages; CONTAINS InterPro DOMAIN/s: Mitochodrial transcription termination factor-related (InterPro:IPR003690); BEST Arabidopsis thaliana protein match is: Mitocho…	43.1115	35.7532	52.3457	37.5307	49.8665	32.8996	43.7133	42.5179	247206_at	P	P	P	P	P	P	P	P	39.4323	44.9382	41.3831	43.1156	1.13963	1.04947	1.09341	1.04187	0.959442
247232_at	At5g64940	Encodes a member of ATH subfamily of ATP-binding cassette (ABC) proteins.	235.568	274.374	168.897	243.875	178.527	254.232	145.009	194.012	247232_at	P	P	P	P	P	P	P	P	254.971	206.386	216.379	169.51	0.80945	0.848643	0.664822	0.783394	0.821326
247259_at	At5g64930	Regulator of expression of pathogenesis-related (PR) genes. Participates in signal transduction pathways involved in plant defense (systemic acquired resistance -SAR).	120.259	146.018	124.5	118.603	183.546	123.64	116.162	127.116	247259_at	P	P	P	P	P	P	P	P	133.138	121.552	153.593	121.639	0.912972	1.15364	0.91363	0.791957	1.00072
247219_at	At5g64920	Encodes a RING-H2 protein that interacts with the RING finger domain of COP1. CIP8 exhibits a strong interaction with the E2 ubiquitin conjugating enzyme AtUBC8 through its N-terminal domain and promotes ubiquitination in an E2-dependent fashion in vitro. It is possible that the AtUBC8-CIP8 module might interact with COP1 in vivo, thereby participating in proteasome-mediated degradation of HY5.	70.5219	70.5219	67.1819	54.9482	53.8174	60.9688	72.5046	68.5935	247219_at	P	P	P	P	P	P	P	P	70.5219	61.065	57.3931	70.549	0.865901	0.813833	1.00038	1.22923	1.15531
247215_at	At5g64905	elicitor peptide 3 precursor (PROPEP3); Has 30201 Blast hits to 17322 proteins in 780 species: Archae - 12; Bacteria - 1396; Metazoa - 17338; Fungi - 3422; Plants - 5037; Viruses - 0; Other Eukaryotes - 2996 (source: NCBI BLink).	8.81524	10.8528	8.87656	12.9063	18.7654	25.1067	17.3878	31.3414	247215_at	A	A	A	P	P	P	A	P	9.83404	10.8914	21.936	24.3646	1.10752	2.23062	2.47758	1.11071	2.23705
247213_at	At5g64900	Encodes a putative 92-aa protein that is the precursor of AtPep1, a 23-aa peptide which activates transcription of the defensive gene defensin (PDF1.2) and activates the synthesis of H2O2, both being components of the innate immune response.	9.64646	14.42	16	13.3614	17.5087	18.7654	17.0299	29.0406	247213_at	A	P	P	A	P	P	P	P	12.0332	14.6807	18.137	23.0353	1.22001	1.50724	1.9143	1.27007	1.56908
247205_at	At5g64890	elicitor peptide 2 precursor (PROPEP2); BEST Arabidopsis thaliana protein match is: precursor of peptide 1 (TAIR:AT5G64900.1); Has 30201 Blast hits to 17322 proteins in 780 species: Archae - 12; Bacteria - 1396; Metazoa - 17338; Fungi - 3422; Plants - 5037; Viruses - 0; Other Eukaryotes - 2996 (source: NCBI BLink).	8	7.06162	7.06162	7.78124	8.11168	7.83536	7.26015	7.94474	247205_at	A	A	A	A	A	A	A	A	7.53081	7.42143	7.97352	7.60245	0.985476	1.05879	1.00951	0.953462	1.02439
247211_at	At5g64880	unknown protein; Has 30201 Blast hits to 17322 proteins in 780 species: Archae - 12; Bacteria - 1396; Metazoa - 17338; Fungi - 3422; Plants - 5037; Viruses - 0; Other Eukaryotes - 2996 (source: NCBI BLink).	91.1392	93.7015	91.7731	104.691	80.4489	99.0442	103.968	97.6806	247211_at	P	P	P	P	P	P	P	P	92.4203	98.2323	89.7465	100.824	1.06289	0.971069	1.09093	1.12344	1.02639
247208_at	At5g64870	SPFH/Band 7/PHB domain-containing membrane-associated protein family; FUNCTIONS IN: molecular_function unknown; INVOLVED IN: biological_process unknown; LOCATED IN: plasma membrane, vacuole; EXPRESSED IN: 18 plant structures; EXPRESSED DURING: 11 growth stages; CONTAINS InterPro DOMAIN/s: Band 7 protein (InterPro:IPR001107); BEST Arabidopsis thaliana protein match is: SPFH/Band 7/PHB domain-conta…	13.6422	12.9063	26.9087	29.446	49.5221	42.2243	31.125	50.9143	247208_at	A	A	P	P	P	P	P	P	13.2742	28.1773	45.8732	41.0196	2.12271	3.45581	3.09018	0.894197	1.45577	1	1	1
247216_at	At5g64860	Encodes a maltotriose-metabolizing enzyme with chloroplastic &#945;-1,4-glucanotransferase activity. Mutant has altered starch degradation.	181.019	170.072	209.383	166.572	164.279	192.672	199.466	186.108	247216_at	P	P	P	P	P	P	P	P	175.546	187.977	178.475	192.787	1.07082	1.01669	1.09822	1.08019	1.02559
247214_at	At5g64850	FUNCTIONS IN: molecular_function unknown; INVOLVED IN: biological_process unknown; LOCATED IN: plasma membrane; EXPRESSED IN: 22 plant structures; EXPRESSED DURING: 13 growth stages; CONTAINS InterPro DOMAIN/s: RPM1-interacting protein 4, defence response (InterPro:IPR008700); BEST Arabidopsis thaliana protein match is: unknown protein (TAIR:AT5G09960.1); Has 30201 Blast hits to 17322 proteins in…	71.5064	67.6492	62.2499	96.3358	112.986	135.298	83.2859	124.5	247214_at	P	P	P	P	P	P	P	P	69.5778	79.2929	124.142	103.893	1.13963	1.78422	1.49319	0.836886	1.31024
247222_at	At5g64840	member of GCN subfamily	648.067	982.286	497.999	724.077	418.766	760.076	533.742	719.076	247222_at	P	P	P	P	P	P	P	P	815.177	611.038	589.421	626.409	0.749578	0.723059	0.768433	1.06275	1.02516
247209_at	At5g64830	programmed cell death 2 C-terminal domain-containing protein; FUNCTIONS IN: molecular_function unknown; INVOLVED IN: apoptosis; LOCATED IN: cytoplasm; EXPRESSED IN: 22 plant structures; EXPRESSED DURING: 13 growth stages; CONTAINS InterPro DOMAIN/s: Programmed cell death protein 2, C-terminal (InterPro:IPR007320); BEST Arabidopsis thaliana protein match is: zinc finger (MYND type) family protein …	61.8199	56.1028	56.493	56.1028	56.493	54.1917	54.1917	45.8866	247209_at	P	P	P	P	P	P	P	P	58.9613	56.2979	55.3423	50.0391	0.954827	0.938621	0.848677	0.904174	0.888828
247258_at	At5g64816	unknown protein; Has 30201 Blast hits to 17322 proteins in 780 species: Archae - 12; Bacteria - 1396; Metazoa - 17338; Fungi - 3422; Plants - 5037; Viruses - 0; Other Eukaryotes - 2996 (source: NCBI BLink).	73.5167	54.1917	53.0765	65.7993	77.1717	49.8665	63.1189	60.1295	247258_at	P	P	P	P	P	P	P	P	63.8542	59.4379	63.5191	61.6242	0.930837	0.994752	0.965076	0.970167	1.03678
247221_at	At5g64813	The LIP1 gene encodes a small GTPase that influences the light input pathway of the plant circadian network. An MBP:LIP1 fusion protein has GTP hydrolyzing abilities in vitro. In plants, LIP1 seems to play a negative role in regulating circadian period that can be suppressed by light. LIP1 also seems to negatively affect light-pulse-dependent resetting of the clock, especially during the first po…	72.0037	79.3413	78.7932	94.3532	114.563	82.1393	74.028	77.7085	247221_at	P	P	P	P	P	P	P	P	75.6725	86.5732	98.3512	75.8683	1.14405	1.2997	1.00259	0.771401	0.876348
247254_at	At5g64800	Member of a large family of putative ligands homologous to the Clavata3 gene. Consists of a single exon.	35.5062	30.0647	41.9326	33.1285	41.9326	29.6508	37.7918	31.125	247254_at	P	A	P	P	P	P	P	P	32.7855	37.5305	35.7917	34.4584	1.14473	1.09169	1.05103	0.962747	0.918142
247253_at	At5g64790	O-Glycosyl hydrolases family 17 protein; FUNCTIONS IN: cation binding, hydrolase activity, hydrolyzing O-glycosyl compounds, catalytic activity; INVOLVED IN: carbohydrate metabolic process; LOCATED IN: anchored to membrane; EXPRESSED IN: 7 plant structures; EXPRESSED DURING: L mature pollen stage, M germinated pollen stage, 4 anthesis, petal differentiation and expansion stage; CONTAINS InterPro …	14.0257	11.4716	12.042	11.5514	8.9383	12.8171	12.1257	11.7127	247253_at	A	A	A	A	A	A	A	A	12.7487	11.7967	10.8777	11.9192	0.925328	0.853243	0.934938	1.09575	1.01038
247255_at	At5g64780	Uncharacterised conserved protein UCP009193; CONTAINS InterPro DOMAIN/s: Uncharacterised conserved protein UCP009193 (InterPro:IPR016549); BEST Arabidopsis thaliana protein match is: Uncharacterised conserved protein UCP009193 (TAIR:AT4G09830.1); Has 1807 Blast hits to 1807 proteins in 277 species: Archae - 0; Bacteria - 0; Metazoa - 736; Fungi - 347; Plants - 385; Viruses - 0; Other Eukaryotes -…	30.0647	21.8566	22.4711	23.4254	21.8566	16.3362	19.4271	22.9433	247255_at	P	P	P	P	P	P	P	P	25.9607	22.9482	19.0964	21.1852	0.883961	0.73559	0.816049	1.10938	0.923173
247252_at	At5g64770	Encodes a root meristem growth factor (RGF). Belongs to a family of functionally redundant homologous peptides that are secreted, tyrosine-sulfated, and expressed mainly in the stem cell area and the innermost layer of central columella cells. RGFs are required for maintenance of the root stem cell niche and transit amplifying cell proliferation. Members of this family include: At5g60810 (RGF1), …	103.968	48.8403	100.427	128	56.1028	69.0706	103.25	79.8932	247252_at	P	P	P	P	P	P	P	P	76.4043	114.213	62.5867	91.5717	1.49486	0.819151	1.19851	1.46312	0.801759
247257_at	At5g64760	Encodes one of two isoforms for the 26S proteasome regulatory protein (RN) subunit RPN5. For many functions it acts redundantly with the paralogous genes RPN5a.	31.125	36.2523	29.446	30.4844	72.0037	34.2968	33.5909	33.8246	247257_at	P	P	P	P	P	P	P	P	33.6886	29.9652	53.1502	33.7078	0.889476	1.57769	1.00057	0.634198	1.1249
247251_at	At5g64740	Encodes a cellulose synthase isomer. CESA6 mutants have cellulose defect in the primary cell wall. Multiple lines of evidence suggest that CESA6, along with CESA1 and CESA3 are present in the same plasma membrane complex for cellulose biosynthesis. CESA2 and CESA5 are related to CESA6, having partially redundant roles. As inferred from the null role of secondary wall-type CesAs, included in a set…	333.144	445.722	274.374	340.144	296.112	333.144	312.996	413.001	247251_at	P	P	P	P	P	P	P	P	389.433	307.259	314.628	362.998	0.788991	0.807913	0.932121	1.15374	1.18141
247256_at	At5g64730	Transducin/WD40 repeat-like superfamily protein; CONTAINS InterPro DOMAIN/s: WD40 repeat 2 (InterPro:IPR019782), WD40 repeat, conserved site (InterPro:IPR019775), WD40 repeat (InterPro:IPR001680), G-protein beta WD-40 repeat, region (InterPro:IPR020472), WD40 repeat-like-containing domain (InterPro:IPR011046), WD40-repeat-containing domain (InterPro:IPR017986), WD40/YVTN repeat-like-containing do…	70.5219	75.5835	73.0089	66.7178	51.2685	62.2499	74.028	76.1093	247256_at	P	P	P	P	P	P	P	P	73.0527	69.8633	56.7592	75.0686	0.956341	0.776962	1.0276	1.32258	1.07451
247245_at	At5g64720	Protein of unknown function (DUF1278); FUNCTIONS IN: molecular_function unknown; INVOLVED IN: biological_process unknown; LOCATED IN: endomembrane system; EXPRESSED IN: embryo; EXPRESSED DURING: C globular stage; CONTAINS InterPro DOMAIN/s: Protein of unknown function DUF1278 (InterPro:IPR010701); BEST Arabidopsis thaliana protein match is: Protein of unknown function (DUF1278) (TAIR:AT2G21740.1)…	8.05564	7.21	8	7.3615	7.67411	8.28212	6.9644	7.31065	247245_at	A	A	A	A	A	A	A	A	7.63282	7.68075	7.97812	7.13753	1.00628	1.04524	0.93511	0.894638	0.929275
247244_at	At5g64710	Putative endonuclease or glycosyl hydrolase; BEST Arabidopsis thaliana protein match is: Putative endonuclease or glycosyl hydrolase (TAIR:AT5G09840.1); Has 1807 Blast hits to 1807 proteins in 277 species: Archae - 0; Bacteria - 0; Metazoa - 736; Fungi - 347; Plants - 385; Viruses - 0; Other Eukaryotes - 339 (source: NCBI BLink).	8.11168	7.01285	7.72749	8.39773	8.1681	6.86852	7.56846	7.67411	247244_at	P	A	A	A	A	A	A	A	7.56226	8.06261	7.51831	7.62129	1.06616	0.994188	1.00781	1.0137	0.945263
247243_at	At5g64700	nodulin MtN21 /EamA-like transporter family protein; FUNCTIONS IN: molecular_function unknown; LOCATED IN: membrane; EXPRESSED IN: 10 plant structures; EXPRESSED DURING: 4 anthesis, C globular stage, petal differentiation and expansion stage; CONTAINS InterPro DOMAIN/s: Protein of unknown function DUF6, transmembrane (InterPro:IPR000620); BEST Arabidopsis thaliana protein match is: nodulin MtN21 …	12.042	12.042	15.0324	12.042	12.5533	9.91766	12.5533	11.3137	247243_at	P	P	P	P	A	A	A	A	12.042	13.5372	11.2355	11.9335	1.12417	0.933028	0.990994	1.06213	0.881538
247242_at	At5g64690	neurofilament triplet H protein-related; Has 1807 Blast hits to 1807 proteins in 277 species: Archae - 0; Bacteria - 0; Metazoa - 736; Fungi - 347; Plants - 385; Viruses - 0; Other Eukaryotes - 339 (source: NCBI BLink).	6.32033	6.19026	6.10504	6.02099	6.45313	6.32033	7.3615	5.73582	247242_at	A	A	A	A	A	A	A	A	6.2553	6.06301	6.38673	6.54866	0.969261	1.02101	1.0469	1.02535	1.0801
247241_at	At5g64680	unknown protein; FUNCTIONS IN: molecular_function unknown; INVOLVED IN: biological_process unknown; EXPRESSED IN: 22 plant structures; EXPRESSED DURING: 13 growth stages; Has 53 Blast hits to 53 proteins in 20 species: Archae - 0; Bacteria - 8; Metazoa - 8; Fungi - 0; Plants - 34; Viruses - 0; Other Eukaryotes - 3 (source: NCBI BLink).	82.1393	69.0706	108.383	101.125	121.938	79.8932	105.42	73.5167	247241_at	P	P	P	P	P	P	P	P	75.6049	104.754	100.915	89.4682	1.38555	1.33477	1.18336	0.886566	0.854076
247249_at	At5g64670	Ribosomal protein L18e/L15 superfamily protein; FUNCTIONS IN: structural constituent of ribosome; INVOLVED IN: translation, ribosome biogenesis; LOCATED IN: ribosome, large ribosomal subunit; EXPRESSED IN: 20 plant structures; EXPRESSED DURING: 12 growth stages; CONTAINS InterPro DOMAIN/s: Ribosomal protein L18e/L15 (InterPro:IPR021131), Ribosomal protein L15, bacterial-type (InterPro:IPR005749);…	78.249	72.0037	81.5719	80.4489	76.1093	73.5167	93.7015	83.8652	247249_at	P	P	P	A	A	P	P	P	75.1264	81.0104	74.813	88.7833	1.07832	0.995829	1.18179	1.18674	1.09595
247240_at	At5g64660	CYS, MET, PRO, and GLY protein 2 (CMPG2); FUNCTIONS IN: ubiquitin-protein ligase activity, binding; INVOLVED IN: response to chitin; LOCATED IN: ubiquitin ligase complex; EXPRESSED IN: 23 plant structures; EXPRESSED DURING: 11 growth stages; CONTAINS InterPro DOMAIN/s: U box domain (InterPro:IPR003613), Armadillo-like helical (InterPro:IPR011989), Armadillo-type fold (InterPro:IPR016024); BEST Ar…	35.7532	34.5353	51.9842	67.1819	117.784	88.0347	93.0542	125.366	247240_at	P	P	P	P	P	P	P	P	35.1442	59.583	102.909	109.21	1.69538	2.9282	3.10748	1.06123	1.83291		1	1
247247_at	At5g64650	Ribosomal protein L17 family protein; FUNCTIONS IN: structural constituent of ribosome; INVOLVED IN: translation; LOCATED IN: ribosome, intracellular; EXPRESSED IN: 21 plant structures; EXPRESSED DURING: 13 growth stages; CONTAINS InterPro DOMAIN/s: Ribosomal protein L17 (InterPro:IPR000456); BEST Arabidopsis thaliana protein match is: Ribosomal protein L17 family protein (TAIR:AT5G09770.1); Has …	36.7583	39.9466	36.7583	31.5594	44.9422	34.5353	39.9466	37.5307	247247_at	P	P	P	P	P	P	P	P	38.3525	34.1589	39.7388	38.7386	0.890657	1.03615	1.01007	0.974833	1.13407
247239_at	At5g64640	Plant invertase/pectin methylesterase inhibitor superfamily; FUNCTIONS IN: enzyme inhibitor activity, pectinesterase activity; INVOLVED IN: cell wall modification; LOCATED IN: plasma membrane, plant-type cell wall; EXPRESSED IN: 24 plant structures; EXPRESSED DURING: 15 growth stages; CONTAINS InterPro DOMAIN/s: Pectin lyase fold/virulence factor (InterPro:IPR011050), Pectinesterase, catalytic (I…	15.1369	18.2522	16.3362	15.2422	21.1121	19.4271	17.8766	19.8353	247239_at	P	P	P	A	P	P	P	P	16.6946	15.7892	20.2696	18.856	0.945769	1.21414	1.12947	0.930257	1.19423
247250_at	At5g64630	Chromatin Assembly Factor-1 (CAF-1) p60 subunit. Involved in organization of the shoot and root apical meristems. In Arabidopsis, the three CAF-1 subunits are encoded by FAS1, FAS2 and, most likely, MSI1, respectively. Mutations in FAS1 or FAS2 lead to increased frequency of homologous recombination and T-DNA integration in Arabidopsis.	15.0324	14.9285	14.3204	17.6305	18.0009	13.737	15.5625	12.5533	247250_at	P	P	P	P	P	P	A	P	14.9804	15.9754	15.869	14.0579	1.06642	1.05931	0.938417	0.885873	0.87997
247246_at	At5g64620	Plant cell wall (CWI) and vacuolar invertases (VI) play important roles in carbohydrate metabolism, stress responses and sugar signaling.	100.427	95.6704	96.3358	75.0614	109.137	78.249	107.635	98.36	247246_at	P	P	P	P	P	P	P	P	98.0486	85.6986	93.6931	102.997	0.874043	0.955579	1.05047	1.09931	1.20186
247238_at	At5g64610	Encodes an enzyme with histone acetyltransferase activity. HAM1 primarily acetylate histone H4, but also display some ability to acetylate H3. Prior acetylation of lysine 5 on histone H4 reduces radioactive acetylation by either HAM1. HAM1 acetylates histone H4 lysine 5.	64.8934	65.7993	63.5579	69.551	96.3358	61.3929	68.5935	58.4852	247238_at	P	P	P	P	P	P	P	P	65.3463	66.5545	78.8643	63.5394	1.01849	1.20687	0.972348	0.805679	0.954697
247237_at	At5g64600	O-fucosyltransferase family protein; CONTAINS InterPro DOMAIN/s: GDP-fucose protein O-fucosyltransferase (InterPro:IPR019378); BEST Arabidopsis thaliana protein match is: O-fucosyltransferase family protein (TAIR:AT1G22460.1); Has 35333 Blast hits to 34131 proteins in 2444 species: Archae - 798; Bacteria - 22429; Metazoa - 974; Fungi - 991; Plants - 531; Viruses - 0; Other Eukaryotes - 9610 (sour…	61.8199	45.5696	41.0696	41.9326	29.2426	41.9326	45.5696	47.1766	247237_at	P	P	P	P	P	P	P	P	53.6948	41.5011	35.5876	46.3731	0.772908	0.662776	0.863643	1.30307	1.11739
247236_at	At5g64590	BEST Arabidopsis thaliana protein match is: Putative endonuclease or glycosyl hydrolase (TAIR:AT3G62200.1); Has 1807 Blast hits to 1807 proteins in 277 species: Archae - 0; Bacteria - 0; Metazoa - 736; Fungi - 347; Plants - 385; Viruses - 0; Other Eukaryotes - 339 (source: NCBI BLink).	7.83536	7.3615	8.33973	8.57419	10.4831	9.71356	7.46426	7.94474	247236_at	P	A	A	A	A	A	A	A	7.59843	8.45696	10.0984	7.7045	1.11299	1.329	1.01396	0.762946	0.911025
247235_at	At5g64580	AAA-type ATPase family protein; FUNCTIONS IN: nucleoside-triphosphatase activity, metalloendopeptidase activity, nucleotide binding, ATP binding; INVOLVED IN: embryo development; LOCATED IN: chloroplast, chloroplast envelope; EXPRESSED IN: 21 plant structures; EXPRESSED DURING: 13 growth stages; CONTAINS InterPro DOMAIN/s: ATPase, AAA-type, core (InterPro:IPR003959), ATPase, AAA+ type, core (Inte…	25.2813	25.9921	24.59	23.7524	43.4113	27.6652	24.2515	17.2677	247235_at	P	P	P	P	P	P	P	P	25.6367	24.1712	35.5383	20.7596	0.942835	1.38623	0.809759	0.584147	0.858855
247266_at	At5g64570	Encodes a beta-d-xylosidase that belongs to family 3 of glycoside hydrolases.	91.1392	198.088	78.7932	97.6806	60.5477	93.0542	95.6704	94.3532	247266_at	P	P	P	P	P	P	P	P	144.614	88.2369	76.801	95.0118	0.610156	0.531076	0.657004	1.23712	1.07678
247248_at	At5g64560	Transmembrane magnesium transporter. One of 9 family members.	86.2229	95.6704	80.4489	53.4456	78.7932	68.5935	78.7932	61.3929	247248_at	P	P	P	P	P	P	P	P	90.9467	66.9472	73.6934	70.0931	0.736116	0.810292	0.770705	0.951145	1.04699
247265_at	At5g64550	loricrin-related; BEST Arabidopsis thaliana protein match is: loricrin-related (TAIR:AT5G09670.1); Has 1807 Blast hits to 1807 proteins in 277 species: Archae - 0; Bacteria - 0; Metazoa - 736; Fungi - 347; Plants - 385; Viruses - 0; Other Eukaryotes - 339 (source: NCBI BLink).	369.646	481.036	328.557	352.139	238.856	312.996	308.687	312.996	247265_at	P	P	P	P	P	P	P	P	425.341	340.348	275.926	310.841	0.800177	0.648718	0.730805	1.12654	0.913305
247264_at	At5g64530	xylem NAC domain 1 (XND1); CONTAINS InterPro DOMAIN/s: No apical meristem (NAM) protein (InterPro:IPR003441); BEST Arabidopsis thaliana protein match is: NAC domain containing protein 25 (TAIR:AT1G61110.1); Has 2741 Blast hits to 2738 proteins in 73 species: Archae - 0; Bacteria - 0; Metazoa - 0; Fungi - 0; Plants - 2741; Viruses - 0; Other Eukaryotes - 0 (source: NCBI BLink).	101.125	120.259	188.706	91.7731	61.3929	84.4485	83.8652	50.2134	247264_at	P	P	P	P	P	P	P	P	110.692	140.24	72.9207	67.0393	1.26694	0.658771	0.605637	0.919345	0.478033
247294_at	At5g64520	Encodes a protein of the XRCC2 family involved in DNA repair. atxrcc2-1 Mutants are sensitive to MitomycinC but do not show fertility defects.	12.5533	14.2215	13.6422	14.1232	18.8959	14.0257	13.6422	11.7942	247294_at	A	A	A	A	P	A	P	A	13.3874	13.8827	16.4608	12.7182	1.037	1.22957	0.950008	0.772634	0.916115
247293_at	At5g64510	unknown protein; FUNCTIONS IN: molecular_function unknown; INVOLVED IN: biological_process unknown; LOCATED IN: endomembrane system; EXPRESSED IN: 17 plant structures; EXPRESSED DURING: 10 growth stages; Has 35333 Blast hits to 34131 proteins in 2444 species: Archae - 798; Bacteria - 22429; Metazoa - 974; Fungi - 991; Plants - 531; Viruses - 0; Other Eukaryotes - 9610 (source: NCBI BLink).	13.3614	11.5514	11.2356	14.42	15.7797	11.1579	10.3388	12.295	247293_at	P	P	P	P	P	P	A	P	12.4564	12.8278	13.4688	11.3169	1.02981	1.08128	0.90852	0.840229	0.882219
247260_at	At5g64500	Major facilitator superfamily protein; FUNCTIONS IN: molecular_function unknown; INVOLVED IN: transmembrane transport; LOCATED IN: membrane; EXPRESSED IN: 24 plant structures; EXPRESSED DURING: 15 growth stages; CONTAINS InterPro DOMAIN/s: Major facilitator superfamily (InterPro:IPR020846), Major facilitator superfamily MFS-1 (InterPro:IPR011701), Major facilitator superfamily, general substrate …	206.5	210.839	182.278	170.072	364.557	177.294	184.823	179.769	247260_at	P	P	P	P	P	P	P	P	208.67	176.175	270.925	182.296	0.844277	1.29835	0.87361	0.672864	1.03474
247292_at	At5g64490	ARM repeat superfamily protein; FUNCTIONS IN: binding; INVOLVED IN: biological_process unknown; LOCATED IN: cellular_component unknown; CONTAINS InterPro DOMAIN/s: Armadillo-like helical (InterPro:IPR011989), Armadillo-type fold (InterPro:IPR016024); BEST Arabidopsis thaliana protein match is: pumilio 22 (TAIR:AT1G01410.1); Has 1807 Blast hits to 1807 proteins in 277 species: Archae - 0; Bacteria…	10.6295	9.18959	10.1261	9.12611	9.06307	10.1965	7.46426	8.45614	247292_at	P	P	P	P	A	P	A	P	9.90954	9.62608	9.62978	7.9602	0.971396	0.971769	0.803287	0.826624	0.826941
247291_at	At5g64480	unknown protein; Has 35333 Blast hits to 34131 proteins in 2444 species: Archae - 798; Bacteria - 22429; Metazoa - 974; Fungi - 991; Plants - 531; Viruses - 0; Other Eukaryotes - 9610 (source: NCBI BLink).	33.8246	30.4844	28.84	26.9087	33.5909	32.4467	28.84	27.8576	247291_at	P	P	P	P	P	P	P	P	32.1545	27.8744	33.0188	28.3488	0.866888	1.02688	0.881644	0.858565	1.01702
247263_at	At5g64470	Encodes a member of the TBL (TRICHOME BIREFRINGENCE-LIKE) gene family containing a plant-specific DUF231 (domain of unknown function) domain. TBL gene family has 46 members, two of which (TBR/AT5G06700 and TBL3/AT5G01360) have been shown to be involved in the synthesis and deposition of secondary wall cellulose, presumably by influencing the esterification state of pectic polymers. A nomenclature…	44.0173	41.0696	36.0019	41.9326	43.7133	36.7583	35.7532	26.9087	247263_at	P	P	P	P	P	P	P	P	42.5435	38.9672	40.2358	31.3309	0.915939	0.945757	0.736445	0.778683	0.804033
247261_at	At5g64460	Phosphoglycerate mutase family protein; CONTAINS InterPro DOMAIN/s: Histidine phosphatase superfamily, clade-1 (InterPro:IPR013078); BEST Arabidopsis thaliana protein match is: Phosphoglycerate mutase family protein (TAIR:AT1G58280.1); Has 1807 Blast hits to 1807 proteins in 277 species: Archae - 0; Bacteria - 0; Metazoa - 736; Fungi - 347; Plants - 385; Viruses - 0; Other Eukaryotes - 339 (sourc…	182.278	205.074	190.019	174.853	272.479	199.466	229.126	203.657	247261_at	P	P	P	P	P	P	P	P	193.676	182.436	235.972	216.392	0.941965	1.21839	1.11729	0.917022	1.18612
247290_at	At5g64450	BEST Arabidopsis thaliana protein match is: Putative endonuclease or glycosyl hydrolase (TAIR:AT3G62200.1); Has 1807 Blast hits to 1807 proteins in 277 species: Archae - 0; Bacteria - 0; Metazoa - 736; Fungi - 347; Plants - 385; Viruses - 0; Other Eukaryotes - 339 (source: NCBI BLink).	21.8566	16.2234	17.2677	20.5348	26.1729	25.6342	20.1122	23.5883	247290_at	P	P	P	P	M	P	P	P	19.04	18.9012	25.9036	21.8503	0.992712	1.36048	1.1476	0.843524	1.15602
247262_at	At5g64440	AtFAAH (fatty acid amide hydrolase) modulates endogenous NAEs (N-Acylethanolamines) levels in plants by hydrolyzing NAEs to ethanolamine and their corresponding free fatty acids. NAE depletion likely participates in the regulation of plant growth.	104.691	120.259	101.829	104.691	146.018	92.4115	98.36	94.3532	247262_at	P	P	P	P	P	P	P	P	112.475	103.26	119.215	96.3566	0.91807	1.05992	0.856692	0.808262	0.933145
247277_at	At5g64420	DNA polymerase V family; FUNCTIONS IN: DNA-directed DNA polymerase activity, DNA binding; INVOLVED IN: DNA replication, transcription; LOCATED IN: cellular_component unknown; EXPRESSED IN: 23 plant structures; EXPRESSED DURING: 13 growth stages; CONTAINS InterPro DOMAIN/s: DNA polymerase V (InterPro:IPR007015); Has 1807 Blast hits to 1807 proteins in 277 species: Archae - 0; Bacteria - 0; Metazoa…	51.6251	56.493	57.68	54.1917	81.0084	50.9143	61.8199	58.4852	247277_at	P	P	P	P	P	P	P	P	54.059	55.9359	65.9614	60.1526	1.03472	1.22017	1.11272	0.911936	1.07538
247284_at	At5g64410	oligopeptide transporter	59.7141	65.7993	67.1819	62.6829	50.9143	58.892	55.3304	61.8199	247284_at	P	P	P	P	P	P	P	P	62.7567	64.9324	54.9032	58.5752	1.03467	0.874858	0.933369	1.06688	0.902095
247285_at	At5g64400	BEST Arabidopsis thaliana protein match is: Cox19-like CHCH family protein (TAIR:AT5G09570.1); Has 127 Blast hits to 125 proteins in 40 species: Archae - 0; Bacteria - 9; Metazoa - 16; Fungi - 2; Plants - 64; Viruses - 0; Other Eukaryotes - 36 (source: NCBI BLink).	1606.83	1770.57	1758.34	1807.78	1176.27	1884.54	1710.26	1746.2	247285_at	P	P	P	P	P	P	P	P	1688.7	1783.06	1530.41	1728.23	1.05588	0.906263	1.02341	1.12926	0.969249
247276_at	At5g64390	encodes a K homology (KH) domain-containing, putative RNA binding protein that interacts with HUA1, a CCCH zinc finger RNA binding protein in the nucleus. HEN4 acts redundantly with HUA1 and HUA2 in the specification of floral organ identity in the third whorl.	40.2244	35.261	33.5909	37.7918	38.3193	30.0647	29.2426	32.2226	247276_at	P	P	P	P	P	P	P	P	37.7427	35.6913	34.192	30.7326	0.945649	0.905924	0.814266	0.898823	0.861066
247278_at	At5g64380	Inositol monophosphatase family protein; FUNCTIONS IN: phosphoric ester hydrolase activity; INVOLVED IN: carbohydrate metabolic process; LOCATED IN: chloroplast; EXPRESSED IN: 21 plant structures; EXPRESSED DURING: 13 growth stages; CONTAINS InterPro DOMAIN/s: Fructose-1,6-bisphosphatase (InterPro:IPR000146); BEST Arabidopsis thaliana protein match is: high cyclic electron flow 1 (TAIR:AT3G54050.…	65.3448	67.6492	58.0812	61.8199	81.0084	65.7993	51.6251	48.1679	247278_at	P	P	P	P	P	P	P	P	66.497	59.9506	73.4039	49.8965	0.901554	1.10387	0.750357	0.679753	0.832294
247275_at	At5g64370	PYD3 encodes a beta-ureidopropionase which, when expressed in E. coli, has been shown to convert beta-ureidopropionate into beta-alanine. It localizes to the cytosol and plays an important role in uracil degradation.	304.437	304.437	256	249	418.766	280.139	250.732	238.856	247275_at	P	P	P	P	P	P	P	P	304.437	252.5	349.453	244.794	0.829399	1.14786	0.804088	0.700507	0.969482
247274_at	At5g64360	Chaperone DnaJ-domain superfamily protein; FUNCTIONS IN: heat shock protein binding; INVOLVED IN: protein folding; LOCATED IN: cellular_component unknown; EXPRESSED IN: 21 plant structures; EXPRESSED DURING: 13 growth stages; CONTAINS InterPro DOMAIN/s: Molecular chaperone, heat shock protein, Hsp40, DnaJ (InterPro:IPR015609), Heat shock protein DnaJ, N-terminal (InterPro:IPR001623); BEST Arabido…	33.5909	25.4572	30.91	27.6652	21.5557	25.6342	27.4741	26.1729	247274_at	P	P	P	P	P	P	P	P	29.5241	29.2876	23.595	26.8235	0.99199	0.799179	0.90853	1.13683	0.915865
247281_at	At5g64350	FK506-binding protein 12 (FKBP12); FUNCTIONS IN: FK506 binding, peptidyl-prolyl cis-trans isomerase activity; INVOLVED IN: protein folding; LOCATED IN: chloroplast thylakoid lumen; EXPRESSED IN: 24 plant structures; EXPRESSED DURING: 14 growth stages; CONTAINS InterPro DOMAIN/s: Peptidyl-prolyl cis-trans isomerase, FKBP-type (InterPro:IPR001179); BEST Arabidopsis thaliana protein match is: FKBP-l…	1541.37	1509.65	1541.37	1606.83	1509.65	1530.73	1758.34	1584.71	247281_at	P	P	P	P	P	P	P	P	1525.51	1574.1	1520.19	1671.52	1.03185	0.99651	1.09571	1.09955	1.06189
247273_at	At5g64340	Encodes a bHLH(basic helix-loop-helix)-type transcription factor SAC51 [suppressor of acaulis 51]. Upregulation of SAC51 reverses the dwarf phenotype caused by a loss-of-function mutation in ACL5 (Arabidopsis thaliana ACAULIS 5) gene, suggesting that activation of SAC51 may lead to the expression of a subset of genes required for stem elongation.	50.9143	44.3235	46.8507	35.5062	53.0765	34.0598	42.2243	38.0546	247273_at	P	P	P	P	P	P	P	P	47.6189	41.1785	43.5681	40.1394	0.86475	0.914934	0.842931	0.921302	0.974767
247288_at	At5g64330	Involved in blue light response signaling pathway; interacts with the blue light photoreceptor NPH1.Null mutations abolish phototrophic responses of etiolated seedlings to low fluence blue light. Protein contains multiple protein-protein interaction domains.	11.7127	12.4666	11.7942	11.4716	11.1579	12.5533	13.8326	11.3137	247288_at	P	P	P	P	P	P	P	P	12.0897	11.6329	11.8556	12.5732	0.962219	0.980644	1.03999	1.06052	1.08083
247279_at	At5g64310	Encodes arabinogalactan-protein (AGP1).	18.0009	26.3549	57.2816	78.7932	136.239	162.017	88.647	176.069	247279_at	P	P	P	P	P	P	P	P	22.1779	68.0374	149.128	132.358	3.0678	6.72417	5.96801	0.887547	1.94537		1	1
247272_at	At5g64300	encodes GTP cyclohydrolase II that can functionally complement E. coli mutant deficient in this gene. It also has 3,4-dihydroxy-2-butanone-4-phosphate synthase activity which makes it a bifunctional enzyme involved in the formation of the pyrimidine and of the carbohydrate from GTP and ribulose-5-phosphate, respectively	216.767	195.361	276.282	256	117.784	266.871	333.144	315.173	247272_at	P	P	P	P	P	P	P	P	206.064	266.141	192.328	324.158	1.29155	0.933339	1.5731	1.68545	1.21799
247289_at	At5g64290	dicarboxylate transport 2.1 (DIT2.1); FUNCTIONS IN: oxoglutarate:malate antiporter activity; INVOLVED IN: malate transport, response to nematode; LOCATED IN: chloroplast, membrane, chloroplast envelope; EXPRESSED IN: 23 plant structures; EXPRESSED DURING: 13 growth stages; CONTAINS InterPro DOMAIN/s: Sodium/sulphate symporter (InterPro:IPR001898); BEST Arabidopsis thaliana protein match is: dicar…	190.019	212.306	171.255	155.417	256	182.278	165.421	158.683	247289_at	P	P	P	P	P	P	P	P	201.162	163.336	219.139	162.052	0.81196	1.08936	0.805577	0.739493	0.992139
247286_at	At5g64280	dicarboxylate transporter 2.2 (DiT2.2); FUNCTIONS IN: oxoglutarate:malate antiporter activity; INVOLVED IN: malate transport, sodium ion transport, transmembrane transport; LOCATED IN: chloroplast, membrane; EXPRESSED IN: 23 plant structures; EXPRESSED DURING: 13 growth stages; CONTAINS InterPro DOMAIN/s: Sodium/sulphate symporter (InterPro:IPR001898); BEST Arabidopsis thaliana protein match is: …	93.7015	114.563	78.7932	95.0095	76.1093	86.2229	79.3413	79.8932	247286_at	P	P	P	P	P	P	P	P	104.132	86.9014	81.1661	79.6172	0.834528	0.779451	0.764577	0.980917	0.916179
247271_at	At5g64270	splicing factor, putative; FUNCTIONS IN: binding; INVOLVED IN: mRNA processing; LOCATED IN: chloroplast; EXPRESSED IN: 26 plant structures; EXPRESSED DURING: 15 growth stages; CONTAINS InterPro DOMAIN/s: HEAT (InterPro:IPR000357), Armadillo-like helical (InterPro:IPR011989), Splicing factor 3B subunit 1 (InterPro:IPR015016), HEAT, type 2 (InterPro:IPR021133), Armadillo-type fold (InterPro:IPR0160…	458.253	451.944	424.612	354.588	369.646	337.794	393.44	385.343	247271_at	P	P	P	P	P	P	P	P	455.098	389.6	353.72	389.392	0.856078	0.777238	0.855621	1.10085	0.999466
247280_at	At5g64260	EXORDIUM like 2 (EXL2); FUNCTIONS IN: molecular_function unknown; INVOLVED IN: biological_process unknown; LOCATED IN: cell wall, plant-type cell wall; EXPRESSED IN: 23 plant structures; EXPRESSED DURING: 13 growth stages; CONTAINS InterPro DOMAIN/s: Phosphate-induced protein 1 (InterPro:IPR006766); BEST Arabidopsis thaliana protein match is: EXORDIUM like 4 (TAIR:AT5G09440.1); Has 1807 Blast hit…	133.436	200.854	232.325	213.783	148.056	282.088	263.197	342.509	247280_at	P	P	P	P	P	P	P	P	167.145	223.054	215.072	302.853	1.3345	1.28674	1.81192	1.40815	1.35776
247283_at	At5g64250	Aldolase-type TIM barrel family protein; FUNCTIONS IN: oxidoreductase activity, catalytic activity, nitronate monooxygenase activity; INVOLVED IN: response to cadmium ion, response to symbiotic fungus, metabolic process; EXPRESSED IN: 23 plant structures; EXPRESSED DURING: 13 growth stages; CONTAINS InterPro DOMAIN/s: Aldolase-type TIM barrel (InterPro:IPR013785), 2-nitropropane dioxygenase, NPD …	315.173	284.05	268.727	205.074	150.123	276.282	257.781	261.379	247283_at	P	P	P	P	P	P	P	P	299.611	236.901	213.203	259.58	0.790693	0.711597	0.866389	1.21753	1.09573
247282_at	At5g64240	Encodes a type I metacaspases. Two Arabidopsis metacaspases, AT1G02170 (MC1) and AT4G25110 (MC2) antagonistically control programmed cell death in Arabidopsis. MC1 is a positive regulator of cell death and requires conserved caspase-like putative catalytic residues for its function. MC2 negatively regulates cell death. This function is independent of the putative catalytic residues. A third type …	102.537	108.383	134.364	118.603	91.1392	109.137	124.5	95.0095	247282_at	P	P	P	P	P	P	P	P	105.46	126.484	100.138	109.755	1.19935	0.949536	1.04072	1.09603	0.867739
247287_at	At5g64230	unknown protein; FUNCTIONS IN: molecular_function unknown; INVOLVED IN: biological_process unknown; LOCATED IN: endomembrane system; EXPRESSED IN: 9 plant structures; EXPRESSED DURING: 4 anthesis, petal differentiation and expansion stage; BEST Arabidopsis thaliana protein match is: unknown protein (TAIR:AT3G19920.1); Has 35333 Blast hits to 34131 proteins in 2444 species: Archae - 798; Bacteria …	45.5696	53.0765	36.5044	46.2057	32	48.5029	35.7532	34.5353	247287_at	P	P	P	P	P	P	P	P	49.323	41.3551	40.2515	35.1442	0.838454	0.816079	0.712532	0.873117	0.849817
247270_at	At5g64220	Calmodulin-binding transcription activator protein with CG-1 and Ankyrin domains; FUNCTIONS IN: calmodulin binding, transcription regulator activity; INVOLVED IN: regulation of transcription; LOCATED IN: nucleus; EXPRESSED IN: 23 plant structures; EXPRESSED DURING: 13 growth stages; CONTAINS InterPro DOMAIN/s: Ankyrin repeat-containing domain (InterPro:IPR020683), CG-1 (InterPro:IPR005559), IQ ca…	107.635	116.162	112.206	97.6806	134.364	112.206	109.137	119.428	247270_at	P	P	P	P	P	P	P	P	111.899	104.943	123.285	114.283	0.937841	1.10175	1.02131	0.926983	1.089
247269_at	At5g64210	encodes an isoform of alternative oxidase, which is expressed in rosettes, stems, and roots. Transcript accumulates in dry seeds and decreased upon germination and is not affected by actinomycin A. Protein is localized to mitochondria.	7.72749	6.82108	8.05564	8.11168	7.51618	8.39773	7.67411	6.9644	247269_at	A	A	A	A	A	A	A	A	7.27428	8.08366	7.95696	7.31926	1.11127	1.09385	1.00618	0.919856	0.905439
247325_at	At5g64200	encodes an SC35-like splicing factor of 35 kD localized to the nuclear specks.	92.4115	88.0347	96.3358	73.5167	43.1115	78.7932	78.7932	74.028	247325_at	P	P	P	P	P	P	P	P	90.2231	84.9262	60.9524	76.4106	0.941292	0.675574	0.846908	1.25361	0.899729
247324_at	At5g64190	unknown protein; BEST Arabidopsis thaliana protein match is: unknown protein (TAIR:AT2G40390.1); Has 1807 Blast hits to 1807 proteins in 277 species: Archae - 0; Bacteria - 0; Metazoa - 736; Fungi - 347; Plants - 385; Viruses - 0; Other Eukaryotes - 339 (source: NCBI BLink).	10.8528	11.0043	9.51366	8.81524	11.3924	8.81524	8.22491	7.72749	247324_at	A	P	P	P	P	P	P	A	10.9286	9.16445	10.1038	7.9762	0.838576	0.924532	0.729848	0.789424	0.870342
247295_at	At5g64180	unknown protein; Has 1807 Blast hits to 1807 proteins in 277 species: Archae - 0; Bacteria - 0; Metazoa - 736; Fungi - 347; Plants - 385; Viruses - 0; Other Eukaryotes - 339 (source: NCBI BLink).	141.044	125.366	128.89	139.102	173.645	131.599	125.366	131.599	247295_at	P	P	P	P	P	P	P	P	133.205	133.996	152.622	128.482	1.00594	1.14577	0.964546	0.841833	0.95885
247323_at	At5g64170	dentin sialophosphoprotein-related; FUNCTIONS IN: molecular_function unknown; INVOLVED IN: biological_process unknown; LOCATED IN: cellular_component unknown; EXPRESSED IN: 17 plant structures; EXPRESSED DURING: 9 growth stages; BEST Arabidopsis thaliana protein match is: unknown protein (TAIR:AT3G54500.2); Has 181 Blast hits to 169 proteins in 40 species: Archae - 2; Bacteria - 18; Metazoa - 17;…	315.173	418.766	249	349.706	259.574	410.148	245.572	340.144	247323_at	P	P	P	P	P	P	P	P	366.969	299.353	334.861	292.858	0.815744	0.912503	0.798044	0.874565	0.978302
247296_at	At5g64160	unknown protein; FUNCTIONS IN: molecular_function unknown; INVOLVED IN: biological_process unknown; LOCATED IN: cellular_component unknown; EXPRESSED IN: 24 plant structures; EXPRESSED DURING: 15 growth stages; Has 30201 Blast hits to 17322 proteins in 780 species: Archae - 12; Bacteria - 1396; Metazoa - 17338; Fungi - 3422; Plants - 5037; Viruses - 0; Other Eukaryotes - 2996 (source: NCBI BLink).	86.8227	81.0084	93.0542	69.551	103.968	97.6806	88.647	87.4266	247296_at	P	P	P	P	P	P	P	P	83.9155	81.3026	100.824	88.0368	0.968863	1.2015	1.04911	0.873169	1.08283
247329_at	At5g64150	RNA methyltransferase family protein; FUNCTIONS IN: protein methyltransferase activity, methyltransferase activity, catalytic activity, nucleic acid binding; INVOLVED IN: methylation, protein amino acid methylation; LOCATED IN: chloroplast; EXPRESSED IN: 18 plant structures; EXPRESSED DURING: 11 growth stages; CONTAINS InterPro DOMAIN/s: Methyltransferase small (InterPro:IPR007848), DNA methylase…	29.446	25.8125	28.0514	30.4844	31.779	23.7524	27.2843	26.7228	247329_at	P	P	P	P	P	P	P	P	27.6293	29.2679	27.7657	27.0036	1.05931	1.00494	0.977354	0.972552	0.922634
247267_at	At5g64140	Encodes a putative ribosomal protein S28.	121.095	119.428	168.897	143.013	153.277	130.69	192.672	150.123	247267_at	P	P	P	P	P	P	P	P	120.262	155.955	141.983	171.397	1.29679	1.18062	1.4252	1.20716	1.09902
247328_at	At5g64130	cAMP-regulated phosphoprotein 19-related protein; FUNCTIONS IN: molecular_function unknown; INVOLVED IN: biological_process unknown; LOCATED IN: plasma membrane; EXPRESSED IN: 24 plant structures; EXPRESSED DURING: 15 growth stages; CONTAINS InterPro DOMAIN/s: cAMP-regulated phosphoprotein/endosulphine conserved region (InterPro:IPR006760); BEST Arabidopsis thaliana protein match is: cAMP-regulat…	133.436	140.07	187.403	212.306	129.787	238.856	199.466	240.518	247328_at	P	P	P	P	P	P	P	P	136.753	199.854	184.322	219.992	1.46143	1.34785	1.60869	1.19352	1.10076
247327_at	At5g64120	encodes a cell wall bound peroxidase that is induced by hypo-osmolarity	13.5479	16.6795	15.0324	16.7955	25.1067	21.1121	20.393	51.2685	247327_at	A	A	P	P	P	P	P	P	15.1137	15.9139	23.1094	35.8307	1.05295	1.52904	2.37075	1.55048	2.25153
247326_at	At5g64110	Peroxidase superfamily protein; FUNCTIONS IN: peroxidase activity, heme binding; INVOLVED IN: response to oxidative stress, oxidation reduction; LOCATED IN: membrane; EXPRESSED IN: shoot apex, shoot, stamen, leaf; EXPRESSED DURING: 4 anthesis; CONTAINS InterPro DOMAIN/s: Haem peroxidase (InterPro:IPR010255), Plant peroxidase (InterPro:IPR000823), Peroxidases heam-ligand binding site (InterPro:IPR…	9.91766	9.44794	11.0809	10.4107	11.3924	9.71356	8.45614	8.28212	247326_at	A	A	A	A	P	P	A	A	9.6828	10.7458	10.553	8.36913	1.10978	1.08987	0.86433	0.793059	0.778828
247297_at	At5g64100	Peroxidase superfamily protein; FUNCTIONS IN: peroxidase activity, heme binding; INVOLVED IN: oxidation reduction, response to oxidative stress; LOCATED IN: cell wall; EXPRESSED IN: hypocotyl, root, callus; EXPRESSED DURING: seedling growth; CONTAINS InterPro DOMAIN/s: Haem peroxidase (InterPro:IPR010255), Plant peroxidase (InterPro:IPR000823), Peroxidases heam-ligand binding site (InterPro:IPR01…	14.5203	15.1369	16	18.2522	15.1369	13.0864	14.0257	18.0009	247297_at	A	P	P	P	A	A	A	P	14.8286	17.1261	14.1117	16.0133	1.15494	0.951652	1.07989	1.13476	0.935023
247322_at	At5g64090	FUNCTIONS IN: molecular_function unknown; INVOLVED IN: biological_process unknown; LOCATED IN: plasma membrane; EXPRESSED IN: 23 plant structures; EXPRESSED DURING: 13 growth stages; CONTAINS InterPro DOMAIN/s: Hyccin (InterPro:IPR018619); BEST Arabidopsis thaliana protein match is: unknown protein (TAIR:AT5G21050.1); Has 1807 Blast hits to 1807 proteins in 277 species: Archae - 0; Bacteria - 0; …	120.259	120.259	103.968	93.7015	83.2859	101.829	112.986	111.43	247322_at	P	P	P	P	P	P	P	P	120.259	98.8349	92.5573	112.208	0.821851	0.76965	0.933055	1.21231	1.13531
247268_at	At5g64080	Bifunctional inhibitor/lipid-transfer protein/seed storage 2S albumin superfamily protein; FUNCTIONS IN: lipid binding; INVOLVED IN: lipid transport; LOCATED IN: anchored to plasma membrane, anchored to membrane; EXPRESSED IN: 25 plant structures; EXPRESSED DURING: 14 growth stages; CONTAINS InterPro DOMAIN/s: Bifunctional inhibitor/plant lipid transfer protein/seed storage (InterPro:IPR016140), …	26.9087	24.0839	24.4201	22.6274	35.261	24.59	30.91	33.3589	247268_at	P	P	P	P	P	P	P	P	25.4963	23.5238	29.9255	32.1344	0.922635	1.17372	1.26036	1.07382	1.36604
247321_s_at	At5g64070	Encodes a phosphatidylinositol 4-OH kinase, PI-4Kbeta1. Arabidopsis contains 12 PI-4Ks in three separate families: PI-4Kalphs, PI-4kbeta, and PI-4Kgamma. PI-4Kbeta1 is 83% identical to PI-4kbeta2 encoded by At5g09350. Interacts with the RabA4b GTPase. Important for polarized root hair growth as the loss of this gene and its close relative PI-4kbeta2, leads to the formation of abnormal root hairs.	72.0037	78.7932	76.6386	64.8934	50.2134	61.3929	78.7932	81.0084	247321_s_at	P	P	P	P	P	P	P	P	75.3985	70.766	55.8031	79.9008	0.93856	0.74011	1.05971	1.43183	1.12908
247317_at	At5g64060	NAC domain containing protein 103 (NAC103); FUNCTIONS IN: sequence-specific DNA binding transcription factor activity; INVOLVED IN: multicellular organismal development, regulation of transcription; LOCATED IN: cellular_component unknown; EXPRESSED IN: 9 plant structures; EXPRESSED DURING: 6 growth stages; CONTAINS InterPro DOMAIN/s: No apical meristem (NAM) protein (InterPro:IPR003441); BEST Ara…	12.1257	11.4716	11.2356	11.0043	13.0864	14.6213	10.1965	9.57983	247317_at	A	A	A	A	A	A	A	A	11.7987	11.1199	13.8539	9.88816	0.942473	1.17419	0.838073	0.713747	0.889227
247319_at	At5g64050	Glutamate-tRNA ligase. Targeted to mitochondria and chloroplast. Its inactivation causes developmental arrest of chloroplasts and mitochondria in Nicotiana benthamiana.	82.1393	61.8199	67.6492	77.7085	66.257	61.8199	66.257	65.7993	247319_at	P	P	P	P	P	P	P	P	71.9796	72.6788	64.0384	66.0281	1.00971	0.889675	0.917317	1.03107	0.908492
247320_at	At5g64040	Encodes the only subunit of photosystem I located entirely in the thylakoid lumen. May be involved in the interaction between plastocyanin and the photosystem I complex.	1595.73	1734.13	1152.06	1782.89	1398.83	1675.06	1351.18	1606.83	247320_at	P	P	P	P	P	P	P	P	1664.93	1467.47	1536.94	1479	0.881402	0.923128	0.888326	0.9623	1.00786
247316_at	At5g64030	S-adenosyl-L-methionine-dependent methyltransferases superfamily protein; CONTAINS InterPro DOMAIN/s: Protein of unknown function DUF248, methyltransferase putative (InterPro:IPR004159); BEST Arabidopsis thaliana protein match is: S-adenosyl-L-methionine-dependent methyltransferases superfamily protein (TAIR:AT1G29470.2); Has 79879 Blast hits to 39720 proteins in 2025 species: Archae - 377; Bacte…	131.599	150.123	99.0442	111.43	181.019	128	141.044	159.786	247316_at	P	P	P	P	P	P	P	P	140.861	105.237	154.51	150.415	0.747102	1.0969	1.06783	0.973499	1.42929
247315_at	At5g64010	unknown protein; FUNCTIONS IN: molecular_function unknown; INVOLVED IN: biological_process unknown; LOCATED IN: cellular_component unknown; EXPRESSED IN: 23 plant structures; EXPRESSED DURING: 13 growth stages; Has 34 Blast hits to 34 proteins in 12 species: Archae - 0; Bacteria - 0; Metazoa - 0; Fungi - 0; Plants - 34; Viruses - 0; Other Eukaryotes - 0 (source: NCBI BLink).	27.0958	26.5382	28.84	32.2226	30.0647	25.9921	29.8571	23.4254	247315_at	P	P	P	P	P	P	P	P	26.817	30.5313	28.0284	26.6412	1.1385	1.04517	0.993444	0.950508	0.872587
247314_at	At5g64000	3'(2'),5'-bisphosphate nucleotidase	13.1775	13.0864	15.5625	14.6213	12.1257	11.8762	12.9063	12.5533	247314_at	P	P	P	P	A	A	P	P	13.1319	15.0919	12.001	12.7298	1.14925	0.913875	0.969377	1.06073	0.843487
247318_at	At5g63990	Inositol monophosphatase family protein; FUNCTIONS IN: 3'(2'),5'-bisphosphate nucleotidase activity, inositol or phosphatidylinositol phosphatase activity; INVOLVED IN: sulfur metabolic process; LOCATED IN: cellular_component unknown; EXPRESSED IN: 17 plant structures; EXPRESSED DURING: 6 growth stages; CONTAINS InterPro DOMAIN/s: Inositol monophosphatase (InterPro:IPR000760), 3(2),5 -bisphosphat…	82.7106	76.6386	62.2499	83.8652	76.1093	76.6386	75.0614	93.0542	247318_at	P	P	P	P	P	P	P	P	79.6746	73.0575	76.3739	84.0578	0.916949	0.958573	1.05501	1.10061	1.15057
247313_at	At5g63980	Encodes a bifunctional protein that has 3'(2'),5'-bisphosphate nucleotidase and inositol polyphosphate 1-phosphatase activities and rescues sulfur assimilation mutants in yeast. It is involved in the response to cold, drought (negative regulator of drought tolerance), and ABA. Mutants in this gene exhibit enhanced induction of stress genes in response to cold, ABA, salt and dehydration due to hig…	168.897	199.466	216.767	268.727	199.466	227.544	205.074	192.672	247313_at	P	P	P	P	P	P	P	P	184.182	242.747	213.505	198.873	1.31798	1.15921	1.07976	0.931467	0.819259
247312_at	At5g63970	Copine (Calcium-dependent phospholipid-binding protein) family; FUNCTIONS IN: zinc ion binding; INVOLVED IN: biological_process unknown; LOCATED IN: cellular_component unknown; EXPRESSED IN: 17 plant structures; EXPRESSED DURING: 7 growth stages; CONTAINS InterPro DOMAIN/s: Zinc finger, RING-type (InterPro:IPR001841), Copine (InterPro:IPR010734), von Willebrand factor, type A (InterPro:IPR002035)…	51.2685	82.1393	81.0084	80.4489	95.0095	79.3413	62.2499	52.3457	247312_at	P	P	P	P	P	P	P	P	66.7039	80.7286	87.1754	57.2978	1.21025	1.3069	0.858988	0.657271	0.709758
247311_at	At5g63960	FUNCTIONS IN: DNA-directed DNA polymerase activity, DNA binding, nucleotide binding, nucleic acid binding; INVOLVED IN: DNA replication, nucleobase, nucleoside, nucleotide and nucleic acid metabolic process; CONTAINS InterPro DOMAIN/s: DNA polymerase, family B (InterPro:IPR022762), DNA-directed DNA polymerase, family B, exonuclease domain (InterPro:IPR006133), DNA-directed DNA polymerase, family …	19.0273	19.6983	16	19.0273	23.2636	17.5087	18.507	15.0324	247311_at	P	P	P	P	P	P	P	P	19.3628	17.5137	20.3861	16.7697	0.9045	1.05285	0.866077	0.822603	0.957521
247310_at	At5g63950	chromatin remodeling 24 (CHR24); FUNCTIONS IN: helicase activity, DNA binding, nucleic acid binding, ATP binding; INVOLVED IN: response to cadmium ion; EXPRESSED IN: 22 plant structures; EXPRESSED DURING: 7 growth stages; CONTAINS InterPro DOMAIN/s: DEAD-like helicase, N-terminal (InterPro:IPR014001), DNA/RNA helicase, C-terminal (InterPro:IPR001650), Helicase, superfamily 1/2, ATP-binding domain…	14.3204	15.1369	13.2691	12.5533	13.9288	12.2101	11.6318	13.0864	247310_at	P	P	P	P	P	P	P	P	14.7287	12.9112	13.0694	12.3591	0.876606	0.887348	0.839119	0.945649	0.957237
247309_at	At5g63940	Protein kinase protein with adenine nucleotide alpha hydrolases-like domain; FUNCTIONS IN: protein serine/threonine kinase activity, protein kinase activity, kinase activity, ATP binding; INVOLVED IN: protein amino acid phosphorylation, response to stress; LOCATED IN: cellular_component unknown; EXPRESSED IN: 24 plant structures; EXPRESSED DURING: 14 growth stages; CONTAINS InterPro DOMAIN/s: Usp…	100.427	94.3532	89.8845	86.2229	64.8934	64.4452	79.8932	79.3413	247309_at	P	P	P	P	P	P	P	P	97.39	88.0537	64.6693	79.6172	0.904135	0.664024	0.817509	1.23114	0.904189
247308_at	At5g63930	Leucine-rich repeat protein kinase family protein; FUNCTIONS IN: protein serine/threonine kinase activity, protein kinase activity, ATP binding; INVOLVED IN: transmembrane receptor protein tyrosine kinase signaling pathway, protein amino acid phosphorylation; LOCATED IN: plasma membrane; EXPRESSED IN: 18 plant structures; EXPRESSED DURING: 8 growth stages; CONTAINS InterPro DOMAIN/s: Protein kina…	32.2226	35.0174	29.8571	28.84	29.8571	28.0514	26.5382	23.9176	247308_at	P	P	P	P	P	P	P	P	33.62	29.3485	28.9542	25.2279	0.872949	0.86122	0.750384	0.871303	0.859597
247301_at	At5g63920	Encodes topoisomerase 3alpha. Suppresses somatic crossovers. Essential for resolution of meiotic recombination intermediates.	9.25351	8.51496	8.63383	8.11168	8.39773	8.63383	7.46426	9.98664	247301_at	A	A	A	A	A	A	P	A	8.88423	8.37275	8.51578	8.72545	0.942428	0.958527	0.982128	1.02462	1.04213
247300_at	At5g63910	Encodes a farnesylcysteine lyase (EC 1.8.3.5) involved in a salvage /detoxification pathway of farnesylcysteine (FC) residues that are liberated during the degradation of prenylated proteins. Because FC is a competitive inhibitor of prenylcysteine methyltransferases involved in the down-regulation of ABA signaling, fcly mutants with elevated FC levels are hypersensitive to ABA. The protein also a…	97.6806	103.25	99.0442	106.153	143.013	106.891	111.43	109.137	247300_at	P	P	P	P	P	P	P	P	100.465	102.599	124.952	110.284	1.02123	1.24373	1.09773	0.88261	1.07491
247305_at	At5g63905	unknown protein; FUNCTIONS IN: molecular_function unknown; INVOLVED IN: N-terminal protein myristoylation; LOCATED IN: cellular_component unknown; EXPRESSED IN: 20 plant structures; EXPRESSED DURING: 12 growth stages; Has 30201 Blast hits to 17322 proteins in 780 species: Archae - 12; Bacteria - 1396; Metazoa - 17338; Fungi - 3422; Plants - 5037; Viruses - 0; Other Eukaryotes - 2996 (source: NCBI…	47.5048	46.8507	39.1245	44.6318	54.9482	48.8403	51.6251	45.8866	247305_at	P	P	P	P	P	P	P	P	47.1777	41.8781	51.8942	48.7558	0.887667	1.09997	1.03345	0.939523	1.16423
247299_at	At5g63900	Acyl-CoA N-acyltransferase with RING/FYVE/PHD-type zinc finger domain; FUNCTIONS IN: DNA binding, zinc ion binding, N-acetyltransferase activity; INVOLVED IN: regulation of transcription, DNA-dependent, metabolic process; LOCATED IN: nucleus; EXPRESSED IN: leaf lamina base, leaf whorl, flower, leaf, seed; EXPRESSED DURING: LP.04 four leaves visible, petal differentiation and expansion stage, E ex…	9.57983	11.0809	11.0043	10.7034	10.1261	12.6407	10.5561	8.9383	247299_at	A	A	P	A	A	P	P	A	10.3304	10.8539	11.3834	9.74718	1.05068	1.10193	0.943548	0.856266	0.898037
247303_at	At5g63890	Encodes histidinol dehydrogenase. Up-regulated in response to UV-B.	115.36	106.891	121.095	128.89	158.683	118.603	141.044	110.661	247303_at	P	P	P	P	P	P	P	P	111.126	124.993	138.643	125.852	1.12479	1.24762	1.13252	0.907744	1.00688
247302_at	At5g63880	VPS20.1; CONTAINS InterPro DOMAIN/s: Snf7 (InterPro:IPR005024); BEST Arabidopsis thaliana protein match is: vacuolar protein sorting-associated protein 20.2 (TAIR:AT5G09260.1).	136.239	126.238	121.938	148.056	230.72	130.69	141.044	151.167	247302_at	P	P	P	P	P	P	P	P	131.239	134.997	180.705	146.105	1.02864	1.37692	1.11328	0.808531	1.08229
247306_at	At5g63870	Encodes a nuclear localized serine/threonine phosphatase that appears to be regulated by redox activity and is a positive regulator of cryptochrome mediated blue light signalling.	99.0442	95.6704	89.2636	85.0359	70.0348	89.2636	99.7331	89.8845	247306_at	P	P	P	P	P	P	P	P	97.3573	87.1497	79.6492	94.8088	0.895154	0.818113	0.973823	1.19033	1.08788
247307_at	At5g63860	UV-B-specific signaling component that orchestrates expression of a range of genes with vital UV-protective functions. Located in the nucleus and the cytosol. Associates with chromatin via histones. UV-B light promotes URV8 protein accumulation in the nucleus.	451.944	448.822	481.036	474.413	333.144	433.534	448.822	427.565	247307_at	P	P	P	P	P	P	P	P	450.383	477.724	383.339	438.194	1.06071	0.851139	0.972935	1.1431	0.917252
247304_at	At5g63850	Amino acid transporter whose expression is downregulated by dehydration.	421.679	501.463	436.549	458.253	337.794	455.087	451.944	451.944	247304_at	P	P	P	P	P	P	P	P	461.571	447.401	396.441	451.944	0.969301	0.858895	0.979143	1.14	1.01015
247298_at	At5g63840	radial swelling mutant shown to be specifically impaired in cellulose production. Encodes the alpha-subunit of a glucosidase II enzyme.	195.361	200.854	187.403	190.019	233.941	167.73	213.783	187.403	247298_at	P	P	P	P	P	P	P	P	198.107	188.711	200.836	200.593	0.952569	1.01377	1.01255	0.998791	1.06296
247350_at	At5g63830	HIT-type Zinc finger family protein; FUNCTIONS IN: molecular_function unknown; INVOLVED IN: biological_process unknown; LOCATED IN: chloroplast; EXPRESSED IN: 20 plant structures; EXPRESSED DURING: 7 growth stages; CONTAINS InterPro DOMAIN/s: Zinc finger, HIT-type (InterPro:IPR007529); Has 30201 Blast hits to 17322 proteins in 780 species: Archae - 12; Bacteria - 1396; Metazoa - 17338; Fungi - 34…	29.8571	27.6652	30.0647	34.0598	26.5382	25.4572	27.0958	24.59	247350_at	P	P	P	P	P	P	P	P	28.7611	32.0623	25.9977	25.8429	1.11478	0.903918	0.898537	0.994047	0.806023
247349_at	At5g63820	Protein of unknown function (DUF626); CONTAINS InterPro DOMAIN/s: Protein of unknown function DUF626, Arabidopsis thaliana (InterPro:IPR006462); BEST Arabidopsis thaliana protein match is: Protein of unknown function (DUF626) (TAIR:AT4G28920.1); Has 1807 Blast hits to 1807 proteins in 277 species: Archae - 0; Bacteria - 0; Metazoa - 736; Fungi - 347; Plants - 385; Viruses - 0; Other Eukaryotes - …	13.4543	15.1369	14.8254	18.1261	13.0864	15.455	14.8254	12.7286	247349_at	A	A	A	A	A	A	A	A	14.2956	16.4758	14.2707	13.777	1.1525	0.998256	0.963721	0.965404	0.836197
247348_at	At5g63810	member of Glycoside Hydrolase Family 35	12.996	12.3805	14.42	13.4543	15.5625	12.9063	18.7654	11.7942	247348_at	A	A	P	A	A	A	P	A	12.6883	13.9372	14.2344	15.2798	1.09843	1.12185	1.20424	1.07344	1.09633
247356_at	At5g63800	Involved in mucilage formation. Mutants form columella and outer cell wall architecture of the mucilage cells resembles wild-type. However, mum2 seeds completely lack seed coat mucilage. This mutation appears to represent a later step in the development of this cell-type. Encodes a beta-galactosidase involved in seed coat mucilage biosynthesis. Member of Glycoside Hydrolase Family 35	333.144	415.873	265.028	292.036	187.403	427.565	374.806	433.534	247356_at	P	P	P	P	P	P	P	P	374.508	278.532	307.484	404.17	0.743726	0.821034	1.0792	1.31444	1.45107
247351_at	At5g63790	Encodes a member of the NAC family of transcription factors. ANAC102 appears to have a role in mediating response to low oxygen stress (hypoxia) in germinating seedlings.	382.681	292.036	451.944	364.557	592.224	487.751	560.278	530.056	247351_at	P	P	P	P	P	P	P	P	337.358	408.25	539.988	545.167	1.21014	1.60063	1.61599	1.00959	1.33537
247347_at	At5g63780	Encodes SHA1 (shoot apical meristem arrest), a putative E3 ligase (a RING finger protein) required for post-embryonic SAM maintenance. The mutant sha1-1 shows a primary SAM-deficient phenotype at the adult stage.	238.856	247.28	140.07	202.251	385.343	202.251	206.5	194.012	247347_at	P	P	P	P	P	P	P	P	243.068	171.16	293.797	200.256	0.704165	1.2087	0.823868	0.681614	1.16999
247346_at	At5g63770	a member of the diacylglycerol kinase gene family. Encodes a functional diacylglycerol kinase. Involved in root elongation and plant development. Gene expression is induced by wounding or cold.	45.5696	53.4456	51.6251	67.1819	67.1819	67.6492	65.7993	92.4115	247346_at	P	P	P	P	P	P	P	P	49.5076	59.4035	67.4155	79.1054	1.19989	1.36172	1.59784	1.1734	1.33166
247345_at	At5g63760	ARIADNE 15 (ARI15); FUNCTIONS IN: zinc ion binding; LOCATED IN: intracellular; EXPRESSED IN: 22 plant structures; EXPRESSED DURING: 12 growth stages; CONTAINS InterPro DOMAIN/s: Zinc finger, C6HC-type (InterPro:IPR002867), Zinc finger, RING-type (InterPro:IPR001841), Zinc finger, RanBP2-type (InterPro:IPR001876); BEST Arabidopsis thaliana protein match is: RING/U-box superfamily protein (TAIR:AT5…	117.784	100.427	120.259	122.786	114.563	114.563	123.64	93.0542	247345_at	P	P	P	P	P	P	P	P	109.105	121.522	114.563	108.347	1.11381	1.05002	0.993049	0.94574	0.891581
247344_at	At5g63750	ARIADNE 13 (ARI13); FUNCTIONS IN: zinc ion binding; LOCATED IN: intracellular; EXPRESSED IN: 6 plant structures; EXPRESSED DURING: 4 anthesis, petal differentiation and expansion stage; CONTAINS InterPro DOMAIN/s: Zinc finger, C6HC-type (InterPro:IPR002867), Zinc finger, RING-type (InterPro:IPR001841), Zinc finger, RanBP2-type (InterPro:IPR001876); BEST Arabidopsis thaliana protein match is: IBR …	10.7034	9.91766	12.4666	10.6295	11.1579	11.2356	11.0043	10.4107	247344_at	P	A	P	P	P	P	P	A	10.3105	11.5481	11.1968	10.7075	1.12002	1.08595	1.0385	0.956307	0.927215
247343_at	At5g63740	A paternally expressed imprinted gene.	5.9794	6.45313	6.27667	6.36429	5.85634	6.23332	6.1475	6.02099	247343_at	A	A	A	A	A	A	A	A	6.21627	6.32048	6.04483	6.08424	1.01677	0.972421	0.978762	1.00652	0.962623
247342_at	At5g63730	Encodes ARIADNE14 (ARI14), a putative ubiquitin E3 ligase. ARI14 and an inversely transcribed gene KPL generate a sperm-specific natural cis-antisense siRNA pair. In the absence of KPL, ARI14 RNA levels in sperm are increased and fertilization is impaired.	12.1257	11.0043	11.3924	10.6295	11.4716	12.1257	10.9283	12.6407	247342_at	A	A	A	A	A	A	A	A	11.565	11.0109	11.7987	11.7845	0.952089	1.0202	1.01898	0.998797	1.07025
247341_at	At5g63720	Encodes KOKOPELLI (KPL). kokopelli (kpl) mutants display frequent single-fertilization events indicating that KPL is involved in double fertilization. KPL and an inversely transcribed gene, ARIADNE14 (ARI14), which encodes a putative ubiquitin E3 ligase, generate a sperm-specific natural cis-antisense siRNA pair. In the absence of KPL, ARI14 RNA levels in sperm are increased and fertilization is …	7.1602	6.58873	6.9644	7.6211	6.54322	7.21	7.83536	6.54322	247341_at	A	A	A	P	A	A	P	A	6.87446	7.29275	6.87661	7.18929	1.06085	1.00031	1.0458	1.04547	0.985813
247357_at	At5g63710	Leucine-rich repeat protein kinase family protein; FUNCTIONS IN: protein serine/threonine kinase activity, protein kinase activity, ATP binding; INVOLVED IN: transmembrane receptor protein tyrosine kinase signaling pathway, protein amino acid phosphorylation; LOCATED IN: cellular_component unknown; EXPRESSED IN: 22 plant structures; EXPRESSED DURING: 13 growth stages; CONTAINS InterPro DOMAIN/s: …	250.732	233.941	286.026	250.732	290.018	191.341	250.732	186.108	247357_at	P	P	P	P	P	P	P	P	242.336	268.379	240.679	218.42	1.10746	0.993163	0.90131	0.907514	0.813851
247340_at	At5g63700	zinc ion binding;DNA binding; FUNCTIONS IN: DNA binding, zinc ion binding; INVOLVED IN: histone modification, transcription initiation; LOCATED IN: nucleus; EXPRESSED IN: 18 plant structures; EXPRESSED DURING: 13 growth stages; CONTAINS InterPro DOMAIN/s: Zinc finger, RING-type, conserved site (InterPro:IPR017907), Plus-3 domain, subgroup (InterPro:IPR018144), SWIB/MDM2 domain (InterPro:IPR003121…	22.4711	28.6408	31.3414	32.6724	24.761	25.6342	26.5382	28.443	247340_at	P	P	P	P	P	P	P	M	25.556	32.0069	25.1976	27.4906	1.25242	0.985979	1.0757	1.091	0.858895
247339_at	At5g63690	Nucleic acid-binding, OB-fold-like protein; CONTAINS InterPro DOMAIN/s: Nucleic acid-binding, OB-fold-like (InterPro:IPR016027), Nucleic acid-binding, OB-fold (InterPro:IPR012340); Has 222 Blast hits to 217 proteins in 77 species: Archae - 8; Bacteria - 0; Metazoa - 154; Fungi - 0; Plants - 44; Viruses - 0; Other Eukaryotes - 16 (source: NCBI BLink).	12.295	11.1579	13.2691	12.5533	13.1775	12.9063	12.8171	12.4666	247339_at	A	A	A	A	A	P	P	A	11.7265	12.9112	13.0419	12.6419	1.10103	1.11217	1.07806	0.969331	0.979138
247338_at	At5g63680	Pyruvate kinase family protein; FUNCTIONS IN: pyruvate kinase activity, potassium ion binding, magnesium ion binding, catalytic activity; INVOLVED IN: response to cadmium ion, glycolysis; LOCATED IN: plasma membrane; EXPRESSED IN: 23 plant structures; EXPRESSED DURING: 13 growth stages; CONTAINS InterPro DOMAIN/s: Pyruvate kinase, C-terminal-like (InterPro:IPR015795), Pyruvate kinase, active site…	113.772	110.661	123.64	133.436	132.514	102.537	125.366	116.97	247338_at	P	P	P	P	P	P	P	P	112.216	128.538	117.525	121.168	1.14545	1.04731	1.07977	1.03099	0.942666
247355_at	At5g63670	SPT4 homolog 2 (SPT42); FUNCTIONS IN: positive transcription elongation factor activity, zinc ion binding; INVOLVED IN: positive regulation of transcription, N-terminal protein myristoylation; LOCATED IN: nucleus; EXPRESSED IN: 22 plant structures; EXPRESSED DURING: 13 growth stages; CONTAINS InterPro DOMAIN/s: Transcription initiation Spt4 (InterPro:IPR009287), Transcription initiation Spt4-like…	369.646	354.588	369.646	374.806	268.727	369.646	377.413	340.144	247355_at	P	P	P	P	P	P	P	P	362.117	372.226	319.187	358.778	1.02792	0.881446	0.99078	1.12404	0.963872
247337_at	At5g63660	Predicted to encode a PR (pathogenesis-related) protein. Belongs to the plant defensin (PDF) family with the following members: At1g75830/PDF1.1, At5g44420/PDF1.2a, At2g26020/PDF1.2b, At5g44430/PDF1.2c, At2g26010/PDF1.3, At1g19610/PDF1.4, At1g55010/PDF1.5, At2g02120/PDF2.1, At2g02100/PDF2.2, At2g02130/PDF2.3, At1g61070/PDF2.4, At5g63660/PDF2.5, At2g02140/PDF2.6, At5g38330/PDF3.1 and At4g30070/PDF…	9.98664	9.00047	8.57419	9.64646	8.57419	7.6211	9.38268	9.18959	247337_at	A	A	A	A	A	A	A	A	9.49356	9.11033	8.09765	9.28613	0.959633	0.852962	0.978151	1.14677	1.0193
247352_at	At5g63650	encodes a member of SNF1-related protein kinases (SnRK2) whose activity is activated by ionic (salt) and non-ionic (mannitol) osmotic stress.	10.9283	10.4831	12.6407	10.2674	11.7127	11.6318	12.7286	11.8762	247352_at	A	A	P	A	P	A	P	A	10.7057	11.454	11.6722	12.3024	1.0699	1.09028	1.14914	1.05399	1.07407
247336_at	At5g63640	ENTH/VHS/GAT family protein; FUNCTIONS IN: protein transporter activity; INVOLVED IN: intracellular protein transport, intra-Golgi vesicle-mediated transport; LOCATED IN: Golgi stack, plasma membrane; EXPRESSED IN: 23 plant structures; EXPRESSED DURING: 13 growth stages; CONTAINS InterPro DOMAIN/s: VHS (InterPro:IPR002014), GAT (InterPro:IPR004152), ENTH/VHS (InterPro:IPR008942); BEST Arabidopsis…	142.025	139.102	143.013	117.784	154.343	142.025	133.436	128	247336_at	P	P	P	P	P	P	P	P	140.563	130.398	148.184	130.718	0.927683	1.05422	0.929956	0.882131	1.00245
247335_at	At5g63630	P-loop containing nucleoside triphosphate hydrolases superfamily protein; FUNCTIONS IN: helicase activity, ATP binding, ATP-dependent helicase activity, nucleic acid binding; INVOLVED IN: biological_process unknown; LOCATED IN: endomembrane system; EXPRESSED IN: 15 plant structures; EXPRESSED DURING: 10 growth stages; CONTAINS InterPro DOMAIN/s: RNA helicase, DEAD-box type, Q motif (InterPro:IPR0…	24.2515	22.0087	22.4711	22.6274	19.5622	22.3159	20.9663	20.9663	247335_at	P	P	P	P	P	P	P	P	23.1301	22.5493	20.9391	20.9663	0.97489	0.905275	0.906452	1.0013	0.929799
247353_at	At5g63620	GroES-like zinc-binding alcohol dehydrogenase family protein; FUNCTIONS IN: cobalt ion binding, zinc ion binding; INVOLVED IN: oxidation reduction; EXPRESSED IN: 24 plant structures; EXPRESSED DURING: 13 growth stages; CONTAINS InterPro DOMAIN/s: GroES-like (InterPro:IPR011032), Alcohol dehydrogenase GroES-like (InterPro:IPR013154), Alcohol dehydrogenase, C-terminal (InterPro:IPR013149), Alcohol …	235.568	232.325	225.972	224.411	170.072	192.672	213.783	218.275	247353_at	P	P	P	P	P	P	P	P	233.946	225.192	181.372	216.029	0.962577	0.77527	0.92341	1.19108	0.95931
247334_at	At5g63610	significant sequence similarity to plant and animal cyclin-dependent protein kinases, and was classified as an E-type CDK with a SPTAIRE cyclin binding motif in the kinase domain.	105.42	102.537	87.4266	69.551	82.7106	83.8652	89.8845	88.647	247334_at	P	P	P	P	P	P	P	P	103.978	78.4888	83.2879	89.2657	0.754858	0.801012	0.858504	1.07177	1.13731
247333_at	At5g63600	encodes a protein whose sequence is similar to flavonol synthase	7.6211	8.1681	7.67411	7.94474	6.86852	7.72749	7.01285	7.26015	247333_at	A	A	A	A	A	A	A	A	7.8946	7.80943	7.29801	7.1365	0.989211	0.92443	0.903972	0.97787	0.913831
247354_at	At5g63590	flavonol synthase 3 (FLS3); CONTAINS InterPro DOMAIN/s: Oxoglutarate/iron-dependent oxygenase (InterPro:IPR005123); BEST Arabidopsis thaliana protein match is: flavonol synthase 1 (TAIR:AT5G08640.2); Has 8006 Blast hits to 7970 proteins in 965 species: Archae - 0; Bacteria - 1024; Metazoa - 86; Fungi - 741; Plants - 4902; Viruses - 0; Other Eukaryotes - 1253 (source: NCBI BLink).	16.6795	16.1113	15.3482	16.2234	15.6707	14.3204	13.6422	14.1232	247354_at	P	A	A	A	A	A	A	A	16.3954	15.7858	14.9956	13.8827	0.96282	0.914622	0.846745	0.925787	0.879443
247358_at	At5g63580	encodes a protein whose sequence is similar to flavonol synthase	458.253	484.382	326.288	362.039	280.139	367.093	357.054	302.334	247358_at	P	P	P	P	P	P	P	P	471.317	344.163	323.616	329.694	0.730215	0.68662	0.699517	1.01878	0.957959
247392_at	At5g63570	Encodes a protein with homology to glutamate-1-semialdehyde 2,1-aminomutase catalyzing the conversion of glutamate-1-semialdehyde (GSA) into 5-amino levulinate. The expression of this gene was demonstrated to be light-induced.	164.279	139.102	184.823	155.417	243.875	137.187	209.383	168.897	247392_at	P	P	P	P	P	P	P	P	151.69	170.12	190.531	189.14	1.1215	1.25605	1.24688	0.992698	1.1118
247359_at	At5g63560	HXXXD-type acyl-transferase family protein; FUNCTIONS IN: transferase activity, transferring acyl groups other than amino-acyl groups, transferase activity; INVOLVED IN: biological_process unknown; LOCATED IN: cellular_component unknown; EXPRESSED IN: 8 plant structures; EXPRESSED DURING: LP.04 four leaves visible, F mature embryo stage, 4 leaf senescence stage, petal differentiation and expansio…	22.0087	20.8215	26.5382	25.9921	40.7859	24.59	25.8125	24.9333	247359_at	P	P	P	P	M	P	P	A	21.4151	26.2652	32.688	25.3729	1.22648	1.5264	1.18482	0.776215	0.966029
247391_at	At5g63540	Encodes RMI1. Suppresses somatic crossovers. Essential for resolution of meiotic recombination intermediates.	5.9794	5.93809	5.38893	5.89708	5.85634	6.19026	5.09824	5.65685	247391_at	A	A	A	A	A	A	A	P	5.95875	5.64301	6.0233	5.37755	0.947012	1.01083	0.902463	0.892791	0.952958
247331_at	At5g63530	Farnesylated protein that binds metals.	286.026	288.015	192.672	242.191	294.067	254.232	222.861	276.282	247331_at	P	P	P	P	P	P	P	P	287.02	217.431	274.149	249.572	0.757546	0.955156	0.869526	0.91035	1.14782
247390_at	At5g63520	CONTAINS InterPro DOMAIN/s: F-box domain, Skp2-like (InterPro:IPR022364), FIST C domain (InterPro:IPR019494), FIST domain, N-terminal (InterPro:IPR013702); Has 137 Blast hits to 137 proteins in 56 species: Archae - 0; Bacteria - 88; Metazoa - 6; Fungi - 0; Plants - 32; Viruses - 0; Other Eukaryotes - 11 (source: NCBI BLink).	57.2816	56.493	51.9842	47.5048	75.0614	44.6318	46.5271	51.2685	247390_at	P	P	P	P	P	P	P	P	56.8873	49.7445	59.8466	48.8978	0.874439	1.05202	0.859556	0.817052	0.98298
247330_at	At5g63510	Encodes a mitochondrial gamma carbonic anhydrase-like protein. Component of the NADH dehydrogenase complex.	196.72	183.546	209.383	206.5	174.853	205.074	224.411	206.5	247330_at	P	P	P	P	P	P	P	P	190.133	207.942	189.964	215.456	1.09366	0.999108	1.13318	1.1342	1.03614
247389_at	At5g63490	CBS / octicosapeptide/Phox/Bemp1 (PB1) domains-containing protein; EXPRESSED IN: 24 plant structures; EXPRESSED DURING: 15 growth stages; CONTAINS InterPro DOMAIN/s: Octicosapeptide/Phox/Bem1p (InterPro:IPR000270), Cystathionine beta-synthase, core (InterPro:IPR000644); BEST Arabidopsis thaliana protein match is: CBS / octicosapeptide/Phox/Bemp1 (PB1) domains-containing protein (TAIR:AT5G50530.1)…	256	259.574	278.204	249	261.379	256	272.479	265.028	247389_at	P	P	P	P	P	P	P	P	257.787	263.602	258.69	268.753	1.02256	1.0035	1.04254	1.0389	1.01954
247361_at	At5g63480	unknown protein; Has 30201 Blast hits to 17322 proteins in 780 species: Archae - 12; Bacteria - 1396; Metazoa - 17338; Fungi - 3422; Plants - 5037; Viruses - 0; Other Eukaryotes - 2996 (source: NCBI BLink).	24.0839	25.6342	31.779	38.0546	30.6965	31.125	28.443	19.8353	247361_at	P	A	P	P	A	A	P	A	24.8591	34.9168	30.9107	24.1391	1.40459	1.24344	0.971039	0.780932	0.691333
247388_s_at	At5g63470	nuclear factor Y, subunit C4 (NF-YC4); CONTAINS InterPro DOMAIN/s: Transcription factor CBF/NF-Y/archaeal histone (InterPro:IPR003958), Histone-fold (InterPro:IPR009072); BEST Arabidopsis thaliana protein match is: nuclear factor Y, subunit C1 (TAIR:AT3G48590.1); Has 1376 Blast hits to 1376 proteins in 227 species: Archae - 0; Bacteria - 0; Metazoa - 467; Fungi - 353; Plants - 441; Viruses - 0; O…	9.98664	9.98664	9.38268	7.94474	6.54322	10.6295	11.7942	9.38268	247388_s_at	P	P	P	P	P	P	P	A	9.98664	8.66371	8.58635	10.5884	0.86753	0.859783	1.06026	1.23317	1.22216
247387_at	At5g63460	SAP domain-containing protein; FUNCTIONS IN: DNA binding, nucleic acid binding; INVOLVED IN: biological_process unknown; LOCATED IN: nucleus, chloroplast; EXPRESSED IN: male gametophyte, pollen tube; EXPRESSED DURING: L mature pollen stage; CONTAINS InterPro DOMAIN/s: DNA-binding SAP (InterPro:IPR003034), Ubiquitin ligase, Det1/DDB1-complexing (InterPro:IPR018276).	28.6408	28.443	27.2843	25.2813	30.91	34.0598	28.6408	23.5883	247387_at	P	P	A	A	P	A	P	A	28.5419	26.2828	32.4849	26.1146	0.920851	1.13815	0.914956	0.803898	0.993598
247360_at	At5g63450	member of CYP94B	13.1775	20.1122	11.5514	23.5883	13.1775	40.7859	13.3614	24.761	247360_at	P	P	A	M	A	P	P	P	16.6448	17.5699	26.9817	19.0612	1.05557	1.62103	1.14517	0.70645	1.08488
247332_at	At5g63440	Protein of unknown function (DUF167); CONTAINS InterPro DOMAIN/s: Protein of unknown function DUF167 (InterPro:IPR003746); BEST Arabidopsis thaliana protein match is: Protein of unknown function (DUF167) (TAIR:AT1G49170.1); Has 813 Blast hits to 813 proteins in 317 species: Archae - 13; Bacteria - 428; Metazoa - 238; Fungi - 12; Plants - 68; Viruses - 0; Other Eukaryotes - 54 (source: NCBI BLink).	44.9422	40.7859	37.7918	36.0019	29.446	32	41.3553	32.8996	247332_at	P	P	P	P	P	P	P	P	42.8641	36.8968	30.723	37.1275	0.860786	0.716754	0.866167	1.20846	1.00625
247386_at	At5g63430	putative protein similar to unknown protein (pir||T01257)	102.537	85.0359	111.43	68.1197	64.8934	95.0095	108.383	81.0084	247386_at	P	P	P	P	P	P	P	P	93.7864	89.7751	79.9515	94.6959	0.957229	0.852484	1.0097	1.18442	1.05481
247385_at	At5g63420	embryo defective 2746 (emb2746); FUNCTIONS IN: hydrolase activity, DNA binding, catalytic activity; INVOLVED IN: metabolic process, embryo development ending in seed dormancy; LOCATED IN: chloroplast; EXPRESSED IN: 22 plant structures; EXPRESSED DURING: 13 growth stages; CONTAINS InterPro DOMAIN/s: SANT, DNA-binding (InterPro:IPR001005), RNA-metabolising metallo-beta-lactamase (InterPro:IPR011108…	13.4543	15.3482	14.0257	12.5533	10.2674	14.6213	15.6707	13.4543	247385_at	P	P	P	P	P	P	P	P	14.4013	13.2895	12.4444	14.5625	0.922801	0.864114	1.0112	1.17021	1.09579
247383_at	At5g63410	Leucine-rich repeat protein kinase family protein; FUNCTIONS IN: protein serine/threonine kinase activity, protein kinase activity, ATP binding; INVOLVED IN: transmembrane receptor protein tyrosine kinase signaling pathway, protein amino acid phosphorylation; LOCATED IN: endomembrane system; EXPRESSED IN: 22 plant structures; EXPRESSED DURING: 13 growth stages; CONTAINS InterPro DOMAIN/s: Protein…	337.794	300.246	347.291	319.573	481.036	357.054	367.093	326.288	247383_at	P	P	P	P	P	P	P	P	319.02	333.432	419.045	346.69	1.04518	1.31354	1.08673	0.827334	1.03976
247382_at	At5g63400	encodes a protein similar to adenylate kinase.	145.009	163.144	172.446	173.645	142.025	147.033	176.069	171.255	247382_at	P	P	P	P	P	P	P	P	154.076	173.046	144.529	173.662	1.12312	0.938035	1.12712	1.20157	1.00356
247381_at	At5g63390	O-fucosyltransferase family protein; CONTAINS InterPro DOMAIN/s: GDP-fucose protein O-fucosyltransferase (InterPro:IPR019378); BEST Arabidopsis thaliana protein match is: O-fucosyltransferase family protein (TAIR:AT2G44500.1); Has 826 Blast hits to 816 proteins in 29 species: Archae - 0; Bacteria - 0; Metazoa - 0; Fungi - 0; Plants - 826; Viruses - 0; Other Eukaryotes - 0 (source: NCBI BLink).	17.7531	16	17.6305	13.8326	17.7531	15.2422	14.9285	16.3362	247381_at	A	A	A	A	A	A	A	A	16.8766	15.7315	16.4977	15.6324	0.932153	0.977549	0.926277	0.94755	0.993696
247380_at	At5g63380	Encodes a peroxisomal protein involved in the activation of fatty acids through esterification with CoA. At5g63380 preferentially activates fatty acids with increased chain length (C9:0 to C8:0) and thus shares characteristics with long-chain fatty acyl-CoA synthases. Also able to catalyze the conversion of OPDA to its CoA ester and is therefore thought to be involved in the peroxisomal &#946;-ox…	86.2229	89.8845	83.8652	78.249	55.7152	76.1093	73.0089	74.028	247380_at	P	P	P	P	P	P	P	P	88.0537	81.0571	65.9122	73.5185	0.920541	0.748546	0.834927	1.1154	0.906996
247384_at	At5g63370	Protein kinase superfamily protein; FUNCTIONS IN: protein serine/threonine kinase activity, protein kinase activity, kinase activity, ATP binding; INVOLVED IN: protein amino acid phosphorylation; LOCATED IN: cellular_component unknown; EXPRESSED IN: 24 plant structures; EXPRESSED DURING: 15 growth stages; CONTAINS InterPro DOMAIN/s: Protein kinase, catalytic domain (InterPro:IPR000719), Serine/th…	166.572	170.072	157.586	160.898	171.255	184.823	179.769	192.672	247384_at	P	P	P	P	P	P	P	P	168.322	159.242	178.039	186.22	0.946058	1.05773	1.10633	1.04595	1.16942
247379_at	At5g63360	unknown protein	9.38268	9.06307	9.12611	8.11168	18.6357	8.81524	8.87656	8.39773	247379_at	P	P	P	A	P	A	P	P	9.22288	8.61889	13.7255	8.63714	0.934513	1.4882	0.936492	0.629278	1.00212
247369_at	At5g63340	unknown protein; Has 1 Blast hits to 1 proteins in 1 species: Archae - 0; Bacteria - 0; Metazoa - 0; Fungi - 0; Plants - 1; Viruses - 0; Other Eukaryotes - 0 (source: NCBI BLink).	8.28212	6.77396	6.77396	6.9644	6.45313	8.1681	6.54322	7.3615	247369_at	A	A	A	A	A	A	A	A	7.52804	6.86918	7.31062	6.95236	0.91248	0.971118	0.923528	0.950995	1.01211
247368_at	At5g63330	putative protein contains similarity to kinase	86.2229	81.5719	89.8845	75.0614	86.8227	76.1093	86.8227	74.5429	247368_at	P	P	P	P	P	P	P	P	83.8974	82.473	81.466	80.6828	0.983021	0.971019	0.961684	0.990387	0.978294
247370_at	At5g63320	Encodes NPX1 (Nuclear Protein X1), a nuclear factor regulating abscisic acid responses.	77.7085	67.6492	58.4852	63.1189	78.7932	57.68	71.0124	55.7152	247370_at	P	P	P	P	P	P	P	P	72.6788	60.8021	68.2366	63.3638	0.836586	0.938879	0.871834	0.92859	1.04213
247376_at	At5g63310	Maintains intracellular dNTP levels except ATP. Plays a role in response to oxidative stress and UV. Involved in phytochrome-mediated light signaling. Participates in auxin-regulated processes, partly through the modulation of auxin transport. H-bonding with His-197 inside the nucleotide-binding pocket is critical for NDPK2 functioning.	95.6704	100.427	124.5	90.5097	116.97	103.25	121.095	100.427	247376_at	P	P	P	P	P	P	P	P	98.0486	107.505	110.11	110.761	1.09644	1.12302	1.12966	1.00591	1.03029
247367_at	At5g63290	CPO3 (At5g63290) has not been characterized per se, but is a homolog of the CPDH/HEMN (see review by Layer et al, 2010). The homolog from cyanobacteria was recently characterized to be a CPDH (see Goto et al, 2010), but not yet from plants.	18.8959	16.1113	15.7797	15.0324	22.3159	14.5203	17.5087	16	247367_at	P	P	P	P	P	P	P	P	17.5036	15.406	18.4181	16.7543	0.880165	1.05225	0.957195	0.909668	1.08752
247372_at	At5g63280	C2H2-like zinc finger protein; FUNCTIONS IN: zinc ion binding, nucleic acid binding; INVOLVED IN: biological_process unknown; LOCATED IN: endomembrane system, intracellular; EXPRESSED IN: 22 plant structures; EXPRESSED DURING: 13 growth stages; CONTAINS InterPro DOMAIN/s: Zinc finger, C2H2-like (InterPro:IPR015880), Zinc finger, C2H2-type (InterPro:IPR007087); BEST Arabidopsis thaliana protein ma…	65.3448	73.5167	78.7932	66.257	153.277	58.4852	69.0706	66.7178	247372_at	P	P	P	P	P	P	P	P	69.4307	72.5251	105.881	67.8942	1.04457	1.52499	0.97787	0.64123	0.936148
247366_at	At5g63260	Zinc finger C-x8-C-x5-C-x3-H type family protein; FUNCTIONS IN: zinc ion binding, nucleic acid binding; INVOLVED IN: biological_process unknown; EXPRESSED IN: 24 plant structures; EXPRESSED DURING: 14 growth stages; CONTAINS InterPro DOMAIN/s: Zinc finger, CCCH-type (InterPro:IPR000571); BEST Arabidopsis thaliana protein match is: Zinc finger C-x8-C-x5-C-x3-H type family protein (TAIR:AT3G48440.1…	36.7583	42.2243	39.9466	33.8246	51.6251	37.7918	35.7532	36.7583	247366_at	A	P	P	P	P	P	P	P	39.4913	36.8856	44.7084	36.2558	0.934018	1.13211	0.91807	0.810938	0.982925
247365_at	At5g63220	unknown protein; CONTAINS InterPro DOMAIN/s: Uncharacterised protein family UPF0363 (InterPro:IPR007317); Has 304 Blast hits to 301 proteins in 161 species: Archae - 0; Bacteria - 0; Metazoa - 110; Fungi - 121; Plants - 35; Viruses - 0; Other Eukaryotes - 38 (source: NCBI BLink).	43.7133	46.2057	42.2243	50.9143	49.18	44.0173	48.5029	49.5221	247365_at	P	P	P	P	P	P	P	P	44.9595	46.5693	46.5987	49.0125	1.03581	1.03646	1.09015	1.0518	1.05246
247364_at	At5g63210	putative protein similar to unknown protein (pir||F69210)	99.0442	101.829	110.661	96.3358	156.498	99.0442	104.691	97.6806	247364_at	P	P	P	P	P	P	P	P	100.436	103.498	127.771	101.186	1.03049	1.27216	1.00746	0.791932	0.977659
247363_at	At5g63200	tetratricopeptide repeat (TPR)-containing protein; FUNCTIONS IN: binding; INVOLVED IN: biological_process unknown; LOCATED IN: cellular_component unknown; EXPRESSED IN: 22 plant structures; EXPRESSED DURING: 13 growth stages; CONTAINS InterPro DOMAIN/s: Tetratricopeptide TPR-1 (InterPro:IPR001440), Tetratricopeptide-like helical (InterPro:IPR011990), Tetratricopeptide repeat-containing (InterPro:…	64	68.5935	69.551	60.5477	48.1679	66.257	58.892	63.1189	247363_at	A	P	A	A	A	A	P	P	66.2968	65.0494	57.2124	61.0055	0.981185	0.862975	0.920188	1.0663	0.937833
247374_at	At5g63190	MA3 domain-containing protein; CONTAINS InterPro DOMAIN/s: Initiation factor eIF-4 gamma, MA3 (InterPro:IPR003891); BEST Arabidopsis thaliana protein match is: MA3 domain-containing protein (TAIR:AT3G48390.1); Has 1948 Blast hits to 791 proteins in 110 species: Archae - 0; Bacteria - 0; Metazoa - 1230; Fungi - 12; Plants - 571; Viruses - 0; Other Eukaryotes - 135 (source: NCBI BLink).	243.875	237.207	276.282	206.5	290.018	238.856	245.572	233.941	247374_at	P	P	P	P	P	P	P	P	240.541	241.391	264.437	239.756	1.00354	1.09934	0.996738	0.906666	0.993226
247377_at	At5g63180	Pectin lyase-like superfamily protein; CONTAINS InterPro DOMAIN/s: Pectin lyase fold/virulence factor (InterPro:IPR011050), AmbAllergen (InterPro:IPR018082), Pectate lyase/Amb allergen (InterPro:IPR002022), Pectin lyase fold (InterPro:IPR012334), Parallel beta-helix repeat (InterPro:IPR006626); BEST Arabidopsis thaliana protein match is: Pectin lyase-like superfamily protein (TAIR:AT4G24780.2); H…	13.4543	15.0324	13.2691	12.9063	17.0299	13.737	12.2101	15.8895	247377_at	A	A	A	A	P	A	A	A	14.2434	13.0877	15.3835	14.0498	0.918863	1.08005	0.986409	0.913303	1.07351
247373_at	At5g63150	unknown protein; FUNCTIONS IN: molecular_function unknown; INVOLVED IN: biological_process unknown; LOCATED IN: mitochondrion; EXPRESSED IN: 22 plant structures; EXPRESSED DURING: 13 growth stages; CONTAINS InterPro DOMAIN/s: Protein of unknown function DUF1713, mitochondria (InterPro:IPR013177); Has 30201 Blast hits to 17322 proteins in 780 species: Archae - 12; Bacteria - 1396; Metazoa - 17338;…	45.8866	44.0173	38.8542	37.5307	26.9087	49.18	51.9842	45.2548	247373_at	P	P	P	P	P	P	P	P	44.952	38.1925	38.0443	48.6195	0.849629	0.846334	1.08159	1.27797	1.27301
247362_at	At5g63140	purple acid phosphatase 29 (PAP29); FUNCTIONS IN: protein serine/threonine phosphatase activity, acid phosphatase activity; LOCATED IN: endomembrane system; EXPRESSED IN: 23 plant structures; EXPRESSED DURING: 13 growth stages; CONTAINS InterPro DOMAIN/s: Metallophosphoesterase (InterPro:IPR004843), Phosphoesterase At2g46880 (InterPro:IPR011230); BEST Arabidopsis thaliana protein match is: purple…	32.6724	30.2738	34.2968	48.1679	34.5353	69.551	49.5221	64.4452	247362_at	P	P	P	P	P	P	P	P	31.4731	41.2323	52.0432	56.9836	1.31008	1.65358	1.81055	1.09493	1.38201
247375_at	At5g63135	unknown protein; Has 30201 Blast hits to 17322 proteins in 780 species: Archae - 12; Bacteria - 1396; Metazoa - 17338; Fungi - 3422; Plants - 5037; Viruses - 0; Other Eukaryotes - 2996 (source: NCBI BLink).	62.2499	54.1917	56.1028	64.4452	35.261	59.3016	59.7141	64	247375_at	P	P	P	P	P	P	P	P	58.2208	60.274	47.2813	61.8571	1.03526	0.812103	1.06246	1.30828	1.02626
247393_at	At5g63130	Octicosapeptide/Phox/Bem1p family protein; CONTAINS InterPro DOMAIN/s: Octicosapeptide/Phox/Bem1p (InterPro:IPR000270); BEST Arabidopsis thaliana protein match is: Octicosapeptide/Phox/Bem1p family protein (TAIR:AT3G48240.1); Has 353 Blast hits to 353 proteins in 15 species: Archae - 0; Bacteria - 0; Metazoa - 0; Fungi - 0; Plants - 353; Viruses - 0; Other Eukaryotes - 0 (source: NCBI BLink).	17.2677	24.761	39.3966	38.8542	67.6492	68.5935	51.9842	86.2229	247393_at	A	A	P	P	P	P	P	P	21.0143	39.1254	68.1213	69.1036	1.86184	3.24166	3.2884	1.01442	1.76621		1	1
247378_at	At5g63120	P-loop containing nucleoside triphosphate hydrolases superfamily protein; FUNCTIONS IN: helicase activity, nucleic acid binding, ATP binding, ATP-dependent helicase activity; EXPRESSED IN: 22 plant structures; EXPRESSED DURING: 10 growth stages; CONTAINS InterPro DOMAIN/s: DNA/RNA helicase, DEAD/DEAH box type, N-terminal (InterPro:IPR011545), RNA helicase, DEAD-box type, Q motif (InterPro:IPR0140…	47.5048	54.5686	48.1679	40.7859	14.6213	47.1766	48.5029	47.5048	247378_at	P	P	P	P	P	P	P	P	51.0367	44.4769	30.899	48.0038	0.871469	0.605426	0.940575	1.55357	1.0793
247371_at	At5g63110	RPD3-like histone deacetylase. HDA6 mutations specifically increase the expression of auxin-responsive transgenes, suggesting a role in transgene silencing.	130.69	137.187	141.044	137.187	106.153	126.238	121.938	125.366	247371_at	P	P	P	P	P	P	P	P	133.938	139.115	116.195	123.652	1.03865	0.867529	0.923199	1.06417	0.888843
247420_at	At5g63100	S-adenosyl-L-methionine-dependent methyltransferases superfamily protein; INVOLVED IN: biological_process unknown; LOCATED IN: chloroplast; EXPRESSED IN: 18 plant structures; EXPRESSED DURING: 12 growth stages; BEST Arabidopsis thaliana protein match is: S-adenosyl-L-methionine-dependent methyltransferases superfamily protein (TAIR:AT5G44600.1); Has 163 Blast hits to 163 proteins in 58 species: A…	15.7797	17.6305	14.6213	16.4498	13.3614	11.4716	17.7531	13.8326	247420_at	P	P	P	P	A	A	P	P	16.7051	15.5356	12.4165	15.7929	0.929989	0.743277	0.945391	1.27192	1.01656
247419_at	At5g63080	2-oxoglutarate (2OG) and Fe(II)-dependent oxygenase superfamily protein; CONTAINS InterPro DOMAIN/s: Transcription factor jumonji/aspartyl beta-hydroxylase (InterPro:IPR003347), Transcription factor jumonji (InterPro:IPR013129); BEST Arabidopsis thaliana protein match is: transferases, transferring glycosyl groups (TAIR:AT1G78280.1); Has 35333 Blast hits to 34131 proteins in 2444 species: Archae …	115.36	107.635	136.239	116.97	184.823	117.784	116.97	96.3358	247419_at	P	P	P	P	P	P	P	P	111.497	126.605	151.303	106.653	1.1355	1.35701	0.956552	0.704895	0.842409
247416_at	At5g63070	Ribosomal protein S19 family protein; FUNCTIONS IN: structural constituent of ribosome, RNA binding; INVOLVED IN: translation; LOCATED IN: cytosolic small ribosomal subunit, ribosome; EXPRESSED IN: leaf whorl, flower; EXPRESSED DURING: 4 anthesis; CONTAINS InterPro DOMAIN/s: Ribosomal protein S15, eukaryotic/archaeal (InterPro:IPR005713), Ribosomal protein S19/S15 (InterPro:IPR002222), Ribosomal …	5.9794	5.54044	6.06287	7.6211	6.32033	5.61778	6.06287	6.10504	247416_at	A	A	A	A	A	A	A	A	5.75992	6.84199	5.96905	6.08395	1.18786	1.03631	1.05626	1.01925	0.889209
247415_at	At5g63060	Sec14p-like phosphatidylinositol transfer family protein; FUNCTIONS IN: transporter activity; INVOLVED IN: transport; LOCATED IN: chloroplast; EXPRESSED IN: 22 plant structures; EXPRESSED DURING: 13 growth stages; CONTAINS InterPro DOMAIN/s: Cellular retinaldehyde-binding/triple function, C-terminal (InterPro:IPR001251), Phosphatidylinositol transfer protein-like, N-terminal (InterPro:IPR011074);…	19.1597	20.8215	18.7654	18.7654	38.5859	18.7654	18.507	19.9733	247415_at	M	M	P	P	P	M	M	P	19.9906	18.7654	28.6756	19.2401	0.938711	1.43446	0.962462	0.670959	1.0253
247414_at	At5g63050	embryo defective 2759 (EMB2759); Has 24 Blast hits to 24 proteins in 9 species: Archae - 0; Bacteria - 0; Metazoa - 0; Fungi - 0; Plants - 24; Viruses - 0; Other Eukaryotes - 0 (source: NCBI BLink).	91.7731	97.6806	82.7106	81.0084	93.7015	84.4485	83.8652	101.125	247414_at	P	P	P	P	P	P	P	P	94.7269	81.8595	89.075	92.4952	0.864164	0.940335	0.976441	1.0384	1.12993
247417_at	At5g63040	unknown protein; FUNCTIONS IN: molecular_function unknown; INVOLVED IN: biological_process unknown; LOCATED IN: chloroplast; EXPRESSED IN: 25 plant structures; EXPRESSED DURING: 15 growth stages; BEST Arabidopsis thaliana protein match is: unknown protein (TAIR:AT1G48460.1); Has 30201 Blast hits to 17322 proteins in 780 species: Archae - 12; Bacteria - 1396; Metazoa - 17338; Fungi - 3422; Plants …	26.3549	28.2465	32	27.6652	48.8403	29.0406	25.4572	23.2636	247417_at	P	P	P	P	P	P	P	P	27.3007	29.8326	38.9405	24.3604	1.09274	1.42635	0.892298	0.62558	0.816569
247418_at	At5g63030	Thioredoxin superfamily protein; FUNCTIONS IN: electron carrier activity, arsenate reductase (glutaredoxin) activity, protein disulfide oxidoreductase activity; INVOLVED IN: N-terminal protein myristoylation, cell redox homeostasis; LOCATED IN: cellular_component unknown; EXPRESSED IN: 24 plant structures; EXPRESSED DURING: 15 growth stages; CONTAINS InterPro DOMAIN/s: Thioredoxin fold (InterPro:…	272.479	259.574	284.05	222.861	270.597	266.871	298.172	286.026	247418_at	P	P	P	P	P	P	P	P	266.026	253.455	268.734	292.099	0.952746	1.01018	1.09801	1.08694	1.15247
247413_at	At5g63020	Disease resistance protein (CC-NBS-LRR class) family; FUNCTIONS IN: ATP binding; INVOLVED IN: N-terminal protein myristoylation, defense response; LOCATED IN: cellular_component unknown; CONTAINS InterPro DOMAIN/s: Leucine-rich repeat-containing protein (InterPro:IPR015766), NB-ARC (InterPro:IPR002182), Disease resistance protein (InterPro:IPR000767); BEST Arabidopsis thaliana protein match is: D…	11.0809	12.3805	10.7779	11.5514	14.42	11.0809	10.1261	10.1261	247413_at	A	A	A	A	A	A	P	A	11.7307	11.1647	12.7504	10.1261	0.951747	1.08693	0.86321	0.794173	0.906974
247412_at	At5g63010	Transducin/WD40 repeat-like superfamily protein; CONTAINS InterPro DOMAIN/s: WD40 repeat 2 (InterPro:IPR019782), WD40 repeat-like-containing domain (InterPro:IPR011046), WD40 repeat, conserved site (InterPro:IPR019775), WD40-repeat-containing domain (InterPro:IPR017986), WD40/YVTN repeat-like-containing domain (InterPro:IPR015943), WD40 repeat (InterPro:IPR001680), WD40 repeat, subgroup (InterPro…	29.0406	21.7057	29.6508	30.91	27.8576	26.7228	35.7532	26.3549	247412_at	P	A	P	A	P	P	P	A	25.3731	30.2804	27.2902	31.0541	1.1934	1.07556	1.22389	1.13792	1.02555
247411_at	At5g63000	Mitochondrial import inner membrane translocase subunit Tim17/Tim22/Tim23 family protein; FUNCTIONS IN: protein transporter activity; INVOLVED IN: protein transport; LOCATED IN: mitochondrial inner membrane; EXPRESSED IN: 22 plant structures; EXPRESSED DURING: 13 growth stages; CONTAINS InterPro DOMAIN/s: Mitochondrial inner membrane translocase complex, subunit Tim17/22 (InterPro:IPR003397); Has…	40.2244	51.9842	64.4452	58.0812	66.7178	54.9482	62.6829	41.9326	247411_at	P	P	P	P	P	P	P	P	46.1043	61.2632	60.833	52.3077	1.3288	1.31947	1.13455	0.859858	0.85382
247410_at	At5g62990	embryo defective 1692 (emb1692); CONTAINS InterPro DOMAIN/s: RNA recognition domain, plant (InterPro:IPR021099); BEST Arabidopsis thaliana protein match is: Ubiquitin carboxyl-terminal hydrolase family protein (TAIR:AT4G01037.1); Has 538 Blast hits to 532 proteins in 58 species: Archae - 0; Bacteria - 4; Metazoa - 48; Fungi - 18; Plants - 406; Viruses - 7; Other Eukaryotes - 55 (source: NCBI BLin…	11.6318	9.38268	10.1965	8.51496	12.6407	7.88986	11.7942	9.00047	247410_at	P	P	P	P	P	P	P	P	10.5072	9.35572	10.2653	10.3973	0.890408	0.976971	0.989539	1.01286	1.11133
247409_at	At5g62980	Encodes an enzyme that can act as a aldolase or an epimerase for 7,8-dihydroneopterin and 7,8-dihydromonapterin in vitro. It is likely to act in folate biosynthesis as a homooctamer in vivo.	98.36	91.1392	102.537	109.137	131.599	94.3532	115.36	88.0347	247409_at	P	P	P	P	P	P	P	P	94.7496	105.837	112.976	101.697	1.11702	1.19236	1.07333	0.900169	0.960886
247399_at	At5g62960	unknown protein; BEST Arabidopsis thaliana protein match is: unknown protein (TAIR:AT1G10660.1); Has 35333 Blast hits to 34131 proteins in 2444 species: Archae - 798; Bacteria - 22429; Metazoa - 974; Fungi - 991; Plants - 531; Viruses - 0; Other Eukaryotes - 9610 (source: NCBI BLink).	31.125	33.3589	30.4844	25.9921	35.261	29.8571	28.443	32.6724	247399_at	P	P	P	A	P	P	P	P	32.2419	28.2382	32.559	30.5577	0.875824	1.00983	0.947762	0.938532	1.08214
247398_at	At5g62950	RNA polymerase II, Rpb4, core protein; FUNCTIONS IN: DNA-directed RNA polymerase activity, catalytic activity, nucleotide binding; INVOLVED IN: cellular metabolic process, transcription; LOCATED IN: cellular_component unknown; EXPRESSED IN: 22 plant structures; EXPRESSED DURING: 13 growth stages; CONTAINS InterPro DOMAIN/s: HRDC-like (InterPro:IPR010997), RNA polymerase II, Rpb4 (InterPro:IPR0055…	109.896	86.8227	104.691	90.5097	154.343	91.1392	109.137	84.4485	247398_at	P	P	P	P	P	P	P	P	98.3595	97.6006	122.741	96.7929	0.992284	1.24788	0.984072	0.788593	0.991725
247397_at	At5g62940	HCA2 induces the formation of interfascicular cambium and regulates vascular tissue development in the aerial parts of the plant. Evidence from both gain of function and dominant negative alleles.	14.723	12.996	13.0864	12.9063	10.9283	13.5479	13.5479	14.9285	247397_at	P	P	P	A	A	P	P	P	13.8595	12.9964	12.2381	14.2382	0.93772	0.883012	1.02732	1.16343	1.09556
247396_at	At5g62930	SGNH hydrolase-type esterase superfamily protein; FUNCTIONS IN: hydrolase activity, hydrolase activity, acting on ester bonds, carboxylesterase activity; INVOLVED IN: lipid metabolic process; LOCATED IN: cellular_component unknown; EXPRESSED IN: 23 plant structures; EXPRESSED DURING: 14 growth stages; CONTAINS InterPro DOMAIN/s: Esterase, SGNH hydrolase-type, subgroup (InterPro:IPR013831), Lipase…	109.137	109.137	120.259	112.206	106.891	110.661	131.599	106.153	247396_at	P	P	P	P	P	P	P	P	109.137	116.232	108.776	118.876	1.06501	0.99669	1.08923	1.09285	1.02274
247406_at	At5g62920	Encodes a Type-A response regulator that is responsive to cytokinin treatment. Its C-ter domain is very short in comparison to other Arabidopsis ARRs (17 total). Arr6 protein is stabilized by cytokinin.	21.7057	23.9176	23.9176	19.6983	18.1261	20.1122	18.507	17.7531	247406_at	A	P	A	A	A	A	A	A	22.8116	21.8079	19.1192	18.1301	0.956001	0.838133	0.794773	0.948266	0.831351
247395_at	At5g62910	RING/U-box superfamily protein; FUNCTIONS IN: zinc ion binding; LOCATED IN: chloroplast; EXPRESSED IN: 24 plant structures; EXPRESSED DURING: 15 growth stages; CONTAINS InterPro DOMAIN/s: Zinc finger, RING-type (InterPro:IPR001841); BEST Arabidopsis thaliana protein match is: RING/U-box superfamily protein (TAIR:AT3G48070.2); Has 749 Blast hits to 665 proteins in 188 species: Archae - 0; Bacteria…	41.0696	36.5044	43.1115	35.261	41.9326	32.6724	37.014	32.4467	247395_at	P	P	P	P	P	P	P	P	38.787	39.1862	37.3025	34.7304	1.01029	0.961726	0.895412	0.931047	0.88629
247407_at	At5g62900	unknown protein; FUNCTIONS IN: molecular_function unknown; INVOLVED IN: N-terminal protein myristoylation; LOCATED IN: cellular_component unknown; EXPRESSED IN: 22 plant structures; EXPRESSED DURING: 12 growth stages; BEST Arabidopsis thaliana protein match is: unknown protein (TAIR:AT5G50090.1); Has 157 Blast hits to 157 proteins in 14 species: Archae - 0; Bacteria - 0; Metazoa - 0; Fungi - 0; P…	136.239	132.514	182.278	132.514	130.69	118.603	141.044	95.6704	247407_at	P	P	P	P	P	P	P	P	134.377	157.396	124.646	118.357	1.17131	0.92759	0.880786	0.949543	0.751969
247404_at	At5g62890	Xanthine/uracil permease family protein; FUNCTIONS IN: transmembrane transporter activity; INVOLVED IN: transport, transmembrane transport; LOCATED IN: cell wall, vacuole, membrane; EXPRESSED IN: 23 plant structures; EXPRESSED DURING: 13 growth stages; CONTAINS InterPro DOMAIN/s: Xanthine/uracil/vitamin C permease (InterPro:IPR006043); BEST Arabidopsis thaliana protein match is: Xanthine/uracil p…	144.007	146.018	148.056	125.366	118.603	101.829	124.5	132.514	247404_at	P	P	P	P	P	P	P	P	145.013	136.711	110.216	128.507	0.942752	0.760044	0.886177	1.16596	0.93999
247405_at	At5g62880	A member of ROP GTPase gene family.	93.7015	88.647	87.4266	81.5719	45.2548	89.8845	92.4115	91.1392	247405_at	P	P	P	P	P	P	P	P	91.1742	84.4992	67.5697	91.7753	0.926788	0.741105	1.00659	1.35823	1.08611
247394_at	At5g62860	F-box associated ubiquitination effector family protein; CONTAINS InterPro DOMAIN/s: F-box associated domain, type 3 (InterPro:IPR013187), F-box associated interaction domain (InterPro:IPR017451); BEST Arabidopsis thaliana protein match is: F-box and associated interaction domains-containing protein (TAIR:AT1G32420.1); Has 451 Blast hits to 435 proteins in 12 species: Archae - 0; Bacteria - 0; Me…	24.4201	32.4467	39.3966	37.014	33.1285	50.5626	44.6318	34.2968	247394_at	P	P	P	P	P	P	P	P	28.4334	38.2053	41.8456	39.4643	1.34368	1.4717	1.38795	0.943093	1.03295
247424_at	At5g62850	Encodes a protein that is expressed in vegetative cells of pollen.	12.3805	12.295	12.295	11.7127	12.295	12.1257	10.7034	11.5514	247424_at	A	P	A	A	A	A	A	A	12.3378	12.0038	12.2104	11.1274	0.972935	0.989674	0.9019	0.91131	0.926989
247400_at	At5g62840	Phosphoglycerate mutase family protein; FUNCTIONS IN: catalytic activity; INVOLVED IN: metabolic process; LOCATED IN: chloroplast; EXPRESSED IN: 20 plant structures; EXPRESSED DURING: 13 growth stages; CONTAINS InterPro DOMAIN/s: Histidine phosphatase superfamily, clade-1 (InterPro:IPR013078), Twin-arginine translocation pathway, signal sequence (InterPro:IPR006311); Has 111 Blast hits to 111 pro…	23.7524	28.6408	21.4068	20.9663	38.3193	27.8576	23.1029	19.9733	247400_at	P	P	P	P	P	P	P	P	26.1966	21.1866	33.0885	21.5381	0.808753	1.26308	0.822171	0.650924	1.01659
247423_at	At5g62830	F-box associated ubiquitination effector family protein; CONTAINS InterPro DOMAIN/s: F-box associated domain, type 1 (InterPro:IPR006527), F-box associated interaction domain (InterPro:IPR017451); BEST Arabidopsis thaliana protein match is: F-box and associated interaction domains-containing protein (TAIR:AT3G17560.1); Has 876 Blast hits to 855 proteins in 13 species: Archae - 0; Bacteria - 0; Me…	7.21	7.46426	7.6211	9.64646	7.67411	8.22491	7.01285	8.28212	247423_at	A	A	P	A	A	A	P	P	7.33713	8.63378	7.94951	7.64748	1.17672	1.08346	1.0423	0.962007	0.885763
247422_at	At5g62810	mutant has a defect in the intracellular transport of thiolase from the cytosol to glyoxysomes (formerly known as ped2)	357.054	377.413	312.996	328.557	352.139	347.291	319.573	304.437	247422_at	P	P	P	P	P	P	P	P	367.234	320.776	349.715	312.005	0.873494	0.952295	0.849608	0.89217	0.972655
247421_at	At5g62800	Protein with RING/U-box and TRAF-like domains; FUNCTIONS IN: ubiquitin-protein ligase activity, zinc ion binding; INVOLVED IN: multicellular organismal development, protein ubiquitination, ubiquitin-dependent protein catabolic process; LOCATED IN: nucleus; EXPRESSED IN: stem; CONTAINS InterPro DOMAIN/s: TRAF-like (InterPro:IPR008974), Seven-in-absentia protein, TRAF-like domain (InterPro:IPR01812…	8.69388	9.78112	10.4107	9.25351	8.51496	10.8528	8.57419	9.44794	247421_at	A	A	P	A	A	A	A	A	9.2375	9.83212	9.6839	9.01106	1.06437	1.04832	0.975487	0.93052	0.916493
247401_at	At5g62790	1-Deoxy-d-xylulose 5-phosphate reductoisomerase (DXR) catalyzes the first committed step of the 2-C-methyl-d-erythritol 4-phosphate pathway for isoprenoid biosynthesis. In Arabidopsis, DXR is encoded by a single-copy gene. Arabidopsis DXR is targeted to plastids and localizes into chloroplasts of leaf cells. DXR knockout or strongly silenced lines have a seedling lethal, albino phenotype. Transge…	537.455	568.1	471.136	487.751	608.874	572.051	515.561	481.036	247401_at	P	P	P	P	P	P	P	P	552.777	479.443	590.463	498.298	0.867336	1.06817	0.901445	0.843912	1.03933
247448_at	At5g62770	Protein of unknown function (DUF1645); CONTAINS InterPro DOMAIN/s: Protein of unknown function DUF1645 (InterPro:IPR012442); BEST Arabidopsis thaliana protein match is: Protein of unknown function (DUF1645) (TAIR:AT1G70420.1); Has 173 Blast hits to 173 proteins in 20 species: Archae - 0; Bacteria - 0; Metazoa - 5; Fungi - 2; Plants - 161; Viruses - 0; Other Eukaryotes - 5 (source: NCBI BLink).	75.0614	73.0089	106.153	93.7015	43.7133	81.0084	86.2229	89.8845	247448_at	P	P	P	P	A	P	P	P	74.0352	99.9272	62.3609	88.0537	1.34973	0.842314	1.18935	1.412	0.881179
247408_at	At5g62760	P-loop containing nucleoside triphosphate hydrolases superfamily protein; Has 7376 Blast hits to 5164 proteins in 470 species: Archae - 2; Bacteria - 500; Metazoa - 3049; Fungi - 1087; Plants - 1477; Viruses - 399; Other Eukaryotes - 862 (source: NCBI BLink).	19.5622	21.1121	19.4271	15.455	11.1579	16	19.2929	19.4271	247408_at	P	P	P	P	P	P	P	P	20.3372	17.441	13.579	19.36	0.857594	0.667692	0.951952	1.42574	1.11003
247402_at	At5g62750	unknown protein; Has 24942 Blast hits to 11726 proteins in 897 species: Archae - 48; Bacteria - 2086; Metazoa - 8361; Fungi - 2243; Plants - 1040; Viruses - 210; Other Eukaryotes - 10954 (source: NCBI BLink).	5.85634	5.61778	6.1475	5.42642	5.77572	5.35171	5.27803	5.89708	247402_at	P	A	P	A	A	A	P	P	5.73706	5.78696	5.56371	5.58755	1.0087	0.969785	0.97394	1.00429	0.965542
247403_at	At5g62740	HYPERSENSITIVE-INDUCED RESPONSE PROTEIN 1 (HIR1); INVOLVED IN: N-terminal protein myristoylation; LOCATED IN: plasma membrane, vacuole, membrane; EXPRESSED IN: 25 plant structures; EXPRESSED DURING: 15 growth stages; CONTAINS InterPro DOMAIN/s: Band 7 protein (InterPro:IPR001107); BEST Arabidopsis thaliana protein match is: SPFH/Band 7/PHB domain-containing membrane-associated protein family (TAI…	719.076	661.685	670.921	458.253	867.067	617.374	643.591	652.575	247403_at	P	P	P	P	P	P	P	P	690.38	564.587	742.22	648.083	0.817792	1.07509	0.938733	0.873168	1.14789
247447_at	At5g62730	Major facilitator superfamily protein; FUNCTIONS IN: transporter activity; INVOLVED IN: oligopeptide transport; LOCATED IN: membrane; EXPRESSED IN: 19 plant structures; EXPRESSED DURING: 12 growth stages; CONTAINS InterPro DOMAIN/s: Oligopeptide transporter (InterPro:IPR000109), Major facilitator superfamily, general substrate transporter (InterPro:IPR016196); BEST Arabidopsis thaliana protein ma…	6.6807	7.6211	8.28212	9.64646	6.6807	7.31065	6.49802	6.86852	247447_at	P	P	P	P	A	A	A	A	7.1509	8.96429	6.99568	6.68327	1.25359	0.978293	0.934605	0.955343	0.745544
247443_at	At5g62720	Integral membrane HPP family protein; FUNCTIONS IN: molecular_function unknown; INVOLVED IN: biological_process unknown; LOCATED IN: integral to membrane, chloroplast inner membrane, chloroplast envelope; EXPRESSED IN: 22 plant structures; EXPRESSED DURING: 13 growth stages; CONTAINS InterPro DOMAIN/s: HPP (InterPro:IPR007065); BEST Arabidopsis thaliana protein match is: Integral membrane HPP fam…	93.7015	56.8859	88.647	57.2816	63.1189	61.8199	78.249	58.0812	247443_at	P	P	P	P	P	P	P	P	75.2937	72.9643	62.4694	68.1651	0.969062	0.829676	0.905323	1.09118	0.934225
247441_at	At5g62710	Leucine-rich repeat protein kinase family protein; FUNCTIONS IN: protein serine/threonine kinase activity, protein kinase activity, ATP binding; INVOLVED IN: protein amino acid phosphorylation; LOCATED IN: endomembrane system; EXPRESSED IN: 21 plant structures; EXPRESSED DURING: 13 growth stages; CONTAINS InterPro DOMAIN/s: Protein kinase, ATP binding site (InterPro:IPR017441), Protein kinase, ca…	24.0839	21.7057	23.9176	25.8125	28.443	16.6795	22.4711	23.2636	247441_at	P	P	P	P	P	P	P	P	22.8948	24.8651	22.5612	22.8673	1.08606	0.985429	0.9988	1.01357	0.919657
247442_s_at	At5g62690	encodes tubulin beta-2/beta-3 chain	413.001	455.087	418.766	445.722	196.72	362.039	421.679	430.539	247442_s_at	P	P	P	P	P	P	P	P	434.044	432.244	279.379	426.109	0.995853	0.643666	0.981718	1.5252	0.985806
247440_at	At5g62680	Major facilitator superfamily protein; FUNCTIONS IN: transporter activity; INVOLVED IN: oligopeptide transport, response to karrikin; LOCATED IN: plasma membrane, membrane; EXPRESSED IN: 23 plant structures; EXPRESSED DURING: 13 growth stages; CONTAINS InterPro DOMAIN/s: Oligopeptide transporter (InterPro:IPR000109), Major facilitator superfamily, general substrate transporter (InterPro:IPR016196…	903.888	1016.93	1314.23	1016.93	820.296	975.501	879.171	831.746	247440_at	P	P	P	P	P	P	P	P	960.407	1165.58	897.898	855.459	1.21363	0.934914	0.890725	0.952734	0.733936
247439_at	At5g62670	H(+)-ATPase 11 (HA11); FUNCTIONS IN: ATPase activity; INVOLVED IN: cation transport, metabolic process, ATP biosynthetic process; LOCATED IN: plasma membrane, membrane; EXPRESSED IN: 26 plant structures; EXPRESSED DURING: 14 growth stages; CONTAINS InterPro DOMAIN/s: ATPase, P-type, ATPase-associated domain (InterPro:IPR008250), ATPase, P-type cation-transporter, N-terminal (InterPro:IPR004014), …	53.4456	85.0359	46.2057	57.68	47.1766	59.7141	52.7098	67.1819	247439_at	P	P	P	P	P	P	P	P	69.2408	51.9429	53.4454	59.9458	0.750178	0.771877	0.86576	1.12163	1.15407
247446_at	At5g62650	Tic22-like family protein; CONTAINS InterPro DOMAIN/s: Tic22-like (InterPro:IPR007378); Has 30201 Blast hits to 17322 proteins in 780 species: Archae - 12; Bacteria - 1396; Metazoa - 17338; Fungi - 3422; Plants - 5037; Viruses - 0; Other Eukaryotes - 2996 (source: NCBI BLink).	183.546	188.706	166.572	227.544	232.325	184.823	165.421	183.546	247446_at	P	P	P	P	P	P	P	P	186.126	197.058	208.574	174.484	1.05873	1.1206	0.937448	0.836556	0.885445
247445_at	At5g62640	nuclear targeted protein involved in flowering time regulation that affects flowering time independent of FLC	86.8227	100.427	88.647	85.0359	93.7015	83.2859	92.4115	90.5097	247445_at	P	P	P	P	P	P	P	P	93.6247	86.8414	88.4937	91.4606	0.927548	0.945196	0.976885	1.03353	1.05319
247444_at	At5g62630	hipl2 protein precursor (HIPL2); FUNCTIONS IN: catalytic activity; INVOLVED IN: biological_process unknown; LOCATED IN: anchored to plasma membrane, plasma membrane, anchored to membrane; EXPRESSED IN: 17 plant structures; EXPRESSED DURING: 11 growth stages; CONTAINS InterPro DOMAIN/s: Soluble quinoprotein glucose/sorbosone dehydrogenase (InterPro:IPR011041), Folate receptor, conserved region (In…	26.1729	20.5348	24.761	23.9176	39.6706	22.6274	16	14.3204	247444_at	A	A	A	A	A	A	A	A	23.3538	24.3393	31.149	15.1602	1.0422	1.33379	0.649152	0.486699	0.622869
247429_at	At5g62620	Galactosyltransferase family protein; FUNCTIONS IN: transferase activity, transferring hexosyl groups, sugar binding, galactosyltransferase activity; INVOLVED IN: protein amino acid glycosylation; LOCATED IN: chloroplast; EXPRESSED IN: 22 plant structures; EXPRESSED DURING: 13 growth stages; CONTAINS InterPro DOMAIN/s: Galectin, carbohydrate recognition domain (InterPro:IPR001079), Glycosyl trans…	155.417	139.102	167.73	157.586	274.374	174.853	162.017	200.854	247429_at	P	P	P	P	P	P	P	P	147.26	162.658	224.614	181.435	1.10457	1.52529	1.23208	0.807766	1.11544
247430_at	At5g62610	basic helix-loop-helix (bHLH) DNA-binding superfamily protein; FUNCTIONS IN: DNA binding, sequence-specific DNA binding transcription factor activity; INVOLVED IN: regulation of transcription; LOCATED IN: nucleus, chloroplast; EXPRESSED IN: 22 plant structures; EXPRESSED DURING: 13 growth stages; CONTAINS InterPro DOMAIN/s: Helix-loop-helix DNA-binding domain (InterPro:IPR001092), Helix-loop-heli…	349.706	328.557	333.144	304.437	424.612	335.461	340.144	319.573	247430_at	P	P	P	P	P	P	P	P	339.132	318.79	380.036	329.858	0.940019	1.12062	0.972655	0.867965	1.03472
247428_at	At5g62590	unknown protein	121.095	132.514	141.044	114.563	179.769	126.238	125.366	145.009	247428_at	P	P	P	P	P	P	P	P	126.805	127.804	153.003	135.187	1.00788	1.20661	1.06611	0.883559	1.05778
247427_at	At5g62580	ARM repeat superfamily protein; FUNCTIONS IN: binding; INVOLVED IN: biological_process unknown; LOCATED IN: cellular_component unknown; EXPRESSED IN: 22 plant structures; EXPRESSED DURING: 13 growth stages; CONTAINS InterPro DOMAIN/s: HEAT (InterPro:IPR000357), Armadillo-type fold (InterPro:IPR016024); BEST Arabidopsis thaliana protein match is: ARM repeat superfamily protein (TAIR:AT1G27210.1); …	102.537	135.298	56.8859	94.3532	129.787	95.6704	81.0084	123.64	247427_at	P	P	P	P	P	P	P	P	118.918	75.6196	112.729	102.324	0.635899	0.947955	0.860462	0.907704	1.35314
247434_at	At5g62575	unknown protein; FUNCTIONS IN: molecular_function unknown; INVOLVED IN: biological_process unknown; EXPRESSED IN: 25 plant structures; EXPRESSED DURING: 15 growth stages; BEST Arabidopsis thaliana protein match is: unknown protein (TAIR:AT3G47833.1); Has 35333 Blast hits to 34131 proteins in 2444 species: Archae - 798; Bacteria - 22429; Metazoa - 974; Fungi - 991; Plants - 531; Viruses - 0; Other…	90.5097	74.5429	98.36	95.6704	57.2816	85.6274	104.691	88.647	247434_at	P	P	P	P	P	P	P	P	82.5263	97.0152	71.4545	96.6692	1.17557	0.865839	1.17137	1.35288	0.996434
247426_at	At5g62570	Calmodulin binding protein-like; FUNCTIONS IN: calmodulin binding; INVOLVED IN: biological_process unknown; LOCATED IN: cellular_component unknown; EXPRESSED IN: 22 plant structures; EXPRESSED DURING: 13 growth stages; CONTAINS InterPro DOMAIN/s: Calmodulin binding protein-like (InterPro:IPR012416); BEST Arabidopsis thaliana protein match is: Calmodulin-binding protein (TAIR:AT4G25800.2).	166.572	178.527	198.088	310.834	439.586	458.253	266.871	471.136	247426_at	P	P	P	P	P	P	P	P	172.549	254.461	448.919	369.004	1.47471	2.60168	2.13854	0.821982	1.45014		1
247425_at	At5g62550	unknown protein; FUNCTIONS IN: molecular_function unknown; INVOLVED IN: biological_process unknown; LOCATED IN: plasma membrane; EXPRESSED IN: 17 plant structures; EXPRESSED DURING: 9 growth stages; Has 14949 Blast hits to 9947 proteins in 971 species: Archae - 43; Bacteria - 3248; Metazoa - 4424; Fungi - 1542; Plants - 562; Viruses - 55; Other Eukaryotes - 5075 (source: NCBI BLink).	7.21	8.11168	7.46426	8.1681	7.4127	7.06162	6.19026	6.9163	247425_at	A	P	A	A	P	A	A	P	7.66084	7.81618	7.23716	6.55328	1.02028	0.944696	0.855426	0.905504	0.838425
247433_at	At5g62540	Encodes a protein predicted to be an E2 ubiquitin conjugating enzyme. It appears homologous to the RAD6 protein in yeast implicated in histone ubiquitination, but, UBC3 has not been experimentally associated with this process.	195.361	203.657	184.823	222.861	259.574	215.269	229.126	222.861	247433_at	P	P	P	P	P	P	P	P	199.509	203.842	237.422	225.994	1.02172	1.19003	1.13275	0.951867	1.10867
247436_at	At5g62530	Encodes mitochondrial Delta-pyrroline-5- carboxylate dehydrogenase. Involved in the catabolism of proline to glutamate. Involved in protection from proline toxicity. Induced at pathogen infection sites. P5CDH and SRO5 (an overlapping gene in the sense orientation) generate 24-nt and 21-nt siRNAs, which together are components of a regulatory loop controlling reactive oxygen species (ROS) producti…	52.3457	67.6492	72.0037	77.7085	25.9921	74.028	74.028	65.7993	247436_at	P	P	P	P	P	P	P	P	59.9974	74.8561	50.0101	69.9137	1.24765	0.833537	1.16528	1.39799	0.933974
247431_at	At5g62520	Encodes a protein with similarity to RCD1 but without the WWE domain. The protein does have a PARP signature upstream of the C-terminal protein interaction domain. The PARP signature may bind NAD+ and attach the ADP-ribose-moiety from NAD+ to the target molecule. Its presence suggests a role for the protein in ADP ribosylation. Up-regulated by NaCl. SRO5 and P5CDH (an overlapping gene in the anti…	10.4831	10.7779	38.8542	81.0084	101.125	111.43	66.7178	150.123	247431_at	A	A	P	P	P	P	P	P	10.6305	59.9313	106.278	108.42	5.63767	9.99744	10.199	1.02016	1.80908	1	1	1
247432_at	At5g62500	encodes a homolog of animal microtubule-end-binding protein. There are two other members of this family. EB1 forms foci at regions where the minus ends of microtubules are gathered during mitosis and early cytokinesis.	9.18959	8.87656	8.81524	9.18959	8.75435	8.81524	9.18959	9.31787	247432_at	P	P	P	A	A	P	P	P	9.03307	9.00241	8.7848	9.25373	0.996606	0.972515	1.02443	1.05338	1.02792
247437_at	At5g62490	Part of the AtHVA22 family. Protein expression is ABA- and stress-inducible.	11.3924	8.33973	12.9063	11.5514	10.8528	9.98664	12.3805	9.84916	247437_at	A	A	A	A	A	A	A	A	9.86606	12.2289	10.4197	11.1148	1.23949	1.05612	1.12657	1.06671	0.908903
247435_at	At5g62480	Encodes glutathione transferase belonging to the tau class of GSTs. Naming convention according to Wagner et al. (2002).	18.507	20.393	23.9176	22.9433	33.8246	26.7228	22.0087	27.0958	247435_at	P	P	P	P	P	P	A	P	19.45	23.4304	30.2737	24.5523	1.20465	1.55649	1.26233	0.81101	1.04788
247455_at	At5g62470	Encodes a R2R3 type Myb transcription factor whose expression is strongly induced by abscisic acid. Mediates abscisic acid signaling during drought stress response.	12.2101	13.3614	16.4498	16.6795	29.446	29.6508	18.7654	23.2636	247455_at	P	P	P	P	P	P	P	P	12.7857	16.5646	29.5484	21.0145	1.29556	2.31104	1.64359	0.711187	1.26863		1
247438_at	At5g62460	RING/FYVE/PHD zinc finger superfamily protein; FUNCTIONS IN: zinc ion binding; EXPRESSED IN: 23 plant structures; EXPRESSED DURING: 15 growth stages; CONTAINS InterPro DOMAIN/s: Protein of unknown function DUF3675 (InterPro:IPR022143), Zinc finger, C3HC4 RING-type (InterPro:IPR018957), Zinc finger, RING-CH-type (InterPro:IPR011016); BEST Arabidopsis thaliana protein match is: RING/FYVE/PHD zinc f…	61.3929	56.1028	53.0765	51.6251	56.1028	76.6386	64	66.257	247438_at	P	P	P	P	P	P	P	P	58.7478	52.3508	66.3707	65.1285	0.89111	1.12976	1.10861	0.981284	1.24408
247454_at	At5g62450	unknown protein	91.1392	62.6829	81.0084	70.0348	32.8996	71.0124	86.2229	81.0084	247454_at	P	P	P	P	P	P	P	P	76.9111	75.5216	51.956	83.6157	0.981934	0.675534	1.08717	1.60935	1.10718
247453_at	At5g62440	Encodes a protein DOMINO1 that belongs to a plant-specific gene family sharing a common motif present in the tomato DEFECTIVE CHLOROPLASTS AND LEAVES (LeDCL) protein. DOMINO1 is located in the nucleus. Arabidopsis embryos carrying the domino1 mutation grow slowly in comparison with wild type embryos and reach only the globular stage at desiccation. The primary defect of the mutation at the cellul…	39.6706	35.0174	45.5696	39.1245	30.4844	31.5594	53.0765	33.3589	247453_at	P	P	P	P	P	P	P	P	37.344	42.347	31.0219	43.2177	1.13397	0.830707	1.15729	1.39313	1.02056
247452_at	At5g62430	Dof-type zinc finger domain-containing protein, similar to H-protein promoter binding factor-2a GI:3386546 from (Arabidopsis thaliana). Represses expression of Constans (CO), a circadian regulator of flowering time. Interacts with LKP2 and FKF1. Expression oscillates under constant light conditions. Mainly expressed in the vasculature of cotyledons, leaves and hypocotyls, but also in stomata. Loc…	126.238	171.255	109.137	128.89	141.044	173.645	110.661	128.89	247452_at	P	P	P	P	P	P	P	P	148.746	119.014	157.345	119.776	0.800113	1.05781	0.805234	0.761231	1.0064
247483_at	At5g62420	NAD(P)-linked oxidoreductase superfamily protein; FUNCTIONS IN: oxidoreductase activity; INVOLVED IN: oxidation reduction; EXPRESSED IN: root; CONTAINS InterPro DOMAIN/s: Aldo/keto reductase (InterPro:IPR001395), Aldo/keto reductase subgroup (InterPro:IPR020471), Aldo/keto reductase, conserved site (InterPro:IPR018170); BEST Arabidopsis thaliana protein match is: NAD(P)-linked oxidoreductase supe…	8.9383	11.5514	9.12611	9.06307	8.1681	8.05564	7.83536	7.21	247483_at	P	A	A	A	A	A	P	A	10.2449	9.09459	8.11187	7.52268	0.887722	0.791799	0.734288	0.927367	0.82716
247482_at	At5g62410	SMC2-1 (SMC2)	12.8171	14.723	13.6422	13.6422	20.5348	13.1775	13.1775	12.295	247482_at	P	A	P	P	P	P	P	P	13.7701	13.6422	16.8561	12.7362	0.990712	1.22411	0.924922	0.755584	0.933593
247481_at	At5g62400	unknown protein; Has 7 Blast hits to 7 proteins in 2 species: Archae - 0; Bacteria - 0; Metazoa - 0; Fungi - 0; Plants - 7; Viruses - 0; Other Eukaryotes - 0 (source: NCBI BLink).	7.6211	8.63383	8.9383	8.45614	8.33973	8.1681	8.28212	8.33973	247481_at	A	A	A	A	A	A	A	A	8.12746	8.69722	8.25391	8.31092	1.0701	1.01556	1.02257	1.00691	0.955584
247480_at	At5g62390	A member of Arabidopsis BAG (Bcl-2-associated athanogene) proteins, plant homologs of mammalian regulators of apoptosis. Plant BAG proteins are multi-functional and remarkably similar to their animal counterparts, as they regulate apoptotic-like processes ranging from pathogen attack, to abiotic stress, to plant development. Localized to the ER. Necessary for the proper maintenance of the unfolde…	173.645	141.044	250.732	176.069	91.7731	164.279	212.306	213.783	247480_at	P	P	P	P	P	P	P	P	157.345	213.4	128.026	213.044	1.35626	0.813665	1.354	1.66407	0.99833
247479_at	At5g62380	Encodes a NAC-domain transcription factor involved in xylem formation. Induces transdifferentiation of various cells into metaxylem vessel elements. Located in the nucleus. Expression induced in the presence of auxin, cytokinin and brassinosteroids.	5.93809	6.58873	7.06162	6.9163	7.4127	6.72717	7.6211	7.1602	247479_at	A	A	P	A	P	A	A	A	6.26341	6.98896	7.06994	7.39065	1.11584	1.12877	1.17997	1.04536	1.05748
247478_at	At5g62360	Plant invertase/pectin methylesterase inhibitor superfamily protein; FUNCTIONS IN: enzyme inhibitor activity, pectinesterase inhibitor activity, pectinesterase activity; INVOLVED IN: biological_process unknown; LOCATED IN: cellular_component unknown; EXPRESSED IN: 22 plant structures; EXPRESSED DURING: 13 growth stages; CONTAINS InterPro DOMAIN/s: Pectinesterase inhibitor (InterPro:IPR006501); BE…	282.088	97.6806	265.028	119.428	139.102	131.599	288.015	168.897	247478_at	P	P	P	P	P	P	P	P	189.884	192.228	135.35	228.456	1.01234	0.712805	1.20313	1.68789	1.18846
247450_at	At5g62350	Plant invertase/pectin methylesterase inhibitor superfamily protein; FUNCTIONS IN: enzyme inhibitor activity, pectinesterase inhibitor activity, pectinesterase activity; INVOLVED IN: response to salt stress; LOCATED IN: endomembrane system; EXPRESSED IN: 22 plant structures; EXPRESSED DURING: 13 growth stages; CONTAINS InterPro DOMAIN/s: Pectinesterase inhibitor (InterPro:IPR006501); BEST Arabido…	508.463	357.054	484.382	380.038	340.144	354.588	455.087	354.588	247450_at	P	P	P	P	P	P	P	P	432.759	432.21	347.366	404.838	0.998731	0.802677	0.935481	1.16545	0.93667
247477_at	At5g62340	Plant invertase/pectin methylesterase inhibitor superfamily protein; FUNCTIONS IN: enzyme inhibitor activity, pectinesterase inhibitor activity, pectinesterase activity; INVOLVED IN: biological_process unknown; LOCATED IN: endomembrane system; EXPRESSED IN: hypocotyl, root; CONTAINS InterPro DOMAIN/s: Pectinesterase inhibitor (InterPro:IPR006501); BEST Arabidopsis thaliana protein match is: Plant…	9.51366	9.71356	9.44794	9.00047	9.12611	9.38268	8.57419	9.98664	247477_at	A	A	A	A	A	A	A	A	9.61361	9.2242	9.25439	9.28042	0.959495	0.962635	0.965342	1.00281	1.00609
247476_at	At5g62330	BEST Arabidopsis thaliana protein match is: Plant invertase/pectin methylesterase inhibitor superfamily protein (TAIR:AT5G62340.1); Has 9 Blast hits to 9 proteins in 2 species: Archae - 0; Bacteria - 0; Metazoa - 0; Fungi - 0; Plants - 9; Viruses - 0; Other Eukaryotes - 0 (source: NCBI BLink).	11.4716	11.6318	11.3924	13.1775	9.84916	11.2356	10.9283	11.6318	247476_at	A	A	A	A	A	A	A	A	11.5517	12.2849	10.5424	11.2801	1.06347	0.912623	0.976483	1.06997	0.918202
247451_at	At5g62320	Encodes a putative transcription factor (MYB99).	9.51366	10.2674	9.18959	11.5514	10.1965	9.91766	11.5514	10.6295	247451_at	A	A	A	A	A	A	P	A	9.89053	10.3705	10.0571	11.0905	1.04853	1.01684	1.12132	1.10275	1.06942
247475_at	At5g62310	Encodes a protein with a serine/threonine kinase domain. There are two other closely related members in Arabidopsis. Knock-out mutation results in incomplete root hair elongation. Expression is found all organs examined but is especially strong in elongating root hairs.	5.9794	7.06162	5.81589	6.63456	6.58873	5.89708	6.72717	5.73582	247475_at	P	P	P	A	P	A	P	A	6.52051	6.22522	6.2429	6.2315	0.954714	0.957425	0.955676	0.998173	1.00101
247449_at	At5g62290	nucleotide-sensitive chloride conductance regulator (ICln) family protein; FUNCTIONS IN: ion channel activity; INVOLVED IN: cell volume homeostasis, chloride transport; LOCATED IN: cellular_component unknown; EXPRESSED IN: 22 plant structures; EXPRESSED DURING: 13 growth stages; CONTAINS InterPro DOMAIN/s: Nucleotide-sensitive chloride conductance regulator (InterPro:IPR003521); Has 295 Blast hit…	75.5835	62.6829	70.5219	54.9482	90.5097	61.8199	94.3532	65.3448	247449_at	P	P	P	P	P	P	P	P	69.1332	62.7351	76.1648	79.849	0.907452	1.10171	1.155	1.04837	1.2728
247474_at	At5g62280	Protein of unknown function (DUF1442); CONTAINS InterPro DOMAIN/s: Protein of unknown function DUF1442 (InterPro:IPR009902); BEST Arabidopsis thaliana protein match is: Protein of unknown function (DUF1442) (TAIR:AT2G45360.1); Has 92 Blast hits to 92 proteins in 12 species: Archae - 0; Bacteria - 0; Metazoa - 0; Fungi - 0; Plants - 92; Viruses - 0; Other Eukaryotes - 0 (source: NCBI BLink).	9.44794	8.63383	8.9383	10.4831	8.33973	9.25351	8.81524	8.11168	247474_at	A	A	A	A	A	A	A	A	9.04088	9.71072	8.79662	8.46346	1.07409	0.972982	0.936132	0.962127	0.871558
247473_at	At5g62260	AT hook motif DNA-binding family protein; FUNCTIONS IN: DNA binding; INVOLVED IN: regulation of transcription, DNA-dependent; LOCATED IN: nucleus; EXPRESSED IN: 11 plant structures; EXPRESSED DURING: 7 growth stages; CONTAINS InterPro DOMAIN/s: Protein of unknown function DUF296 (InterPro:IPR005175), AT hook, DNA-binding motif (InterPro:IPR017956); BEST Arabidopsis thaliana protein match is: AT h…	14.5203	14.5203	14.3204	12.7286	15.0324	14.42	12.2101	13.9288	247473_at	P	A	A	A	A	A	A	P	14.5203	13.5245	14.7262	13.0694	0.931419	1.01418	0.90008	0.887497	0.966354
247472_at	At5g62250	microtubule-associated protein 65-9 (MAP65-9); CONTAINS InterPro DOMAIN/s: Microtubule-associated protein, MAP65/ASE1-type (InterPro:IPR007145); BEST Arabidopsis thaliana protein match is: Microtubule associated protein (MAP65/ASE1) family protein (TAIR:AT5G51600.1); Has 14792 Blast hits to 10558 proteins in 786 species: Archae - 349; Bacteria - 1217; Metazoa - 7703; Fungi - 921; Plants - 837; Vi…	7.26015	6.86852	7.21	6.86852	6.32033	6.9163	5.81589	6.10504	247472_at	A	A	A	A	A	A	A	A	7.06434	7.03926	6.61831	5.96046	0.996451	0.936863	0.84374	0.900601	0.846745
247471_at	At5g62230	Encodes a receptor-like kinase that, together with ER and ERL2 governs the initial decision of protodermal cells to either divide proliferatively to produce pavement cells or divide asymmetrically to generate stomatal complexes. It is important for maintaining stomatal stem cell activity and preventing terminal differentiation of the meristemoid into the guard mother cell. Along with erl2 functio…	10.2674	8.33973	10.1261	8.63383	10.4831	10.6295	8.39773	9.44794	247471_at	P	A	P	P	P	P	A	P	9.30357	9.37994	10.5563	8.92284	1.00821	1.13465	0.959077	0.84526	0.951268
247470_at	At5g62220	glycosyltransferase 18 (GT18); FUNCTIONS IN: catalytic activity; LOCATED IN: chloroplast, membrane; EXPRESSED IN: 23 plant structures; EXPRESSED DURING: 13 growth stages; CONTAINS InterPro DOMAIN/s: Exostosin-like (InterPro:IPR004263); BEST Arabidopsis thaliana protein match is: Exostosin family protein (TAIR:AT2G20370.1); Has 691 Blast hits to 690 proteins in 30 species: Archae - 0; Bacteria - 0…	75.5835	95.6704	66.257	68.5935	52.7098	89.8845	84.4485	121.095	247470_at	P	P	P	P	P	P	P	P	85.6269	67.4252	71.2971	102.772	0.78743	0.832649	1.20023	1.44146	1.52424
247463_at	At5g62210	Embryo-specific protein 3, (ATS3); CONTAINS InterPro DOMAIN/s: Lipase/lipooxygenase, PLAT/LH2 (InterPro:IPR008976), Embryo-specific 3 (InterPro:IPR010417); BEST Arabidopsis thaliana protein match is: seed gene 3 (TAIR:AT5G07190.1); Has 13635 Blast hits to 5538 proteins in 466 species: Archae - 12; Bacteria - 1109; Metazoa - 3835; Fungi - 1100; Plants - 4139; Viruses - 1069; Other Eukaryotes - 237…	9.84916	9.57983	8.81524	9.31787	8.11168	8.9383	9.18959	10.2674	247463_at	A	A	A	A	A	A	A	A	9.71449	9.06655	8.52499	9.7285	0.933302	0.877553	1.00144	1.14117	1.07301
247459_at	At5g62200	Embryo-specific protein 3, (ATS3); FUNCTIONS IN: molecular_function unknown; INVOLVED IN: biological_process unknown; LOCATED IN: plasma membrane, anchored to membrane; EXPRESSED IN: 24 plant structures; EXPRESSED DURING: 13 growth stages; CONTAINS InterPro DOMAIN/s: Lipase/lipooxygenase, PLAT/LH2 (InterPro:IPR008976), Embryo-specific 3 (InterPro:IPR010417); BEST Arabidopsis thaliana protein matc…	209.383	173.645	274.374	173.645	249	207.937	259.574	190.019	247459_at	P	P	P	P	P	P	P	P	191.514	224.01	228.468	224.796	1.16968	1.19296	1.17378	0.983929	1.00351
247465_at	At5g62190	DEAD/DEAH box RNA helicase PRH75	276.282	219.793	377.413	240.518	195.361	218.275	330.842	242.191	247465_at	P	P	P	P	P	P	P	P	248.038	308.965	206.818	286.517	1.24564	0.833817	1.15513	1.38536	0.927342
247458_at	At5g62180	carboxyesterase 20 (CXE20); INVOLVED IN: metabolic process; LOCATED IN: cellular_component unknown; EXPRESSED IN: root, flower; EXPRESSED DURING: petal differentiation and expansion stage; CONTAINS InterPro DOMAIN/s: Alpha/beta hydrolase fold-3 (InterPro:IPR013094); BEST Arabidopsis thaliana protein match is: alpha/beta-Hydrolases superfamily protein (TAIR:AT2G45600.1); Has 9350 Blast hits to 933…	24.2515	20.393	21.259	24.59	14.1232	21.8566	17.7531	24.4201	247458_at	P	A	A	A	A	A	A	A	22.3222	22.9245	17.9899	21.0866	1.02698	0.805921	0.944648	1.17213	0.91983
247457_at	At5g62170	unknown protein; BEST Arabidopsis thaliana protein match is: unknown protein (TAIR:AT5G51850.1); Has 381 Blast hits to 359 proteins in 81 species: Archae - 0; Bacteria - 16; Metazoa - 101; Fungi - 21; Plants - 99; Viruses - 3; Other Eukaryotes - 141 (source: NCBI BLink).	12.996	14.3204	12.4666	9.91766	11.7127	12.1257	11.7942	12.042	247457_at	P	P	A	A	A	A	P	A	13.6582	11.1921	11.9192	11.9181	0.819444	0.872677	0.872593	0.999904	1.06486
247469_at	At5g62165	Encodes a MADS box transcription factor. Expressed in quiescent center.	109.137	115.36	83.2859	116.162	134.364	105.42	102.537	76.6386	247469_at	P	P	P	P	P	P	P	P	112.249	99.7242	119.892	89.5878	0.888422	1.06809	0.798119	0.747239	0.898356
247456_at	At5g62160	member of Fe(II) transporter isolog family	12.5533	13.4543	13.1775	11.9588	11.3924	13.0864	13.0864	12.6407	247456_at	P	P	P	A	M	P	P	P	13.0038	12.5681	12.2394	12.8635	0.966493	0.941215	0.989211	1.05099	1.02351
247487_at	At5g62150	peptidoglycan-binding LysM domain-containing protein; FUNCTIONS IN: molecular_function unknown; INVOLVED IN: cell wall macromolecule catabolic process; LOCATED IN: endomembrane system; EXPRESSED IN: 15 plant structures; EXPRESSED DURING: 6 growth stages; BEST Arabidopsis thaliana protein match is: peptidoglycan-binding LysM domain-containing protein (TAIR:AT4G25433.1); Has 63 Blast hits to 63 pro…	192.672	225.972	155.417	186.108	171.255	170.072	186.108	177.294	247487_at	P	P	P	P	P	P	P	P	209.322	170.763	170.663	181.701	0.81579	0.815315	0.868048	1.06468	1.06406
247486_at	At5g62140	unknown protein; FUNCTIONS IN: molecular_function unknown; INVOLVED IN: biological_process unknown; LOCATED IN: chloroplast; EXPRESSED IN: 19 plant structures; EXPRESSED DURING: 13 growth stages; Has 60 Blast hits to 60 proteins in 24 species: Archae - 0; Bacteria - 14; Metazoa - 0; Fungi - 0; Plants - 45; Viruses - 0; Other Eukaryotes - 1 (source: NCBI BLink).	49.8665	74.028	31.779	39.9466	37.2715	58.4852	37.7918	42.2243	247486_at	P	P	P	P	P	P	P	P	61.9473	35.8628	47.8783	40.008	0.578924	0.772888	0.64584	0.835618	1.11559
247467_at	At5g62130	Per1-like family protein; FUNCTIONS IN: molecular_function unknown; INVOLVED IN: biological_process unknown; LOCATED IN: endomembrane system; EXPRESSED IN: 22 plant structures; EXPRESSED DURING: 13 growth stages; CONTAINS InterPro DOMAIN/s: Per1-like (InterPro:IPR007217); BEST Arabidopsis thaliana protein match is: Per1-like family protein (TAIR:AT1G16560.3).	116.162	186.108	70.5219	105.42	135.298	144.007	73.0089	95.0095	247467_at	P	P	P	P	P	P	P	P	151.135	87.9708	139.653	84.0092	0.582066	0.924025	0.555854	0.601557	0.954967
247485_at	At5g62120	member of Response Regulator: B- Type	7.3615	7.21	6.6807	7.01285	6.54322	7.01285	6.72717	7.6211	247485_at	A	A	A	A	A	A	A	A	7.28575	6.84677	6.77803	7.17414	0.939748	0.930313	0.98468	1.05844	1.04781
247484_at	At5g62110	Homeodomain-like superfamily protein; FUNCTIONS IN: DNA binding; INVOLVED IN: regulation of transcription; LOCATED IN: cellular_component unknown; CONTAINS InterPro DOMAIN/s: Homeodomain-related (InterPro:IPR012287); Has 30201 Blast hits to 17322 proteins in 780 species: Archae - 12; Bacteria - 1396; Metazoa - 17338; Fungi - 3422; Plants - 5037; Viruses - 0; Other Eukaryotes - 2996 (source: NCBI …	4.95883	5.06303	5.31474	4.99332	5.1337	5.38893	4.82323	5.02805	247484_at	P	A	A	A	A	P	A	A	5.01093	5.15403	5.26132	4.92564	1.02856	1.04997	0.98298	0.936199	0.955687
247461_at	At5g62100	A member of Arabidopsis BAG (Bcl-2-associated athanogene) proteins, plant homologs of mammalian regulators of apoptosis. Plant BAG proteins are multi-functional and remarkably similar to their animal counterparts, as they regulate apoptotic-like processes ranging from pathogen attack, to abiotic stress, to plant development.	10.1965	13.3614	10.0561	13.0864	12.042	13.2691	9.64646	11.7127	247461_at	A	A	A	A	A	P	A	A	11.7789	11.5713	12.6555	10.6796	0.982369	1.07442	0.906666	0.843865	0.922939
247466_at	At5g62090	SEUSS-like 2 (SLK2); BEST Arabidopsis thaliana protein match is: SEUSS-like 1 (TAIR:AT4G25520.1); Has 38958 Blast hits to 16422 proteins in 905 species: Archae - 6; Bacteria - 1880; Metazoa - 14538; Fungi - 4050; Plants - 2632; Viruses - 363; Other Eukaryotes - 15489 (source: NCBI BLink).	74.5429	77.7085	78.249	70.5219	72.0037	78.249	74.028	81.0084	247466_at	P	P	P	P	P	P	P	P	76.1257	74.3855	75.1264	77.5182	0.97714	0.986872	1.01829	1.03184	1.04212
247462_at	At5g62080	Bifunctional inhibitor/lipid-transfer protein/seed storage 2S albumin superfamily protein; FUNCTIONS IN: lipid binding; INVOLVED IN: lipid transport; LOCATED IN: endomembrane system; EXPRESSED IN: 8 plant structures; EXPRESSED DURING: petal differentiation and expansion stage, E expanded cotyledon stage, D bilateral stage; CONTAINS InterPro DOMAIN/s: Bifunctional inhibitor/plant lipid transfer pr…	7.31065	7.67411	8.1681	12.7286	7.06162	7.88986	6.72717	7.6211	247462_at	A	P	A	P	P	A	A	A	7.49238	10.4483	7.47574	7.17414	1.39453	0.997779	0.957524	0.959655	0.686629
247464_at	At5g62070	IQ-domain 23 (IQD23); CONTAINS InterPro DOMAIN/s: IQ calmodulin-binding region (InterPro:IPR000048); BEST Arabidopsis thaliana protein match is: IQ-domain 24 (TAIR:AT5G07240.1); Has 854 Blast hits to 833 proteins in 54 species: Archae - 0; Bacteria - 0; Metazoa - 62; Fungi - 7; Plants - 775; Viruses - 0; Other Eukaryotes - 10 (source: NCBI BLink).	18.8959	19.5622	17.3878	32.2226	12.4666	22.7848	24.4201	30.4844	247464_at	P	P	P	P	P	P	P	P	19.2291	24.8052	17.6257	27.4523	1.28998	0.916619	1.42765	1.55751	1.10672
247460_at	At5g62050	essential factor for protein sorting and assembly into membranes	147.033	157.586	183.546	158.683	183.546	163.144	188.706	171.255	247460_at	P	P	P	P	P	P	P	P	152.31	171.114	173.345	179.981	1.12346	1.13811	1.18167	1.03828	1.05181
247511_at	At5g62040	PEBP (phosphatidylethanolamine-binding protein) family protein; CONTAINS InterPro DOMAIN/s: Phosphatidylethanolamine-binding, conserved site (InterPro:IPR001858), Phosphatidylethanolamine-binding protein PEBP (InterPro:IPR008914); BEST Arabidopsis thaliana protein match is: PEBP (phosphatidylethanolamine-binding protein) family protein (TAIR:AT5G03840.1); Has 1807 Blast hits to 1807 proteins in 2…	18.507	15.5625	14.0257	13.5479	11.1579	15.455	14.5203	14.1232	247511_at	P	P	P	P	P	P	P	P	17.0347	13.7868	13.3065	14.3218	0.809335	0.781137	0.840739	1.0763	1.0388
247510_at	At5g62030	diphthamide synthesis DPH2 family protein; CONTAINS InterPro DOMAIN/s: Diphthamide synthesis, DHP1 (InterPro:IPR016435), Diphthamide synthesis, DPH1/DHP2 (InterPro:IPR002728); BEST Arabidopsis thaliana protein match is: diphthamide synthesis DPH2 family protein (TAIR:AT3G59630.1); Has 1807 Blast hits to 1807 proteins in 277 species: Archae - 0; Bacteria - 0; Metazoa - 736; Fungi - 347; Plants - 3…	17.6305	15.2422	16.5642	20.393	14.42	16.6795	17.1484	19.6983	247510_at	P	P	P	P	P	P	P	P	16.4363	18.4786	15.5497	18.4233	1.12425	0.946058	1.12089	1.1848	0.997009
247509_at	At5g62020	member of Heat Stress Transcription Factor (Hsf) family	81.5719	72.0037	103.968	95.0095	72.5046	117.784	118.603	121.938	247509_at	P	P	P	P	P	P	P	P	76.7878	99.4889	95.1443	120.27	1.29563	1.23905	1.56627	1.26408	1.20888
247468_at	At5g62010	ARF1-binding protein ; supported by cDNA: gi_2245393_gb_U89771.1_ATU89771	694.581	652.575	694.581	648.067	152.219	685.019	621.668	634.73	247468_at	P	P	P	P	P	P	P	P	673.578	671.324	418.619	628.199	0.996654	0.621485	0.93263	1.50065	0.935761
247508_at	At5g62000	Encodes an auxin response factor. Mutants have many defects including enlarged rosette leaves, reduced fertility, later senescence, hypocotyl elongation defects, enlarged seeds and enlarged cotyledons. May not mediate auxin effects. Increase in seed size due to increased cell proliferation.	215.269	187.403	162.017	148.056	17.8766	156.498	164.279	160.898	247508_at	P	P	P	P	P	P	P	P	201.336	155.036	87.1873	162.588	0.770038	0.433043	0.807545	1.86481	1.04871
247504_at	At5g61990	Pentatricopeptide repeat (PPR) superfamily protein; FUNCTIONS IN: molecular_function unknown; INVOLVED IN: biological_process unknown; LOCATED IN: mitochondrion; EXPRESSED IN: 12 plant structures; EXPRESSED DURING: 4 anthesis, F mature embryo stage, petal differentiation and expansion stage, E expanded cotyledon stage, D bilateral stage; CONTAINS InterPro DOMAIN/s: Pentatricopeptide repeat (Inter…	14.8254	14.42	14.5203	12.7286	12.042	13.737	13.737	14.1232	247504_at	P	P	P	A	P	P	P	P	14.6227	13.6244	12.8895	13.9301	0.931732	0.881472	0.952638	1.08074	1.02244
247503_at	At5g61980	A member of ARF GAP domain (AGD), A thaliana has 15 members, grouped into four classes. AGD1 belongs to the class 1, together with AGD2, AGD3 and AGD4. Not expressed in hypocotyls and cotyledons.	7.94474	7.72749	9.51366	8.22491	7.56846	8.9383	7.78124	8.1681	247503_at	A	A	A	A	A	A	A	P	7.83612	8.86928	8.25338	7.97467	1.13185	1.05325	1.01768	0.966231	0.899133
247505_at	At5g61970	signal recognition particle-related / SRP-related; INVOLVED IN: biological_process unknown; LOCATED IN: cellular_component unknown; EXPRESSED IN: 25 plant structures; EXPRESSED DURING: 15 growth stages; Has 30201 Blast hits to 17322 proteins in 780 species: Archae - 12; Bacteria - 1396; Metazoa - 17338; Fungi - 3422; Plants - 5037; Viruses - 0; Other Eukaryotes - 2996 (source: NCBI BLink).	116.97	126.238	128	101.829	151.167	117.784	133.436	103.968	247505_at	P	P	P	P	P	P	P	P	121.604	114.914	134.476	118.702	0.944987	1.10585	0.976134	0.882703	1.03296
247506_at	At5g61960	A member of mei2-like gene family, predominantly plant-based family of genes encoding RNA binding proteins with characteristic presence of a highly conserved RNA binding motif first described in the mei2 gene of the fission yeast S. pombe. In silico analyses reveal nine mei2 -like genes in A. thaliana. They were grouped into four distinct clades, based on overall sequence similarity and subfamily…	153.277	171.255	173.645	171.255	170.072	174.853	174.853	171.255	247506_at	P	P	P	P	P	P	P	P	162.266	172.45	172.462	173.054	1.06276	1.06284	1.06648	1.00343	1.0035
247502_at	At5g61940	Ubiquitin carboxyl-terminal hydrolase-related protein; FUNCTIONS IN: ubiquitin thiolesterase activity, zinc ion binding; INVOLVED IN: ubiquitin-dependent protein catabolic process; LOCATED IN: intracellular; EXPRESSED IN: 7 plant structures; EXPRESSED DURING: 4 anthesis, petal differentiation and expansion stage, E expanded cotyledon stage, D bilateral stage; CONTAINS InterPro DOMAIN/s: Protein o…	8.9383	8.9383	9.57983	10.0561	8.9383	9.57983	9.98664	9.44794	247502_at	P	A	A	P	A	A	P	A	8.9383	9.81797	9.25906	9.71729	1.09842	1.03589	1.08715	1.04949	0.989746
247507_at	At5g61930	ACCUMULATION OF PHOTOSYSTEM ONE 3	44.0173	42.2243	43.1115	38.5859	39.1245	40.5042	41.9326	40.5042	247507_at	A	P	P	A	M	A	P	A	43.1208	40.8487	39.8143	41.2184	0.947308	0.923321	0.955882	1.03526	1.00905
247501_at	At5g61920	unknown protein; INVOLVED IN: biological_process unknown; LOCATED IN: chloroplast; EXPRESSED IN: 6 plant structures; EXPRESSED DURING: 4 anthesis, F mature embryo stage, petal differentiation and expansion stage, E expanded cotyledon stage, D bilateral stage; BEST Arabidopsis thaliana protein match is: unknown protein (TAIR:AT1G67170.1); Has 1807 Blast hits to 1807 proteins in 277 species: Archae…	8.87656	8.69388	9.57983	8.39773	7.1602	8.39773	9.84916	9.06307	247501_at	A	P	P	A	A	A	A	A	8.78522	8.98878	7.77897	9.45611	1.02317	0.885461	1.07637	1.2156	1.05199
247500_at	At5g61910	DCD (Development and Cell Death) domain protein; CONTAINS InterPro DOMAIN/s: Development/cell death domain (InterPro:IPR013989), Kelch related (InterPro:IPR013089); BEST Arabidopsis thaliana protein match is: DCD (Development and Cell Death) domain protein (TAIR:AT2G32910.1); Has 30201 Blast hits to 17322 proteins in 780 species: Archae - 12; Bacteria - 1396; Metazoa - 17338; Fungi - 3422; Plants…	32.8996	38.8542	34.5353	29.6508	36.0019	33.8246	38.5859	34.2968	247500_at	P	P	P	P	P	P	P	P	35.8769	32.0931	34.9132	36.4413	0.894532	0.973138	1.01573	1.04377	1.13549
247493_at	At5g61900	Encodes a plasma-membrane localized, copine-like protein, which is a member of a newly identified class of calcium-dependent, phospholipid binding proteins that are present in a wide range of organisms. Mutants exhibit temperature-sensitive growth defects and increased hypersensitive response where permissive conditions are low temperature (22 degrees Celsius) and low humidity. Gene is expressed …	198.088	184.823	337.794	333.144	526.394	451.944	494.559	584.071	247493_at	P	P	P	P	P	P	P	P	191.456	335.469	489.169	539.315	1.7522	2.555	2.81692	1.10251	1.60765		1	1
247492_at	At5g61890	encodes a member of the ERF (ethylene response factor) subfamily B-4 of ERF/AP2 transcription factor family. The protein contains one AP2 domain. There are 7 members in this subfamily.	13.6422	13.1775	12.8171	12.4666	12.3805	13.2691	11.6318	12.1257	247492_at	P	P	A	P	A	A	A	A	13.4098	12.6419	12.8248	11.8788	0.942734	0.956376	0.885826	0.926232	0.939636
247491_at	At5g61880	Protein Transporter, Pam16; INVOLVED IN: biological_process unknown; LOCATED IN: endomembrane system; EXPRESSED IN: 18 plant structures; EXPRESSED DURING: 12 growth stages; CONTAINS InterPro DOMAIN/s: Protein Transporter, Pam16 (InterPro:IPR005341); BEST Arabidopsis thaliana protein match is: Protein Transporter, Pam16 (TAIR:AT3G59280.1); Has 384 Blast hits to 384 proteins in 161 species: Archae …	30.6965	31.3414	40.7859	37.2715	44.6318	36.2523	46.8507	35.0174	247491_at	P	P	P	P	P	P	P	P	31.019	39.0287	40.442	40.9341	1.25822	1.30378	1.31965	1.01217	1.04882
247499_at	At5g61865	unknown protein; Has 30201 Blast hits to 17322 proteins in 780 species: Archae - 12; Bacteria - 1396; Metazoa - 17338; Fungi - 3422; Plants - 5037; Viruses - 0; Other Eukaryotes - 2996 (source: NCBI BLink).	9.51366	7.78124	8.75435	7.67411	8.45614	8.1681	8.45614	6.54322	247499_at	A	P	A	A	P	A	P	A	8.64745	8.21423	8.31212	7.49968	0.949902	0.961222	0.867271	0.902258	0.913011
247490_at	At5g61850	Encodes transcriptional regulator that promotes the transition to flowering.Involved in floral meristem development. LFY is involved in the regulation of AP3 expression, and appears to bring the F-box protein UFO to the AP3 promoter.	8.9383	8.28212	7.88986	9.57983	8.57419	8.63383	8.28212	8.9383	247490_at	A	A	A	P	P	A	A	A	8.61021	8.73485	8.60401	8.61021	1.01448	0.99928	1	1.00072	0.985731
247496_at	At5g61840	GUT1; CONTAINS InterPro DOMAIN/s: Exostosin-like (InterPro:IPR004263); BEST Arabidopsis thaliana protein match is: Exostosin family protein (TAIR:AT1G27440.1); Has 30201 Blast hits to 17322 proteins in 780 species: Archae - 12; Bacteria - 1396; Metazoa - 17338; Fungi - 3422; Plants - 5037; Viruses - 0; Other Eukaryotes - 2996 (source: NCBI BLink).	145.009	157.586	148.056	149.086	146.018	157.586	152.219	183.546	247496_at	P	P	P	P	P	P	P	P	151.298	148.571	151.802	167.882	0.981977	1.00333	1.10962	1.10593	1.12998
247489_at	At5g61830	NAD(P)-binding Rossmann-fold superfamily protein; FUNCTIONS IN: oxidoreductase activity, binding, catalytic activity; INVOLVED IN: oxidation reduction, metabolic process; LOCATED IN: cellular_component unknown; EXPRESSED IN: 22 plant structures; EXPRESSED DURING: 13 growth stages; CONTAINS InterPro DOMAIN/s: NAD(P)-binding domain (InterPro:IPR016040), Glucose/ribitol dehydrogenase (InterPro:IPR00…	36.5044	38.0546	37.014	33.1285	54.9482	39.9466	38.8542	33.8246	247489_at	P	P	P	P	P	P	P	P	37.2795	35.0712	47.4474	36.3394	0.940764	1.27275	0.974782	0.765889	1.03616
247488_at	At5g61820	FUNCTIONS IN: molecular_function unknown; INVOLVED IN: biological_process unknown; LOCATED IN: vacuole; EXPRESSED IN: 24 plant structures; EXPRESSED DURING: 15 growth stages; CONTAINS InterPro DOMAIN/s: Stress up-regulated Nod 19 (InterPro:IPR011692); Has 30201 Blast hits to 17322 proteins in 780 species: Archae - 12; Bacteria - 1396; Metazoa - 17338; Fungi - 3422; Plants - 5037; Viruses - 0; Oth…	989.119	1152.06	929.3	910.175	1370.04	1160.07	1089.92	962.071	247488_at	P	P	P	P	P	P	P	P	1070.59	919.737	1265.06	1025.99	0.859094	1.18164	0.958344	0.811026	1.11553
247498_at	At5g61810	Mitochondrial substrate carrier family protein; FUNCTIONS IN: binding, calcium ion binding; INVOLVED IN: transport, transmembrane transport; LOCATED IN: mitochondrial inner membrane, membrane; EXPRESSED IN: 23 plant structures; EXPRESSED DURING: 14 growth stages; CONTAINS InterPro DOMAIN/s: EF-Hand 1, calcium-binding site (InterPro:IPR018247), Mitochondrial substrate carrier (InterPro:IPR001993),…	170.072	163.144	139.102	116.97	164.279	179.769	136.239	157.586	247498_at	P	P	P	P	P	P	P	P	166.608	128.036	172.024	146.913	0.768489	1.03251	0.881789	0.854027	1.14743
247518_at	At5g61800	Pentatricopeptide repeat (PPR) superfamily protein; CONTAINS InterPro DOMAIN/s: Pentatricopeptide repeat (InterPro:IPR002885); BEST Arabidopsis thaliana protein match is: Pentatricopeptide repeat (PPR-like) superfamily protein (TAIR:AT4G18840.1); Has 1807 Blast hits to 1807 proteins in 277 species: Archae - 0; Bacteria - 0; Metazoa - 736; Fungi - 347; Plants - 385; Viruses - 0; Other Eukaryotes -…	7.83536	8.28212	7.31065	8.51496	9.91766	7.88986	8.22491	7.88986	247518_at	P	P	A	A	A	M	P	M	8.05874	7.91281	8.90376	8.05739	0.981891	1.10486	0.999832	0.904942	1.01827
247494_at	At5g61790	calnexin 1 (CNX1); FUNCTIONS IN: unfolded protein binding, calcium ion binding; INVOLVED IN: protein folding; LOCATED IN: in 8 components; EXPRESSED IN: 26 plant structures; EXPRESSED DURING: 15 growth stages; CONTAINS InterPro DOMAIN/s: Calreticulin/calnexin, P (InterPro:IPR009033), Calreticulin/calnexin (InterPro:IPR001580), Calreticulin/calnexin, conserved site (InterPro:IPR018124), Concanaval…	261.379	256	302.334	278.204	128	240.518	312.996	286.026	247494_at	P	P	P	P	P	P	P	P	258.69	290.269	184.259	299.511	1.12208	0.712278	1.1578	1.62549	1.03184
247517_at	At5g61780	Involved in the regulation of AtGA20ox3 expression, as well as seed germination.	153.277	178.527	187.403	153.277	50.5626	192.672	203.657	186.108	247517_at	P	P	P	P	P	P	P	P	165.902	170.34	121.617	194.883	1.02675	0.733065	1.17469	1.60243	1.14408
247497_at	At5g61770	PETER PAN-like protein (PPAN); CONTAINS InterPro DOMAIN/s: Brix domain (InterPro:IPR007109); Has 1471 Blast hits to 1151 proteins in 223 species: Archae - 0; Bacteria - 34; Metazoa - 730; Fungi - 196; Plants - 73; Viruses - 37; Other Eukaryotes - 401 (source: NCBI BLink).	47.5048	46.2057	62.2499	49.8665	60.1295	44.9422	63.1189	50.9143	247497_at	P	P	P	P	P	P	P	P	46.8552	56.0582	52.5358	57.0166	1.19641	1.12124	1.21687	1.08529	1.0171
247495_at	At5g61760	Encodes an inositol polyphosphate 3-/6-/5-kinase that is localized to the nucleus. Able to complement a mutation in a yeast transcriptional regulator gene (ARG82/IPK2).	97.6806	92.4115	104.691	97.0059	147.033	100.427	117.784	96.3358	247495_at	P	P	P	P	P	P	P	P	95.046	100.849	123.73	107.06	1.06105	1.30179	1.1264	0.86527	1.06159
247516_at	At5g61750	RmlC-like cupins superfamily protein; FUNCTIONS IN: manganese ion binding, nutrient reservoir activity; INVOLVED IN: response to salt stress; LOCATED IN: endomembrane system, apoplast; EXPRESSED IN: inflorescence meristem, hypocotyl, flower; EXPRESSED DURING: petal differentiation and expansion stage; CONTAINS InterPro DOMAIN/s: Cupin, RmlC-type (InterPro:IPR011051), Cupin 1 (InterPro:IPR006045),…	14.723	14.1232	12.5533	15.455	11.0809	13.2691	12.3805	14.9285	247516_at	A	A	A	A	A	A	A	A	14.4231	14.0042	12.175	13.6545	0.970952	0.84413	0.94671	1.12152	0.975033
247515_at	At5g61740	member of ATH subfamily	7.31065	8.1681	7.01285	7.26015	9.64646	8.51496	8.63383	8.51496	247515_at	A	P	A	A	P	A	A	A	7.73937	7.1365	9.08071	8.57439	0.922103	1.17331	1.10789	0.944242	1.20148
247537_s_at	At5g61730	member of ATH subfamily	7.83536	8.39773	7.1602	8.05564	8.63383	7.56846	7.67411	8.69388	247537_s_at	A	P	A	P	P	A	P	P	8.11655	7.60792	8.10114	8.184	0.937335	0.998102	1.00831	1.01023	1.07572
247512_at	At5g61720	Protein of unknown function (DUF1216); FUNCTIONS IN: molecular_function unknown; INVOLVED IN: biological_process unknown; LOCATED IN: endomembrane system; EXPRESSED IN: 9 plant structures; EXPRESSED DURING: L mature pollen stage, M germinated pollen stage, 4 anthesis, C globular stage, petal differentiation and expansion stage; CONTAINS InterPro DOMAIN/s: Protein of unknown function DUF1216 (Inte…	21.7057	20.2521	21.7057	22.1618	16.9123	17.5087	16	15.7797	247512_at	A	A	A	P	A	A	A	A	20.9789	21.9337	17.2105	15.8899	1.04551	0.820372	0.757422	0.923266	0.724449
247539_at	At5g61710	unknown protein; BEST Arabidopsis thaliana protein match is: unknown protein (TAIR:AT4G02160.1); Has 1807 Blast hits to 1807 proteins in 277 species: Archae - 0; Bacteria - 0; Metazoa - 736; Fungi - 347; Plants - 385; Viruses - 0; Other Eukaryotes - 339 (source: NCBI BLink).	11.3137	9.51366	10.3388	11.8762	8.81524	9.25351	9.18959	9.25351	247539_at	A	A	A	A	A	A	A	A	10.4137	11.1075	9.03437	9.22155	1.06663	0.867548	0.885522	1.02072	0.830209
247538_at	At5g61700	member of ATH subfamily	10.4107	10.0561	10.1965	10.4831	10.4107	9.57983	9.31787	9.25351	247538_at	P	A	P	A	A	A	A	A	10.2334	10.3398	9.99528	9.28569	1.0104	0.976729	0.907388	0.929007	0.898051
247544_at	At5g61670	Encodes a close homolog of the Cauliflower OR (Orange) protein. The function of OR is to induce the differentiation of proplastids or other noncolored plastids into chromoplasts for carotenoid accumulation. Both proteins contain a Cysteine-rich zinc finger domain that is highly specific to DnaJ-like molecular chaperons.	280.139	317.365	263.197	306.555	357.054	306.555	242.191	261.379	247544_at	P	P	P	P	P	P	P	P	298.752	284.876	331.804	251.785	0.953552	1.11063	0.842789	0.758835	0.883841
247541_at	At5g61660	glycine-rich protein; FUNCTIONS IN: molecular_function unknown; INVOLVED IN: biological_process unknown; LOCATED IN: endomembrane system; EXPRESSED IN: 19 plant structures; EXPRESSED DURING: 9 growth stages; Has 30201 Blast hits to 17322 proteins in 780 species: Archae - 12; Bacteria - 1396; Metazoa - 17338; Fungi - 3422; Plants - 5037; Viruses - 0; Other Eukaryotes - 2996 (source: NCBI BLink).	147.033	184.823	227.544	163.144	75.5835	125.366	136.239	152.219	247541_at	P	P	P	P	P	P	P	P	165.928	195.344	100.475	144.229	1.17728	0.605531	0.869225	1.43548	0.738334
247536_at	At5g61650	The P-type cyclins (CYCPs) share a conserved central region of 100 amino acids ('cyclin box') displaying homology to the corresponding region of the PHO80 cyclin from Saccharomyces cerevisiae and the related G1 cyclins from Trypanosoma cruzi and T. brucei.	10.7779	10.4831	9.91766	10.7779	12.2101	13.8326	10.1261	11.0043	247536_at	P	A	A	A	P	A	A	A	10.6305	10.3478	13.0213	10.5652	0.973403	1.2249	0.993856	0.811376	1.02101
247514_at	At5g61640	ubiquitous enzyme that repairs oxidatively damaged proteins	221.322	225.972	190.019	163.144	74.028	209.383	187.403	165.421	247514_at	P	P	P	P	P	P	P	P	223.647	176.581	141.705	176.412	0.789555	0.633613	0.788798	1.24492	0.999041
247535_at	At5g61620	myb-like transcription factor family protein; CONTAINS InterPro DOMAIN/s: SANT, DNA-binding (InterPro:IPR001005), Homeodomain-like (InterPro:IPR009057), Myb, DNA-binding (InterPro:IPR014778), Zinc finger, CCHC-type (InterPro:IPR001878), HTH transcriptional regulator, Myb-type, DNA-binding (InterPro:IPR017930), Myb-like DNA-binding domain, SHAQKYF class (InterPro:IPR006447); BEST Arabidopsis thali…	9.64646	9.38268	11.9588	9.98664	9.31787	11.5514	7.46426	10.6295	247535_at	A	P	P	A	A	A	A	A	9.51457	10.9727	10.4347	9.04688	1.15325	1.0967	0.950844	0.867003	0.824488
247546_at	At5g61605	FUNCTIONS IN: molecular_function unknown; INVOLVED IN: biological_process unknown; LOCATED IN: endomembrane system; EXPRESSED IN: petal, leaf whorl, sepal, flower; EXPRESSED DURING: 4 anthesis, petal differentiation and expansion stage; BEST Arabidopsis thaliana protein match is: Maternally expressed gene (MEG) family protein (TAIR:AT2G16505.1); Has 30201 Blast hits to 17322 proteins in 780 speci…	10.9283	9.64646	10.2674	10.3388	10.2674	10.1965	10.1965	9.71356	247546_at	P	A	A	A	P	A	A	A	10.2874	10.3031	10.2319	9.95502	1.00153	0.99461	0.967691	0.972935	0.966215
247543_at	At5g61600	encodes a member of the ERF (ethylene response factor) subfamily B-3 of ERF/AP2 transcription factor family. The protein contains one AP2 domain. There are 18 members in this subfamily including ATERF-1, ATERF-2, AND ATERF-5.	178.527	97.0059	1144.1	576.03	430.539	1009.9	1488.87	1260.69	247543_at	P	P	P	P	P	P	P	P	137.767	860.066	720.221	1374.78	6.24292	5.22783	9.97906	1.90883	1.59846	1	1	1
247540_at	At5g61590	encodes a member of the ERF (ethylene response factor) subfamily B-3 of ERF/AP2 transcription factor family. The protein contains one AP2 domain. There are 18 members in this subfamily including ATERF-1, ATERF-2, AND ATERF-5.	1418.35	580.037	1652	639.145	430.539	596.344	1168.14	477.713	247540_at	P	P	P	P	P	P	P	P	999.194	1145.57	513.441	822.927	1.1465	0.513855	0.823591	1.60277	0.718354
247534_at	At5g61580	phosphofructokinase 4 (PFK4); CONTAINS InterPro DOMAIN/s: Pyrophosphate-dependent phosphofructokinase TP0108 (InterPro:IPR012004), Phosphofructokinase (InterPro:IPR000023); BEST Arabidopsis thaliana protein match is: phosphofructokinase 3 (TAIR:AT4G26270.1); Has 30201 Blast hits to 17322 proteins in 780 species: Archae - 12; Bacteria - 1396; Metazoa - 17338; Fungi - 3422; Plants - 5037; Viruses -…	209.383	183.546	156.498	183.546	259.574	166.572	192.672	168.897	247534_at	P	P	P	P	P	P	P	P	196.465	170.022	213.073	180.784	0.865408	1.08453	0.920188	0.848463	1.0633
247533_at	At5g61570	Protein kinase superfamily protein; FUNCTIONS IN: protein serine/threonine kinase activity, protein kinase activity, kinase activity, ATP binding; INVOLVED IN: protein amino acid phosphorylation; LOCATED IN: endomembrane system; EXPRESSED IN: 16 plant structures; EXPRESSED DURING: 12 growth stages; CONTAINS InterPro DOMAIN/s: Protein kinase, catalytic domain (InterPro:IPR000719), Serine/threonine…	13.8326	11.7942	11.7942	12.042	10.7034	13.3614	12.5533	13.2691	247533_at	A	A	A	A	A	A	P	A	12.8134	11.9181	12.0324	12.9112	0.930127	0.939051	1.00764	1.07304	1.08333
247532_at	At5g61560	U-box domain-containing protein kinase family protein; FUNCTIONS IN: ubiquitin-protein ligase activity, protein serine/threonine kinase activity, protein kinase activity, kinase activity, ATP binding; INVOLVED IN: protein amino acid phosphorylation, protein ubiquitination, response to stress; LOCATED IN: chloroplast, plasma membrane; EXPRESSED IN: 21 plant structures; EXPRESSED DURING: 13 growth …	35.7532	32.2226	42.8137	43.4113	67.6492	40.7859	50.5626	46.5271	247532_at	P	P	P	P	P	P	P	P	33.9879	43.1125	54.2175	48.5449	1.26847	1.5952	1.4283	0.895372	1.126
247531_at	At5g61550	U-box domain-containing protein kinase family protein; FUNCTIONS IN: ubiquitin-protein ligase activity, protein serine/threonine kinase activity, protein kinase activity, kinase activity, ATP binding; INVOLVED IN: protein amino acid phosphorylation, protein ubiquitination; LOCATED IN: ubiquitin ligase complex; CONTAINS InterPro DOMAIN/s: U box domain (InterPro:IPR003613), Serine/threonine-protein…	8.63383	8.57419	8.69388	7.6211	7.3615	8.51496	7.3615	7.78124	247531_at	A	A	A	A	A	P	A	A	8.60401	8.15749	7.93823	7.57137	0.948104	0.92262	0.879982	0.953786	0.928149
247530_at	At5g61540	N-terminal nucleophile aminohydrolases (Ntn hydrolases) superfamily protein; FUNCTIONS IN: asparaginase activity, hydrolase activity; INVOLVED IN: glycoprotein catabolic process; LOCATED IN: endomembrane system; EXPRESSED IN: 21 plant structures; EXPRESSED DURING: 13 growth stages; CONTAINS InterPro DOMAIN/s: Peptidase T2, asparaginase 2 (InterPro:IPR000246); BEST Arabidopsis thaliana protein mat…	34.2968	26.3549	28.2465	35.261	26.7228	31.5594	26.5382	25.8125	247530_at	P	P	P	P	P	P	P	P	30.3258	31.7537	29.1411	26.1754	1.04709	0.960934	0.863138	0.898228	0.824325
247545_at	At5g61530	small G protein family protein / RhoGAP family protein; FUNCTIONS IN: Rho GTPase activator activity; INVOLVED IN: signal transduction; LOCATED IN: intracellular; EXPRESSED IN: 24 plant structures; EXPRESSED DURING: 15 growth stages; CONTAINS InterPro DOMAIN/s: Rho GTPase activation protein (InterPro:IPR008936), RhoGAP (InterPro:IPR000198); Has 30201 Blast hits to 17322 proteins in 780 species: Ar…	560.278	526.394	625.992	533.742	670.921	544.958	588.134	576.03	247545_at	P	P	P	P	P	P	P	P	543.336	579.867	607.939	582.082	1.06723	1.1189	1.07131	0.957467	1.00382
247529_at	At5g61520	Major facilitator superfamily protein; FUNCTIONS IN: carbohydrate transmembrane transporter activity, sugar:hydrogen symporter activity; INVOLVED IN: transport, transmembrane transport; LOCATED IN: integral to membrane, membrane; EXPRESSED IN: 15 plant structures; EXPRESSED DURING: 8 growth stages; CONTAINS InterPro DOMAIN/s: Sugar transporter, conserved site (InterPro:IPR005829), Major facilitat…	182.278	139.102	256	165.421	137.187	134.364	213.783	172.446	247529_at	P	P	P	P	P	P	P	P	160.69	210.711	135.775	193.114	1.31128	0.844951	1.20178	1.42231	0.91649
247513_at	At5g61510	GroES-like zinc-binding alcohol dehydrogenase family protein; FUNCTIONS IN: oxidoreductase activity, binding, catalytic activity, zinc ion binding; INVOLVED IN: cell differentiation, response to high light intensity; EXPRESSED IN: 22 plant structures; EXPRESSED DURING: 14 growth stages; CONTAINS InterPro DOMAIN/s: GroES-like (InterPro:IPR011032), NAD(P)-binding domain (InterPro:IPR016040), Alcoho…	265.028	256	302.334	272.479	421.679	304.437	312.996	321.795	247513_at	P	P	P	P	P	P	P	P	260.514	287.406	363.058	317.396	1.10323	1.39362	1.21834	0.874229	1.10434
247542_at	At5g61500	ATG3; CONTAINS InterPro DOMAIN/s: Autophagy-related protein 3 (InterPro:IPR007135), Autophagy-related protein 3, C-terminal (InterPro:IPR019461), Autophagy-related protein 3, N-terminal (InterPro:IPR007134); Has 30201 Blast hits to 17322 proteins in 780 species: Archae - 12; Bacteria - 1396; Metazoa - 17338; Fungi - 3422; Plants - 5037; Viruses - 0; Other Eukaryotes - 2996 (source: NCBI BLink).	270.597	282.088	235.568	263.197	229.126	263.197	247.28	237.207	247542_at	P	P	P	P	P	P	P	P	276.342	249.383	246.162	242.243	0.902441	0.890786	0.876606	0.984081	0.971371
247527_at	At5g61480	PHLOEM INTERCALATED WITH XYLEM (PXY); FUNCTIONS IN: protein serine/threonine kinase activity, protein kinase activity, ATP binding; INVOLVED IN: protein amino acid phosphorylation; LOCATED IN: plasma membrane; EXPRESSED IN: 20 plant structures; EXPRESSED DURING: 13 growth stages; CONTAINS InterPro DOMAIN/s: Protein kinase, ATP binding site (InterPro:IPR017441), Protein kinase, catalytic domain (I…	85.6274	86.8227	104.691	88.647	78.249	87.4266	94.3532	92.4115	247527_at	P	P	P	P	P	P	P	P	86.225	96.6692	82.8378	93.3823	1.12113	0.960716	1.08301	1.12729	0.965999
247526_at	At5g61470	C2H2-like zinc finger protein; FUNCTIONS IN: sequence-specific DNA binding transcription factor activity, zinc ion binding, nucleic acid binding; INVOLVED IN: regulation of transcription; LOCATED IN: intracellular; CONTAINS InterPro DOMAIN/s: Zinc finger, C2H2-like (InterPro:IPR015880), Zinc finger, C2H2-type (InterPro:IPR007087); BEST Arabidopsis thaliana protein match is: C2H2-like zinc finger …	5.81589	5.73582	5.77572	6.27667	5.46416	6.1475	5.85634	6.32033	247526_at	P	P	P	P	A	A	A	A	5.77586	6.02619	5.80583	6.08834	1.04334	1.00519	1.0541	1.04866	1.01031
247528_at	At5g61460	Encodes SMC6B (STRUCTURAL MAINTENANCE OF CHROMOSOMES 6B), a component of the SMC5/6 complex. SMC5/6 complex promotes sister chromatid alignment and homologous recombination after DNA damage.	17.8766	16.5642	16.3362	16.9123	17.8766	17.7531	17.1484	18.507	247528_at	P	P	P	P	P	P	P	P	17.2204	16.6242	17.8149	17.8277	0.96538	1.03452	1.03526	1.00072	1.07239
247521_at	At5g61450	P-loop containing nucleoside triphosphate hydrolases superfamily protein; FUNCTIONS IN: molecular_function unknown; INVOLVED IN: biological_process unknown; LOCATED IN: chloroplast; EXPRESSED IN: 24 plant structures; EXPRESSED DURING: 12 growth stages; Has 1807 Blast hits to 1807 proteins in 277 species: Archae - 0; Bacteria - 0; Metazoa - 736; Fungi - 347; Plants - 385; Viruses - 0; Other Eukary…	109.896	101.125	115.36	99.7331	159.786	103.968	116.97	109.896	247521_at	P	P	P	P	P	P	P	P	105.511	107.547	131.877	113.433	1.01929	1.24989	1.07509	0.860143	1.05474
247524_at	At5g61440	Encodes a member of the thioredoxin family protein. Located in the chloroplast.	10.6295	10.4107	13.6422	11.2356	11.7127	9.78112	12.5533	10.4831	247524_at	A	A	P	A	P	A	P	A	10.5201	12.4389	10.7469	11.5182	1.18239	1.02156	1.09488	1.07177	0.925989
247519_at	At5g61430	NAC domain containing protein 100 (NAC100); FUNCTIONS IN: sequence-specific DNA binding transcription factor activity; INVOLVED IN: multicellular organismal development, regulation of transcription; LOCATED IN: cellular_component unknown; EXPRESSED IN: 9 plant structures; EXPRESSED DURING: LP.04 four leaves visible, 4 anthesis, petal differentiation and expansion stage; CONTAINS InterPro DOMAIN/s…	20.6776	21.1121	28.84	21.5557	35.5062	24.2515	21.1121	18.0009	247519_at	P	P	P	P	P	P	P	P	20.8949	25.1979	29.8788	19.5565	1.20594	1.42996	0.935948	0.654528	0.776118
247549_at	At5g61420	Encodes a putative transcription factor (MYB28).	335.461	418.766	372.217	268.727	398.932	259.574	259.574	207.937	247549_at	P	P	P	P	P	P	P	P	377.113	320.472	329.253	233.755	0.849804	0.873088	0.619854	0.709956	0.729408
247523_at	At5g61410	Arabidopsis thaliana ribulose-5-phosphate-3-epimerase mRNA	1341.84	1478.58	1217.75	1260.69	1052.79	1379.57	1067.48	1112.82	247523_at	P	P	P	P	P	P	P	P	1410.21	1239.22	1216.18	1090.15	0.878747	0.862407	0.77304	0.896374	0.879707
247548_at	At5g61400	Pentatricopeptide repeat (PPR) superfamily protein; CONTAINS InterPro DOMAIN/s: Pentatricopeptide repeat (InterPro:IPR002885); BEST Arabidopsis thaliana protein match is: Tetratricopeptide repeat (TPR)-like superfamily protein (TAIR:AT2G02150.1); Has 1807 Blast hits to 1807 proteins in 277 species: Archae - 0; Bacteria - 0; Metazoa - 736; Fungi - 347; Plants - 385; Viruses - 0; Other Eukaryotes -…	10.4107	10.3388	10.4831	9.84916	15.3482	11.0809	10.7779	11.0809	247548_at	A	A	A	A	P	A	A	A	10.3748	10.1662	13.2146	10.9294	0.979891	1.27372	1.05346	0.827071	1.07507
247525_at	At5g61380	Pseudo response regulator involved in the generation of circadian rhythms. TOC1 appears to shorten the period of circumnutation speed. TOC1 contributes to the plant fitness (carbon fixation, biomass) by influencing the circadian clock period. PRR3 may increase the stability of TOC1 by preventing interactions between TOC1 and the F-box protein ZTL. Expression of TOC1 is correlated with rhythmic ch…	203.657	72.5046	330.842	121.095	112.206	106.153	257.781	127.116	247525_at	P	P	P	P	P	P	P	P	138.081	225.969	109.179	192.448	1.6365	0.79069	1.39373	1.76268	0.851658
247550_at	At5g61370	Pentatricopeptide repeat (PPR) superfamily protein; FUNCTIONS IN: molecular_function unknown; INVOLVED IN: biological_process unknown; LOCATED IN: mitochondrion; EXPRESSED IN: 19 plant structures; EXPRESSED DURING: 8 growth stages; CONTAINS InterPro DOMAIN/s: Pentatricopeptide repeat (InterPro:IPR002885); BEST Arabidopsis thaliana protein match is: Pentatricopeptide repeat (PPR) superfamily prote…	37.014	25.6342	60.9688	33.3589	53.8174	25.1067	40.2244	27.0958	247550_at	P	P	P	P	P	P	P	P	31.3241	47.1639	39.462	33.6601	1.50567	1.2598	1.07458	0.852975	0.713685
247547_at	At5g61360	unknown protein; BEST Arabidopsis thaliana protein match is: unknown protein (TAIR:AT5G07730.1); Has 20 Blast hits to 20 proteins in 7 species: Archae - 0; Bacteria - 0; Metazoa - 0; Fungi - 0; Plants - 16; Viruses - 0; Other Eukaryotes - 4 (source: NCBI BLink).	37.014	27.8576	39.9466	34.0598	59.7141	31.779	34.7755	26.9087	247547_at	P	P	P	P	P	P	P	P	32.4358	37.0032	45.7465	30.8421	1.14081	1.41037	0.950865	0.674195	0.833498
247581_at	At5g61350	Protein kinase superfamily protein; FUNCTIONS IN: kinase activity; INVOLVED IN: protein amino acid phosphorylation; LOCATED IN: endomembrane system; EXPRESSED IN: male gametophyte, flower, cultured cell; EXPRESSED DURING: L mature pollen stage, M germinated pollen stage, 4 anthesis; CONTAINS InterPro DOMAIN/s: Malectin/receptor-like protein kinase (InterPro:IPR021720), Protein kinase, catalytic d…	7.72749	8.11168	7.51618	9.12611	7.21	7.51618	6.6807	8.81524	247581_at	A	A	A	A	A	A	A	A	7.91958	8.32115	7.36309	7.74797	1.05071	0.929732	0.978331	1.05227	0.931118
247522_at	At5g61340	unknown protein; BEST Arabidopsis thaliana protein match is: unknown protein (TAIR:AT1G26650.1); Has 30201 Blast hits to 17322 proteins in 780 species: Archae - 12; Bacteria - 1396; Metazoa - 17338; Fungi - 3422; Plants - 5037; Viruses - 0; Other Eukaryotes - 2996 (source: NCBI BLink).	190.019	256	103.25	159.786	146.018	144.007	132.514	209.383	247522_at	P	P	P	P	P	P	P	P	223.01	131.518	145.013	170.948	0.589743	0.650253	0.766552	1.17885	1.29981
247580_at	At5g61330	rRNA processing protein-related; FUNCTIONS IN: molecular_function unknown; INVOLVED IN: biological_process unknown; LOCATED IN: nucleus; EXPRESSED IN: 22 plant structures; EXPRESSED DURING: 13 growth stages; CONTAINS InterPro DOMAIN/s: TRAUB (InterPro:IPR012617); Has 35333 Blast hits to 34131 proteins in 2444 species: Archae - 798; Bacteria - 22429; Metazoa - 974; Fungi - 991; Plants - 531; Virus…	57.68	56.1028	60.5477	63.5579	97.6806	51.9842	68.1197	66.257	247580_at	P	P	P	P	P	P	P	P	56.8914	62.0528	74.8324	67.1883	1.09072	1.31535	1.18099	0.897851	1.08276
247579_at	At5g61320	member of CYP89A	8.33973	8.1681	8.63383	9.06307	8.63383	8.63383	8.63383	7.88986	247579_at	P	A	P	P	P	A	P	A	8.25391	8.84845	8.63383	8.26184	1.07203	1.04603	1.00096	0.956916	0.933705
247520_at	At5g61310	Cytochrome c oxidase subunit Vc family protein; FUNCTIONS IN: cytochrome-c oxidase activity; INVOLVED IN: oxidation reduction; LOCATED IN: mitochondrial respiratory chain, endomembrane system; EXPRESSED IN: 23 plant structures; EXPRESSED DURING: 13 growth stages; CONTAINS InterPro DOMAIN/s: Cytochrome c oxidase subunit Vc (InterPro:IPR008432); BEST Arabidopsis thaliana protein match is: Cytochrom…	115.36	108.383	116.97	116.97	126.238	106.891	128.89	118.603	247520_at	P	P	P	P	P	P	P	P	111.872	116.97	116.565	123.747	1.04558	1.04195	1.10615	1.06162	1.05793
247578_at	At5g61300	unknown protein; BEST Arabidopsis thaliana protein match is: unknown protein (TAIR:AT5G07790.2); Has 1807 Blast hits to 1807 proteins in 277 species: Archae - 0; Bacteria - 0; Metazoa - 736; Fungi - 347; Plants - 385; Viruses - 0; Other Eukaryotes - 339 (source: NCBI BLink).	17.0299	16.3362	18.8959	17.6305	22.1618	19.1597	20.6776	16.1113	247578_at	P	P	P	P	P	A	P	P	16.6831	18.2632	20.6607	18.3945	1.09471	1.23842	1.10258	0.890312	1.00719
247577_at	At5g61290	Flavin-binding monooxygenase family protein; FUNCTIONS IN: NADP or NADPH binding, monooxygenase activity, FAD binding, flavin-containing monooxygenase activity; INVOLVED IN: oxidation reduction; LOCATED IN: cellular_component unknown; EXPRESSED IN: 11 plant structures; EXPRESSED DURING: 4 anthesis, C globular stage; CONTAINS InterPro DOMAIN/s: Flavin-containing monooxygenase FMO (InterPro:IPR0009…	37.2715	40.5042	25.2813	24.59	37.5307	29.0406	28.6408	36.2523	247577_at	P	P	P	P	P	P	P	P	38.8878	24.9357	33.2857	32.4465	0.64122	0.85594	0.834362	0.97479	1.30121
247576_at	At5g61280	Remorin family protein; CONTAINS InterPro DOMAIN/s: Remorin, C-terminal (InterPro:IPR005516); BEST Arabidopsis thaliana protein match is: Remorin family protein (TAIR:AT1G13920.1); Has 1807 Blast hits to 1807 proteins in 277 species: Archae - 0; Bacteria - 0; Metazoa - 736; Fungi - 347; Plants - 385; Viruses - 0; Other Eukaryotes - 339 (source: NCBI BLink).	8.63383	8.33973	6.54322	8	8.11168	7.21	7.67411	9.12611	247576_at	P	P	A	A	P	A	A	A	8.48678	7.27161	7.66084	8.40011	0.856816	0.90268	0.989788	1.0965	1.15519
247568_at	At5g61260	Plant calmodulin-binding protein-related; CONTAINS InterPro DOMAIN/s: Calmodulin-binding protein, plant (InterPro:IPR012417); BEST Arabidopsis thaliana protein match is: Plant calmodulin-binding protein-related (TAIR:AT5G07820.1); Has 1807 Blast hits to 1807 proteins in 277 species: Archae - 0; Bacteria - 0; Metazoa - 736; Fungi - 347; Plants - 385; Viruses - 0; Other Eukaryotes - 339 (source: NC…	7.21	7.56846	7.31065	7.01285	7.21	6.77396	6.72717	7.21	247568_at	A	A	A	A	A	A	A	A	7.38923	7.16175	6.99198	6.96859	0.969214	0.946239	0.943073	0.996654	0.973029
247570_at	At5g61250	Belongs to the plant glycoside hydrolase family 79. Encodes a protein with several posttranslational modification sites including O-&#946;-GlcNAc attachment sites and serine-, threonine- and tyrosine-phosphorylation sites, suggesting that this protein is extensively modified posttranslationally. The protein is predicted (WoLF PSORT program) to be secreted.	59.3016	50.9143	56.1028	50.9143	71.5064	36.5044	47.1766	44.6318	247570_at	P	P	P	P	P	P	P	P	55.108	53.5086	54.0054	45.9042	0.970976	0.979992	0.832986	0.849993	0.857885
247569_at	At5g61240	Leucine-rich repeat (LRR) family protein; CONTAINS InterPro DOMAIN/s: Leucine-rich repeat, typical subtype (InterPro:IPR003591), Leucine-rich repeat-containing N-terminal domain, type 2 (InterPro:IPR013210), Leucine-rich repeat (InterPro:IPR001611); BEST Arabidopsis thaliana protein match is: Leucine-rich repeat (LRR) family protein (TAIR:AT1G13910.1).	150.123	188.706	116.97	136.239	182.278	159.786	147.033	151.167	247569_at	P	P	P	P	P	P	P	P	169.415	126.605	171.032	149.1	0.747308	1.00955	0.88009	0.871766	1.17768
247574_at	At5g61230	Encodes ANK6, a mitochondrial ankyrin repeat protein required for male-female gamete recognition.	196.72	218.275	184.823	148.056	249	199.466	195.361	192.672	247574_at	P	P	P	P	P	P	P	P	207.497	166.44	224.233	194.016	0.802129	1.08065	0.935031	0.865245	1.16569
247572_at	At5g61220	LYR family of Fe/S cluster biogenesis protein; CONTAINS InterPro DOMAIN/s: Complex 1 LYR protein (InterPro:IPR008011); Has 1807 Blast hits to 1807 proteins in 277 species: Archae - 0; Bacteria - 0; Metazoa - 736; Fungi - 347; Plants - 385; Viruses - 0; Other Eukaryotes - 339 (source: NCBI BLink).	80.4489	80.4489	79.3413	74.028	87.4266	92.4115	103.968	88.0347	247572_at	P	P	P	P	P	P	P	P	80.4489	76.6847	89.919	96.0015	0.95321	1.11772	1.19332	1.06764	1.2519
247571_at	At5g61210	membrane localized t-SNARE SNAP25 homologue, probably involved in cytokinesis and cell plate formation	352.139	321.795	430.539	439.586	580.037	484.382	439.586	564.175	247571_at	P	P	P	P	P	P	P	P	336.967	435.062	532.209	501.88	1.29111	1.57941	1.48941	0.943014	1.15358
247567_at	At5g61190	putative endonuclease or glycosyl hydrolase with C2H2-type zinc finger domain; FUNCTIONS IN: zinc ion binding, nucleic acid binding; LOCATED IN: chloroplast; EXPRESSED IN: 23 plant structures; EXPRESSED DURING: 13 growth stages; CONTAINS InterPro DOMAIN/s: Zinc finger, C2H2-like (InterPro:IPR015880), Zinc finger, U1-type (InterPro:IPR003604), Zinc finger, C2H2-type (InterPro:IPR007087); BEST Arab…	26.5382	24.2515	26.7228	30.6965	31.125	22.4711	29.446	24.761	247567_at	P	P	P	P	P	P	P	P	25.3948	28.7096	26.798	27.1035	1.13053	1.05526	1.06728	1.0114	0.944057
247566_at	At5g61170	Ribosomal protein S19e family protein; FUNCTIONS IN: structural constituent of ribosome; INVOLVED IN: translation; LOCATED IN: cytosolic small ribosomal subunit, cytosolic ribosome, ribosome, vacuole; EXPRESSED IN: 23 plant structures; EXPRESSED DURING: 13 growth stages; CONTAINS InterPro DOMAIN/s: Ribosomal protein S19e, conserved site (InterPro:IPR018277), Ribosomal protein S19e (InterPro:IPR00…	168.897	174.853	276.282	195.361	88.647	174.853	265.028	213.783	247566_at	P	P	P	P	P	P	P	P	171.875	235.822	131.75	239.405	1.37205	0.766546	1.3929	1.81712	1.0152
247573_at	At5g61160	anthocyanin 5-aromatic acyltransferase 1 (AACT1); FUNCTIONS IN: transferase activity, transferring acyl groups other than amino-acyl groups, transferase activity; INVOLVED IN: biological_process unknown; LOCATED IN: cellular_component unknown; EXPRESSED IN: stem, leaf; EXPRESSED DURING: LP.04 four leaves visible; CONTAINS InterPro DOMAIN/s: Transferase (InterPro:IPR003480); BEST Arabidopsis thali…	8.1681	8.39773	8.57419	10.5561	7.83536	7.31065	8.57419	9.64646	247573_at	A	A	A	A	A	A	A	A	8.28292	9.56513	7.57301	9.11033	1.1548	0.914292	1.09989	1.203	0.952452
247565_at	At5g61150	Encodes highly hydrophilic protein involved in positively regulating FLC expression. Mutants are early flowering and show a loss of FLC expression in the absence of cold.	83.2859	80.4489	76.1093	74.5429	66.257	64.8934	64.8934	81.5719	247565_at	P	P	P	P	P	P	P	P	81.8674	75.3261	65.5752	73.2326	0.920099	0.800993	0.894528	1.11677	0.972208
247564_at	At5g61140	Encodes a predicted protein with 30% identity with MER3/RCK.	125.366	128.89	132.514	120.259	206.5	121.095	112.986	126.238	247564_at	P	P	P	P	P	P	P	P	127.128	126.386	163.798	119.612	0.994166	1.28845	0.940877	0.730241	0.946398
247563_at	At5g61130	Encodes a plasmodesmatal localized protein with callose binding activity. The function of PDCB1 is unknown but overexpression leads to the hyperaccumulation of callose.	43.4113	39.3966	48.5029	45.8866	45.5696	44.6318	51.2685	44.6318	247563_at	P	P	P	P	P	P	P	P	41.404	47.1947	45.1007	47.9501	1.13986	1.08928	1.1581	1.06318	1.01601
247562_at	At5g61120	BEST Arabidopsis thaliana protein match is: Polynucleotidyl transferase, ribonuclease H-like superfamily protein (TAIR:AT5G61090.1); Has 125 Blast hits to 115 proteins in 16 species: Archae - 0; Bacteria - 0; Metazoa - 22; Fungi - 0; Plants - 102; Viruses - 0; Other Eukaryotes - 1 (source: NCBI BLink).	8.69388	7.51618	8.63383	9.98664	9.12611	9.51366	7.67411	8.51496	247562_at	P	A	A	A	P	P	P	P	8.10503	9.31024	9.31988	8.09454	1.1487	1.14989	0.998705	0.868523	0.869423
247561_at	At5g61110	zinc ion binding; FUNCTIONS IN: zinc ion binding; INVOLVED IN: biological_process unknown; LOCATED IN: cellular_component unknown; EXPRESSED IN: leaf whorl, sepal, flower; EXPRESSED DURING: petal differentiation and expansion stage; CONTAINS InterPro DOMAIN/s: Zinc finger, PHD-type (InterPro:IPR001965); BEST Arabidopsis thaliana protein match is: unknown protein (TAIR:AT5G61100.1); Has 78 Blast h…	6.23332	6.72717	6.6807	8	5.89708	5.77572	6.10504	6.32033	247561_at	A	A	A	A	A	A	A	A	6.48024	7.34035	5.8364	6.21268	1.13273	0.900645	0.958711	1.06447	0.846374
247560_at	At5g61090	Polynucleotidyl transferase, ribonuclease H-like superfamily protein; FUNCTIONS IN: nucleic acid binding; INVOLVED IN: biological_process unknown; LOCATED IN: chloroplast; EXPRESSED IN: 19 plant structures; EXPRESSED DURING: 11 growth stages; CONTAINS InterPro DOMAIN/s: Polynucleotidyl transferase, ribonuclease H fold (InterPro:IPR012337); BEST Arabidopsis thaliana protein match is: unknown prote…	6.6807	7.56846	7.1602	8.28212	6.6807	7.3615	6.23332	8.45614	247560_at	A	P	A	A	A	A	A	P	7.12458	7.72116	7.0211	7.34473	1.08374	0.985476	1.0309	1.04609	0.951247
247559_at	At5g61070	Encodes a protein with similarity to histone deacetylases, a class of chromatin remodeling factors which act on H3/H4 histones. Expressed in roots where it appears to regulate the expression of epidermal cell fate genes controlling hair cell differentiation.	11.8762	9.51366	9.71356	13.4543	9.18959	10.8528	8.51496	9.06307	247559_at	A	A	A	P	A	A	A	A	10.6949	11.584	10.0212	8.78902	1.08313	0.937006	0.821793	0.877041	0.758724
247558_at	At5g61060	Encodes a member of the histone deacetylase family.	94.3532	87.4266	106.891	99.0442	107.635	78.249	93.0542	76.1093	247558_at	P	P	P	P	P	P	P	P	90.8899	102.968	92.9419	84.5817	1.13288	1.02258	0.930596	0.91005	0.82144
247557_at	At5g61050	histone deacetylase-related / HD-related; CONTAINS InterPro DOMAIN/s: Histone deacetylase superfamily (InterPro:IPR000286); BEST Arabidopsis thaliana protein match is: histone deacetylase 5 (TAIR:AT5G61060.2); Has 1807 Blast hits to 1807 proteins in 277 species: Archae - 0; Bacteria - 0; Metazoa - 736; Fungi - 347; Plants - 385; Viruses - 0; Other Eukaryotes - 339 (source: NCBI BLink).	7.4127	8	5.77572	6.49802	6.72717	7.31065	6.54322	6.86852	247557_at	A	A	A	A	A	A	A	A	7.70635	6.13687	7.01891	6.70587	0.796339	0.910796	0.870174	0.9554	1.09272
247556_at	At5g61040	unknown protein; BEST Arabidopsis thaliana protein match is: unknown protein (TAIR:AT5G08010.1); Has 1807 Blast hits to 1807 proteins in 277 species: Archae - 0; Bacteria - 0; Metazoa - 736; Fungi - 347; Plants - 385; Viruses - 0; Other Eukaryotes - 339 (source: NCBI BLink).	22.7848	19.9733	18.8959	17.7531	20.5348	17.3878	19.4271	12.8171	247556_at	P	P	P	P	P	P	P	A	21.379	18.3245	18.9613	16.1221	0.857124	0.88691	0.754108	0.850265	0.879812
247575_at	At5g61030	encodes a glycine-rich RNA binding protein. Gene expression is induced by cold.	98.36	88.647	98.36	105.42	43.7133	76.6386	101.125	97.6806	247575_at	P	P	P	P	P	P	P	P	93.5035	101.89	60.176	99.4029	1.08969	0.643569	1.06309	1.65187	0.975592
247555_at	At5g61020	evolutionarily conserved C-terminal region 3 (ECT3); CONTAINS InterPro DOMAIN/s: YTH domain (InterPro:IPR007275); BEST Arabidopsis thaliana protein match is: evolutionarily conserved C-terminal region 2 (TAIR:AT3G13460.4); Has 1118 Blast hits to 1101 proteins in 185 species: Archae - 0; Bacteria - 4; Metazoa - 492; Fungi - 150; Plants - 353; Viruses - 0; Other Eukaryotes - 119 (source: NCBI BLink…	294.067	250.732	433.534	354.588	388.023	298.172	404.501	308.687	247555_at	P	P	P	P	P	P	P	P	272.399	394.061	343.098	356.594	1.44663	1.25954	1.30909	1.03934	0.904921
247554_at	At5g61010	A member of EXO70 gene family, putative exocyst subunits, conserved in land plants. Arabidopsis thaliana contains 23 putative EXO70 genes, which can be classified into eight clusters on the phylogenetic tree.	130.69	141.044	145.009	159.786	280.139	170.072	150.123	171.255	247554_at	P	P	P	P	P	P	P	P	135.867	152.398	225.105	160.689	1.12167	1.65681	1.18269	0.713838	1.0544
247606_at	At5g61000	RPA70D; FUNCTIONS IN: DNA binding, nucleic acid binding; INVOLVED IN: DNA replication; LOCATED IN: nucleus; EXPRESSED IN: 22 plant structures; EXPRESSED DURING: 13 growth stages; CONTAINS InterPro DOMAIN/s: Replication factor-a protein 1 Rpa1 (InterPro:IPR004591), Nucleic acid-binding, OB-fold-like (InterPro:IPR016027), Nucleic acid-binding, OB-fold (InterPro:IPR012340), Nucleic acid binding, OB-…	9.25351	9.51366	9.06307	11.0043	8.63383	8.81524	8.28212	8.75435	247606_at	A	P	A	A	A	A	P	P	9.38358	10.0337	8.72453	8.51823	1.06928	0.929766	0.907781	0.976354	0.848962
247608_at	At5g60990	DEA(D/H)-box RNA helicase family protein; FUNCTIONS IN: helicase activity, nucleic acid binding, ATP-dependent helicase activity, ATP binding; LOCATED IN: cellular_component unknown; EXPRESSED IN: 22 plant structures; EXPRESSED DURING: 13 growth stages; CONTAINS InterPro DOMAIN/s: RNA helicase, DEAD-box type, Q motif (InterPro:IPR014014), DNA/RNA helicase, DEAD/DEAH box type, N-terminal (InterPro…	114.563	104.691	115.36	109.137	70.5219	103.968	139.102	121.095	247608_at	P	P	P	P	P	P	P	P	109.627	112.249	87.2451	130.099	1.02391	0.795834	1.18674	1.49119	1.15902
247551_at	At5g60980	Nuclear transport factor 2 (NTF2) family protein with RNA binding (RRM-RBD-RNP motifs) domain; FUNCTIONS IN: RNA binding, nucleotide binding, nucleic acid binding; INVOLVED IN: transport, nucleocytoplasmic transport; LOCATED IN: intracellular; EXPRESSED IN: 23 plant structures; EXPRESSED DURING: 13 growth stages; CONTAINS InterPro DOMAIN/s: Nuclear transport factor 2 (InterPro:IPR002075), RNA rec…	77.1717	72.5046	77.1717	74.5429	47.1766	63.1189	76.6386	81.5719	247551_at	P	P	P	P	P	P	P	P	74.8381	75.8573	55.1478	79.1053	1.01362	0.736894	1.05702	1.43442	1.04282
247605_at	At5g60970	TCP gene involved in heterochronic control of leaf differentiation.	7.26015	8.05564	7.31065	8.9383	7.3615	7.06162	6.77396	7.78124	247605_at	A	P	P	P	A	A	A	A	7.6579	8.12447	7.21156	7.2776	1.06093	0.941716	0.950339	1.00916	0.895763
247607_at	At5g60960	Pentatricopeptide repeat (PPR) superfamily protein; FUNCTIONS IN: molecular_function unknown; INVOLVED IN: biological_process unknown; LOCATED IN: cellular_component unknown; EXPRESSED IN: 22 plant structures; EXPRESSED DURING: 13 growth stages; CONTAINS InterPro DOMAIN/s: Pentatricopeptide repeat (InterPro:IPR002885); BEST Arabidopsis thaliana protein match is: Pentatricopeptide repeat (PPR) sup…	27.8576	24.761	30.0647	26.1729	29.2426	22.4711	37.7918	27.0958	247607_at	P	P	P	P	P	P	P	P	26.3093	28.1188	25.8569	32.4438	1.06878	0.982802	1.23317	1.25475	1.15381
247604_at	At5g60950	COBRA-like protein 5 precursor (COBL5); INVOLVED IN: biological_process unknown; LOCATED IN: endomembrane system; EXPRESSED IN: 15 plant structures; EXPRESSED DURING: 12 growth stages; CONTAINS InterPro DOMAIN/s: Glycosyl-phosphatidyl inositol-anchored, plant (InterPro:IPR006918); BEST Arabidopsis thaliana protein match is: COBRA-like extracellular glycosyl-phosphatidyl inositol-anchored protein …	14.42	14.5203	21.5557	19.0273	20.8215	15.455	14.3204	12.3805	247604_at	A	A	A	A	P	A	A	A	14.4702	20.2915	18.1382	13.3505	1.4023	1.25349	0.92262	0.73604	0.657933
247609_at	At5g60940	Transducin/WD40 repeat-like superfamily protein; CONTAINS InterPro DOMAIN/s: WD40 repeat 2 (InterPro:IPR019782), WD40 repeat-like-containing domain (InterPro:IPR011046), WD40 repeat, conserved site (InterPro:IPR019775), WD40-repeat-containing domain (InterPro:IPR017986), WD40/YVTN repeat-like-containing domain (InterPro:IPR015943), WD40 repeat (InterPro:IPR001680), WD40 repeat, subgroup (InterPro…	41.9326	47.8352	38.5859	39.6706	60.9688	46.5271	45.2548	39.9466	247609_at	P	P	P	P	P	P	P	P	44.8839	39.1282	53.748	42.6007	0.871766	1.19749	0.949131	0.792601	1.08875
247603_at	At5g60930	P-loop containing nucleoside triphosphate hydrolases superfamily protein; FUNCTIONS IN: microtubule motor activity, ATP binding; INVOLVED IN: microtubule-based movement; EXPRESSED IN: 21 plant structures; EXPRESSED DURING: 14 growth stages; CONTAINS InterPro DOMAIN/s: Kinesin, motor region, conserved site (InterPro:IPR019821), Kinesin, motor domain (InterPro:IPR001752); BEST Arabidopsis thaliana …	11.4716	11.7127	11.3924	12.042	10.8528	11.3924	11.7942	12.295	247603_at	P	M	P	P	A	P	P	P	11.5922	11.7172	11.1226	12.0446	1.01079	0.959495	1.03903	1.08289	1.02794
247552_at	At5g60920	Encodes a glycosylphosphatidylinositol-anchored protein localized primarily in the plasma membrane of the longitudinal sides of root cells. Necessary for oriented cell expansion in Arabidopsis. Cob mutants have abnormal roots that expand radially rather than longitudinally under certain growth conditions.	576.03	675.588	442.643	481.036	754.826	504.951	471.136	541.193	247552_at	P	P	P	P	P	M	P	P	625.809	461.839	629.888	506.165	0.737988	1.00652	0.808817	0.803578	1.09598
247553_at	At5g60910	MADS box gene negatively regulated by APETALA1	508.463	504.951	407.315	433.534	404.501	467.882	393.44	421.679	247553_at	P	P	P	P	P	P	P	P	506.707	420.424	436.191	407.559	0.829718	0.860835	0.804329	0.934359	0.9694
247602_at	At5g60900	Encodes a receptor-like protein kinase.	48.1679	46.5271	55.7152	80.4489	55.3304	47.8352	36.0019	47.8352	247602_at	P	P	P	P	P	P	P	P	47.3475	68.082	51.5828	41.9185	1.43792	1.08945	0.885337	0.812646	0.615706
247600_at	At5g60890	Myb-like transcription factor that modulates expression of ASA1, a key point of control in the tryptophan pathway; mutant has deregulated expression of ASA1 in dominant allele. Loss of function allele suggests ATR1 also functions at a control point for regulating indole glucosinolate homeostasis.	10.1261	11.0809	9.18959	12.3805	8.45614	10.4107	8.28212	8.39773	247600_at	A	P	A	A	A	A	A	A	10.6035	10.7851	9.43344	8.33993	1.01713	0.889656	0.786528	0.884081	0.773286
247599_at	At5g60880	Encodes BASL (BREAKING OF ASYMMETRY IN THE STOMATAL LINEAGE), a regulator of asymmetric divisions. In asymmetrically dividing stomatal-lineage cells, BASL accumulates in a polarized crescent at the cell periphery before division, and then localizes differentially to the nucleus and a peripheral crescent in self-renewing cells and their sisters after division.	10.5561	11.0809	10.8528	11.2356	13.0864	12.042	11.2356	12.7286	247599_at	A	A	A	A	A	A	A	A	10.8185	11.0442	12.5642	11.9821	1.02086	1.16137	1.10756	0.953667	1.08492
247598_at	At5g60870	Regulator of chromosome condensation (RCC1) family protein; FUNCTIONS IN: Ran GTPase binding; INVOLVED IN: biological_process unknown; LOCATED IN: mitochondrion; EXPRESSED IN: 14 plant structures; EXPRESSED DURING: 7 growth stages; CONTAINS InterPro DOMAIN/s: Regulator of chromosome condensation/beta-lactamase-inhibitor protein II (InterPro:IPR009091), Regulator of chromosome condensation, RCC1 (…	44.0173	40.2244	44.3235	60.5477	40.2244	47.5048	39.1245	36.2523	247598_at	P	A	P	A	A	A	P	A	42.1209	52.4356	43.8646	37.6884	1.24488	1.0414	0.894767	0.859198	0.718756
247597_at	At5g60860	RAB GTPase homolog A1F (RABA1f); FUNCTIONS IN: GTP binding; INVOLVED IN: protein transport, small GTPase mediated signal transduction; EXPRESSED IN: 23 plant structures; EXPRESSED DURING: 15 growth stages; CONTAINS InterPro DOMAIN/s: Ras GTPase (InterPro:IPR001806), Small GTP-binding protein (InterPro:IPR005225), Small GTPase (InterPro:IPR020851), Ras (InterPro:IPR013753), Ras small GTPase, Rab t…	34.5353	39.6706	27.8576	36.0019	31.5594	38.0546	32.4467	39.3966	247597_at	P	P	P	P	A	P	P	P	37.103	31.9297	34.807	35.9217	0.860571	0.93812	0.968161	1.03202	1.12502
247601_at	At5g60850	Encodes a zinc finger protein.	224.411	243.875	149.086	188.706	152.219	227.544	177.294	242.191	247601_at	P	P	P	P	P	P	P	P	234.143	168.896	189.881	209.742	0.721337	0.810962	0.895787	1.1046	1.24184
247596_at	At5g60840	unknown protein; Has 361 Blast hits to 333 proteins in 92 species: Archae - 2; Bacteria - 55; Metazoa - 145; Fungi - 36; Plants - 42; Viruses - 19; Other Eukaryotes - 62 (source: NCBI BLink).	26.7228	27.4741	32.2226	35.7532	28.0514	31.5594	30.6965	32.2226	247596_at	A	P	A	A	P	A	P	P	27.0985	33.9879	29.8054	31.4595	1.25424	1.09989	1.16093	1.0555	0.92561
247595_at	At5g60820	RING/U-box superfamily protein; FUNCTIONS IN: zinc ion binding; EXPRESSED IN: 24 plant structures; EXPRESSED DURING: 15 growth stages; CONTAINS InterPro DOMAIN/s: Zinc finger, RING-type (InterPro:IPR001841), Zinc finger, C3HC4 RING-type (InterPro:IPR018957); BEST Arabidopsis thaliana protein match is: RING/U-box superfamily protein (TAIR:AT5G08139.1); Has 1807 Blast hits to 1807 proteins in 277 s…	75.5835	71.0124	54.5686	63.5579	65.7993	59.3016	76.1093	67.1819	247595_at	P	P	P	P	P	P	P	P	73.298	59.0633	62.5505	71.6456	0.805797	0.853372	0.977456	1.1454	1.21303
247594_at	At5g60800	Heavy metal transport/detoxification superfamily protein ; FUNCTIONS IN: metal ion binding; INVOLVED IN: metal ion transport; EXPRESSED IN: 21 plant structures; EXPRESSED DURING: 12 growth stages; CONTAINS InterPro DOMAIN/s: Heavy metal transport/detoxification protein (InterPro:IPR006121); BEST Arabidopsis thaliana protein match is: Heavy metal transport/detoxification superfamily protein (TAIR:…	15.3482	15.3482	17.5087	19.1597	13.8326	12.996	15.1369	17.3878	247594_at	A	A	A	A	A	A	A	A	15.3482	18.3342	13.4143	16.2623	1.19455	0.873998	1.05956	1.21231	0.886996
247593_at	At5g60790	member of GCN subfamily	424.612	404.501	519.147	442.643	160.898	436.549	556.408	461.44	247593_at	P	P	P	P	P	P	P	P	414.556	480.895	298.723	508.924	1.16002	0.720586	1.22764	1.70366	1.05829
247592_at	At5g60780	member of High affinity nitrate transporter family	7.83536	8.22491	8.05564	7.94474	9.84916	8.33973	7.83536	7.88986	247592_at	A	A	A	A	A	A	A	A	8.03014	8.00019	9.09444	7.86261	0.996271	1.13254	0.979138	0.864551	0.982803
247591_at	At5g60770	member of High affinity nitrate transporter family	10.3388	9.51366	9.57983	9.84916	11.1579	11.0809	10.2674	11.1579	247591_at	A	A	A	A	A	A	A	A	9.92624	9.71449	11.1194	10.7127	0.978668	1.1202	1.07923	0.963421	1.10275
247582_at	At5g60760	P-loop containing nucleoside triphosphate hydrolases superfamily protein; BEST Arabidopsis thaliana protein match is: P-loop containing nucleoside triphosphate hydrolases superfamily protein (TAIR:AT3G45090.1); Has 1216 Blast hits to 969 proteins in 195 species: Archae - 93; Bacteria - 85; Metazoa - 220; Fungi - 67; Plants - 127; Viruses - 43; Other Eukaryotes - 581 (source: NCBI BLink).	11.1579	10.4107	12.8171	11.6318	9.51366	10.3388	11.7127	11.2356	247582_at	A	A	A	A	A	A	A	A	10.7843	12.2244	9.92624	11.4741	1.13354	0.920431	1.06396	1.15594	0.938621
247583_at	At5g60750	CAAX amino terminal protease family protein; FUNCTIONS IN: endopeptidase activity; INVOLVED IN: proteolysis; LOCATED IN: chloroplast, membrane; EXPRESSED IN: 23 plant structures; EXPRESSED DURING: 14 growth stages; CONTAINS InterPro DOMAIN/s: Abortive infection protein (InterPro:IPR003675); BEST Arabidopsis thaliana protein match is: CAAX amino terminal protease family protein (TAIR:AT1G14270.1);…	140.07	142.025	120.259	129.787	125.366	112.986	124.5	120.259	247583_at	P	P	P	P	P	P	P	P	141.047	125.023	119.176	122.379	0.88639	0.844936	0.867648	1.02688	0.978856
247613_at	At5g60740	ABC transporter family protein; FUNCTIONS IN: ATPase activity, coupled to transmembrane movement of substances; LOCATED IN: endomembrane system; EXPRESSED IN: 10 plant structures; EXPRESSED DURING: L mature pollen stage, M germinated pollen stage, 4 anthesis, C globular stage, petal differentiation and expansion stage; CONTAINS InterPro DOMAIN/s: ATPase, AAA+ type, core (InterPro:IPR003593), ABC …	8.33973	9.18959	8.33973	9.00047	9.44794	8	8.39773	8.69388	247613_at	A	A	A	A	P	A	A	A	8.76466	8.6701	8.72397	8.54581	0.989211	0.995358	0.97503	0.979578	0.985664
247612_at	At5g60730	Anion-transporting ATPase; FUNCTIONS IN: ATP binding; INVOLVED IN: cellular metal ion homeostasis, anion transport; LOCATED IN: membrane; EXPRESSED IN: 13 plant structures; EXPRESSED DURING: 9 growth stages; CONTAINS InterPro DOMAIN/s: ATPase, anion-transporting (InterPro:IPR003348); BEST Arabidopsis thaliana protein match is: P-loop containing nucleoside triphosphate hydrolases superfamily prote…	9.06307	9.25351	9.78112	9.00047	9.91766	11.6318	9.44794	9.51366	247612_at	P	P	A	A	P	A	P	P	9.15829	9.3908	10.7747	9.4808	1.02539	1.1765	1.03522	0.879911	1.00958
247590_at	At5g60720	Protein of unknown function, DUF547; FUNCTIONS IN: molecular_function unknown; INVOLVED IN: biological_process unknown; LOCATED IN: chloroplast; EXPRESSED IN: 18 plant structures; EXPRESSED DURING: 7 growth stages; CONTAINS InterPro DOMAIN/s: Protein of unknown function DUF547 (InterPro:IPR006869); BEST Arabidopsis thaliana protein match is: Protein of unknown function, DUF547 (TAIR:AT2G39690.1);…	45.5696	66.7178	20.1122	43.4113	62.6829	36.5044	38.3193	61.8199	247590_at	P	P	P	P	P	P	P	P	56.1437	31.7618	49.5937	50.0696	0.565723	0.883334	0.891812	1.0096	1.57641
247611_at	At5g60710	Zinc finger (C3HC4-type RING finger) family protein; FUNCTIONS IN: ubiquitin-protein ligase activity, zinc ion binding; INVOLVED IN: N-terminal protein myristoylation; LOCATED IN: plasma membrane; EXPRESSED IN: 24 plant structures; EXPRESSED DURING: 15 growth stages; CONTAINS InterPro DOMAIN/s: Zinc finger, RING-type (InterPro:IPR001841), Zinc finger, C3HC4 RING-type (InterPro:IPR018957), von Wil…	195.361	156.498	210.839	123.64	120.259	126.238	174.853	133.436	247611_at	P	P	P	P	P	P	P	P	175.93	167.24	123.248	154.144	0.950605	0.700555	0.876171	1.25068	0.921698
247589_at	At5g60690	REVOLUTA regulates meristem initiation at lateral positions. a member of a small homeodomain-leucine zipper family. Has overlapping functions with PHAVOLUTA and PHABULOSA.	202.251	212.306	195.361	196.72	247.28	191.341	233.941	238.856	247589_at	P	P	P	P	P	P	P	P	207.278	196.041	219.31	236.399	0.945785	1.05805	1.14049	1.07792	1.20587
247585_at	At5g60680	Protein of unknown function, DUF584; CONTAINS InterPro DOMAIN/s: Protein of unknown function DUF584 (InterPro:IPR007608); BEST Arabidopsis thaliana protein match is: Protein of unknown function, DUF584 (TAIR:AT3G45210.1); Has 1807 Blast hits to 1807 proteins in 277 species: Archae - 0; Bacteria - 0; Metazoa - 736; Fungi - 347; Plants - 385; Viruses - 0; Other Eukaryotes - 339 (source: NCBI BLink).	191.341	202.251	159.786	149.086	75.0614	118.603	149.086	127.116	247585_at	P	P	P	P	P	P	P	P	196.796	154.436	96.8324	138.101	0.784754	0.492045	0.701748	1.42619	0.894227		2
247584_at	At5g60670	Ribosomal protein L11 family protein; FUNCTIONS IN: structural constituent of ribosome; INVOLVED IN: translation, ribosome biogenesis; LOCATED IN: ribosome, cytosolic large ribosomal subunit; EXPRESSED IN: 23 plant structures; EXPRESSED DURING: 13 growth stages; CONTAINS InterPro DOMAIN/s: Ribosomal protein L11, C-terminal domain (InterPro:IPR020783), Ribosomal protein L11, N-terminal domain (Int…	202.251	183.546	257.781	233.941	209.383	183.546	302.334	242.191	247584_at	P	P	P	P	P	P	P	P	192.898	245.861	196.465	272.262	1.27456	1.01849	1.41143	1.38581	1.10738
247586_at	At5g60660	A member of the plasma membrane intrinsic protein subfamily PIP2.When expressed in yeast cells can conduct hydrogen peroxide into those cells. Mutants exhibit longer root hairs.	42.8137	61.3929	35.5062	42.5179	56.8859	59.3016	61.8199	95.0095	247586_at	P	P	P	P	P	P	P	P	52.1033	39.0121	58.0938	78.4147	0.748745	1.11497	1.50499	1.3498	2.01001
247588_at	At5g60640	Encodes a protein disulfide isomerase-like (PDIL) protein, a member of a multigene family within the thioredoxin (TRX) superfamily. Unlike several other PDI family members, transcript levels for this gene are not up-regulated in response to three different chemical inducers of ER stress (dithiothreitol, beta-mercaptoethanol, and tunicamycin). However, the level of transcripts for this gene is sli…	608.874	572.051	648.067	572.051	803.414	608.874	639.145	630.346	247588_at	P	P	P	P	P	P	P	P	590.463	610.059	706.144	634.746	1.03319	1.19592	1.075	0.89889	1.04047
247610_at	At5g60630	FUNCTIONS IN: molecular_function unknown; INVOLVED IN: biological_process unknown; LOCATED IN: endomembrane system; EXPRESSED IN: 17 plant structures; EXPRESSED DURING: 6 growth stages; BEST Arabidopsis thaliana protein match is: hydroxyproline-rich glycoprotein family protein (TAIR:AT3G45230.1); Has 1807 Blast hits to 1807 proteins in 277 species: Archae - 0; Bacteria - 0; Metazoa - 736; Fungi -…	16.9123	16.6795	16.7955	18.0009	16.2234	16	15.2422	15.5625	247610_at	A	A	A	A	A	A	A	A	16.7959	17.3982	16.1117	15.4023	1.03586	0.959264	0.917032	0.955974	0.885284
247587_at	At5g60620	Glycerol-3-phosphate acyltransferase localized to the ER. Similar to mammalian cells involved in storage oil formation.	315.173	317.365	296.112	354.588	451.944	317.365	324.034	300.246	247587_at	P	P	P	P	P	P	P	P	316.269	325.35	384.655	312.14	1.02871	1.21623	0.986944	0.811481	0.959396
247640_at	At5g60610	F-box/RNI-like superfamily protein; CONTAINS InterPro DOMAIN/s: F-box domain, cyclin-like (InterPro:IPR001810), FBD (InterPro:IPR013596), F-box domain, Skp2-like (InterPro:IPR022364), Leucine-rich repeat 2 (InterPro:IPR013101); BEST Arabidopsis thaliana protein match is: FBD, F-box and Leucine Rich Repeat domains containing protein (TAIR:AT2G26860.1); Has 1807 Blast hits to 1807 proteins in 277 s…	7.56846	7.94474	8.45614	7.3615	9.18959	7.88986	7.26015	7.3615	247640_at	A	A	A	A	P	A	A	A	7.7566	7.90882	8.53972	7.31083	1.01962	1.10096	0.94253	0.856096	0.924389
247637_at	At5g60600	Encodes a chloroplast-localized hydroxy-2-methyl-2-(E)-butenyl 4-diphosphate (HMBPP) synthase (HDS), catalyzes the formation of HMBPP from 2-C-methyl-D-erythrytol 2,4-cyclodiphosphate (MEcPP). The HDS enzyme controls the penultimate steps of the biosynthesis of IPP and dimethylallyl diphosphate (DMAPP) via the MEP pathway and may serve as a metabolic control point for SA-mediated disease resistan…	734.185	929.3	694.581	709.176	600.491	861.078	699.413	719.076	247637_at	P	P	P	P	P	P	P	P	831.742	701.879	730.785	709.244	0.843866	0.878619	0.852721	0.970524	1.01049
247642_at	At5g60590	DHBP synthase RibB-like alpha/beta domain; FUNCTIONS IN: molecular_function unknown; INVOLVED IN: biological_process unknown; LOCATED IN: chloroplast; EXPRESSED IN: 22 plant structures; EXPRESSED DURING: 13 growth stages; CONTAINS InterPro DOMAIN/s: Sua5/YciO/YrdC/YwlC (InterPro:IPR004388), DHBP synthase RibB-like alpha/beta domain (InterPro:IPR017945), Sua5/YciO/YrdC, N-terminal (InterPro:IPR006…	32.4467	40.5042	35.5062	37.014	23.4254	33.3589	48.5029	33.1285	247642_at	P	P	P	P	P	P	P	P	36.4755	36.2601	28.3921	40.8157	0.994096	0.77839	1.11899	1.43757	1.12564
247636_at	At5g60570	Galactose oxidase/kelch repeat superfamily protein; CONTAINS InterPro DOMAIN/s: Galactose oxidase/kelch, beta-propeller (InterPro:IPR011043), Kelch repeat type 1 (InterPro:IPR006652), Kelch related (InterPro:IPR013089), Kelch-type beta propeller (InterPro:IPR015915); BEST Arabidopsis thaliana protein match is: Galactose oxidase/kelch repeat superfamily protein (TAIR:AT1G26930.1); Has 1807 Blast h…	150.123	165.421	147.033	131.599	136.239	140.07	140.07	136.239	247636_at	P	P	P	P	P	P	P	P	157.772	139.316	138.154	138.154	0.883021	0.875659	0.875659	1	0.991663
247635_at	At5g60550	Encodes a geminivirus Rep interacting kinase (GRIK; GRIK1/AT3G45240, GRIK2/AT5G60550). GRIKs are SnRK1 (SNF1-related kinases) activating kinases. Both GRIKs specifically bind to the SnRK1 catalytic subunit and phosphorylate the equivalent threonine residue in its activation loop in vitro.	109.896	104.691	108.383	102.537	150.123	111.43	117.784	119.428	247635_at	P	P	P	P	P	P	P	P	107.294	105.46	130.777	118.606	0.982909	1.21886	1.10543	0.906936	1.12465
247641_at	At5g60540	Encodes a protein predicted to function in tandem with PDX1 to form glutamine amidotransferase complex with involved in vitamin B6 biosynthesis. PDX2 is predicted to function as glutaminase within the complex.	292.036	206.5	282.088	190.019	192.672	230.72	278.204	200.854	247641_at	P	P	P	P	P	P	P	P	249.268	236.053	211.696	239.529	0.946987	0.84927	0.960929	1.13148	1.01472
247645_at	At5g60530	late embryogenesis abundant protein-related / LEA protein-related; FUNCTIONS IN: molecular_function unknown; LOCATED IN: endomembrane system; EXPRESSED IN: root; CONTAINS InterPro DOMAIN/s: Root cap (InterPro:IPR009646); BEST Arabidopsis thaliana protein match is: Late embryogenesis abundant (LEA) protein-related (TAIR:AT5G60520.1); Has 1807 Blast hits to 1807 proteins in 277 species: Archae - 0;…	10.2674	9.38268	9.51366	9.44794	9.44794	8.22491	9.78112	9.31787	247645_at	A	A	A	A	A	A	A	A	9.82504	9.4808	8.83643	9.5495	0.964963	0.899378	0.971955	1.0807	1.00725
247634_at	At5g60520	Late embryogenesis abundant (LEA) protein-related; FUNCTIONS IN: molecular_function unknown; LOCATED IN: endomembrane system; EXPRESSED IN: root; CONTAINS InterPro DOMAIN/s: Root cap (InterPro:IPR009646); BEST Arabidopsis thaliana protein match is: late embryogenesis abundant protein-related / LEA protein-related (TAIR:AT5G60530.1); Has 1807 Blast hits to 1807 proteins in 277 species: Archae - 0;…	14.42	11.9588	12.6407	12.5533	12.4666	14.0257	11.5514	12.295	247634_at	P	A	A	A	A	A	A	A	13.1894	12.597	13.2462	11.9232	0.955085	1.0043	0.904	0.900126	0.946512
247639_s_at	At5g60500	Undecaprenyl pyrophosphate synthetase family protein; FUNCTIONS IN: transferase activity, transferring alkyl or aryl (other than methyl) groups; CONTAINS InterPro DOMAIN/s: Di-trans-poly-cis-decaprenylcistransferase-like, conserved site (InterPro:IPR018520), Di-trans-poly-cis-decaprenylcistransferase-like (InterPro:IPR001441); BEST Arabidopsis thaliana protein match is: Undecaprenyl pyrophosphate…	5.93809	5.57897	5.42642	5.54044	5.54044	5.20537	5.20537	5.89708	247639_s_at	P	P	A	A	A	P	A	P	5.75853	5.48343	5.3729	5.55122	0.952226	0.933033	0.963999	1.03319	1.01236
247638_at	At5g60490	Encodes a member of fasciclin-like arabinogalactan proteins (FLAs) containing a cell adhesion fasciclin (FAS) domain. Mutations result in altered stem biomechanics with reduced tensile strength and reduced tensile modulus of elasticity, as well as altered cell wall architecture and composition, with increased cellulose microfibril angle, reduced arabinose, galactose and cellulose content.	484.382	666.287	237.207	415.873	276.282	328.557	347.291	604.668	247638_at	P	P	P	P	P	P	P	P	575.334	326.54	302.42	475.979	0.567566	0.525642	0.827309	1.5739	1.45765
247633_at	At5g60470	C2H2 and C2HC zinc fingers superfamily protein; FUNCTIONS IN: sequence-specific DNA binding transcription factor activity, zinc ion binding, nucleic acid binding; INVOLVED IN: regulation of transcription; LOCATED IN: intracellular; EXPRESSED IN: stem, sepal, carpel, stamen; EXPRESSED DURING: 4 anthesis; CONTAINS InterPro DOMAIN/s: Zinc finger, C2H2-like (InterPro:IPR015880), Zinc finger, C2H2-typ…	17.5087	14.0257	19.1597	13.737	18.7654	14.42	12.5533	15.0324	247633_at	P	P	P	P	P	P	P	P	15.7672	16.4484	16.5927	13.7929	1.0432	1.05235	0.874782	0.831261	0.838555
247632_at	At5g60460	Preprotein translocase Sec, Sec61-beta subunit protein; FUNCTIONS IN: protein transporter activity; INVOLVED IN: protein transport; LOCATED IN: plasma membrane; EXPRESSED IN: 22 plant structures; EXPRESSED DURING: 13 growth stages; CONTAINS InterPro DOMAIN/s: Preprotein translocase Sec, Sec61-beta subunit, eukarya (InterPro:IPR016482), Preprotein translocase Sec, Sec61-beta subunit (InterPro:IPR0…	152.219	137.187	178.527	153.277	136.239	138.141	168.897	146.018	247632_at	P	P	P	P	P	P	P	P	144.703	165.902	137.19	157.457	1.1465	0.948084	1.08814	1.14773	0.949097
247643_at	At5g60450	Encodes a member of the ARF family of transcription factors which mediate auxin responses. ARF4 appears to have redundant function with ETT(ARF3) in specifying abaxial cell identity.	526.394	484.382	519.147	474.413	404.501	474.413	487.751	458.253	247643_at	P	P	P	P	P	P	P	P	505.388	496.78	439.457	473.002	0.982968	0.869544	0.935918	1.07633	0.952135
247631_at	At5g60440	AGL62 encodes a Type I MADS domain protein that likely functions as a transcription factor. It is expressed AGL62 is expressed exclusively in the endosperm. AGL62 supresses suppresses cellularization during the syncytial phase of endosperm development.	10.7034	10.4831	10.7779	9.78112	14.9285	10.6295	9.06307	9.91766	247631_at	P	P	P	P	P	P	P	P	10.5933	10.2795	12.779	9.49037	0.970379	1.20633	0.895885	0.742653	0.923233
247630_at	At5g60420	putative protein	186.108	178.527	219.793	162.017	116.162	200.854	213.783	210.839	247630_at	P	P	P	P	P	P	P	P	182.318	190.905	158.508	212.311	1.0471	0.869405	1.16451	1.33943	1.11213
247629_at	At5g60410	Encodes a plant small ubiquitin-like modifier (SUMO) E3 ligase that is a focal controller of Pi starvation-dependent responses. Also required for SA and PAD4-mediated R gene signalling, which in turn confers innate immunity in Arabidopsis. Also involved in the regulation of plant growth, drought responses and freezing tolerance. This latter effect is most likely due to SIZ1 dependent ABI5 sumoyla…	27.8576	29.0406	29.2426	27.8576	15.455	25.8125	28.2465	27.4741	247629_at	P	P	P	P	P	P	P	P	28.4491	28.5501	20.6338	27.8603	1.00355	0.725286	0.979303	1.35023	0.975838
247628_at	At5g60400	unknown protein; Has 35333 Blast hits to 34131 proteins in 2444 species: Archae - 798; Bacteria - 22429; Metazoa - 974; Fungi - 991; Plants - 531; Viruses - 0; Other Eukaryotes - 9610 (source: NCBI BLink).	53.0765	43.1115	32.6724	39.6706	63.5579	32.6724	50.9143	49.8665	247628_at	P	P	P	P	P	P	P	P	48.094	36.1715	48.1152	50.3904	0.752101	1.00044	1.04775	1.04729	1.3931
247644_s_at	At5g60390	GTP binding Elongation factor Tu family protein; FUNCTIONS IN: calmodulin binding, translation elongation factor activity; INVOLVED IN: translational elongation; LOCATED IN: mitochondrion, nucleus, plasma membrane, vacuole, cytoplasm; EXPRESSED IN: 6 plant structures; EXPRESSED DURING: L mature pollen stage, M germinated pollen stage, seed development stages; CONTAINS InterPro DOMAIN/s: Translati…	3983.99	4124.49	5148.73	4182.07	2896.31	3902.01	4938.99	4153.18	247644_s_at	P	P	P	P	P	P	P	P	4054.24	4665.4	3399.16	4546.08	1.15074	0.83842	1.12132	1.33741	0.974426
247627_at	At5g60360	Encodes a senescence-associated thiol protease.	6295.04	6936.54	6793.79	6382.92	4803.93	6841.04	6427.31	5955.47	247627_at	P	P	P	P	P	P	P	P	6615.79	6588.35	5822.49	6191.39	0.995853	0.880089	0.935851	1.06336	0.939748
247622_at	At5g60350	unknown protein; Has 110 Blast hits to 97 proteins in 36 species: Archae - 0; Bacteria - 10; Metazoa - 39; Fungi - 2; Plants - 5; Viruses - 0; Other Eukaryotes - 54 (source: NCBI BLink).	7.46426	6.86852	8.39773	7.83536	6.82108	8.05564	6.82108	6.82108	247622_at	A	A	A	A	A	A	A	A	7.16639	8.11655	7.43836	6.82108	1.13258	1.03795	0.951815	0.917014	0.840392
247621_at	At5g60340	P-loop containing nucleoside triphosphate hydrolases superfamily protein; FUNCTIONS IN: oxidoreductase activity, ATP binding; INVOLVED IN: metabolic process; LOCATED IN: mitochondrion; EXPRESSED IN: 7 plant structures; EXPRESSED DURING: LP.04 four leaves visible, C globular stage, petal differentiation and expansion stage, D bilateral stage; CONTAINS InterPro DOMAIN/s: ATPase, AAA-type, core (Int…	10.2674	9.91766	10.8528	9.57983	13.9288	9.71356	9.98664	10.6295	247621_at	A	A	A	A	P	A	A	A	10.0925	10.2163	11.8212	10.3081	1.01227	1.17128	1.02136	0.871999	1.00898
247623_at	At5g60320	Concanavalin A-like lectin protein kinase family protein; FUNCTIONS IN: kinase activity; INVOLVED IN: protein amino acid phosphorylation; LOCATED IN: endomembrane system; CONTAINS InterPro DOMAIN/s: Legume lectin, beta chain (InterPro:IPR001220), Protein kinase, ATP binding site (InterPro:IPR017441), Serine/threonine-protein kinase-like domain (InterPro:IPR017442), Concanavalin A-like lectin/gluc…	6.58873	7.46426	6.23332	7.06162	6.9163	6.6807	6.1475	6.40856	247623_at	A	A	A	A	P	P	A	A	7.0265	6.64747	6.7985	6.27803	0.946058	0.967552	0.893479	0.923443	0.944424
247620_at	At5g60310	Concanavalin A-like lectin protein kinase family protein; FUNCTIONS IN: kinase activity; INVOLVED IN: protein amino acid phosphorylation; LOCATED IN: endomembrane system; CONTAINS InterPro DOMAIN/s: Legume lectin, beta chain (InterPro:IPR001220), Serine/threonine-protein kinase-like domain (InterPro:IPR017442), Concanavalin A-like lectin/glucanase, subgroup (InterPro:IPR013320), Protein kinase-li…	10.7779	9.91766	10.7779	11.7942	10.7034	11.3924	10.4107	11.4716	247620_at	A	A	A	A	A	A	A	A	10.3478	11.286	11.0479	10.9412	1.09067	1.06766	1.05735	0.99034	0.969447
247626_at	At5g60300	Lectin Receptor Kinase involved in protein-protein interactions with RGD-containing proteins as potential ligands. Role in cell wall-plasma membrane adhesion. Involved in Phytophthora resistance.	89.8845	106.891	76.6386	108.383	111.43	105.42	94.3532	114.563	247626_at	A	P	P	P	P	P	P	P	98.3879	92.511	108.425	104.458	0.940269	1.10202	1.0617	0.963414	1.12914
247619_at	At5g60290	unknown protein; Has 1807 Blast hits to 1807 proteins in 277 species: Archae - 0; Bacteria - 0; Metazoa - 736; Fungi - 347; Plants - 385; Viruses - 0; Other Eukaryotes - 339 (source: NCBI BLink).	9.44794	8.45614	9.78112	8.1681	8.57419	8.45614	8.81524	9.91766	247619_at	A	A	A	A	A	A	P	A	8.95204	8.97461	8.51517	9.36645	1.00252	0.951198	1.04629	1.09997	1.04366
247618_at	At5g60280	Concanavalin A-like lectin protein kinase family protein; FUNCTIONS IN: kinase activity; INVOLVED IN: protein amino acid phosphorylation; LOCATED IN: endomembrane system; EXPRESSED IN: root; CONTAINS InterPro DOMAIN/s: Legume lectin, beta chain (InterPro:IPR001220), Protein kinase, ATP binding site (InterPro:IPR017441), Serine/threonine-protein kinase-like domain (InterPro:IPR017442), Concanavali…	6.58873	6.10504	6.19026	6.86852	7.06162	5.50217	6.72717	6.86852	247618_at	A	A	A	A	A	A	A	A	6.34688	6.52939	6.2819	6.79785	1.02876	0.989761	1.07105	1.08213	1.04111
247617_at	At5g60270	Concanavalin A-like lectin protein kinase family protein; FUNCTIONS IN: kinase activity; INVOLVED IN: protein amino acid phosphorylation; LOCATED IN: plasma membrane; EXPRESSED IN: 6 plant structures; EXPRESSED DURING: 6 growth stages; CONTAINS InterPro DOMAIN/s: Legume lectin, beta chain (InterPro:IPR001220), Protein kinase, ATP binding site (InterPro:IPR017441), Serine/threonine-protein kinase-…	15.6707	13.0864	13.737	16.5642	12.7286	16	12.3805	12.5533	247617_at	A	P	A	P	A	P	P	A	14.3786	15.1506	14.3643	12.4669	1.0537	0.999006	0.867049	0.867911	0.822865
247616_at	At5g60260	unknown protein; Has 1807 Blast hits to 1807 proteins in 277 species: Archae - 0; Bacteria - 0; Metazoa - 736; Fungi - 347; Plants - 385; Viruses - 0; Other Eukaryotes - 339 (source: NCBI BLink).	11.3924	12.3805	11.3137	15.6707	11.3137	11.7127	10.2674	10.9283	247616_at	A	P	A	A	A	A	A	A	11.8865	13.4922	11.5132	10.5979	1.13509	0.968598	0.891591	0.920497	0.78548
247615_at	At5g60250	zinc finger (C3HC4-type RING finger) family protein; FUNCTIONS IN: zinc ion binding, nucleic acid binding; EXPRESSED IN: 14 plant structures; EXPRESSED DURING: 8 growth stages; CONTAINS InterPro DOMAIN/s: Zinc finger, RING-type, conserved site (InterPro:IPR017907), Zinc finger, C6HC-type (InterPro:IPR002867), Zinc finger, RING-type (InterPro:IPR001841), Polynucleotidyl transferase, ribonuclease H…	8.81524	8.87656	8.63383	9.18959	10.7779	9.12611	8.81524	8.51496	247615_at	P	P	A	A	P	A	P	A	8.8459	8.91171	9.95199	8.6651	1.00744	1.12504	0.979561	0.87069	0.972328
247614_at	At5g60240	unknown protein; Has 1807 Blast hits to 1807 proteins in 277 species: Archae - 0; Bacteria - 0; Metazoa - 736; Fungi - 347; Plants - 385; Viruses - 0; Other Eukaryotes - 339 (source: NCBI BLink).	17.1484	18.2522	16.2234	17.6305	17.6305	17.8766	14.6213	16.5642	247614_at	A	A	A	A	P	A	A	A	17.7003	16.9269	17.7535	15.5928	0.956307	1.00301	0.880933	0.878291	0.921182
247673_at	At5g60230	putative subunit of tRNA splicing endonuclease	40.7859	38.8542	44.9422	44.6318	63.5579	36.2523	41.0696	38.3193	247673_at	P	P	P	P	P	P	P	P	39.8201	44.787	49.9051	39.6945	1.12473	1.25326	0.996845	0.795399	0.886294
247672_at	At5g60220	Member of TETRASPANIN family	13.737	11.8762	12.9063	15.455	11.8762	14.723	11.0809	14.8254	247672_at	P	P	P	P	A	P	A	A	12.8066	14.1806	13.2996	12.9531	1.10729	1.03849	1.01144	0.97395	0.913439
247671_at	At5g60210	ROP interactive partner 5 (RIP5); LOCATED IN: plasma membrane; EXPRESSED IN: 22 plant structures; EXPRESSED DURING: 12 growth stages; BEST Arabidopsis thaliana protein match is: ROP interactive partner 3 (TAIR:AT2G37080.1); Has 98994 Blast hits to 51471 proteins in 2911 species: Archae - 1324; Bacteria - 16057; Metazoa - 45939; Fungi - 8665; Plants - 5713; Viruses - 271; Other Eukaryotes - 21025 …	73.0089	59.7141	70.0348	60.5477	79.3413	59.7141	64.4452	57.2816	247671_at	P	P	P	P	P	P	P	P	66.3615	65.2912	69.5277	60.8634	0.983872	1.04771	0.917149	0.875383	0.932183
247625_at	At5g60200	Encodes a Dof-type transcription factor.	61.8199	51.9842	68.5935	75.0614	25.4572	61.3929	60.1295	71.5064	247625_at	P	P	P	P	A	P	P	P	56.902	71.8275	43.425	65.8179	1.2623	0.763154	1.15669	1.51567	0.916334
247670_at	At5g60190	Encodes a protein that can cleave residues from the C-terminus of RUB1 to prepare it for conjugation to target proteins.	35.261	33.3589	36.0019	32.2226	34.0598	31.125	37.5307	29.0406	247670_at	P	P	P	P	P	P	P	P	34.3099	34.1122	32.5924	33.2857	0.994238	0.949941	0.970147	1.02127	0.975769
247669_at	At5g60170	RNA binding (RRM/RBD/RNP motifs) family protein; FUNCTIONS IN: RNA binding, nucleotide binding, zinc ion binding, nucleic acid binding; INVOLVED IN: biological_process unknown; LOCATED IN: cellular_component unknown; EXPRESSED IN: 24 plant structures; EXPRESSED DURING: 15 growth stages; CONTAINS InterPro DOMAIN/s: Zinc finger, RING-type (InterPro:IPR001841), RNA recognition motif, RNP-1 (InterPro…	72.5046	81.0084	65.3448	57.2816	78.7932	60.9688	60.5477	58.892	247669_at	P	P	P	P	P	P	P	P	76.7565	61.3132	69.881	59.7198	0.798801	0.910425	0.778043	0.854593	0.974013
247624_at	At5g60160	Zn-dependent exopeptidases superfamily protein; FUNCTIONS IN: aminopeptidase activity, zinc ion binding; INVOLVED IN: response to cadmium ion, proteolysis; LOCATED IN: plasma membrane, vacuole; EXPRESSED IN: 26 plant structures; EXPRESSED DURING: 15 growth stages; CONTAINS InterPro DOMAIN/s: Peptidase M18, aminopeptidase I (InterPro:IPR001948); BEST Arabidopsis thaliana protein match is: Zn-depen…	308.687	324.034	337.794	344.892	407.315	306.555	315.173	280.139	247624_at	P	P	P	P	P	P	P	P	316.36	341.343	356.935	297.656	1.07897	1.12825	0.940877	0.833923	0.872015
247667_at	At5g60150	unknown protein; Has 1807 Blast hits to 1807 proteins in 277 species: Archae - 0; Bacteria - 0; Metazoa - 736; Fungi - 347; Plants - 385; Viruses - 0; Other Eukaryotes - 339 (source: NCBI BLink).	11.5514	10.9283	11.0809	11.2356	11.3924	11.9588	10.1261	12.6407	247667_at	A	A	A	P	P	P	P	P	11.2399	11.1582	11.6756	11.3834	0.992735	1.03877	1.01277	0.97497	1.02018
247666_at	At5g60140	AP2/B3-like transcriptional factor family protein; FUNCTIONS IN: DNA binding, sequence-specific DNA binding transcription factor activity; INVOLVED IN: regulation of transcription, DNA-dependent; LOCATED IN: cellular_component unknown; EXPRESSED IN: 7 plant structures; EXPRESSED DURING: 4 anthesis, C globular stage, petal differentiation and expansion stage; CONTAINS InterPro DOMAIN/s: Transcript…	7.06162	6.32033	6.36429	6.1475	6.72717	6.36429	6.58873	6.9163	247666_at	P	A	P	A	A	P	P	A	6.69098	6.2559	6.54573	6.75251	0.934975	0.978292	1.0092	1.03159	1.07938
247665_at	At5g60130	AP2/B3-like transcriptional factor family protein; FUNCTIONS IN: DNA binding, sequence-specific DNA binding transcription factor activity; INVOLVED IN: regulation of transcription, DNA-dependent; LOCATED IN: cellular_component unknown; CONTAINS InterPro DOMAIN/s: Transcriptional factor B3 (InterPro:IPR003340); BEST Arabidopsis thaliana protein match is: AP2/B3-like transcriptional factor family p…	6.36429	6.72717	6.58873	7.46426	7.51618	6.6807	6.49802	7.01285	247665_at	A	A	A	A	A	A	A	A	6.54573	7.0265	7.09844	6.75543	1.07345	1.08444	1.03204	0.951678	0.961423
247664_at	At5g60120	target of early activation tagged (EAT) 2 (TOE2); FUNCTIONS IN: DNA binding, sequence-specific DNA binding transcription factor activity; INVOLVED IN: regulation of transcription, DNA-dependent; LOCATED IN: nucleus; EXPRESSED IN: 22 plant structures; EXPRESSED DURING: 13 growth stages; CONTAINS InterPro DOMAIN/s: DNA-binding, integrase-type (InterPro:IPR016177), Pathogenesis-related transcription…	25.4572	28.2465	25.9921	17.3878	28.2465	25.6342	20.393	23.4254	247664_at	P	P	P	P	P	P	P	P	26.8518	21.6899	26.9404	21.9092	0.807763	1.0033	0.815928	0.813247	1.01011
247663_at	At5g60110	Encodes a member of the Arabidopsis Pumilio (APUM) proteins containing PUF domain (eight repeats of approximately 36 amino acids each). PUF proteins regulate both mRNA stability and translation through sequence-specific binding to the 3' UTR of target mRNA transcripts.	5.54044	5.61778	6.82108	6.19026	6.02099	5.93809	6.40856	6.02099	247663_at	A	A	A	A	A	A	A	A	5.57911	6.50567	5.97954	6.21477	1.16608	1.07177	1.11394	1.03934	0.955286
247668_at	At5g60100	Encodes pseudo-response regulator 3 (APRR3/PRR3). PRR3 transcript levels vary in a circadian pattern with peak expression at dusk under long and short day conditions. PRR3 affects the period of the circadian clock and seedlings with reduced levels of PRR3 have shorter periods, based on transcriptional assays of clock-regulated genes. PRR3 is expressed in the vasculature of cotyledons and leaves w…	243.875	121.938	257.781	133.436	296.112	151.167	256	159.786	247668_at	P	P	P	P	P	P	P	P	182.906	195.608	223.64	207.893	1.06944	1.2227	1.13661	0.92959	1.0628
247662_at	At5g60090	Protein kinase superfamily protein; FUNCTIONS IN: protein kinase activity, kinase activity, ATP binding; INVOLVED IN: protein amino acid phosphorylation; LOCATED IN: cellular_component unknown; EXPRESSED IN: leaf whorl, sepal, flower; EXPRESSED DURING: petal differentiation and expansion stage; CONTAINS InterPro DOMAIN/s: Protein kinase, catalytic domain (InterPro:IPR000719), Serine-threonine/tyr…	9.78112	11.0809	10.5561	11.5514	8	10.2674	9.78112	10.3388	247662_at	A	A	A	A	A	A	A	A	10.431	11.0537	9.1337	10.06	1.0597	0.875631	0.96443	1.10141	0.910096
247661_at	At5g60080	Protein kinase superfamily protein; FUNCTIONS IN: protein kinase activity, kinase activity, ATP binding; INVOLVED IN: protein amino acid phosphorylation; LOCATED IN: cellular_component unknown; EXPRESSED IN: central cell, leaf whorl, flower; EXPRESSED DURING: petal differentiation and expansion stage; CONTAINS InterPro DOMAIN/s: Protein kinase, catalytic domain (InterPro:IPR000719), Serine/threon…	7.88986	8.69388	10.0561	9.44794	7.3615	9.18959	7.88986	7.1602	247661_at	P	A	A	A	A	P	P	A	8.29187	9.75202	8.27554	7.52503	1.17609	0.998031	0.907519	0.90931	0.771638
247660_at	At5g60070	ankyrin repeat family protein; CONTAINS InterPro DOMAIN/s: Ankyrin repeat-containing domain (InterPro:IPR020683), Ankyrin repeat (InterPro:IPR002110); BEST Arabidopsis thaliana protein match is: Ankyrin repeat family protein (TAIR:AT1G07710.1); Has 1807 Blast hits to 1807 proteins in 277 species: Archae - 0; Bacteria - 0; Metazoa - 736; Fungi - 347; Plants - 385; Viruses - 0; Other Eukaryotes - 3…	9.25351	8.63383	8.9383	10.1261	7.78124	10.7034	7.88986	9.25351	247660_at	A	A	A	A	A	A	A	A	8.94367	9.53217	9.24233	8.57168	1.0658	1.03339	0.958408	0.927438	0.899237
247659_at	At5g60040	Encodes a subunit of RNA polymerase III (aka RNA polymerase C).	9.18959	9.44794	8.69388	10.1261	9.44794	9.64646	9.44794	10.1965	247659_at	A	P	A	P	A	P	P	P	9.31876	9.40997	9.5472	9.82221	1.00979	1.02451	1.05403	1.02881	1.04381
247649_at	At5g60030	unknown protein; BEST Arabidopsis thaliana protein match is: unknown protein (TAIR:AT1G75335.1); Has 1807 Blast hits to 1807 proteins in 277 species: Archae - 0; Bacteria - 0; Metazoa - 736; Fungi - 347; Plants - 385; Viruses - 0; Other Eukaryotes - 339 (source: NCBI BLink).	7.46426	6.6807	7.01285	6.77396	8.75435	6.40856	7.72749	6.63456	247649_at	P	M	P	P	A	P	P	P	7.07248	6.8934	7.58145	7.18102	0.974679	1.07196	1.01535	0.947183	1.04172
247648_at	At5g60020	LAC17 appears to have laccase activity based on enzyme assays performed using lac17 mutants. Notably, these mutants appear to have a reduced deposition of G lignin units. LAC17 is expressed in interfascicular fibers and likely contributes to lignin biosynthesis, and hence, cell wall biosynthesis, there.	242.191	337.794	91.7731	178.527	192.672	156.498	159.786	286.026	247648_at	P	P	P	P	P	P	P	P	289.992	135.15	174.585	222.906	0.466047	0.602032	0.768661	1.27678	1.64932
247647_at	At5g60010	ferric reductase-like transmembrane component family protein; FUNCTIONS IN: in 8 functions; INVOLVED IN: oxidation reduction; LOCATED IN: integral to membrane, membrane; EXPRESSED IN: 7 plant structures; EXPRESSED DURING: L mature pollen stage, M germinated pollen stage, 4 anthesis, LP.10 ten leaves visible, petal differentiation and expansion stage; CONTAINS InterPro DOMAIN/s: Ferredoxin reducta…	7.67411	8.33973	7.51618	9.57983	7.67411	8.1681	6.9163	8.63383	247647_at	A	A	A	P	A	A	A	A	8.00692	8.54801	7.9211	7.77506	1.06758	0.989282	0.971043	0.981563	0.909576
247646_at	At5g59990	CCT motif family protein; CONTAINS InterPro DOMAIN/s: CCT domain (InterPro:IPR010402); BEST Arabidopsis thaliana protein match is: CCT motif family protein (TAIR:AT5G41380.1); Has 1807 Blast hits to 1807 proteins in 277 species: Archae - 0; Bacteria - 0; Metazoa - 736; Fungi - 347; Plants - 385; Viruses - 0; Other Eukaryotes - 339 (source: NCBI BLink).	16.7955	18.1261	12.1257	15.2422	9.71356	12.3805	9.57983	11.3137	247646_at	P	P	P	P	A	P	P	A	17.4608	13.684	11.047	10.4468	0.783696	0.632676	0.598298	0.945662	0.763431
247676_at	At5g59980	Polymerase/histidinol phosphatase-like; FUNCTIONS IN: tRNA-intron endonuclease activity, ribonuclease activity, catalytic activity; INVOLVED IN: tRNA processing; LOCATED IN: cellular_component unknown; EXPRESSED IN: trichome; CONTAINS InterPro DOMAIN/s: Polymerase/histidinol phosphatase-like (InterPro:IPR016195), RNase P subunit p30 (InterPro:IPR002738); Has 1908 Blast hits to 1535 proteins in 33…	29.8571	28.443	31.125	30.91	39.9466	23.5883	28.2465	25.8125	247676_at	P	P	P	P	P	P	P	P	29.15	31.0175	31.7674	27.0295	1.06406	1.08979	0.927256	0.850856	0.871429
247650_at	At5g59960	unknown protein; FUNCTIONS IN: molecular_function unknown; INVOLVED IN: biological_process unknown; LOCATED IN: nucleus; EXPRESSED IN: 24 plant structures; EXPRESSED DURING: 15 growth stages; Has 30201 Blast hits to 17322 proteins in 780 species: Archae - 12; Bacteria - 1396; Metazoa - 17338; Fungi - 3422; Plants - 5037; Viruses - 0; Other Eukaryotes - 2996 (source: NCBI BLink).	55.7152	68.1197	56.8859	50.2134	82.7106	58.0812	56.493	45.2548	247650_at	P	P	P	P	P	P	P	P	61.9175	53.5497	70.3959	50.8739	0.864855	1.13693	0.821641	0.722683	0.950032
247653_at	At5g59950	RNA-binding (RRM/RBD/RNP motifs) family protein; FUNCTIONS IN: nucleotide binding, nucleic acid binding; INVOLVED IN: biological_process unknown; LOCATED IN: chloroplast; EXPRESSED IN: 25 plant structures; EXPRESSED DURING: 15 growth stages; CONTAINS InterPro DOMAIN/s: RNA recognition motif, RNP-1 (InterPro:IPR000504), Nucleotide-binding, alpha-beta plait (InterPro:IPR012677); BEST Arabidopsis th…	326.288	276.282	333.144	265.028	90.5097	292.036	326.288	274.374	247653_at	P	P	P	P	P	P	P	P	301.285	299.086	191.273	300.331	0.9927	0.634856	0.996833	1.57017	1.00416
247675_at	At5g59940	Cysteine/Histidine-rich C1 domain family protein; FUNCTIONS IN: zinc ion binding; INVOLVED IN: intracellular signaling pathway; LOCATED IN: cellular_component unknown; EXPRESSED IN: 13 plant structures; EXPRESSED DURING: LP.04 four leaves visible, 4 anthesis, petal differentiation and expansion stage, D bilateral stage; CONTAINS InterPro DOMAIN/s: Protein kinase C-like, phorbol ester/diacylglycer…	13.3614	11.1579	11.0809	11.9588	14.1232	13.6422	10.8528	12.996	247675_at	P	A	P	A	A	A	P	A	12.2597	11.5198	13.8827	11.9244	0.939652	1.13239	0.972655	0.858942	1.03512
247674_at	At5g59930	Cysteine/Histidine-rich C1 domain family protein; FUNCTIONS IN: zinc ion binding; INVOLVED IN: intracellular signaling pathway; EXPRESSED IN: root; CONTAINS InterPro DOMAIN/s: Protein kinase C-like, phorbol ester/diacylglycerol binding (InterPro:IPR002219), DC1 (InterPro:IPR004146), Zinc finger, PHD-type (InterPro:IPR001965), Zinc finger, ZZ-type (InterPro:IPR000433), C1-like (InterPro:IPR011424)…	8.11168	7.67411	6.82108	9.25351	8.28212	7.83536	7.56846	7.78124	247674_at	A	A	A	A	A	A	A	A	7.89289	8.03729	8.05874	7.67485	1.01829	1.02101	0.972375	0.952363	0.954905
247652_at	At5g59910	HTB4; FUNCTIONS IN: DNA binding; INVOLVED IN: nucleosome assembly; LOCATED IN: nucleolus; EXPRESSED IN: 24 plant structures; EXPRESSED DURING: 13 growth stages; CONTAINS InterPro DOMAIN/s: Histone H2B (InterPro:IPR000558), Histone-fold (InterPro:IPR009072), Histone core (InterPro:IPR007125); BEST Arabidopsis thaliana protein match is: Histone superfamily protein (TAIR:AT3G45980.1); Has 1807 Blast…	519.147	474.413	530.056	530.056	464.65	442.643	592.224	580.037	247652_at	P	P	P	P	P	P	P	P	496.78	530.056	453.646	586.13	1.06698	0.913173	1.17986	1.29204	1.10579
247701_at	At5g59900	Pentatricopeptide repeat (PPR) superfamily protein; CONTAINS InterPro DOMAIN/s: Pentatricopeptide repeat (InterPro:IPR002885); BEST Arabidopsis thaliana protein match is: Pentatricopeptide repeat (PPR) superfamily protein (TAIR:AT5G55840.1); Has 1807 Blast hits to 1807 proteins in 277 species: Archae - 0; Bacteria - 0; Metazoa - 736; Fungi - 347; Plants - 385; Viruses - 0; Other Eukaryotes - 339 …	8.57419	9.12611	8.05564	8.28212	7.94474	9.91766	9.57983	8.22491	247701_at	A	A	A	P	A	P	P	A	8.85015	8.16888	8.9312	8.90237	0.923022	1.00916	1.0059	0.996772	1.08979
247656_at	At5g59890	actin depolymerizing factor 4 (ADF4) mRNA, complete cds	584.071	600.491	501.463	600.491	666.287	617.374	680.287	719.076	247656_at	P	P	P	P	P	P	P	P	592.281	550.977	641.83	699.681	0.930263	1.08366	1.18133	1.09013	1.26989
247658_at	At5g59880	Encodes actin depolymerizing factor 3 (ADF3).	1200.98	1160.07	1243.34	1168.14	1144.1	1323.37	1360.57	1314.23	247658_at	P	P	P	P	P	P	P	P	1180.53	1205.74	1233.74	1337.4	1.02136	1.04507	1.13288	1.08403	1.1092
247651_at	At5g59870	Encodes HTA6, a histone H2A protein.	24.761	23.2636	34.0598	26.5382	40.7859	21.4068	24.59	25.6342	247651_at	P	P	P	P	P	A	P	P	24.0123	30.299	31.0964	25.1121	1.26181	1.29502	1.0458	0.807557	0.828809
247700_at	At5g59860	RNA-binding (RRM/RBD/RNP motifs) family protein; FUNCTIONS IN: RNA binding, nucleotide binding, nucleic acid binding; INVOLVED IN: biological_process unknown; LOCATED IN: cellular_component unknown; CONTAINS InterPro DOMAIN/s: RNA recognition motif, RNP-1 (InterPro:IPR000504), Nucleotide-binding, alpha-beta plait (InterPro:IPR012677); BEST Arabidopsis thaliana protein match is: RNA-binding (RRM/R…	8.51496	8.87656	7.78124	7.78124	7.67411	7.83536	8.28212	9.12611	247700_at	A	A	A	A	A	A	A	P	8.69576	7.78124	7.75474	8.70411	0.894832	0.891784	1.00096	1.12243	1.1186
247654_at	At5g59850	Ribosomal protein S8 family protein; FUNCTIONS IN: structural constituent of ribosome; INVOLVED IN: translation; LOCATED IN: cytosolic small ribosomal subunit, cell wall, membrane; EXPRESSED IN: 22 plant structures; EXPRESSED DURING: 13 growth stages; CONTAINS InterPro DOMAIN/s: Ribosomal protein S8 (InterPro:IPR000630); BEST Arabidopsis thaliana protein match is: ribosomal protein S15A (TAIR:AT1…	213.783	216.767	298.172	296.112	292.036	252.476	337.794	249	247654_at	P	P	P	P	P	P	P	P	215.275	297.142	272.256	293.397	1.38029	1.26469	1.3629	1.07765	0.987396
247657_at	At5g59845	Gibberellin-regulated family protein; FUNCTIONS IN: molecular_function unknown; INVOLVED IN: response to gibberellin stimulus; LOCATED IN: endomembrane system; EXPRESSED IN: 22 plant structures; EXPRESSED DURING: 13 growth stages; CONTAINS InterPro DOMAIN/s: Gibberellin regulated protein (InterPro:IPR003854); BEST Arabidopsis thaliana protein match is: Gibberellin-regulated family protein (TAIR:A…	9.91766	10.1965	9.84916	8.87656	10.1261	9.84916	9.44794	10.4107	247657_at	P	P	P	P	P	P	P	P	10.0571	9.36286	9.9876	9.92934	0.930972	0.993092	0.987299	0.994166	1.0605
247699_at	At5g59840	Ras-related small GTP-binding family protein; FUNCTIONS IN: GTP binding; INVOLVED IN: protein transport, small GTPase mediated signal transduction; LOCATED IN: plasma membrane; EXPRESSED IN: 23 plant structures; EXPRESSED DURING: 15 growth stages; CONTAINS InterPro DOMAIN/s: Ras GTPase (InterPro:IPR001806), Small GTP-binding protein (InterPro:IPR005225), Small GTPase (InterPro:IPR020851), Ras (In…	159.786	170.072	125.366	139.102	154.343	135.298	146.018	142.025	247699_at	P	P	P	P	P	P	P	P	164.929	132.234	144.821	144.021	0.801763	0.87808	0.873232	0.994479	1.08914
247698_at	At5g59830	unknown protein; BEST Arabidopsis thaliana protein match is: unknown protein (TAIR:AT5G13660.2); Has 174 Blast hits to 139 proteins in 16 species: Archae - 0; Bacteria - 0; Metazoa - 0; Fungi - 0; Plants - 172; Viruses - 0; Other Eukaryotes - 2 (source: NCBI BLink).	116.97	115.36	117.784	116.97	167.73	107.635	128.89	117.784	247698_at	P	P	P	P	P	P	P	P	116.165	117.377	137.683	123.337	1.01043	1.18523	1.06174	0.895808	1.05078
247655_at	At5g59820	Encodes a zinc finger protein involved in high light and cold acclimation. Overexpression of this putative transcription factor increases the expression level of 9 cold-responsive genes and represses the expression level of 15 cold-responsive genes, including CBF genes. Also, lines overexpressing this gene exhibits a small but reproducible increase in freeze tolerance. Because of the repression o…	39.6706	46.5271	207.937	170.072	165.421	315.173	296.112	302.334	247655_at	P	P	P	P	P	P	P	P	43.0989	189.004	240.297	299.223	4.38536	5.57548	6.94271	1.24522	1.58316	1	1	1
247697_at	At5g59810	SBT5.4; FUNCTIONS IN: identical protein binding, serine-type endopeptidase activity; INVOLVED IN: proteolysis, negative regulation of catalytic activity; EXPRESSED IN: 12 plant structures; EXPRESSED DURING: 4 anthesis, C globular stage, petal differentiation and expansion stage; CONTAINS InterPro DOMAIN/s: Protease-associated PA (InterPro:IPR003137), Proteinase inhibitor, propeptide (InterPro:IPR…	13.9288	11.7127	11.8762	18.0009	11.4716	11.7942	10.7034	12.7286	247697_at	P	P	P	A	A	A	P	A	12.8207	14.9386	11.6329	11.716	1.16519	0.907349	0.913831	1.00714	0.784279
247690_at	At5g59800	Protein containing methyl-CpG-binding domain.Has sequence similarity to human MBD proteins. Interacts with arginine methyltransferase 11. (AtPRMT11	26.5382	26.5382	30.0647	25.4572	25.8125	23.1029	26.7228	30.0647	247690_at	P	P	P	P	P	P	P	P	26.5382	27.7609	24.4577	28.3938	1.04607	0.921603	1.06992	1.16093	1.0228
247696_at	At5g59780	Encodes a putative transcription factor (MYB59).	1520.15	1734.13	1379.57	1009.9	873.098	1120.56	897.644	600.491	247696_at	P	P	P	P	P	P	P	P	1627.14	1194.73	996.827	749.068	0.734253	0.612624	0.460358	0.751452	0.626974			2
247689_at	At5g59770	Protein-tyrosine phosphatase-like, PTPLA; CONTAINS InterPro DOMAIN/s: Protein-tyrosine phosphatase-like, PTPLA (InterPro:IPR007482); BEST Arabidopsis thaliana protein match is: Protein-tyrosine phosphatase-like, PTPLA (TAIR:AT5G10480.2); Has 698 Blast hits to 698 proteins in 198 species: Archae - 0; Bacteria - 0; Metazoa - 336; Fungi - 172; Plants - 117; Viruses - 0; Other Eukaryotes - 73 (source…	99.7331	111.43	101.829	106.891	64	127.116	95.0095	106.153	247689_at	P	P	P	P	P	P	P	P	105.582	104.36	95.5579	100.581	0.988428	0.905061	0.952638	1.05257	0.963791
247688_at	At5g59760	Protein of unknown function (DUF1635); CONTAINS InterPro DOMAIN/s: Protein of unknown function DUF1635 (InterPro:IPR012862); BEST Arabidopsis thaliana protein match is: Protein of unknown function (DUF1635) (TAIR:AT2G28690.1); Has 104 Blast hits to 104 proteins in 17 species: Archae - 0; Bacteria - 0; Metazoa - 2; Fungi - 2; Plants - 100; Viruses - 0; Other Eukaryotes - 0 (source: NCBI BLink).	8.22491	7.6211	7.4127	8.28212	9.06307	8	7.3615	8.33973	247688_at	A	A	A	A	A	A	A	P	7.92301	7.84741	8.53154	7.85061	0.990459	1.07681	0.990863	0.920188	1.00041
247694_at	At5g59750	DHBP synthase RibB-like alpha/beta domain;GTP cyclohydrolase II; FUNCTIONS IN: 3,4-dihydroxy-2-butanone-4-phosphate synthase activity, GTP cyclohydrolase II activity; INVOLVED IN: riboflavin biosynthetic process; EXPRESSED IN: 23 plant structures; EXPRESSED DURING: 13 growth stages; CONTAINS InterPro DOMAIN/s: GTP cyclohydrolase II (InterPro:IPR000926), DHBP synthase RibB (InterPro:IPR000422), DH…	109.137	127.116	112.986	116.97	103.25	143.013	106.153	114.563	247694_at	P	P	P	P	P	P	P	P	118.127	114.978	123.131	110.358	0.973348	1.04237	0.934236	0.896262	0.959817
247687_at	At5g59740	UDP-N-acetylglucosamine (UAA) transporter family; FUNCTIONS IN: galactose transmembrane transporter activity; INVOLVED IN: transmembrane transport; EXPRESSED IN: 23 plant structures; EXPRESSED DURING: 13 growth stages; CONTAINS InterPro DOMAIN/s: UAA transporter (InterPro:IPR013657); BEST Arabidopsis thaliana protein match is: UDP-galactose transporter 5 (TAIR:AT3G46180.1); Has 1807 Blast hits to…	13.6422	12.996	12.996	13.6422	21.8566	14.2215	13.2691	13.1775	247687_at	P	P	P	P	P	P	P	P	13.3191	13.3191	18.0391	13.2233	1	1.35438	0.992806	0.733036	0.992806
247693_at	At5g59730	A member of EXO70 gene family, putative exocyst subunits, conserved in land plants. Arabidopsis thaliana contains 23 putative EXO70 genes, which can be classified into eight clusters on the phylogenetic tree.	265.028	398.932	312.996	621.668	451.944	584.071	340.144	484.382	247693_at	P	P	P	P	P	P	P	P	331.98	467.332	518.007	412.263	1.40771	1.56036	1.24183	0.795862	0.882162
247691_at	At5g59720	encodes a low molecular weight heat shock protein that contains the heat shock element in the promoter region. Expression is induced in response to heat shock.	17.3878	18.7654	15.1369	18.507	18.0009	17.3878	13.6422	19.9733	247691_at	A	A	A	A	A	A	A	P	18.0766	16.822	17.6943	16.8077	0.930596	0.978856	0.929808	0.949892	0.999153
247695_at	At5g59710	Encodes a nuclear-localized NOT (negative on TATA-less) domain-containing protein that interacts with the Agrobacterium VirE2 protein and is required for Agrobacterium-mediated plant transformation. It likely facilitates T-DNA integration into plant chromosomes and may play a role as a transcriptional regulator.	94.3532	87.4266	68.5935	59.3016	91.7731	71.0124	84.4485	73.0089	247695_at	P	P	P	P	P	P	P	P	90.8899	63.9476	81.3928	78.7287	0.703572	0.89551	0.866198	0.967269	1.23114
247686_at	At5g59700	Protein kinase superfamily protein; FUNCTIONS IN: kinase activity; INVOLVED IN: protein amino acid phosphorylation; LOCATED IN: plasma membrane; EXPRESSED IN: 8 plant structures; EXPRESSED DURING: 4 anthesis, petal differentiation and expansion stage; CONTAINS InterPro DOMAIN/s: Protein kinase, ATP binding site (InterPro:IPR017441), Malectin/receptor-like protein kinase (InterPro:IPR021720), Prot…	86.8227	106.891	84.4485	77.7085	81.0084	88.0347	79.8932	77.1717	247686_at	P	P	P	P	P	P	P	A	96.857	81.0785	84.5215	78.5324	0.837095	0.872643	0.810808	0.929141	0.968598
247692_s_at	At5g59690	Histone superfamily protein; FUNCTIONS IN: DNA binding; INVOLVED IN: nucleosome assembly; LOCATED IN: thylakoid; EXPRESSED IN: male gametophyte, pollen tube; EXPRESSED DURING: L mature pollen stage, M germinated pollen stage; CONTAINS InterPro DOMAIN/s: Histone H4, conserved site (InterPro:IPR019809), Histone-fold (InterPro:IPR009072), Histone core (InterPro:IPR007125), Histone H4 (InterPro:IPR00…	250.732	215.269	229.126	235.568	216.767	200.854	233.941	243.875	247692_s_at	P	P	P	P	P	P	P	P	233.001	232.347	208.81	238.908	0.997196	0.896179	1.02535	1.14414	1.02824
247685_at	At5g59680	Leucine-rich repeat protein kinase family protein; FUNCTIONS IN: kinase activity; INVOLVED IN: protein amino acid phosphorylation; LOCATED IN: endomembrane system; EXPRESSED IN: 7 plant structures; EXPRESSED DURING: 6 growth stages; CONTAINS InterPro DOMAIN/s: Protein kinase, ATP binding site (InterPro:IPR017441), Protein kinase, catalytic domain (InterPro:IPR000719), Leucine-rich repeat (InterPr…	13.6422	11.2356	14.9285	12.042	13.5479	9.25351	8.45614	8.51496	247685_at	A	P	P	A	P	A	A	A	12.4389	13.4853	11.4007	8.48555	1.08412	0.91654	0.682181	0.7443	0.629247
247684_at	At5g59670	Leucine-rich repeat protein kinase family protein; FUNCTIONS IN: kinase activity; INVOLVED IN: protein amino acid phosphorylation; LOCATED IN: endomembrane system; EXPRESSED IN: 17 plant structures; EXPRESSED DURING: 13 growth stages; CONTAINS InterPro DOMAIN/s: Protein kinase, ATP binding site (InterPro:IPR017441), Protein kinase, catalytic domain (InterPro:IPR000719), Leucine-rich repeat (Inter…	16.2234	18.1261	15.1369	14.42	23.4254	12.2101	13.2691	11.7942	247684_at	A	P	P	P	A	P	P	P	17.1747	14.7785	17.8177	12.5316	0.860476	1.03744	0.729655	0.703324	0.847966
247683_at	At5g59660	Leucine-rich repeat protein kinase family protein; FUNCTIONS IN: protein serine/threonine kinase activity, kinase activity, ATP binding; INVOLVED IN: transmembrane receptor protein tyrosine kinase signaling pathway, protein amino acid phosphorylation; LOCATED IN: cellular_component unknown; EXPRESSED IN: 7 plant structures; EXPRESSED DURING: LP.04 four leaves visible; CONTAINS InterPro DOMAIN/s: …	12.3805	13.8326	13.4543	12.6407	14.8254	14.1232	10.1261	11.0043	247683_at	A	P	P	A	P	A	A	A	13.1066	13.0475	14.4743	10.5652	0.995494	1.10436	0.8061	0.729926	0.809748
247682_at	At5g59650	Leucine-rich repeat protein kinase family protein; FUNCTIONS IN: protein serine/threonine kinase activity, protein kinase activity, kinase activity, ATP binding; INVOLVED IN: protein amino acid phosphorylation; LOCATED IN: endomembrane system; EXPRESSED IN: 15 plant structures; EXPRESSED DURING: 7 growth stages; CONTAINS InterPro DOMAIN/s: Protein kinase, ATP binding site (InterPro:IPR017441), Se…	9.25351	8.1681	8.22491	7.83536	10.4831	7.31065	7.21	7.31065	247682_at	P	P	A	A	P	A	M	P	8.7108	8.03014	8.8969	7.26033	0.92186	1.02136	0.833486	0.816051	0.904135
247681_at	At5g59640	transposable element gene; CACTA-like transposase family (En/Spm), has a 5.1e-159 P-value blast match to GB:AAD55677 putative transposase protein (CACTA-element) transposon="Shooter" (Zea mays)	9.64646	10.1965	9.84916	11.7942	9.78112	10.1261	9.25351	9.71356	247681_at	A	A	A	P	A	A	A	A	9.92147	10.8217	9.95359	9.48353	1.09073	1.00324	0.955859	0.952775	0.876348
247680_s_at	At5g59630	pseudogene, glycine-rich protein, blastp match of 53% identity and 5.4e-10 P-value to GP|9837280|gb|AAG00510.1||AF285172 leaf senescence-associated receptor-like protein kinase {Phaseolus vulgaris}	7.06162	7.06162	6.58873	6.82108	7.4127	7.31065	6.54322	7.06162	247680_s_at	A	A	A	A	A	A	A	P	7.06162	6.7049	7.36168	6.80242	0.949485	1.04249	0.963294	0.924031	1.01454
247733_at	At5g59610	Chaperone DnaJ-domain superfamily protein; FUNCTIONS IN: unfolded protein binding, heat shock protein binding; INVOLVED IN: protein folding; EXPRESSED IN: 24 plant structures; EXPRESSED DURING: 15 growth stages; CONTAINS InterPro DOMAIN/s: Molecular chaperone, heat shock protein, Hsp40, DnaJ (InterPro:IPR015609), Heat shock protein DnaJ, N-terminal (InterPro:IPR001623), Heat shock protein DnaJ (I…	79.8932	69.551	81.5719	75.0614	77.7085	81.0084	74.5429	71.0124	247733_at	P	P	P	P	P	P	P	P	74.7221	78.3167	79.3584	72.7777	1.04811	1.06205	0.973978	0.917076	0.929275
247732_at	At5g59600	Tetratricopeptide repeat (TPR)-like superfamily protein; CONTAINS InterPro DOMAIN/s: Pentatricopeptide repeat (InterPro:IPR002885); BEST Arabidopsis thaliana protein match is: Tetratricopeptide repeat (TPR)-like superfamily protein (TAIR:AT4G33990.1); Has 1807 Blast hits to 1807 proteins in 277 species: Archae - 0; Bacteria - 0; Metazoa - 736; Fungi - 347; Plants - 385; Viruses - 0; Other Eukaryo…	6.82108	7.3615	7.4127	7.11074	6.49802	7.83536	7.06162	6.58873	247732_at	A	A	A	A	P	A	A	A	7.09129	7.26172	7.16669	6.82518	1.02403	1.01063	0.962473	0.952347	0.939884
247731_at	At5g59590	UDP-glucosyl transferase 76E2 (UGT76E2); FUNCTIONS IN: quercetin 3-O-glucosyltransferase activity, UDP-glycosyltransferase activity, quercetin 7-O-glucosyltransferase activity; INVOLVED IN: metabolic process; LOCATED IN: cellular_component unknown; EXPRESSED IN: 6 plant structures; EXPRESSED DURING: 4 anthesis, petal differentiation and expansion stage; CONTAINS InterPro DOMAIN/s: UDP-glucuronosy…	11.3924	10.2674	10.9283	10.8528	12.9063	9.91766	9.12611	10.5561	247731_at	P	A	A	A	P	A	A	P	10.8299	10.8906	11.412	9.84109	1.0056	1.05375	0.908696	0.862348	0.903633
[truncated: 21,908 more rows]

## Sheet: selections
																				2 times	2 times	2 times	2 times	2 times	2 times	2 times	2 times	2 times	2 times	2 times	2 times	2 times	2 times
[truncated: 396 more rows]
